# Supplementary material for: SWATH Based Quantitative Proteomics Reveals Significant Lipid Metabolism in Early Myopic Guinea Pig Retina
Source: MDPI journal article supplement (doi:10.3390/ijms22094721), 2021-04-29
Supplement: s1 [file s1]

**Table S2. 58 differentially expressed proteins after 4-day LIM in myopic guinea pig retina**

| No. | Uniprot ID | Protein name                                           | Gene name  | Length | Mass    | Ratio | LOG 2 (ratio) | P value |
|-----|------------|--------------------------------------------------------|------------|--------|---------|-------|---------------|---------|
| 1   | H0VCR4     | Protein ABHD11                                         | ABHD11     | 315    | 34,690  | 1.93  | 0.95          | 0.014   |
| 2   | H0VNU2     | Dymeclin                                               | DYM        | 669    | 75,927  | 1.80  | 0.84          | 0.023   |
| 3   | H0VGV7     | Tectonin beta-propeller repeat-containing protein 1    | TECPR1     | 1166   | 129,743 | 1.76  | 0.81          | 0.023   |
| 4   | H0V4D2     | Bardet-Biedl syndrome 5 protein homolog                | BBS5       | 320    | 36,505  | 1.51  | 0.59          | 0.021   |
| 5   | H0UYC3     | Adenylosuccinate synthetase isozyme 2                  | ADSS ADSS2 | 453    | 49,644  | 1.50  | 0.58          | 0.016   |
| 6   | H0VGS3     | Actin alpha cardiac muscle 1                           | ACTC1      | 377    | 42,019  | 1.45  | 0.53          | 0.003   |
| 7   | H0VZA3     | Dolichol-phosphate mannosyltransferase subunit 3       | DPM3       | 92     | 10,028  | 1.42  | 0.5           | 0.030   |
| 8   | H0VPG0     | VPS35 endosomal protein sorting factor like            | VPS35L     | 940    | 106,942 | 1.34  | 0.42          | 0.045   |
| 9   | H0VS95     | Transporter                                            | SLC6A6     | 620    | 69,558  | 1.33  | 0.41          | 0.029   |
| 10  | Q9TEH1     | NADH-ubiquinone oxidoreductase chain 1                 | NADH1 ND1  | 319    | 35,846  | 1.32  | 0.4           | 0.043   |
| 11  | H0WCP2     | Oligosaccharyltransferase complex subunit OSTC         | OSTC       | 149    | 16,829  | 1.31  | 0.39          | 0.006   |
| 12  | H0VHU4     | EPH receptor B2                                        | EPHB2      | 949    | 105,886 | 1.31  | 0.39          | 0.016   |
| 13  | H0VNF6     | PRA1 family protein 3                                  | ARL6IP5    | 188    | 21,615  | 1.31  | 0.39          | 0.017   |
| 14  | H0VHC4     | Calcineurin like phosphoesterase domain containing 1   | CPPED1     | 238    | 27,382  | 1.31  | 0.39          | 0.035   |
| 15  | H0VHE3     | Phosphatidate cytidyltransferase 1                     | CDS1       | 461    | 53,304  | 1.30  | 0.38          | 0.009   |
| 16  | H0VGB4     | 1,5-anhydro-D-fructose reductase                       | AKR1E2     | 320    | 36,589  | 1.28  | 0.36          | 0.005   |
| 17  | H0VSK3     | Serine palmitoyltransferase long chain base subunit 1  | SPTLC1     | 461    | 51,397  | 1.28  | 0.36          | 0.014   |
| 18  | H0VXL5     | Tubulin alpha chain                                    | TUBA1B     | 451    | 50,152  | 1.28  | 0.35          | 0.018   |
| 19  | H0VRA2     | Ras homolog family member C                            | RHOC       | 193    | 22,006  | 1.26  | 0.34          | 0.001   |
| 20  | H0V0E8     | Stearoyl-CoA desaturase 5                              | SCD5       | 315    | 35,645  | 1.26  | 0.34          | 0.011   |
| 21  | H0VRH7     | Vesicle transport protein GOT1B                        | GOLT1B     | 138    | 15,426  | 1.26  | 0.33          | 0.022   |
| 22  | H0WDS3     | Coiled-coil domain containing 22                       | CCDC22     | 566    | 63,926  | 1.25  | 0.33          | 0.033   |
| 23  | H0UXY7     | Gamma-aminobutyric acid type A receptor gamma2 subunit | GABRG2     | 475    | 55,285  | 1.25  | 0.32          | 0.005   |
| 24  | H0V025     | Methylthioribulose-1-phosphate                         | APIP       | 242    | 27,317  | 1.24  | 0.32          | 0.018   |

|    |        |                                                                  |              |          |          |      |       |       |
|----|--------|------------------------------------------------------------------|--------------|----------|----------|------|-------|-------|
|    |        | dehydratase                                                      |              |          |          |      |       |       |
| 25 | H0V6H0 | Prostaglandin E synthase 2                                       | PTGES2       | 377      | 41,943   | 1.23 | 0.3   | 0.032 |
| 26 | H0V181 | 3'(2'),5'-bisphosphate<br>nucleotidase 1                         | BPNT1        | 308      | 33,392   | 1.22 | 0.29  | 0.002 |
| 27 | H0V7H8 | Vitamin K epoxide reductase<br>complex subunit 1                 | VKORC1       | 163      | 18,149   | 1.22 | 0.29  | 0.029 |
| 28 | H0UU62 | Alpha-galactosidase                                              | GLA          | 428      | 48,843   | 1.22 | 0.29  | 0.032 |
| 29 | H0WD05 | 1-acyl-sn-glycerol-3-phosphate<br>acyltransferase alpha          | AGPAT1       | 283      | 31,717   | 1.23 | 0.29  | 0.041 |
| 30 | H0V8H2 | DEAD-box helicase 19B                                            | DDX19B       | 464      | 52,257   | 1.21 | 0.28  | 0.018 |
| 31 | H0VLQ2 | Trafficking protein particle<br>complex 8                        | TRAPPC8      | 1318     | 148,181  | 1.21 | 0.28  | 0.033 |
| 32 | H0V1X0 | Adenosine 3'-phospho<br>5'-phosphosulfate transporter 1          | SLC35B2      | 432      | 47,515   | 1.21 | 0.28  | 0.042 |
| 33 | H0V8U6 | Isocitrate dehydrogenase<br>[NAD] subunit, mitochondrial         | Idh3g        | 389      | 42,418   | 1.21 | 0.28  | 0.049 |
| 34 | H0V0N9 | Single stranded DNA binding<br>protein 1                         | SSBP1        | 137      | 15,978   | 1.21 | 0.27  | 0.004 |
| 35 | H0WA47 | Dehydrogenase/reductase 7                                        | DHRS7        | 408      | 45,532   | 1.20 | 0.27  | 0.008 |
| 36 | H0VJT5 | High mobility group 20A                                          | HMG20A       | 347      | 40,088   | 1.21 | 0.27  | 0.036 |
| 37 | H0W436 | Transmembrane protein 201                                        | TMEM201      | 631      | 68,169   | 1.21 | 0.27  | 0.038 |
| 38 | H0VPT6 | Small nuclear ribonucleoprotein<br>polypeptide F                 | SNRPF        | 86       | 9,725    | 0.83 | -0.27 | 0.024 |
| 39 | H0V710 | Deleted.                                                         | SNCB         | Deleted. | Deleted. | 0.82 | -0.28 | 0.047 |
| 40 | H0VLL0 | Ubiquitin carboxyl-terminal<br>hydrolase                         | USP10        | 780      | 83,835   | 0.81 | -0.3  | 0.026 |
| 41 | H0VHK3 | Transformer 2 alpha homolog                                      | TRA2A        | 282      | 32,689   | 0.80 | -0.33 | 0.011 |
| 42 | H0V6V5 | Cytochrome c oxidase assembly<br>protein COX19                   | COX19        | 90       | 10,394   | 0.79 | -0.33 | 0.032 |
| 43 | H0VQH8 | Phospholipase B-like                                             | PLBD2        | 585      | 64,721   | 0.77 | -0.37 | 0.042 |
| 44 | H0UZ87 | Citrate lyase beta like                                          | CLYBL        | 343      | 37,599   | 0.76 | -0.39 | 0.042 |
| 45 | H0VAA0 | Myosin XVIII A                                                   | MYO18A       | 2048     | 232,907  | 0.75 | -0.41 | 0.028 |
| 46 | H0UT88 | Eukaryotic translation initiation<br>factor 4E-binding protein 2 | EIF4EBP2     | 120      | 12,939   | 0.75 | -0.42 | 0.032 |
| 47 | H0VZE8 | Deleted.                                                         | LOC100728264 | Deleted. | Deleted. | 0.73 | -0.46 | 0.027 |
| 48 | H0V9I8 | Fatty acid-binding protein,<br>adipocyte                         | FABP4        | 132      | 14,719   | 0.72 | -0.48 | 0.002 |
| 49 | H0V9Q6 | Uncharacterized protein                                          | Tpm1         | 248      | 28,703   | 0.72 | -0.48 | 0.034 |
| 50 | H0VFF6 | Secretogranin II                                                 | SCG2         | 550      | 63,181   | 0.71 | -0.5  | 0.002 |
| 51 | H0VXR3 | Ribosomal protein L8                                             | RPL8         | 257      | 28,025   | 0.71 | -0.5  | 0.016 |
| 52 | H0VV40 | Steroid receptor RNA activator                                   | SRA1         | 233      | 25,431   | 0.71 | -0.5  | 0.050 |

|    |        |                                                          |          |     |        |      |       |       |
|----|--------|----------------------------------------------------------|----------|-----|--------|------|-------|-------|
|    |        | 1                                                        |          |     |        |      |       |       |
| 53 | H0WDR4 | Chromosome 12 open reading<br>frame 57                   | C12orf57 | 126 | 13,196 | 0.70 | -0.52 | 0.011 |
| 54 | H0W915 | Parvalbumin alpha                                        | PVALB    | 110 | 12,165 | 0.67 | -0.59 | 0.031 |
| 55 | H0VFA5 | Protein phosphatase 1<br>regulatory subunit 21           | PPP1R21  | 761 | 86,310 | 0.64 | -0.64 | 0.013 |
| 56 | H0UZI9 | Protein yippee-like 5                                    | YPEL5    | 121 | 13,842 | 0.62 | -0.7  | 0.026 |
| 57 | H0UW36 | PSME3-interacting protein                                | Fam192a  | 254 | 28,912 | 0.61 | -0.71 | 0.018 |
| 58 | H0UWL4 | Transmembrane p24 trafficking<br>protein family member 8 | TMED8    | 326 | 35,935 | 0.54 | -0.9  | 0.039 |
