# Supplementary material for: SWATH Based Quantitative Proteomics Reveals Significant Lipid Metabolism in Early Myopic Guinea Pig Retina
Source: MDPI journal article supplement (doi:10.3390/ijms22094721), 2021-04-29
Supplement: s1 [file s1]

**Table S3. Peptides and transitions of proteins involved in lipid metabolism using MRM based proteomic approach.**

| No. | UniProt. accession number | Peptides          | Transitions        |
|-----|---------------------------|-------------------|--------------------|
| 1   | A0A286XCE4                | NIFTGLIGPMK       | +2b8, +2y7, +2y9   |
|     |                           | TYIWQIPER         | +2y7, +2y6, +2y5   |
| 2   | H0VS95                    | FPYLC[CAM]YK      | +2y6, +2y5, +2y4   |
|     |                           | FYLYPDLSR         | +2y7, +2y6, +2b3   |
| 3   | A0A286XGK4                | EEQLQFLIR         | +2y7, +2y5, +2y4   |
| 4   | H0VSK3                    | VVVTVEQTEELER     | +2y12, +2y11, +2y9 |
| 5   | H0WDS3                    | TFAVTDELVFK       | +2y9, +2y7, +2b10  |
| 6   | A0A286XMC0                | TPGEALASFDYIVHEGK | +3b6, +3b11, +3y8  |
| 7   | H0UU62                    | TQINPTGTVLFR      | +2y10, +2y8, +2y9  |
| 8   | B5AN23                    | AITIFQER          | +2y6, +2y5, +2y4   |
|     |                           | VIPELNGK          | +2y6, +2y4, +2y5   |
|     |                           | LTGMAFR           | +2y3, +2y5, +2y6   |
