# Supplementary material for: SWATH Based Quantitative Proteomics Reveals Significant Lipid Metabolism in Early Myopic Guinea Pig Retina
Source: MDPI journal article supplement (doi:10.3390/ijms22094721), 2021-04-29

**Figure S4.** 25 significant pathways crosstalk with each other by shared common genes generated by Ingenuity Pathway Analysis

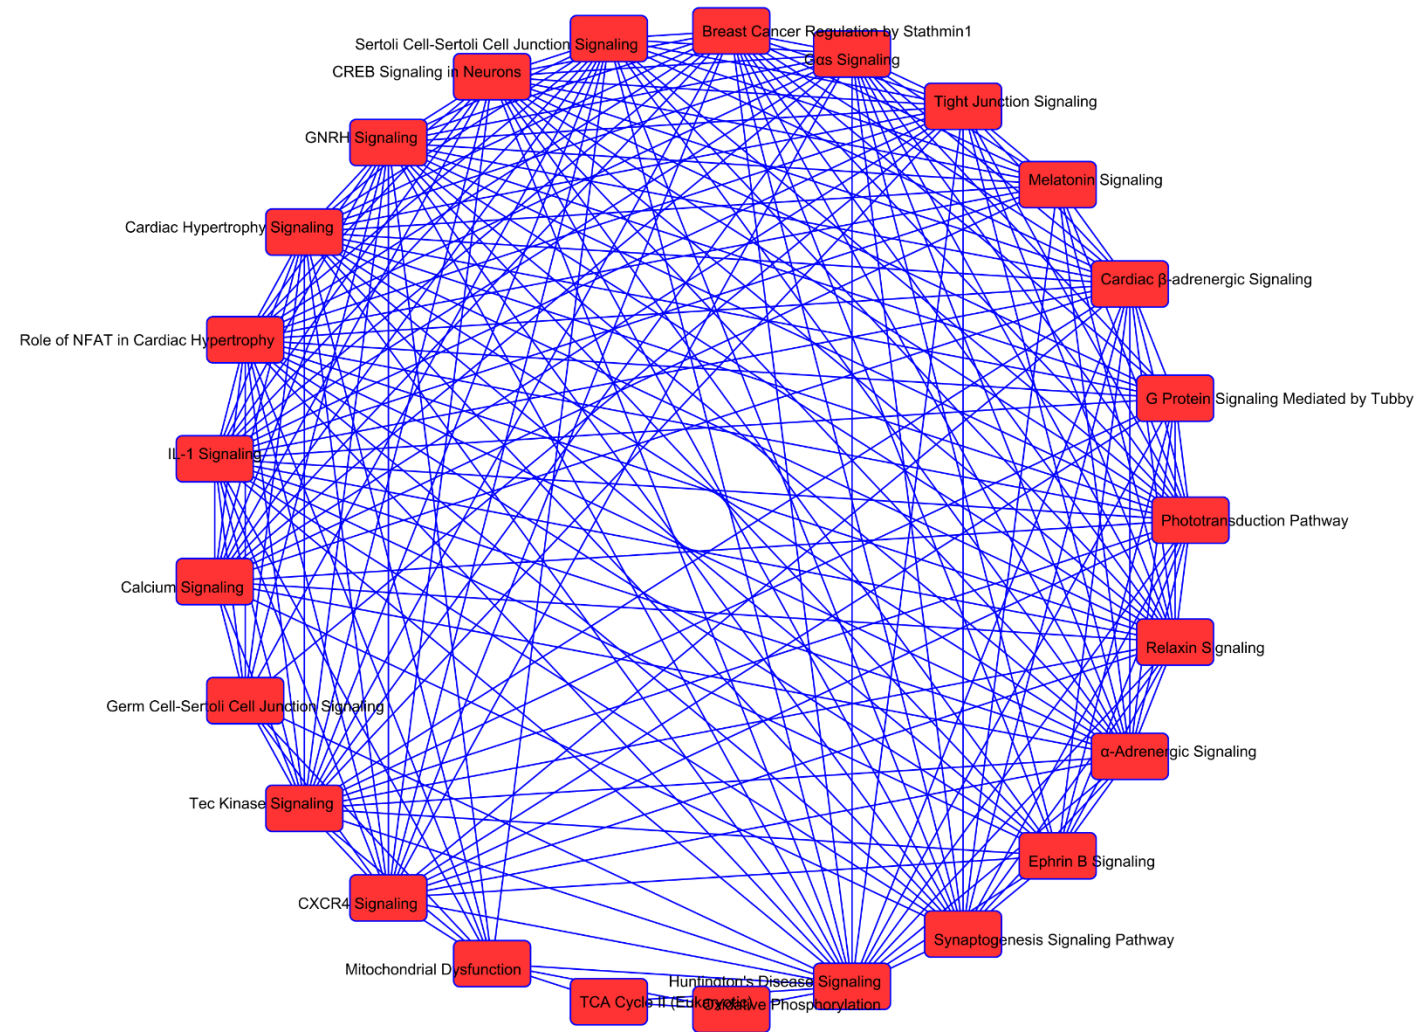

Supplement: s1 [file s1]
