# Supplementary material for: SWATH Based Quantitative Proteomics Reveals Significant Lipid Metabolism in Early Myopic Guinea Pig Retina
Source: MDPI journal article supplement (doi:10.3390/ijms22094721), 2021-04-29

**Figure S2.** FDR analysis of combined IDA library of retina at peptide level generated by Protein Pilot software

Distinct Peptide Level FDR Analysis

Peptides Identified at Critical False Discovery Rates

| Number of Peptides Identified |           |            |                     |
|-------------------------------|-----------|------------|---------------------|
| Critical FDR                  | Local FDR | Global FDR | Global FDR from Fit |
| 1.0%                          | 18216     | 24687      | 24616               |
| 5.0%                          | 23201     | 30618      | 30591               |
| 10.0%                         | 25266     | 36902      | 34576               |

\* It is recommended you use numbers in bold and avoid using numbers in italics.

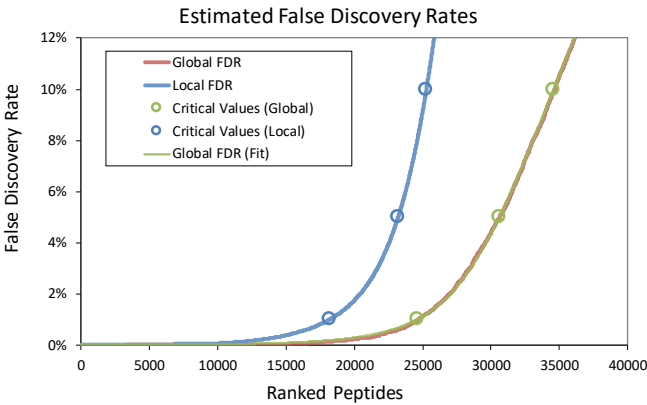

Correspondence between FDR Levels and ProteinPilot Reported Confidences

| Corresponding ProteinPilot Confidence |           |            |                     |
|---------------------------------------|-----------|------------|---------------------|
| Critical FDR                          | Local FDR | Global FDR | Global FDR from Fit |
| 1.0%                                  | 99.3%     | 92.7%      | 92.9%               |
| 5.0%                                  | 95.9%     | 59.1%      | 59.2%               |
| 10.0%                                 | 91.0%     | 37.4%      | 37.8%               |

\* It is recommended you use numbers in bold and avoid using numbers in italics.

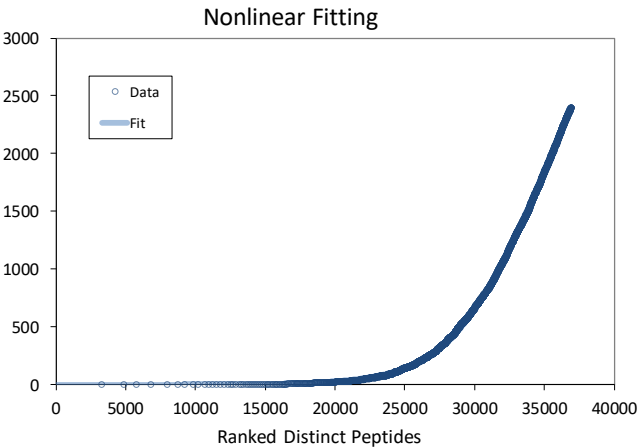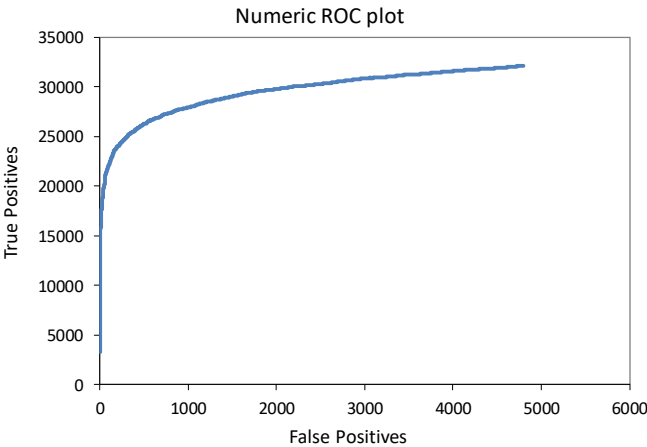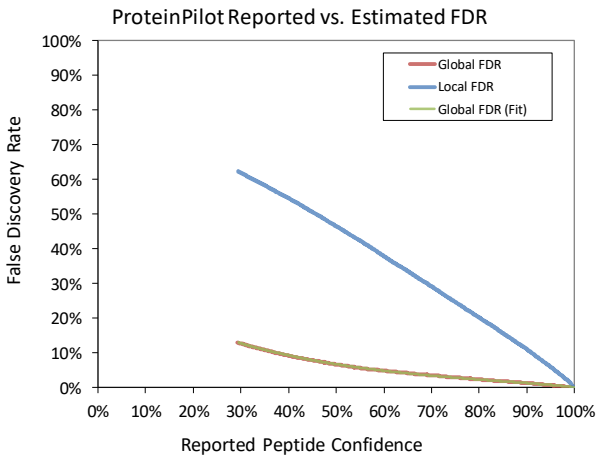

Supplement: s1 [file s1]
