# Supplementary material for: SWATH Based Quantitative Proteomics Reveals Significant Lipid Metabolism in Early Myopic Guinea Pig Retina
Source: MDPI journal article supplement (doi:10.3390/ijms22094721), 2021-04-29

**Figure S1.** FDR analysis of combined IDA library of retina at protein level generated by Protein Pilot software

Protein-Level FDR Analysis

Proteins Identified at Critical False Discovery Rates

| Number of Proteins Detected |           |            |                     |
|-----------------------------|-----------|------------|---------------------|
| Critical FDR                | Local FDR | Global FDR | Global FDR from Fit |
| 1.0%                        | 2720      | 3183       | 3202                |
| 5.0%                        | 2979      | 3614       | 3623                |
| 10.0%                       | 3095      | 4169       | 3981                |

*\* It is recommended you use numbers in bold and avoid using numbers in italics.*

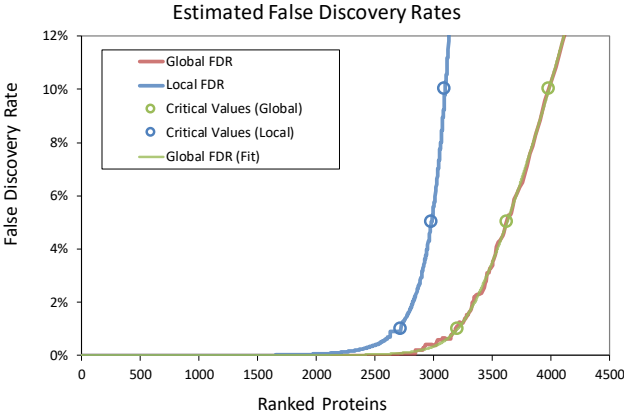

Correspondence between FDR Levels and ProteinPilot Reported Confidences

| Corresponding ProteinPilot Confidence |           |            |                     |
|---------------------------------------|-----------|------------|---------------------|
| Critical FDR                          | Local FDR | Global FDR | Global FDR from Fit |
| 1.0%                                  | 99.0%     | 85.9%      | 84.9%               |
| 5.0%                                  | 94.5%     | 47.5%      | 46.3%               |
| 10.0%                                 | 90.5%     | 25.9%      | 24.1%               |

| Corresponding Unused ProtScore |           |            |                     |
|--------------------------------|-----------|------------|---------------------|
| Critical FDR                   | Local FDR | Global FDR | Global FDR from Fit |
| 1.0%                           | 2.000     | 0.850      | 0.820               |
| 5.0%                           | 1.260     | 0.280      | 0.270               |
| 10.0%                          | 1.020     | 0.130      | 0.120               |

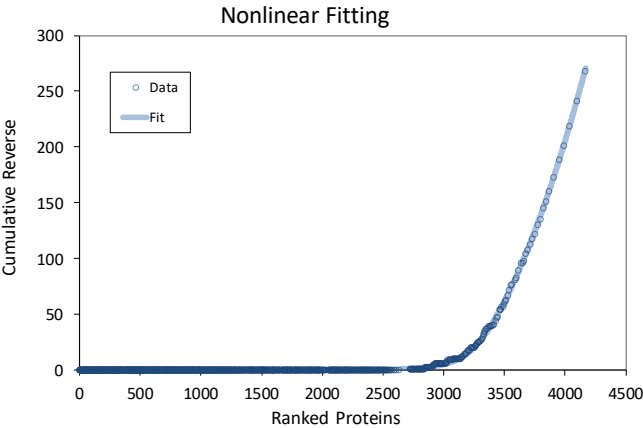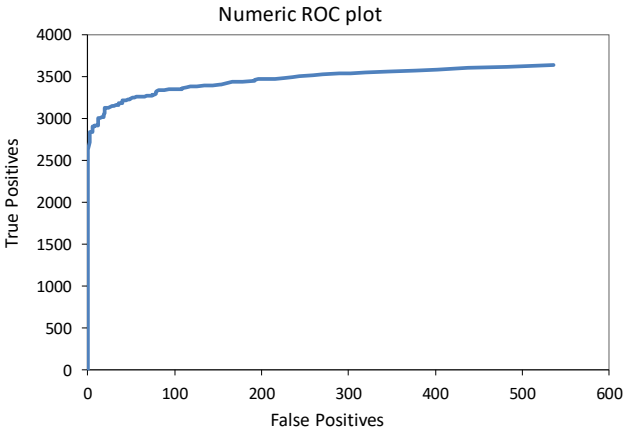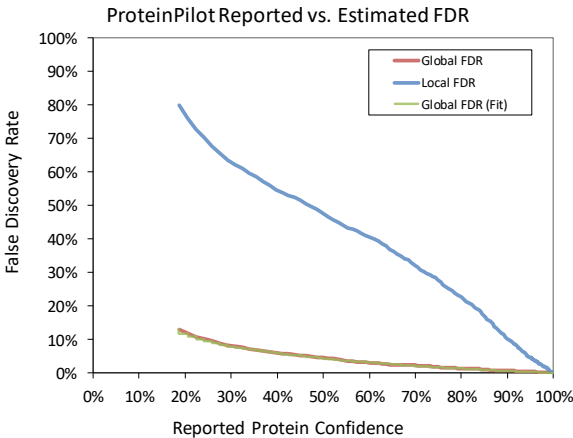

Supplement: s1 [file s1]
