# Supplementary material for: SWATH Based Quantitative Proteomics Reveals Significant Lipid Metabolism in Early Myopic Guinea Pig Retina
Source: MDPI journal article supplement (doi:10.3390/ijms22094721), 2021-04-29
Supplement: s1 [file s1]

**Table S1. The full list of 3202 identified unique proteins at global 1% FDR.**

| No. | Unused Score | Total score | %Cov  | %Cov(50) | %Cov(95) | Accession              | Name                                                                         | Species | Peptides(95%) |
|-----|--------------|-------------|-------|----------|----------|------------------------|------------------------------------------------------------------------------|---------|---------------|
| 1   | 263.3        | 263         | 47.22 | 42.08    | 33.73    | tr H0V2C0 H0V2C0_CAVPO | Uncharacterized protein OS=Cavia porcellus<br>GN=DYNC1H1 PE=4 SV=1           | CAVPO   | 133           |
| 2   | 229.33       | 229         | 64.24 | 59.55    | 56.87    | tr H0VEL7 H0VEL7_CAVPO | Uncharacterized protein (Fragment) OS=Cavia<br>porcellus GN=SPTAN1 PE=4 SV=1 | CAVPO   | 127           |
| 3   | 216.89       | 218         | 65.08 | 61.97    | 56.46    | tr H0VI20 H0VI20_CAVPO | Uncharacterized protein (Fragment) OS=Cavia<br>porcellus GN=SPTBN1 PE=4 SV=1 | CAVPO   | 116           |
| 4   | 179.52       | 180         | 58.34 | 56.71    | 56.23    | tr H0V795 H0V795_CAVPO | Uncharacterized protein OS=Cavia porcellus<br>GN=MAP1B PE=4 SV=1             | CAVPO   | 127           |
| 5   | 161.37       | 161         | 50.7  | 42.93    | 42.48    | tr H0VAM7 H0VAM7_CAVPO | Uncharacterized protein OS=Cavia porcellus<br>GN=CROCC PE=4 SV=1             | CAVPO   | 92            |
| 6   | 150.06       | 150         | 56.42 | 54.33    | 52.3     | tr H0V5M6 H0V5M6_CAVPO | Clathrin heavy chain OS=Cavia porcellus<br>GN=CLTC PE=3 SV=1                 | CAVPO   | 109           |
| 7   | 116.68       | 117         | 40.83 | 36.22    | 31.87    | tr H0VTF1 H0VTF1_CAVPO | Uncharacterized protein (Fragment) OS=Cavia<br>porcellus GN=ABCA4 PE=3 SV=1  | CAVPO   | 63            |
| 8   | 108.95       | 109         | 94.8  | 92.08    | 90.35    | tr A4L9L4 A4L9L4_CAVPO | S-antigen OS=Cavia porcellus GN=Sag PE=2<br>SV=1                             | CAVPO   | 206           |
| 9   | 107.96       | 108         | 45.77 | 39.35    | 33.23    | tr H0V2D1 H0V2D1_CAVPO | Uncharacterized protein OS=Cavia porcellus<br>GN=MYH10 PE=4 SV=1             | CAVPO   | 58            |
| 10  | 105.97       | 106         | 21.66 | 14.4     | 8.301    | tr H0VH85 H0VH85_CAVPO | Uncharacterized protein (Fragment) OS=Cavia<br>porcellus GN=MACF1 PE=4 SV=1  | CAVPO   | 45            |
| 11  | 105.46       | 105         | 42.59 | 35.04    | 28.85    | tr H0UY83 H0UY83_CAVPO | Uncharacterized protein OS=Cavia porcellus<br>GN=FASN PE=4 SV=1              | CAVPO   | 54            |
| 12  | 105.05       | 105         | 54.6  | 51.4     | 46.11    | tr H0VJR7 H0VJR7_CAVPO | Uncharacterized protein (Fragment) OS=Cavia<br>porcellus GN=AGL PE=4 SV=1    | CAVPO   | 61            |

|    |        |      |       |       |       |                        |                                                                                   |       |     |
|----|--------|------|-------|-------|-------|------------------------|-----------------------------------------------------------------------------------|-------|-----|
| 13 | 102.26 | 103  | 82.49 | 75.89 | 73.82 | tr H0VDN8 H0VDN8_CAVPO | Pyruvate kinase OS=Cavia porcellus GN=PKM<br>PE=3 SV=1                            | CAVPO | 130 |
| 14 | 96.97  | 97   | 75.58 | 71.21 | 65.21 | tr H0UXJ8 H0UXJ8_CAVPO | Uncharacterized protein OS=Cavia porcellus<br>GN=HSP90AA1 PE=3 SV=1               | CAVPO | 90  |
| 15 | 96.78  | 96.9 | 44.99 | 41.73 | 36.03 | tr H0VTB2 H0VTB2_CAVPO | DNA topoisomerase 2 (Fragment) OS=Cavia<br>porcellus GN=TOP2B PE=3 SV=1           | CAVPO | 53  |
| 16 | 95.74  | 95.8 | 91.78 | 91.78 | 89.86 | tr H0W3T8 H0W3T8_CAVPO | Uncharacterized protein (Fragment) OS=Cavia<br>porcellus GN=ALDOC PE=4 SV=1       | CAVPO | 184 |
| 17 | 94.08  | 94.1 | 89.01 | 87.93 | 84.91 | tr B5A9S3 B5A9S3_CAVPO | Vimentin OS=Cavia porcellus GN=Vim PE=2<br>SV=1                                   | CAVPO | 141 |
| 18 | 89.57  | 89.6 | 36.84 | 30.38 | 25.05 | tr H0V8J7 H0V8J7_CAVPO | Uncharacterized protein OS=Cavia porcellus<br>GN=SNRNP200 PE=4 SV=1               | CAVPO | 44  |
| 19 | 89.07  | 89.1 | 37.56 | 26.98 | 21.41 | tr H0VGR9 H0VGR9_CAVPO | Uncharacterized protein OS=Cavia porcellus<br>GN=PRPF8 PE=4 SV=1                  | CAVPO | 42  |
| 20 | 87.44  | 87.4 | 56.4  | 55.59 | 50.23 | tr H0VHR6 H0VHR6_CAVPO | Uncharacterized protein OS=Cavia porcellus<br>GN=ACLY PE=4 SV=1                   | CAVPO | 49  |
| 21 | 87.26  | 87.3 | 54.8  | 49.65 | 47.18 | tr H0VH73 H0VH73_CAVPO | Uncharacterized protein (Fragment) OS=Cavia<br>porcellus GN=Atp1a3 PE=3 SV=1      | CAVPO | 60  |
| 22 | 86.07  | 86.1 | 82.47 | 79.78 | 78.88 | tr H0VKE0 H0VKE0_CAVPO | Uncharacterized protein OS=Cavia porcellus<br>GN=TUBB4B PE=3 SV=1                 | CAVPO | 139 |
| 23 | 85.98  | 86.7 | 66.46 | 58.51 | 53.92 | tr H0VKT6 H0VKT6_CAVPO | Uncharacterized protein OS=Cavia porcellus<br>GN=EPB41L2 PE=4 SV=1                | CAVPO | 59  |
| 24 | 84.88  | 85   | 88.59 | 87.99 | 87.99 | tr B5AN23 B5AN23_CAVPO | Glyceraldehyde 3-phosphate dehydrogenase<br>OS=Cavia porcellus GN=Gapdh PE=2 SV=1 | CAVPO | 208 |
| 25 | 83.53  | 83.7 | 37.14 | 26.67 | 21.4  | tr H0V7C5 H0V7C5_CAVPO | Uncharacterized protein OS=Cavia porcellus<br>GN=TLN2 PE=4 SV=1                   | CAVPO | 39  |
| 26 | 83.46  | 83.6 | 94.93 | 92.4  | 89.63 | tr A9YWS9 A9YWS9_CAVPO | Alpha-enolase OS=Cavia porcellus GN=Eno1<br>PE=2 SV=1                             | CAVPO | 175 |

|    |       |      |       |       |       |                        |                                                                              |       |     |
|----|-------|------|-------|-------|-------|------------------------|------------------------------------------------------------------------------|-------|-----|
| 27 | 82.48 | 82.5 | 67.07 | 58.4  | 56.42 | tr H0VK93 H0VK93_CAVPO | Uncharacterized protein OS=Cavia porcellus<br>GN=ACTN4 PE=4 SV=1             | CAVPO | 48  |
| 28 | 81.83 | 81.8 | 52.69 | 52.58 | 49.18 | tr H0W2R8 H0W2R8_CAVPO | Uncharacterized protein OS=Cavia porcellus<br>GN=PDE6B PE=4 SV=1             | CAVPO | 46  |
| 29 | 80.28 | 80.3 | 60.37 | 58.44 | 57.86 | tr H0V091 H0V091_CAVPO | Reticulon (Fragment) OS=Cavia porcellus<br>GN=RTN4 PE=4 SV=1                 | CAVPO | 49  |
| 30 | 78.99 | 79   | 93.35 | 92.46 | 92.24 | tr H0W9T4 H0W9T4_CAVPO | Uncharacterized protein (Fragment) OS=Cavia<br>porcellus GN=TUBA1B PE=3 SV=1 | CAVPO | 142 |
| 31 | 77.54 | 77.6 | 38.8  | 30.41 | 27.76 | tr H0VDA8 H0VDA8_CAVPO | Uncharacterized protein (Fragment) OS=Cavia<br>porcellus GN=NUMA1 PE=4 SV=1  | CAVPO | 43  |
| 32 | 76.68 | 76.7 | 46.68 | 37.26 | 32.78 | tr H0VCT0 H0VCT0_CAVPO | Microtubule-associated protein OS=Cavia<br>porcellus GN=MAP2 PE=3 SV=1       | CAVPO | 48  |
| 33 | 75.97 | 76   | 54.54 | 52.08 | 48.11 | tr H0UZR6 H0UZR6_CAVPO | Uncharacterized protein OS=Cavia porcellus<br>GN=UBA1 PE=3 SV=1              | CAVPO | 49  |
| 34 | 75.36 | 75.4 | 41.95 | 38.37 | 36.5  | tr H0UX20 H0UX20_CAVPO | Uncharacterized protein OS=Cavia porcellus<br>GN=CAND1 PE=4 SV=1             | CAVPO | 40  |
| 35 | 75.24 | 75.2 | 52.37 | 47.52 | 42.99 | tr H0V6T6 H0V6T6_CAVPO | Uncharacterized protein (Fragment) OS=Cavia<br>porcellus GN=HK1 PE=3 SV=1    | CAVPO | 44  |
| 36 | 74.49 | 74.5 | 54.07 | 50.12 | 49.07 | tr H0VZJ1 H0VZJ1_CAVPO | Uncharacterized protein OS=Cavia porcellus<br>GN=DNM1 PE=3 SV=1              | CAVPO | 39  |
| 37 | 71.87 | 71.9 | 65.13 | 64.62 | 62.18 | tr H0VLW4 H0VLW4_CAVPO | Uncharacterized protein OS=Cavia porcellus<br>GN=ACO2 PE=4 SV=1              | CAVPO | 42  |
| 38 | 71.62 | 71.7 | 51.61 | 48.69 | 45.97 | tr H0UWJ0 H0UWJ0_CAVPO | Uncharacterized protein OS=Cavia porcellus<br>GN=TF PE=4 SV=1                | CAVPO | 36  |
| 39 | 71.49 | 71.5 | 76.17 | 72.81 | 72.81 | tr H0VBB2 H0VBB2_CAVPO | Uncharacterized protein OS=Cavia porcellus<br>GN=DPYSL3 PE=4 SV=1            | CAVPO | 60  |
| 40 | 71.06 | 71.1 | 65.14 | 61.04 | 59.93 | tr H0VKG1 H0VKG1_CAVPO | Uncharacterized protein (Fragment) OS=Cavia<br>porcellus GN=VCP PE=3 SV=1    | CAVPO | 41  |

|    |       |      |       |       |       |                        |                                                                              |       |    |
|----|-------|------|-------|-------|-------|------------------------|------------------------------------------------------------------------------|-------|----|
| 41 | 69.97 | 70   | 46.74 | 41.16 | 37.71 | tr H0UWT8 H0UWT8_CAVPO | Uncharacterized protein OS=Cavia porcellus<br>GN=CADPS PE=4 SV=1             | CAVPO | 37 |
| 42 | 69.94 | 70   | 78.95 | 77.99 | 72.73 | tr H0VYU4 H0VYU4_CAVPO | Phosphoglycerate kinase OS=Cavia porcellus<br>GN=PGK1 PE=3 SV=1              | CAVPO | 75 |
| 43 | 69.84 | 69.9 | 59.46 | 58.39 | 55.08 | tr H0VQ72 H0VQ72_CAVPO | Uncharacterized protein OS=Cavia porcellus<br>GN=MATR3 PE=4 SV=1             | CAVPO | 44 |
| 44 | 69.61 | 69.6 | 53.86 | 51.96 | 51.25 | tr H0WCW9 H0WCW9_CAVPO | Phosphorylase OS=Cavia porcellus GN=PYGB<br>PE=3 SV=1                        | CAVPO | 39 |
| 45 | 69.1  | 69.1 | 60.79 | 59.95 | 58.52 | tr H0V2D0 H0V2D0_CAVPO | Uncharacterized protein OS=Cavia porcellus<br>GN=HSPA4 PE=3 SV=1             | CAVPO | 40 |
| 46 | 67.73 | 67.7 | 72.84 | 68.62 | 62.94 | tr H0VDX5 H0VDX5_CAVPO | Uncharacterized protein OS=Cavia porcellus<br>GN=CCT3 PE=3 SV=1              | CAVPO | 40 |
| 47 | 67.49 | 67.9 | 41.27 | 36.24 | 31.28 | tr H0V178 H0V178_CAVPO | Uncharacterized protein OS=Cavia porcellus<br>GN=EPRS PE=3 SV=1              | CAVPO | 35 |
| 48 | 66.93 | 66.9 | 43.67 | 38.58 | 36.08 | tr H0UZ89 H0UZ89_CAVPO | Calcium-transporting ATPase OS=Cavia<br>porcellus GN=ATP2A2 PE=3 SV=1        | CAVPO | 35 |
| 49 | 66.64 | 66.7 | 64.51 | 63.52 | 60.86 | tr H0V1C3 H0V1C3_CAVPO | Uncharacterized protein OS=Cavia porcellus<br>GN=STXBP1 PE=4 SV=1            | CAVPO | 45 |
| 50 | 66.28 | 66.3 | 59.39 | 55.27 | 54.2  | tr H0VLM3 H0VLM3_CAVPO | Uncharacterized protein (Fragment) OS=Cavia<br>porcellus GN=HSPA5 PE=3 SV=1  | CAVPO | 45 |
| 51 | 65.87 | 65.9 | 62.39 | 60.88 | 59.7  | tr H0V0G1 H0V0G1_CAVPO | Uncharacterized protein OS=Cavia porcellus<br>GN=CANX PE=3 SV=1              | CAVPO | 43 |
| 52 | 65.41 | 65.5 | 42.46 | 40.61 | 35.09 | tr H0VFS4 H0VFS4_CAVPO | Uncharacterized protein OS=Cavia porcellus<br>GN=DDB1 PE=4 SV=1              | CAVPO | 37 |
| 53 | 63.94 | 63.9 | 54.21 | 50.93 | 48.71 | tr H0V823 H0V823_CAVPO | Uncharacterized protein (Fragment) OS=Cavia<br>porcellus GN=NPEPPS PE=4 SV=1 | CAVPO | 35 |
| 54 | 63.32 | 63.3 | 51    | 42.9  | 40.9  | tr H0VGF4 H0VGF4_CAVPO | Uncharacterized protein OS=Cavia porcellus<br>GN=AP2B1 PE=4 SV=1             | CAVPO | 35 |

|    |       |      |       |       |       |                        |                                                                               |       |    |
|----|-------|------|-------|-------|-------|------------------------|-------------------------------------------------------------------------------|-------|----|
| 55 | 63.2  | 63.2 | 46.74 | 42.8  | 41.3  | tr H0VIB5 H0VIB5_CAVPO | Uncharacterized protein OS=Cavia porcellus<br>GN=AP2A2 PE=4 SV=1              | CAVPO | 36 |
| 56 | 62.44 | 62.5 | 47.56 | 39.96 | 38.07 | tr H0UWB3 H0UWB3_CAVPO | Guanylate cyclase OS=Cavia porcellus<br>GN=GUCY2D PE=3 SV=1                   | CAVPO | 35 |
| 57 | 61.7  | 61.7 | 54.25 | 53.9  | 50.95 | tr H0VEJ3 H0VEJ3_CAVPO | Uncharacterized protein OS=Cavia porcellus<br>GN=LMNB2 PE=3 SV=1              | CAVPO | 36 |
| 58 | 61.64 | 61.6 | 52.8  | 49.44 | 47.57 | tr H0VK81 H0VK81_CAVPO | Uncharacterized protein OS=Cavia porcellus<br>GN=HNRNPU PE=4 SV=1             | CAVPO | 50 |
| 59 | 61.58 | 61.6 | 81.94 | 80.39 | 77.48 | tr H0W6W1 H0W6W1_CAVPO | Glucose-6-phosphate 1-dehydrogenase<br>OS=Cavia porcellus GN=G6PD PE=3 SV=1   | CAVPO | 39 |
| 60 | 61.52 | 61.5 | 63.21 | 59.32 | 57.21 | tr H0VLR3 H0VLR3_CAVPO | Uncharacterized protein OS=Cavia porcellus<br>GN=ATP6V1A PE=3 SV=1            | CAVPO | 37 |
| 61 | 61.42 | 61.5 | 46.84 | 44.19 | 39.65 | tr H0V6R2 H0V6R2_CAVPO | Uncharacterized protein (Fragment) OS=Cavia<br>porcellus GN=ATP6AP1 PE=4 SV=1 | CAVPO | 38 |
| 62 | 61.08 | 66.1 | 65.63 | 64.24 | 60.53 | tr H0V2J1 H0V2J1_CAVPO | Uncharacterized protein OS=Cavia porcellus<br>GN=Hspa8 PE=3 SV=1              | CAVPO | 73 |
| 63 | 60.66 | 60.7 | 52.22 | 49.36 | 47.64 | tr H0VTY8 H0VTY8_CAVPO | Uncharacterized protein (Fragment) OS=Cavia<br>porcellus GN=EEF2 PE=4 SV=1    | CAVPO | 37 |
| 64 | 60.25 | 60.4 | 32.7  | 25.1  | 14.78 | tr H0UZ34 H0UZ34_CAVPO | Uncharacterized protein OS=Cavia porcellus<br>GN=FLNA PE=4 SV=1               | CAVPO | 26 |
| 65 | 60.02 | 60.1 | 86.88 | 86.61 | 82.94 | tr H0VEV2 H0VEV2_CAVPO | Uncharacterized protein OS=Cavia porcellus<br>GN=CKB PE=3 SV=1                | CAVPO | 87 |
| 66 | 59.21 | 74.6 | 53.02 | 50.93 | 45.12 | tr H0UXF3 H0UXF3_CAVPO | Uncharacterized protein OS=Cavia porcellus<br>GN=PDE6A PE=4 SV=1              | CAVPO | 43 |
| 67 | 59.14 | 59.2 | 47.07 | 43.96 | 41.84 | tr H0VC90 H0VC90_CAVPO | Uncharacterized protein OS=Cavia porcellus<br>GN=HSP90B1 PE=3 SV=1            | CAVPO | 33 |
| 68 | 59.12 | 59.2 | 50.1  | 46.69 | 38.33 | tr H0UYE7 H0UYE7_CAVPO | Alanine--tRNA ligase, cytoplasmic OS=Cavia<br>porcellus GN=AARS PE=3 SV=1     | CAVPO | 31 |

|    |       |      |       |       |       |                        |                                                                                |       |    |
|----|-------|------|-------|-------|-------|------------------------|--------------------------------------------------------------------------------|-------|----|
| 69 | 59.12 | 59.2 | 50.1  | 46.69 | 38.33 | tr H0UYE7 H0UYE7_CAVPO | Alanine--tRNA ligase, cytoplasmic OS=Cavia porcellus GN=AARS PE=3 SV=1         | CAVPO | 31 |
| 70 | 59.04 | 59.1 | 90.83 | 81.66 | 77.51 | tr H0VKB0 H0VKB0_CAVPO | L-lactate dehydrogenase (Fragment) OS=Cavia porcellus GN=LDHA PE=3 SV=1        | CAVPO | 78 |
| 71 | 58.86 | 58.9 | 80    | 78.4  | 75.47 | tr H0VKP1 H0VKP1_CAVPO | Uncharacterized protein OS=Cavia porcellus GN=ACTG1 PE=3 SV=1                  | CAVPO | 86 |
| 72 | 58.18 | 58.2 | 65.11 | 63.31 | 60.25 | tr H0UWR7 H0UWR7_CAVPO | T-complex protein 1 subunit alpha OS=Cavia porcellus GN=LOC100714101 PE=3 SV=1 | CAVPO | 34 |
| 73 | 57.72 | 57.9 | 28.84 | 22.46 | 16.12 | tr H0WA32 H0WA32_CAVPO | Uncharacterized protein OS=Cavia porcellus GN=TPR PE=4 SV=1                    | CAVPO | 30 |
| 74 | 57.67 | 58.3 | 64.36 | 63.09 | 60.73 | tr H0VEJ5 H0VEJ5_CAVPO | Uncharacterized protein (Fragment) OS=Cavia porcellus GN=CCT8 PE=3 SV=1        | CAVPO | 34 |
| 75 | 57.34 | 68   | 52.41 | 45.12 | 42.19 | tr H0V733 H0V733_CAVPO | Phosphorylase OS=Cavia porcellus GN=PYGL PE=3 SV=1                             | CAVPO | 37 |
| 76 | 57.19 | 57.4 | 49.8  | 42.65 | 42.51 | tr H0VEI7 H0VEI7_CAVPO | Uncharacterized protein (Fragment) OS=Cavia porcellus GN=Nsf PE=3 SV=1         | CAVPO | 36 |
| 77 | 57.16 | 57.2 | 43.55 | 43.55 | 42.49 | tr H0V3P6 H0V3P6_CAVPO | Uncharacterized protein (Fragment) OS=Cavia porcellus GN=NCAM1 PE=4 SV=1       | CAVPO | 42 |
| 78 | 56.97 | 61.3 | 57.38 | 53.18 | 49.46 | tr H0V8F4 H0V8F4_CAVPO | Uncharacterized protein (Fragment) OS=Cavia porcellus GN=HSPA4L PE=3 SV=1      | CAVPO | 37 |
| 79 | 56.36 | 56.5 | 43.09 | 37.31 | 33.57 | tr H0VM20 H0VM20_CAVPO | Uncharacterized protein OS=Cavia porcellus GN=DCTN1 PE=4 SV=1                  | CAVPO | 32 |
| 80 | 56.33 | 56.4 | 43.2  | 40.91 | 37.8  | tr H0V1E2 H0V1E2_CAVPO | Uncharacterized protein OS=Cavia porcellus GN=GANAB PE=4 SV=1                  | CAVPO | 32 |
| 81 | 56.18 | 56.2 | 51.52 | 48.23 | 46.59 | tr H0UW67 H0UW67_CAVPO | 6-phosphofructokinase OS=Cavia porcellus GN=PFKP PE=3 SV=1                     | CAVPO | 34 |
| 82 | 56.09 | 56.6 | 58.41 | 56.56 | 55.08 | tr H0UXK6 H0UXK6_CAVPO | Uncharacterized protein OS=Cavia porcellus GN=CCT5 PE=3 SV=1                   | CAVPO | 31 |

|    |       |      |       |       |       |                        |                                                                             |       |    |
|----|-------|------|-------|-------|-------|------------------------|-----------------------------------------------------------------------------|-------|----|
| 83 | 55.95 | 66.5 | 44.74 | 40.09 | 38.77 | tr H0V335 H0V335_CAVPO | Uncharacterized protein OS=Cavia porcellus<br>GN=EPB41L3 PE=4 SV=1          | CAVPO | 38 |
| 84 | 55.83 | 55.9 | 66.33 | 65.49 | 55.11 | tr H0UT42 H0UT42_CAVPO | Uncharacterized protein (Fragment) OS=Cavia<br>porcellus GN=TKT PE=4 SV=1   | CAVPO | 38 |
| 85 | 55.36 | 57.4 | 65.61 | 54.99 | 54.99 | tr H0VNL4 H0VNL4_CAVPO | Uncharacterized protein (Fragment) OS=Cavia<br>porcellus GN=LMNB1 PE=3 SV=1 | CAVPO | 41 |
| 86 | 55.12 | 55.3 | 34.67 | 32.46 | 27.46 | tr H0VTK1 H0VTK1_CAVPO | Calcium-transporting ATPase OS=Cavia<br>porcellus GN=ATP2B1 PE=3 SV=1       | CAVPO | 28 |
| 87 | 55.06 | 55.1 | 67.33 | 65.54 | 65.54 | tr H0VBS1 H0VBS1_CAVPO | Protein disulfide-isomerase OS=Cavia<br>porcellus GN=PDIA3 PE=3 SV=1        | CAVPO | 35 |
| 88 | 54.8  | 54.9 | 56.99 | 53.41 | 51.97 | tr H0VCM3 H0VCM3_CAVPO | Glucose-6-phosphate isomerase OS=Cavia<br>porcellus GN=GPI PE=3 SV=1        | CAVPO | 59 |
| 89 | 54.63 | 54.7 | 66.17 | 62.8  | 59.25 | tr H0VMF2 H0VMF2_CAVPO | Uncharacterized protein (Fragment) OS=Cavia<br>porcellus GN=CCT2 PE=3 SV=1  | CAVPO | 28 |
| 90 | 54.33 | 54.4 | 47.74 | 46.5  | 45.13 | tr H0VK01 H0VK01_CAVPO | Uncharacterized protein (Fragment) OS=Cavia<br>porcellus GN=DDX17 PE=3 SV=1 | CAVPO | 33 |
| 91 | 53.78 | 53.8 | 43.11 | 38.81 | 32.45 | tr H0V0P6 H0V0P6_CAVPO | Uncharacterized protein OS=Cavia porcellus<br>GN=OGDH PE=4 SV=1             | CAVPO | 29 |
| 92 | 53.3  | 53.7 | 26.67 | 21.93 | 16.97 | tr H0VB36 H0VB36_CAVPO | Uncharacterized protein (Fragment) OS=Cavia<br>porcellus GN=MYO5A PE=4 SV=1 | CAVPO | 27 |
| 93 | 52.77 | 52.8 | 64.22 | 58.76 | 57.44 | tr H0VZD9 H0VZD9_CAVPO | ATP synthase subunit beta OS=Cavia porcellus<br>GN=ATP5B PE=3 SV=1          | CAVPO | 58 |
| 94 | 52.24 | 52.3 | 67.78 | 65.03 | 60.51 | tr H0VL04 H0VL04_CAVPO | Protein disulfide-isomerase OS=Cavia<br>porcellus GN=P4HB PE=3 SV=1         | CAVPO | 31 |
| 95 | 52.13 | 52.2 | 36.91 | 34.44 | 25.41 | tr H0VEF4 H0VEF4_CAVPO | Uncharacterized protein (Fragment) OS=Cavia<br>porcellus GN=SF3B1 PE=4 SV=1 | CAVPO | 28 |
| 96 | 51.73 | 51.7 | 47.79 | 46.69 | 45.72 | tr H0V5Q8 H0V5Q8_CAVPO | Uncharacterized protein OS=Cavia porcellus<br>GN=NDUFS1 PE=4 SV=1           | CAVPO | 28 |

|     |       |      |       |       |       |                        |                                                                                     |       |    |
|-----|-------|------|-------|-------|-------|------------------------|-------------------------------------------------------------------------------------|-------|----|
| 97  | 51.61 | 54   | 31.68 | 24.42 | 16.63 | tr H0W917 H0W917_CAVPO | Uncharacterized protein (Fragment) OS=Cavia porcellus GN=MAP1A PE=4 SV=1            | CAVPO | 25 |
| 98  | 51.42 | 51.4 | 38.85 | 28.44 | 27.58 | tr H0V943 H0V943_CAVPO | Uncharacterized protein OS=Cavia porcellus GN=MYO6 PE=4 SV=1                        | CAVPO | 30 |
| 99  | 50.52 | 50.6 | 78.82 | 77.35 | 74.41 | tr A9LS48 A9LS48_CAVPO | Beta-transducin OS=Cavia porcellus GN=Gnb1 PE=2 SV=1                                | CAVPO | 71 |
| 100 | 50.41 | 50.4 | 40.7  | 37.96 | 33.46 | tr H0VD65 H0VD65_CAVPO | Uncharacterized protein OS=Cavia porcellus GN=CNTN1 PE=4 SV=1                       | CAVPO | 27 |
| 101 | 49.77 | 49.8 | 68.4  | 68.2  | 55.4  | tr H0V3J6 H0V3J6_CAVPO | Uncharacterized protein OS=Cavia porcellus GN=DARS PE=3 SV=1                        | CAVPO | 25 |
| 102 | 49.69 | 49.7 | 40.45 | 34.64 | 34.64 | tr H0VPE3 H0VPE3_CAVPO | Uncharacterized protein (Fragment) OS=Cavia porcellus GN=ILF3 PE=4 SV=1             | CAVPO | 28 |
| 103 | 49.64 | 49.7 | 35.74 | 31.04 | 25.2  | tr H0VEX7 H0VEX7_CAVPO | Structural maintenance of chromosomes protein OS=Cavia porcellus GN=SMC1A PE=3 SV=1 | CAVPO | 26 |
| 104 | 49.6  | 49.7 | 41.08 | 32.46 | 25.88 | tr H0VDK8 H0VDK8_CAVPO | Uncharacterized protein OS=Cavia porcellus GN=SMC3 PE=4 SV=1                        | CAVPO | 25 |
| 105 | 49.54 | 49.6 | 53.45 | 53.09 | 50.36 | tr H0VM26 H0VM26_CAVPO | ATP synthase subunit alpha OS=Cavia porcellus GN=ATP5A1 PE=3 SV=1                   | CAVPO | 38 |
| 106 | 49.51 | 50.1 | 41.39 | 40.36 | 39.57 | tr H0V0D8 H0V0D8_CAVPO | Uncharacterized protein OS=Cavia porcellus GN=PDCD6IP PE=4 SV=1                     | CAVPO | 26 |
| 107 | 49.31 | 62.3 | 33.12 | 28.05 | 19.1  | tr H0UY16 H0UY16_CAVPO | Uncharacterized protein (Fragment) OS=Cavia porcellus GN=MYH14 PE=4 SV=1            | CAVPO | 31 |
| 108 | 49.3  | 49.3 | 61.21 | 61.03 | 59.61 | tr H0VCN9 H0VCN9_CAVPO | Uncharacterized protein (Fragment) OS=Cavia porcellus PE=4 SV=1                     | CAVPO | 32 |
| 109 | 49.16 | 56.3 | 63.99 | 59.62 | 57.87 | tr H0VF18 H0VF18_CAVPO | Uncharacterized protein OS=Cavia porcellus GN=CRMP1 PE=4 SV=1                       | CAVPO | 42 |
| 110 | 48.73 | 49   | 60.92 | 55.6  | 51.15 | tr H0W1Z7 H0W1Z7_CAVPO | Uncharacterized protein OS=Cavia porcellus                                          | CAVPO | 33 |



|     |       |      |       |       |       |                        |                                                                                                               |       |    |
|-----|-------|------|-------|-------|-------|------------------------|---------------------------------------------------------------------------------------------------------------|-------|----|
|     |       |      |       |       |       |                        | GN=HSPD1 PE=3 SV=1                                                                                            |       |    |
| 111 | 48.57 | 80.9 | 49.61 | 46.19 | 44.63 | tr B3SI06 B3SI06_CAVPO | Sodium/potassium-ATPase alpha-subunit<br>isoform 1 splice-variant a OS=Cavia porcellus<br>GN=atp1a1 PE=2 SV=2 | CAVPO | 53 |
| 112 | 48.44 | 48.6 | 31.9  | 28.03 | 20    | tr H0UTE6 H0UTE6_CAVPO | Uncharacterized protein OS=Cavia porcellus<br>GN=LRPPRC PE=4 SV=1                                             | CAVPO | 25 |
| 113 | 48.3  | 48.3 | 73.12 | 67.55 | 66.1  | tr H0VCS7 H0VCS7_CAVPO | Aspartate aminotransferase OS=Cavia<br>porcellus GN=GOT1 PE=3 SV=1                                            | CAVPO | 30 |
| 114 | 48.21 | 56.2 | 30.48 | 21.56 | 15.43 | tr H0W0A9 H0W0A9_CAVPO | Uncharacterized protein (Fragment) OS=Cavia<br>porcellus GN=SPTB PE=4 SV=1                                    | CAVPO | 28 |
| 115 | 48.08 | 52.4 | 52.5  | 46.68 | 39.7  | tr H0V9N5 H0V9N5_CAVPO | Uncharacterized protein OS=Cavia porcellus<br>GN=EPB41 PE=4 SV=1                                              | CAVPO | 28 |
| 116 | 48.01 | 48.1 | 44.23 | 36.51 | 33.8  | tr H0V7T7 H0V7T7_CAVPO | Uncharacterized protein OS=Cavia porcellus<br>GN=HYOU1 PE=3 SV=1                                              | CAVPO | 28 |
| 117 | 47.93 | 48   | 53.59 | 49.56 | 47.99 | tr H0V7E1 H0V7E1_CAVPO | Inosine-5'-monophosphate dehydrogenase<br>OS=Cavia porcellus GN=IMPDH1 PE=3 SV=1                              | CAVPO | 28 |
| 118 | 47.89 | 47.9 | 54.99 | 52.45 | 49.58 | tr H0VSR9 H0VSR9_CAVPO | Uncharacterized protein (Fragment) OS=Cavia<br>porcellus PE=4 SV=1                                            | CAVPO | 31 |
| 119 | 47.87 | 49.7 | 76.61 | 66.14 | 63    | tr H0VS82 H0VS82_CAVPO | Uncharacterized protein OS=Cavia porcellus<br>GN=DPYSL4 PE=4 SV=1                                             | CAVPO | 36 |
| 120 | 47.81 | 47.9 | 37.98 | 30.66 | 27.76 | tr H0V2B7 H0V2B7_CAVPO | Uncharacterized protein OS=Cavia porcellus<br>GN=GTF2I PE=4 SV=1                                              | CAVPO | 25 |
| 121 | 47.53 | 47.6 | 55.24 | 50.23 | 43.82 | tr H0VFG8 H0VFG8_CAVPO | Uncharacterized protein (Fragment) OS=Cavia<br>porcellus GN=DDX1 PE=4 SV=1                                    | CAVPO | 25 |
| 122 | 47.41 | 48.5 | 43.03 | 35.51 | 29.18 | tr H0VTU7 H0VTU7_CAVPO | Uncharacterized protein OS=Cavia porcellus<br>GN=Parp1 PE=4 SV=1                                              | CAVPO | 25 |
| 123 | 47.22 | 47.3 | 44.04 | 35.74 | 33.66 | tr H0VBZ6 H0VBZ6_CAVPO | Uncharacterized protein (Fragment) OS=Cavia<br>porcellus GN=KIF5B PE=4 SV=1                                   | CAVPO | 25 |

|     |       |      |       |       |       |                        |                                                                                |       |    |
|-----|-------|------|-------|-------|-------|------------------------|--------------------------------------------------------------------------------|-------|----|
| 124 | 46.92 | 47   | 64.77 | 64.58 | 58.12 | tr H0UWY1 H0UWY1_CAVPO | Uncharacterized protein OS=Cavia porcellus<br>GN=ATP6V1B2 PE=3 SV=1            | CAVPO | 28 |
| 125 | 46.4  | 46.4 | 70.5  | 68.82 | 68.59 | tr H0UUR0 H0UUR0_CAVPO | Uncharacterized protein OS=Cavia porcellus<br>GN=CALR PE=3 SV=1                | CAVPO | 32 |
| 126 | 46.16 | 46.2 | 59.11 | 58.21 | 55.89 | tr H0VBV7 H0VBV7_CAVPO | Uncharacterized protein OS=Cavia porcellus<br>GN=DPYSL5 PE=4 SV=1              | CAVPO | 28 |
| 127 | 46.04 | 46.1 | 22.06 | 16.12 | 12.66 | tr H0VF88 H0VF88_CAVPO | Uncharacterized protein OS=Cavia porcellus<br>GN=SRRM2 PE=4 SV=1               | CAVPO | 24 |
| 128 | 45.85 | 45.9 | 51.39 | 46.21 | 43.99 | tr H0UZM9 H0UZM9_CAVPO | Uncharacterized protein (Fragment) OS=Cavia<br>porcellus GN=STIP1 PE=4 SV=1    | CAVPO | 29 |
| 129 | 45.68 | 45.7 | 31.21 | 31.21 | 27.97 | tr H0VSJ5 H0VSJ5_CAVPO | Uncharacterized protein (Fragment) OS=Cavia<br>porcellus GN=SLC12A5 PE=4 SV=1  | CAVPO | 23 |
| 130 | 45.34 | 45.4 | 44.58 | 44.58 | 40.42 | tr H0VRX2 H0VRX2_CAVPO | Uncharacterized protein (Fragment) OS=Cavia<br>porcellus GN=SLC25A12 PE=3 SV=1 | CAVPO | 25 |
| 131 | 45.25 | 53.4 | 44.42 | 38.02 | 33.49 | tr H0V2T6 H0V2T6_CAVPO | Uncharacterized protein (Fragment) OS=Cavia<br>porcellus GN=PDE6C PE=4 SV=1    | CAVPO | 31 |
| 132 | 45.07 | 45.1 | 30.68 | 24.91 | 24.91 | tr H0W5M5 H0W5M5_CAVPO | Uncharacterized protein OS=Cavia porcellus<br>GN=ACIN1 PE=4 SV=1               | CAVPO | 26 |
| 133 | 45.03 | 45.1 | 47.46 | 44.03 | 40.92 | tr H0VF40 H0VF40_CAVPO | Uncharacterized protein OS=Cavia porcellus<br>GN=Hnrnpr PE=4 SV=1              | CAVPO | 25 |
| 134 | 44.92 | 44.9 | 77.19 | 74.74 | 70.88 | tr H0VL82 H0VL82_CAVPO | Triosephosphate isomerase OS=Cavia<br>porcellus GN=TPI1 PE=3 SV=1              | CAVPO | 75 |
| 135 | 44.85 | 44.9 | 43.66 | 40.08 | 38.28 | tr H0UZN6 H0UZN6_CAVPO | Uncharacterized protein (Fragment) OS=Cavia<br>porcellus GN=CTNNB1 PE=4 SV=1   | CAVPO | 23 |
| 136 | 44.61 | 44.6 | 51.24 | 45.39 | 44.33 | tr H0VNV0 H0VNV0_CAVPO | Uncharacterized protein OS=Cavia porcellus<br>GN=GRK1 PE=3 SV=1                | CAVPO | 25 |
| 137 | 44.5  | 44.8 | 35.13 | 30.15 | 22.88 | tr H0VS53 H0VS53_CAVPO | Coatomer subunit alpha OS=Cavia porcellus<br>GN=COPA PE=3 SV=1                 | CAVPO | 22 |

|     |       |      |       |       |       |                        |                                                                                                                     |       |    |
|-----|-------|------|-------|-------|-------|------------------------|---------------------------------------------------------------------------------------------------------------------|-------|----|
| 138 | 43.43 | 43.4 | 58.57 | 57.66 | 52.35 | tr H0W6C9 H0W6C9_CAVPO | Uncharacterized protein OS=Cavia porcellus<br>GN=Fam169a PE=4 SV=1                                                  | CAVPO | 41 |
| 139 | 43.21 | 43.2 | 69.68 | 69.44 | 68.06 | tr H0VE02 H0VE02_CAVPO | Aspartate aminotransferase OS=Cavia<br>porcellus GN=GOT2 PE=3 SV=1                                                  | CAVPO | 39 |
| 140 | 43.15 | 43.2 | 50.88 | 45.58 | 41.74 | tr H0UYD9 H0UYD9_CAVPO | Uncharacterized protein OS=Cavia porcellus<br>GN=HSPA9 PE=3 SV=1                                                    | CAVPO | 35 |
| 141 | 42.77 | 42.8 | 59.74 | 56.39 | 45.21 | tr H0V4S0 H0V4S0_CAVPO | Uncharacterized protein OS=Cavia porcellus<br>GN=KHSRP PE=4 SV=1                                                    | CAVPO | 30 |
| 142 | 42.35 | 42.4 | 52.41 | 49.31 | 48.28 | tr H0VZZ5 H0VZZ5_CAVPO | Uncharacterized protein OS=Cavia porcellus<br>GN=PGM1 PE=3 SV=1                                                     | CAVPO | 27 |
| 143 | 42.13 | 42.2 | 40.38 | 36.6  | 27.17 | tr H0V7U8 H0V7U8_CAVPO | Uncharacterized protein OS=Cavia porcellus<br>GN=DHX15 PE=4 SV=1                                                    | CAVPO | 21 |
| 144 | 42.09 | 42.1 | 54.5  | 50.08 | 47.3  | tr H0VMU9 H0VMU9_CAVPO | Leukotriene A(4) hydrolase OS=Cavia<br>porcellus GN=Lta4h PE=3 SV=1                                                 | CAVPO | 25 |
| 145 | 41.93 | 42   | 55.29 | 53.62 | 52.32 | tr H0W4A6 H0W4A6_CAVPO | Uncharacterized protein (Fragment) OS=Cavia<br>porcellus GN=CCT7 PE=3 SV=1                                          | CAVPO | 25 |
| 146 | 41.88 | 41.9 | 44.41 | 38.51 | 38.51 | tr H0V2B9 H0V2B9_CAVPO | Protein disulfide-isomerase A4 OS=Cavia<br>porcellus GN=PDIA4 PE=3 SV=1                                             | CAVPO | 25 |
| 147 | 41.83 | 41.9 | 34.98 | 32.45 | 29.45 | tr H0VJ49 H0VJ49_CAVPO | Uncharacterized protein OS=Cavia porcellus<br>GN=ATP6V0A1 PE=4 SV=1                                                 | CAVPO | 23 |
| 148 | 41.66 | 54.3 | 66.08 | 65.2  | 63.09 | tr H0W639 H0W639_CAVPO | Uncharacterized protein OS=Cavia porcellus<br>GN=DPYSL2 PE=4 SV=1                                                   | CAVPO | 53 |
| 149 | 41.62 | 41.7 | 55.85 | 50.25 | 47.28 | tr H0V2D5 H0V2D5_CAVPO | Dolichyl-diphosphooligosaccharide--protein<br>glycosyltransferase subunit 1 OS=Cavia<br>porcellus GN=RPN1 PE=3 SV=1 | CAVPO | 25 |
| 150 | 41.49 | 41.6 | 46.59 | 40.4  | 27.49 | tr H0VSV2 H0VSV2_CAVPO | Coatomer subunit beta OS=Cavia porcellus<br>GN=COPB1 PE=3 SV=1                                                      | CAVPO | 20 |
| 151 | 41.21 | 41.3 | 39.38 | 36.87 | 30.59 | tr H0V830 H0V830_CAVPO | Uncharacterized protein OS=Cavia porcellus                                                                          | CAVPO | 21 |

|     |       |      |       |       |       |                        |                                                                                |       |    |
|-----|-------|------|-------|-------|-------|------------------------|--------------------------------------------------------------------------------|-------|----|
|     |       |      |       |       |       |                        | GN=KPNB1 PE=4 SV=1                                                             |       |    |
| 152 | 41.18 | 41.3 | 48.29 | 41.21 | 40.16 | tr H0V6P1 H0V6P1_CAVPO | Uncharacterized protein OS=Cavia porcellus<br>GN=HADHA PE=3 SV=1               | CAVPO | 22 |
| 153 | 41.18 | 60.7 | 87.09 | 85.44 | 81.04 | tr H0VA39 H0VA39_CAVPO | Uncharacterized protein OS=Cavia porcellus<br>GN=ALDOA PE=3 SV=1               | CAVPO | 85 |
| 154 | 41.16 | 41.6 | 36.71 | 28.24 | 23.69 | tr H0VRS6 H0VRS6_CAVPO | Uncharacterized protein OS=Cavia porcellus<br>PE=4 SV=1                        | CAVPO | 23 |
| 155 | 40.85 | 40.9 | 53.69 | 52.96 | 51.48 | tr H0V7W3 H0V7W3_CAVPO | Uncharacterized protein OS=Cavia porcellus<br>GN=EIF4A3 PE=3 SV=1              | CAVPO | 24 |
| 156 | 40.59 | 40.7 | 51.94 | 46.83 | 39.44 | tr H0UUL3 H0UUL3_CAVPO | Uncharacterized protein (Fragment) OS=Cavia<br>porcellus GN=HNRNPUL2 PE=4 SV=1 | CAVPO | 22 |
| 157 | 40.43 | 40.5 | 76.68 | 71.85 | 68.9  | tr H0VEQ9 H0VEQ9_CAVPO | Glutamine synthetase OS=Cavia porcellus<br>GN=GLUL PE=3 SV=1                   | CAVPO | 68 |
| 158 | 40.38 | 40.5 | 36.08 | 28.28 | 25.18 | tr H0VY86 H0VY86_CAVPO | Uncharacterized protein OS=Cavia porcellus<br>GN=UPF1 PE=4 SV=1                | CAVPO | 23 |
| 159 | 40.28 | 54.8 | 45.26 | 44.06 | 35.01 | tr H0VE10 H0VE10_CAVPO | Uncharacterized protein OS=Cavia porcellus<br>GN=HK2 PE=3 SV=1                 | CAVPO | 28 |
| 160 | 40.24 | 40.3 | 74    | 72    | 68.29 | tr A9LS49 A9LS49_CAVPO | Alpha-transducin OS=Cavia porcellus<br>GN=Gnat1 PE=2 SV=1                      | CAVPO | 50 |
| 161 | 40.23 | 40.3 | 35.83 | 29.9  | 29.56 | tr H0VE17 H0VE17_CAVPO | Uncharacterized protein (Fragment) OS=Cavia<br>porcellus GN=PSMD2 PE=4 SV=1    | CAVPO | 20 |
| 162 | 40.08 | 40.2 | 31.82 | 27.27 | 22.81 | tr H0UU89 H0UU89_CAVPO | Uncharacterized protein OS=Cavia porcellus<br>GN=SF3B3 PE=4 SV=1               | CAVPO | 20 |
| 163 | 40.07 | 40.3 | 57.25 | 54.24 | 53.11 | tr H0V927 H0V927_CAVPO | Uncharacterized protein OS=Cavia porcellus<br>GN=CCT6A PE=3 SV=1               | CAVPO | 25 |
| 164 | 39.76 | 39.9 | 46.68 | 44.55 | 43.84 | tr H0UXN2 H0UXN2_CAVPO | Uncharacterized protein OS=Cavia porcellus<br>GN=SYT1 PE=4 SV=1                | CAVPO | 22 |

|     |       |      |       |       |       |                        |                                                                                    |       |    |
|-----|-------|------|-------|-------|-------|------------------------|------------------------------------------------------------------------------------|-------|----|
| 165 | 39.72 | 39.8 | 59.31 | 59.31 | 56.28 | tr H0V2B3 H0V2B3_CAVPO | Elongation factor 1-alpha OS=Cavia porcellus<br>GN=EEF1A1 PE=3 SV=1                | CAVPO | 29 |
| 166 | 39.67 | 43.7 | 54.17 | 51.95 | 45.64 | tr H0UXQ5 H0UXQ5_CAVPO | T-complex protein 1 subunit delta OS=Cavia<br>porcellus GN=CCT4 PE=3 SV=1          | CAVPO | 24 |
| 167 | 39.47 | 50.6 | 52.85 | 49.31 | 49.31 | tr H0WBX1 H0WBX1_CAVPO | Uncharacterized protein (Fragment) OS=Cavia<br>porcellus GN=LOC100717205 PE=3 SV=1 | CAVPO | 35 |
| 168 | 39.42 | 39.5 | 62.11 | 61.26 | 59.37 | tr H0V3G6 H0V3G6_CAVPO | Uncharacterized protein OS=Cavia porcellus<br>GN=Cndp2 PE=4 SV=1                   | CAVPO | 22 |
| 169 | 39.38 | 41.5 | 54.33 | 48.69 | 47.08 | tr H0W9M5 H0W9M5_CAVPO | Uncharacterized protein OS=Cavia porcellus<br>GN=Nefl PE=3 SV=1                    | CAVPO | 27 |
| 170 | 39.05 | 39.1 | 46.91 | 46.68 | 46.45 | tr H0WBQ8 H0WBQ8_CAVPO | Uncharacterized protein OS=Cavia porcellus<br>GN=EEF1G PE=4 SV=1                   | CAVPO | 24 |
| 171 | 38.97 | 39.1 | 33.64 | 28.57 | 23.78 | tr H0VJP8 H0VJP8_CAVPO | Uncharacterized protein OS=Cavia porcellus<br>GN=AP3B2 PE=4 SV=1                   | CAVPO | 22 |
| 172 | 38.89 | 39.5 | 68.2  | 58.6  | 55    | tr H0UTG9 H0UTG9_CAVPO | Uncharacterized protein OS=Cavia porcellus<br>GN=ABAT PE=3 SV=1                    | CAVPO | 23 |
| 173 | 38.86 | 39   | 40.83 | 36.56 | 29.65 | tr H0V1N2 H0V1N2_CAVPO | Uncharacterized protein (Fragment) OS=Cavia<br>porcellus GN=VPS35 PE=4 SV=1        | CAVPO | 20 |
| 174 | 38.72 | 40.9 | 36.23 | 32.71 | 29.19 | tr H0VBK1 H0VBK1_CAVPO | Uncharacterized protein OS=Cavia porcellus<br>GN=Hnrnpul1 PE=4 SV=1                | CAVPO | 21 |
| 175 | 38.67 | 78.2 | 64.8  | 62.79 | 59.48 | tr H0V1W9 H0V1W9_CAVPO | Uncharacterized protein OS=Cavia porcellus<br>GN=HSP90AB1 PE=3 SV=1                | CAVPO | 55 |
| 176 | 38.53 | 40.1 | 66.45 | 61.79 | 58.14 | tr H0VE35 H0VE35_CAVPO | Uncharacterized protein (Fragment) OS=Cavia<br>porcellus GN=SLC25A5 PE=3 SV=1      | CAVPO | 36 |
| 177 | 38.49 | 39   | 41.31 | 32.88 | 27.47 | tr H0VI49 H0VI49_CAVPO | Uncharacterized protein OS=Cavia porcellus<br>GN=SART3 PE=4 SV=1                   | CAVPO | 21 |
| 178 | 38.43 | 38.5 | 42.82 | 40.79 | 32.66 | tr H0VL76 H0VL76_CAVPO | Ubiquitin carboxyl-terminal hydrolase<br>OS=Cavia porcellus GN=USP5 PE=3 SV=1      | CAVPO | 22 |

|     |       |      |       |       |       |                        |                                                                              |       |    |
|-----|-------|------|-------|-------|-------|------------------------|------------------------------------------------------------------------------|-------|----|
| 179 | 38.35 | 44.1 | 43.71 | 38.31 | 32.9  | tr H0VC58 H0VC58_CAVPO | 6-phosphofructokinase OS=Cavia porcellus<br>GN=PFKM PE=3 SV=1                | CAVPO | 23 |
| 180 | 38.28 | 40   | 65.49 | 58.41 | 58.41 | tr H0VH39 H0VH39_CAVPO | Elongation factor Tu OS=Cavia porcellus<br>GN=TUFM PE=3 SV=1                 | CAVPO | 21 |
| 181 | 38.26 | 38.3 | 49.91 | 46.04 | 44.75 | tr H0V4U2 H0V4U2_CAVPO | Glutamate dehydrogenase OS=Cavia porcellus<br>PE=3 SV=1                      | CAVPO | 24 |
| 182 | 38.24 | 38.3 | 23.48 | 17.98 | 12.22 | tr H0VCI4 H0VCI4_CAVPO | Uncharacterized protein (Fragment) OS=Cavia<br>porcellus GN=CHD4 PE=4 SV=1   | CAVPO | 18 |
| 183 | 38.06 | 38.3 | 41.77 | 35.8  | 24.49 | tr H0VH65 H0VH65_CAVPO | Uncharacterized protein OS=Cavia porcellus<br>GN=EFTUD2 PE=4 SV=1            | CAVPO | 18 |
| 184 | 37.91 | 38   | 59.02 | 56.12 | 55.01 | tr H0UWB2 H0UWB2_CAVPO | Uncharacterized protein OS=Cavia porcellus<br>GN=HNRNPH1 PE=4 SV=1           | CAVPO | 25 |
| 185 | 37.77 | 56   | 75.28 | 74.83 | 70.56 | tr H0VNS2 H0VNS2_CAVPO | Uncharacterized protein OS=Cavia porcellus<br>GN=GDI2 PE=4 SV=1              | CAVPO | 35 |
| 186 | 37.66 | 37.8 | 41.32 | 26.89 | 20.28 | tr H0V7M6 H0V7M6_CAVPO | Uncharacterized protein OS=Cavia porcellus<br>GN=SUGP2 PE=4 SV=1             | CAVPO | 18 |
| 187 | 37.43 | 37.5 | 58.45 | 57    | 51.93 | tr H0VP28 H0VP28_CAVPO | Isocitrate dehydrogenase [NADP] OS=Cavia<br>porcellus GN=IDH1 PE=3 SV=1      | NADP  | 19 |
| 188 | 37.39 | 39.2 | 12.6  | 10.14 | 4.543 | tr H0V4J4 H0V4J4_CAVPO | Uncharacterized protein OS=Cavia porcellus<br>GN=HUWE1 PE=4 SV=1             | CAVPO | 17 |
| 189 | 37.34 | 37.4 | 46.14 | 44.55 | 42.97 | tr H0VR32 H0VR32_CAVPO | tRNA-splicing ligase RtcB homolog OS=Cavia<br>porcellus GN=RTCB PE=3 SV=1    | CAVPO | 20 |
| 190 | 37.32 | 37.4 | 54.35 | 46.74 | 39.49 | tr H0VUK3 H0VUK3_CAVPO | Uncharacterized protein OS=Cavia porcellus<br>GN=MPP2 PE=4 SV=1              | CAVPO | 23 |
| 191 | 37.31 | 37.3 | 29.75 | 29.75 | 25.93 | tr H0UWU9 H0UWU9_CAVPO | Uncharacterized protein (Fragment) OS=Cavia<br>porcellus GN=SNAP91 PE=4 SV=1 | CAVPO | 22 |
| 192 | 37.27 | 37.4 | 61.72 | 54.95 | 47.19 | tr Q8R4Z8 Q8R4Z8_CAVPO | WD repeat1 protein OS=Cavia porcellus PE=2<br>SV=1                           | CAVPO | 19 |

|     |       |      |       |       |       |                        |                                                                           |       |    |
|-----|-------|------|-------|-------|-------|------------------------|---------------------------------------------------------------------------|-------|----|
| 193 | 37.18 | 37.2 | 49.83 | 44.58 | 41.96 | tr H0VMJ6 H0VMJ6_CAVPO | Uncharacterized protein (Fragment) OS=Cavia porcellus GN=PABPC3 PE=4 SV=1 | CAVPO | 24 |
| 194 | 36.98 | 42.7 | 56.35 | 51.8  | 46.76 | tr H0UX23 H0UX23_CAVPO | Uncharacterized protein OS=Cavia porcellus GN=Ckmt1a PE=3 SV=1            | CAVPO | 41 |
| 195 | 36.72 | 36.7 | 63.57 | 60.63 | 60.63 | tr H0VSD7 H0VSD7_CAVPO | Uncharacterized protein (Fragment) OS=Cavia porcellus GN=SFPQ PE=4 SV=1   | CAVPO | 25 |
| 196 | 36.67 | 36.8 | 54.4  | 47.2  | 47.2  | tr H0WCA5 H0WCA5_CAVPO | Uncharacterized protein (Fragment) OS=Cavia porcellus GN=CKAP4 PE=4 SV=1  | CAVPO | 21 |
| 197 | 36.64 | 36.7 | 54.94 | 50.84 | 43.86 | tr H0V0M5 H0V0M5_CAVPO | Uncharacterized protein OS=Cavia porcellus GN=Ssb PE=4 SV=1               | CAVPO | 23 |
| 198 | 36.6  | 37.1 | 52.84 | 38.12 | 37.06 | tr H0VF09 H0VF09_CAVPO | Uncharacterized protein OS=Cavia porcellus GN=YARS PE=4 SV=1              | CAVPO | 19 |
| 199 | 36.54 | 36.6 | 55.53 | 55.29 | 53.18 | tr H0UYB6 H0UYB6_CAVPO | Uncharacterized protein OS=Cavia porcellus GN=DDX39B PE=4 SV=1            | CAVPO | 21 |
| 200 | 36.45 | 49.9 | 34.69 | 23.21 | 16.68 | tr H0UTQ3 H0UTQ3_CAVPO | Uncharacterized protein OS=Cavia porcellus GN=MYH9 PE=4 SV=1              | CAVPO | 27 |
| 201 | 36.1  | 36.1 | 56.33 | 56.33 | 49.56 | tr H0UYL6 H0UYL6_CAVPO | Uncharacterized protein OS=Cavia porcellus GN=FKBP4 PE=4 SV=1             | CAVPO | 19 |
| 202 | 35.88 | 35.9 | 66.04 | 60.62 | 59.17 | tr H0V2S5 H0V2S5_CAVPO | Uncharacterized protein OS=Cavia porcellus GN=UQCRC1 PE=3 SV=1            | CAVPO | 31 |
| 203 | 35.88 | 35.9 | 80.28 | 77.51 | 77.51 | tr H0VQ28 H0VQ28_CAVPO | Uncharacterized protein OS=Cavia porcellus GN=PPA1 PE=4 SV=1              | CAVPO | 20 |
| 204 | 35.83 | 35.9 | 65.75 | 63.39 | 61.02 | tr H0V8Q6 H0V8Q6_CAVPO | Uncharacterized protein OS=Cavia porcellus GN=PGAM1 PE=3 SV=1             | CAVPO | 46 |
| 205 | 35.49 | 35.5 | 82.95 | 80.18 | 79.72 | tr H0VAX0 H0VAX0_CAVPO | Uncharacterized protein OS=Cavia porcellus GN=LOC100731896 PE=3 SV=1      | CAVPO | 31 |
| 206 | 35.48 | 35.5 | 30.17 | 26.44 | 26.44 | tr H0UVA7 H0UVA7_CAVPO | Uncharacterized protein OS=Cavia porcellus GN=NCL PE=4 SV=1               | CAVPO | 20 |

|     |       |      |       |       |       |                        |                                                                                       |       |    |
|-----|-------|------|-------|-------|-------|------------------------|---------------------------------------------------------------------------------------|-------|----|
| 207 | 35.45 | 50.7 | 54.34 | 49.04 | 45.34 | tr H0V9E4 H0V9E4_CAVPO | Uncharacterized protein (Fragment) OS=Cavia porcellus GN=DDX5 PE=3 SV=1               | CAVPO | 30 |
| 208 | 35.23 | 35.3 | 43.67 | 39.44 | 33.56 | tr H0VI64 H0VI64_CAVPO | Uncharacterized protein OS=Cavia porcellus GN=CCAR2 PE=4 SV=1                         | CAVPO | 19 |
| 209 | 35.22 | 35.3 | 31.12 | 27.62 | 23.11 | tr H0UY46 H0UY46_CAVPO | Uncharacterized protein OS=Cavia porcellus GN=NNT PE=4 SV=1                           | CAVPO | 19 |
| 210 | 35.2  | 35.3 | 32.26 | 28.76 | 19.54 | tr H0UZS5 H0UZS5_CAVPO | Ubiquitin carboxyl-terminal hydrolase (Fragment) OS=Cavia porcellus GN=USP7 PE=3 SV=1 | CAVPO | 16 |
| 211 | 35.03 | 35   | 58.33 | 55.65 | 55.65 | tr H0UTZ2 H0UTZ2_CAVPO | Histone H2A OS=Cavia porcellus GN=H2AFY PE=3 SV=1                                     | CAVPO | 21 |
| 212 | 35.03 | 35.1 | 50.6  | 47.4  | 45.8  | tr H0VBD5 H0VBD5_CAVPO | Uncharacterized protein (Fragment) OS=Cavia porcellus GN=FSCN1 PE=4 SV=1              | CAVPO | 22 |
| 213 | 34.95 | 35   | 69.21 | 60.59 | 57.88 | tr H0VJ13 H0VJ13_CAVPO | Uncharacterized protein OS=Cavia porcellus GN=PSMC5 PE=3 SV=1                         | CAVPO | 19 |
| 214 | 34.95 | 35   | 45.38 | 42.69 | 38.08 | tr H0VT52 H0VT52_CAVPO | Uncharacterized protein OS=Cavia porcellus GN=ALDH9A1 PE=3 SV=1                       | CAVPO | 21 |
| 215 | 34.8  | 34.8 | 80.68 | 78.31 | 72.88 | tr H0VHA7 H0VHA7_CAVPO | Uncharacterized protein OS=Cavia porcellus GN=NAPA PE=4 SV=1                          | CAVPO | 18 |
| 216 | 34.75 | 34.8 | 22.17 | 16.38 | 14.11 | tr H0VJA5 H0VJA5_CAVPO | Uncharacterized protein OS=Cavia porcellus GN=UGGT1 PE=4 SV=1                         | CAVPO | 17 |
| 217 | 34.68 | 34.8 | 45.63 | 40.29 | 38.2  | tr H0WCI8 H0WCI8_CAVPO | Uncharacterized protein OS=Cavia porcellus GN=DLG4 PE=4 SV=1                          | CAVPO | 21 |
| 218 | 34.66 | 34.8 | 32.61 | 30.01 | 22.01 | tr H0W9B7 H0W9B7_CAVPO | Lon protease homolog, mitochondrial OS=Cavia porcellus GN=LONP1 PE=3 SV=1             | CAVPO | 18 |
| 219 | 34.51 | 42.6 | 48.07 | 42.23 | 34.79 | tr H0WBB5 H0WBB5_CAVPO | Uncharacterized protein (Fragment) OS=Cavia porcellus GN=PFKL PE=3 SV=1               | CAVPO | 25 |
| 220 | 34.5  | 34.7 | 46.85 | 41.18 | 31.99 | tr H0VC11 H0VC11_CAVPO | Uncharacterized protein OS=Cavia porcellus                                            | CAVPO | 19 |



|     |       |      |       |       |       |                        |                                                                           |       |    |
|-----|-------|------|-------|-------|-------|------------------------|---------------------------------------------------------------------------|-------|----|
|     |       |      |       |       |       |                        | GN=SF3B2 PE=4 SV=1                                                        |       |    |
| 221 | 34.4  | 34.4 | 40.75 | 34.99 | 31.77 | tr H0VLA9 H0VLA9_CAVPO | Uncharacterized protein (Fragment) OS=Cavia porcellus GN=IMMT PE=4 SV=1   | CAVPO | 17 |
| 222 | 34.39 | 34.4 | 35.89 | 33.73 | 25.21 | tr H0V673 H0V673_CAVPO | Uncharacterized protein (Fragment) OS=Cavia porcellus GN=Trim28 PE=4 SV=1 | CAVPO | 18 |
| 223 | 34.37 | 34.4 | 34.73 | 28.9  | 24.84 | tr H0V7D2 H0V7D2_CAVPO | Uncharacterized protein OS=Cavia porcellus GN=SND1 PE=4 SV=1              | CAVPO | 19 |
| 224 | 34.33 | 38.5 | 62.87 | 60.18 | 54.49 | tr H0V9E8 H0V9E8_CAVPO | L-lactate dehydrogenase OS=Cavia porcellus GN=LDHB PE=3 SV=1              | CAVPO | 33 |
| 225 | 34.32 | 34.4 | 58.82 | 48.53 | 48.53 | tr H0VM96 H0VM96_CAVPO | Uncharacterized protein (Fragment) OS=Cavia porcellus GN=ATIC PE=4 SV=1   | CAVPO | 19 |
| 226 | 34.31 | 34.7 | 40.04 | 30.92 | 23.39 | tr H0VML7 H0VML7_CAVPO | Uncharacterized protein OS=Cavia porcellus GN=IARS2 PE=3 SV=1             | CAVPO | 17 |
| 227 | 34.28 | 34.3 | 79.8  | 79.8  | 78.79 | tr H0VWR9 H0VWR9_CAVPO | Uncharacterized protein OS=Cavia porcellus GN=RCVRN PE=4 SV=1             | CAVPO | 36 |
| 228 | 34.2  | 34.2 | 49.38 | 46.6  | 45.06 | tr H0V2Q9 H0V2Q9_CAVPO | Uncharacterized protein OS=Cavia porcellus PE=4 SV=1                      | CAVPO | 27 |
| 229 | 34.16 | 34.2 | 53.58 | 53.24 | 52.05 | tr H0VAL1 H0VAL1_CAVPO | Uncharacterized protein OS=Cavia porcellus GN=HNRNPL PE=4 SV=1            | CAVPO | 34 |
| 230 | 34.15 | 34.2 | 43.75 | 41.44 | 41.44 | tr H0VRQ8 H0VRQ8_CAVPO | Adenosylhomocysteinase (Fragment) OS=Cavia porcellus GN=AHCY PE=3 SV=1    | CAVPO | 18 |
| 231 | 33.87 | 38.1 | 42.69 | 38.97 | 34.67 | tr H0WCD0 H0WCD0_CAVPO | Uncharacterized protein OS=Cavia porcellus GN=NEFM PE=3 SV=1              | CAVPO | 24 |
| 232 | 33.83 | 36   | 55.16 | 54.73 | 46.81 | tr H0VGH4 H0VGH4_CAVPO | Uncharacterized protein OS=Cavia porcellus GN=Nono PE=4 SV=1              | CAVPO | 21 |
| 233 | 33.76 | 33.8 | 72.94 | 69.02 | 68.63 | tr H0VBD1 H0VBD1_CAVPO | Uncharacterized protein (Fragment) OS=Cavia porcellus GN=YWHAE PE=3 SV=1  | CAVPO | 30 |

|     |       |      |       |       |       |                        |                                                                               |       |    |
|-----|-------|------|-------|-------|-------|------------------------|-------------------------------------------------------------------------------|-------|----|
| 234 | 33.74 | 33.9 | 44.85 | 40.15 | 32.5  | tr H0V014 H0V014_CAVPO | Uncharacterized protein OS=Cavia porcellus<br>GN=HSPA12A PE=4 SV=1            | CAVPO | 18 |
| 235 | 33.68 | 33.8 | 50.65 | 48.05 | 39.9  | tr H0VIT7 H0VIT7_CAVPO | Uncharacterized protein (Fragment) OS=Cavia<br>porcellus GN=TOMM70A PE=4 SV=1 | CAVPO | 17 |
| 236 | 33.63 | 33.7 | 70.71 | 67.16 | 65.09 | tr H0W7Y9 H0W7Y9_CAVPO | Malate dehydrogenase OS=Cavia porcellus<br>GN=Mdh2 PE=3 SV=1                  | CAVPO | 27 |
| 237 | 33.37 | 33.4 | 51.81 | 49.4  | 49.4  | tr H0VLM1 H0VLM1_CAVPO | Uncharacterized protein (Fragment) OS=Cavia<br>porcellus GN=SEPT7 PE=3 SV=1   | CAVPO | 20 |
| 238 | 33.31 | 34.4 | 35.53 | 34.43 | 32.1  | tr H0V0P2 H0V0P2_CAVPO | Uncharacterized protein OS=Cavia porcellus<br>GN=ADD1 PE=4 SV=1               | CAVPO | 21 |
| 239 | 33.31 | 33.5 | 27.09 | 23.38 | 21.01 | tr H0V5Q7 H0V5Q7_CAVPO | Uncharacterized protein OS=Cavia porcellus<br>GN=Cse1l PE=4 SV=1              | CAVPO | 20 |
| 240 | 33.26 | 33.4 | 51.5  | 43.78 | 43.78 | tr H0VS46 H0VS46_CAVPO | Citrate synthase (Fragment) OS=Cavia<br>porcellus GN=CS PE=3 SV=1             | CAVPO | 20 |
| 241 | 33.19 | 33.3 | 51.73 | 48.96 | 46.88 | tr H0VS89 H0VS89_CAVPO | Uncharacterized protein (Fragment) OS=Cavia<br>porcellus GN=SUCLA2 PE=3 SV=1  | CAVPO | 19 |
| 242 | 33.08 | 33.2 | 38.7  | 30.03 | 23.17 | tr H0V1M9 H0V1M9_CAVPO | Uncharacterized protein OS=Cavia porcellus<br>GN=ACO1 PE=4 SV=1               | CAVPO | 16 |
| 243 | 33.08 | 35.2 | 43.3  | 32.82 | 28.69 | tr H0V2V2 H0V2V2_CAVPO | Uncharacterized protein (Fragment) OS=Cavia<br>porcellus GN=EZR PE=4 SV=1     | CAVPO | 20 |
| 244 | 32.77 | 32.8 | 43.12 | 35.82 | 30.22 | tr H0VMZ4 H0VMZ4_CAVPO | Uncharacterized protein OS=Cavia porcellus<br>GN=FARSB PE=4 SV=1              | CAVPO | 16 |
| 245 | 32.75 | 32.8 | 25.29 | 23.13 | 20.16 | tr H0V2V7 H0V2V7_CAVPO | Uncharacterized protein (Fragment) OS=Cavia<br>porcellus GN=AP3D1 PE=4 SV=1   | CAVPO | 18 |
| 246 | 32.67 | 32.8 | 46.82 | 46.25 | 43.63 | tr H0VBP7 H0VBP7_CAVPO | Uncharacterized protein OS=Cavia porcellus<br>GN=EHD1 PE=4 SV=1               | CAVPO | 19 |
| 247 | 32.57 | 33.1 | 18.42 | 8.175 | 4.206 | tr H0VB93 H0VB93_CAVPO | Uncharacterized protein OS=Cavia porcellus<br>GN=PLEC PE=4 SV=1               | CAVPO | 16 |

|     |       |      |       |       |       |                        |                                                                                 |       |    |
|-----|-------|------|-------|-------|-------|------------------------|---------------------------------------------------------------------------------|-------|----|
| 248 | 32.53 | 32.6 | 29.62 | 26.39 | 17.46 | tr H0V5Q1 H0V5Q1_CAVPO | Uncharacterized protein (Fragment) OS=Cavia porcellus GN=AKAP12 PE=4 SV=1       | CAVPO | 19 |
| 249 | 32.53 | 32.6 | 22.2  | 19.01 | 14.7  | tr H0VC79 H0VC79_CAVPO | Uncharacterized protein OS=Cavia porcellus GN=CYP2 PE=4 SV=1                    | CAVPO | 16 |
| 250 | 31.94 | 32   | 45.1  | 33.56 | 27.52 | tr H0VSZ2 H0VSZ2_CAVPO | Uncharacterized protein (Fragment) OS=Cavia porcellus GN=DNM1L PE=3 SV=1        | CAVPO | 16 |
| 251 | 31.89 | 31.9 | 44.39 | 43.46 | 40.19 | tr H0WAS6 H0WAS6_CAVPO | Uncharacterized protein OS=Cavia porcellus GN=LOC100718808 PE=4 SV=1            | CAVPO | 24 |
| 252 | 31.83 | 31.8 | 56.35 | 56.35 | 52.79 | tr H0VS10 H0VS10_CAVPO | Uncharacterized protein OS=Cavia porcellus GN=Pa2g4 PE=4 SV=1                   | CAVPO | 16 |
| 253 | 31.81 | 33.1 | 53.21 | 47.39 | 45.98 | tr H0W278 H0W278_CAVPO | Uncharacterized protein (Fragment) OS=Cavia porcellus GN=LOC100728538 PE=3 SV=1 | CAVPO | 18 |
| 254 | 31.58 | 31.6 | 60.51 | 57.96 | 54.14 | tr H0VT90 H0VT90_CAVPO | Uncharacterized protein (Fragment) OS=Cavia porcellus GN=GNAO1 PE=4 SV=1        | CAVPO | 22 |
| 255 | 31.43 | 42.6 | 47.95 | 42.16 | 36.25 | tr H0VL02 H0VL02_CAVPO | Uncharacterized protein OS=Cavia porcellus GN=EPB41L1 PE=4 SV=1                 | CAVPO | 23 |
| 256 | 31.42 | 31.5 | 32.64 | 24.84 | 17.44 | tr H0VIN3 H0VIN3_CAVPO | Uncharacterized protein OS=Cavia porcellus GN=PITPNM1 PE=4 SV=1                 | CAVPO | 17 |
| 257 | 31.41 | 31.4 | 61.64 | 59.91 | 44.4  | tr H0V894 H0V894_CAVPO | Uncharacterized protein OS=Cavia porcellus GN=NDUFV1 PE=4 SV=1                  | CAVPO | 16 |
| 258 | 31.41 | 31.5 | 43.9  | 42.37 | 33.9  | tr H0VNX9 H0VNX9_CAVPO | Uncharacterized protein (Fragment) OS=Cavia porcellus GN=PTPN11 PE=4 SV=1       | CAVPO | 20 |
| 259 | 31.35 | 31.4 | 67.08 | 65.84 | 53.09 | tr H0UT17 H0UT17_CAVPO | Uncharacterized protein OS=Cavia porcellus GN=PDC PE=4 SV=1                     | CAVPO | 24 |
| 260 | 31.3  | 31.3 | 67.14 | 67.14 | 62.38 | tr H0W9D3 H0W9D3_CAVPO | Uncharacterized protein (Fragment) OS=Cavia porcellus GN=GSTP1 PE=3 SV=1        | CAVPO | 31 |
| 261 | 31.25 | 31.4 | 20.85 | 16.54 | 14.84 | tr H0VJV7 H0VJV7_CAVPO | Uncharacterized protein OS=Cavia porcellus GN=NFASC PE=4 SV=1                   | CAVPO | 16 |

|     |       |      |       |       |       |                        |                                                                                      |       |    |
|-----|-------|------|-------|-------|-------|------------------------|--------------------------------------------------------------------------------------|-------|----|
| 262 | 31.2  | 31.2 | 48.73 | 41.49 | 41.49 | tr H0VN04 H0VN04_CAVPO | Uncharacterized protein OS=Cavia porcellus<br>GN=ALDH7A1 PE=3 SV=1                   | CAVPO | 19 |
| 263 | 31.02 | 31.1 | 86.1  | 79.92 | 74.9  | tr H0VB71 H0VB71_CAVPO | Uncharacterized protein OS=Cavia porcellus<br>GN=CA2 PE=4 SV=1                       | CAVPO | 62 |
| 264 | 31.01 | 31.1 | 35.96 | 29.7  | 23.84 | tr H0VEC8 H0VEC8_CAVPO | Uncharacterized protein OS=Cavia porcellus<br>GN=GPRIN1 PE=4 SV=1                    | CAVPO | 16 |
| 265 | 30.86 | 30.9 | 44.99 | 39.89 | 39.89 | tr H0V4N2 H0V4N2_CAVPO | Uncharacterized protein OS=Cavia porcellus<br>GN=PSIP1 PE=4 SV=1                     | CAVPO | 22 |
| 266 | 30.84 | 30.9 | 54.2  | 46.56 | 37.98 | tr H0V2J8 H0V2J8_CAVPO | Uncharacterized protein OS=Cavia porcellus<br>GN=PAK2 PE=4 SV=1                      | CAVPO | 16 |
| 267 | 30.81 | 30.9 | 23.72 | 17.6  | 12.63 | tr H0VKV1 H0VKV1_CAVPO | Uncharacterized protein OS=Cavia porcellus<br>GN=SYNJ1 PE=4 SV=1                     | CAVPO | 16 |
| 268 | 30.73 | 30.8 | 72.33 | 71.84 | 68.45 | tr H0UZK2 H0UZK2_CAVPO | Synaptosomal-associated protein (Fragment)<br>OS=Cavia porcellus GN=SNAP25 PE=3 SV=1 | CAVPO | 23 |
| 269 | 30.69 | 36.6 | 50.1  | 43.06 | 41.61 | tr H0V286 H0V286_CAVPO | Uncharacterized protein OS=Cavia porcellus<br>GN=INA PE=3 SV=1                       | CAVPO | 24 |
| 270 | 30.68 | 30.9 | 18.38 | 14.82 | 9.593 | tr H0VQH3 H0VQH3_CAVPO | Uncharacterized protein OS=Cavia porcellus<br>GN=HCFC1 PE=4 SV=1                     | CAVPO | 15 |
| 271 | 30.67 | 30.8 | 64.2  | 62.35 | 59.26 | tr H0VMU3 H0VMU3_CAVPO | Uncharacterized protein (Fragment) OS=Cavia<br>porcellus GN=MAPK1 PE=4 SV=1          | CAVPO | 17 |
| 272 | 30.62 | 30.7 | 49    | 42.68 | 35.59 | tr H0VDG4 H0VDG4_CAVPO | Uncharacterized protein (Fragment) OS=Cavia<br>porcellus GN=SDHA PE=4 SV=1           | CAVPO | 17 |
| 273 | 30.62 | 30.7 | 44.06 | 38.75 | 33.59 | tr H0VH45 H0VH45_CAVPO | Uncharacterized protein OS=Cavia porcellus<br>GN=UBA2 PE=3 SV=1                      | CAVPO | 16 |
| 274 | 30.6  | 30.6 | 61.35 | 57.84 | 52.7  | tr H0UVB7 H0UVB7_CAVPO | Uncharacterized protein OS=Cavia porcellus<br>GN=PPID PE=4 SV=1                      | CAVPO | 19 |
| 275 | 30.59 | 30.7 | 84.85 | 77.58 | 73.94 | tr H0UZ02 H0UZ02_CAVPO | Peptidyl-prolyl cis-trans isomerase OS=Cavia<br>porcellus GN=PPIA PE=3 SV=1          | CAVPO | 49 |

|     |       |      |       |       |       |                        |                                                                                                  |       |    |
|-----|-------|------|-------|-------|-------|------------------------|--------------------------------------------------------------------------------------------------|-------|----|
| 276 | 30.5  | 30.6 | 31.19 | 29.2  | 21.13 | tr H0VNL9 H0VNL9_CAVPO | Uncharacterized protein OS=Cavia porcellus<br>GN=CTNNA1 PE=4 SV=1                                | CAVPO | 18 |
| 277 | 30.47 | 30.6 | 31.86 | 29.11 | 26.37 | tr H0UTX6 H0UTX6_CAVPO | Uncharacterized protein (Fragment) OS=Cavia<br>porcellus GN=PSMD1 PE=4 SV=1                      | CAVPO | 17 |
| 278 | 30.44 | 31   | 60.91 | 56.94 | 55.95 | tr H0WDA2 H0WDA2_CAVPO | Uncharacterized protein OS=Cavia porcellus<br>GN=PRPF19 PE=4 SV=1                                | CAVPO | 17 |
| 279 | 30.41 | 30.7 | 45.78 | 39.56 | 27.26 | tr H0V525 H0V525_CAVPO | Annexin (Fragment) OS=Cavia porcellus<br>GN=ANXA6 PE=3 SV=1                                      | CAVPO | 13 |
| 280 | 30.25 | 30.4 | 50.85 | 42.77 | 31.06 | tr H0W8I2 H0W8I2_CAVPO | Uncharacterized protein (Fragment) OS=Cavia<br>porcellus GN=RUVBL2 PE=4 SV=1                     | CAVPO | 14 |
| 281 | 30.21 | 30.6 | 57.31 | 57.31 | 51.54 | tr H0UTU2 H0UTU2_CAVPO | Uncharacterized protein OS=Cavia porcellus<br>GN=PSPC1 PE=4 SV=1                                 | CAVPO | 17 |
| 282 | 30.17 | 30.3 | 56.87 | 52.64 | 49.68 | tr H0UZD4 H0UZD4_CAVPO | Uncharacterized protein (Fragment) OS=Cavia<br>porcellus GN=DNPEP PE=3 SV=1                      | CAVPO | 19 |
| 283 | 30.16 | 30.4 | 61.26 | 56.21 | 43.16 | tr H0V5E7 H0V5E7_CAVPO | Uncharacterized protein OS=Cavia porcellus<br>GN=HADHB PE=3 SV=1                                 | CAVPO | 16 |
| 284 | 30.14 | 30.2 | 59.91 | 51.25 | 48.52 | tr H0VBR1 H0VBR1_CAVPO | Uncharacterized protein (Fragment) OS=Cavia<br>porcellus GN=PSMC3 PE=3 SV=1                      | CAVPO | 18 |
| 285 | 30.13 | 30.2 | 56.97 | 54.73 | 51.24 | tr H0VMG4 H0VMG4_CAVPO | Uncharacterized protein OS=Cavia porcellus<br>GN=DCTN2 PE=4 SV=1                                 | CAVPO | 15 |
| 286 | 30.05 | 30.1 | 46.77 | 44.4  | 42.46 | tr H0VLR4 H0VLR4_CAVPO | Uncharacterized protein (Fragment) OS=Cavia<br>porcellus GN=MECP2 PE=4 SV=1                      | CAVPO | 21 |
| 287 | 29.99 | 30.2 | 30.49 | 24.8  | 13.16 | tr H0VSS2 H0VSS2_CAVPO | Eukaryotic translation initiation factor 3<br>subunit A OS=Cavia porcellus GN=EIF3A<br>PE=3 SV=1 | CAVPO | 12 |
| 288 | 29.95 | 30.1 | 31.67 | 28.33 | 17.96 | tr H0V416 H0V416_CAVPO | Uncharacterized protein (Fragment) OS=Cavia<br>porcellus GN=IPO5 PE=4 SV=1                       | CAVPO | 15 |
| 289 | 29.91 | 30.2 | 32.88 | 30.04 | 27.35 | tr H0VBE1 H0VBE1_CAVPO | Uncharacterized protein OS=Cavia porcellus                                                       | CAVPO | 17 |

|     |       |      |       |       |       |                        |                                                                              |       |    |
|-----|-------|------|-------|-------|-------|------------------------|------------------------------------------------------------------------------|-------|----|
|     |       |      |       |       |       |                        | GN=RBM14 PE=4 SV=1                                                           |       |    |
| 290 | 29.88 | 30   | 67.69 | 65.23 | 58.77 | tr H0VM25 H0VM25_CAVPO | Uncharacterized protein OS=Cavia porcellus<br>GN=AKR1A1 PE=4 SV=1            | CAVPO | 15 |
| 291 | 29.8  | 43.8 | 73.73 | 71.66 | 70.05 | tr H0VDC5 H0VDC5_CAVPO | Uncharacterized protein OS=Cavia porcellus<br>GN=ENO2 PE=3 SV=1              | CAVPO | 53 |
| 292 | 29.78 | 30   | 43.48 | 36.82 | 26.97 | tr H0V9Z5 H0V9Z5_CAVPO | Uncharacterized protein OS=Cavia porcellus<br>GN=RARS PE=3 SV=1              | CAVPO | 15 |
| 293 | 29.7  | 30.1 | 84.76 | 80.95 | 80    | tr H0VJX4 H0VJX4_CAVPO | Uncharacterized protein (Fragment) OS=Cavia<br>porcellus GN=HDGF PE=4 SV=1   | CAVPO | 23 |
| 294 | 29.69 | 29.8 | 65.3  | 63.41 | 58.04 | tr H0VF29 H0VF29_CAVPO | Uncharacterized protein OS=Cavia porcellus<br>GN=RLBP1 PE=4 SV=1             | CAVPO | 20 |
| 295 | 29.63 | 29.7 | 65.7  | 62.79 | 56.98 | tr H0VCZ6 H0VCZ6_CAVPO | Uncharacterized protein (Fragment) OS=Cavia<br>porcellus GN=GNB2L1 PE=4 SV=1 | CAVPO | 18 |
| 296 | 29.39 | 29.5 | 25.7  | 20.79 | 20.09 | tr H0UWX2 H0UWX2_CAVPO | Uncharacterized protein OS=Cavia porcellus<br>GN=SRRT PE=4 SV=1              | CAVPO | 16 |
| 297 | 29.24 | 51.1 | 38.34 | 35.07 | 29.55 | tr H0V4P1 H0V4P1_CAVPO | Uncharacterized protein OS=Cavia porcellus<br>GN=AP2A1 PE=4 SV=1             | CAVPO | 27 |
| 298 | 29.22 | 29.4 | 62.33 | 52.91 | 47.98 | tr H0W4K9 H0W4K9_CAVPO | Uncharacterized protein OS=Cavia porcellus<br>GN=SCLY PE=4 SV=1              | CAVPO | 17 |
| 299 | 29.02 | 29.1 | 58.19 | 49.9  | 37.96 | tr H0VLV4 H0VLV4_CAVPO | Uncharacterized protein OS=Cavia porcellus<br>GN=LAP3 PE=3 SV=1              | CAVPO | 17 |
| 300 | 29    | 29.1 | 43.39 | 39.37 | 39.37 | tr A4L9L3 A4L9L3_CAVPO | Rhodopsin OS=Cavia porcellus GN=Rho PE=2<br>SV=1                             | CAVPO | 65 |
| 301 | 28.98 | 31.2 | 43.79 | 41.57 | 36.83 | tr H0W7J5 H0W7J5_CAVPO | Uncharacterized protein OS=Cavia porcellus<br>GN=FUBP1 PE=4 SV=1             | CAVPO | 19 |
| 302 | 28.95 | 29   | 51.3  | 49.74 | 47.14 | tr H0V665 H0V665_CAVPO | Uncharacterized protein (Fragment) OS=Cavia<br>porcellus GN=CADM1 PE=4 SV=1  | CAVPO | 25 |

|     |       |      |       |       |       |                        |                                                                           |       |    |
|-----|-------|------|-------|-------|-------|------------------------|---------------------------------------------------------------------------|-------|----|
| 303 | 28.91 | 29.1 | 28.17 | 20.43 | 17.22 | tr H0WC63 H0WC63_CAVPO | Uncharacterized protein (Fragment) OS=Cavia porcellus GN=TJP2 PE=4 SV=1   | CAVPO | 15 |
| 304 | 28.9  | 29   | 34.58 | 30.94 | 22.64 | tr H0VKL0 H0VKL0_CAVPO | Uncharacterized protein OS=Cavia porcellus GN=USO1 PE=4 SV=1              | CAVPO | 14 |
| 305 | 28.88 | 28.9 | 63.38 | 63.1  | 60.85 | tr H0V4H8 H0V4H8_CAVPO | Uncharacterized protein OS=Cavia porcellus GN=Hnrnpk PE=4 SV=1            | CAVPO | 27 |
| 306 | 28.82 | 28.9 | 50.79 | 46.86 | 38.22 | tr H0VFT3 H0VFT3_CAVPO | Uncharacterized protein OS=Cavia porcellus GN=ATP6V1C1 PE=4 SV=1          | CAVPO | 15 |
| 307 | 28.75 | 28.8 | 69.38 | 62.08 | 55.62 | tr H0VNW7 H0VNW7_CAVPO | Uncharacterized protein OS=Cavia porcellus GN=PCBP1 PE=4 SV=1             | CAVPO | 19 |
| 308 | 28.71 | 28.8 | 78.41 | 70.04 | 70.04 | tr H0VIE5 H0VIE5_CAVPO | Uncharacterized protein (Fragment) OS=Cavia porcellus GN=PRDX6 PE=4 SV=1  | CAVPO | 19 |
| 309 | 28.71 | 32.6 | 48.02 | 36.59 | 32.32 | tr H0VP03 H0VP03_CAVPO | Uncharacterized protein (Fragment) OS=Cavia porcellus GN=DDX3X PE=3 SV=1  | CAVPO | 19 |
| 310 | 28.65 | 28.7 | 91.98 | 91.98 | 89.84 | tr H0W1E7 H0W1E7_CAVPO | Uncharacterized protein OS=Cavia porcellus GN=PEBP1 PE=4 SV=1             | CAVPO | 21 |
| 311 | 28.63 | 64.2 | 79.4  | 76.62 | 73.84 | tr H0UYF4 H0UYF4_CAVPO | Uncharacterized protein (Fragment) OS=Cavia porcellus GN=TUBB3 PE=3 SV=1  | CAVPO | 90 |
| 312 | 28.6  | 28.6 | 74.91 | 73.5  | 70.67 | tr H0W405 H0W405_CAVPO | Uncharacterized protein OS=Cavia porcellus GN=Vdac1 PE=4 SV=1             | CAVPO | 27 |
| 313 | 28.56 | 28.7 | 24.36 | 21.61 | 16.64 | tr H0VQW6 H0VQW6_CAVPO | Uncharacterized protein (Fragment) OS=Cavia porcellus GN=GLG1 PE=4 SV=1   | CAVPO | 15 |
| 314 | 28.55 | 28.6 | 54.58 | 51.86 | 51.86 | tr H0UWA3 H0UWA3_CAVPO | Uncharacterized protein OS=Cavia porcellus GN=LOC100713856 PE=4 SV=1      | CAVPO | 22 |
| 315 | 28.5  | 28.6 | 20.82 | 17.35 | 10.2  | tr H0WB17 H0WB17_CAVPO | Uncharacterized protein OS=Cavia porcellus GN=CPNE1 PE=4 SV=1             | CAVPO | 14 |
| 316 | 28.41 | 28.6 | 25.33 | 17.25 | 13.33 | tr H0VHJ2 H0VHJ2_CAVPO | Uncharacterized protein (Fragment) OS=Cavia porcellus GN=KIF21A PE=3 SV=1 | CAVPO | 17 |

|     |       |      |       |       |       |                        |                                                                               |       |    |
|-----|-------|------|-------|-------|-------|------------------------|-------------------------------------------------------------------------------|-------|----|
| 317 | 28.36 | 33.4 | 44.85 | 44.85 | 42.16 | tr H0VIL8 H0VIL8_CAVPO | Uncharacterized protein OS=Cavia porcellus<br>GN=EIF4A2 PE=3 SV=1             | CAVPO | 19 |
| 318 | 28.31 | 28.5 | 39.22 | 33.99 | 27.94 | tr H0VS65 H0VS65_CAVPO | Uncharacterized protein (Fragment) OS=Cavia<br>porcellus GN=GUCY1B3 PE=3 SV=1 | CAVPO | 15 |
| 319 | 28.23 | 28.3 | 51.75 | 51.75 | 44.96 | tr H0VEU3 H0VEU3_CAVPO | Uncharacterized protein OS=Cavia porcellus<br>GN=RUVBL1 PE=4 SV=1             | CAVPO | 16 |
| 320 | 28.22 | 28.4 | 49.41 | 46.85 | 36.81 | tr H0UUQ7 H0UUQ7_CAVPO | Uncharacterized protein OS=Cavia porcellus<br>GN=FARSA PE=3 SV=1              | CAVPO | 15 |
| 321 | 28.15 | 28.3 | 41.83 | 34.77 | 26.41 | tr H0W6X4 H0W6X4_CAVPO | Uncharacterized protein OS=Cavia porcellus<br>GN=SEC23A PE=4 SV=1             | CAVPO | 17 |
| 322 | 28.13 | 28.2 | 48.79 | 43.27 | 41.06 | tr H0V8C7 H0V8C7_CAVPO | Uncharacterized protein OS=Cavia porcellus<br>GN=UQCRC2 PE=3 SV=1             | CAVPO | 17 |
| 323 | 28.12 | 28.3 | 60    | 58.44 | 41.11 | tr H0VCQ1 H0VCQ1_CAVPO | Uncharacterized protein OS=Cavia porcellus<br>GN=LANCL2 PE=4 SV=1             | CAVPO | 18 |
| 324 | 28.11 | 28.2 | 42.86 | 41.24 | 35.02 | tr H0UV63 H0UV63_CAVPO | Uncharacterized protein OS=Cavia porcellus<br>GN=CMAS PE=4 SV=1               | CAVPO | 14 |
| 325 | 28.1  | 28.1 | 59.94 | 58.68 | 58.68 | tr H0UVQ5 H0UVQ5_CAVPO | Uncharacterized protein (Fragment) OS=Cavia<br>porcellus GN=PRKAR2A PE=4 SV=1 | CAVPO | 16 |
| 326 | 28.05 | 28.3 | 26.28 | 23.62 | 15.85 | tr H0VU24 H0VU24_CAVPO | Uncharacterized protein OS=Cavia porcellus<br>GN=THRAP3 PE=4 SV=1             | CAVPO | 14 |
| 327 | 28.01 | 28.3 | 50.63 | 41.59 | 23.37 | tr H0VM53 H0VM53_CAVPO | Uncharacterized protein (Fragment) OS=Cavia<br>porcellus GN=ACSL6 PE=4 SV=1   | CAVPO | 14 |
| 328 | 27.95 | 30.1 | 51.99 | 48.01 | 45.26 | tr H0UXA8 H0UXA8_CAVPO | Transaldolase OS=Cavia porcellus<br>GN=TALDO1 PE=3 SV=1                       | CAVPO | 19 |
| 329 | 27.91 | 28.1 | 25.07 | 23.45 | 22.64 | tr H0VGG4 H0VGG4_CAVPO | Uncharacterized protein OS=Cavia porcellus<br>GN=SV2A PE=4 SV=1               | CAVPO | 18 |
| 330 | 27.89 | 28   | 49    | 37.03 | 25.56 | tr H0UV42 H0UV42_CAVPO | Uncharacterized protein OS=Cavia porcellus<br>GN=CDC5L PE=4 SV=1              | CAVPO | 14 |



|     |       |      |       |       |       |                        |                                                                             |       |    |
|-----|-------|------|-------|-------|-------|------------------------|-----------------------------------------------------------------------------|-------|----|
| 331 | 27.88 | 28   | 34.88 | 27.15 | 18.21 | tr H0VRK1 H0VRK1_CAVPO | Uncharacterized protein (Fragment) OS=Cavia porcellus GN=COPB2 PE=4 SV=1    | CAVPO | 14 |
| 332 | 27.66 | 27.7 | 50.69 | 49.31 | 49.31 | tr H0UXR9 H0UXR9_CAVPO | Uncharacterized protein OS=Cavia porcellus GN=STX1B PE=3 SV=1               | CAVPO | 17 |
| 333 | 27.64 | 28.2 | 23.23 | 16.97 | 9.804 | tr H0V2Q4 H0V2Q4_CAVPO | Uncharacterized protein (Fragment) OS=Cavia porcellus GN=MAP3K5 PE=4 SV=1   | CAVPO | 13 |
| 334 | 27.63 | 28   | 18.78 | 15.71 | 14.1  | tr H0VQQ2 H0VQQ2_CAVPO | Uncharacterized protein OS=Cavia porcellus GN=CNGB1 PE=4 SV=1               | CAVPO | 20 |
| 335 | 27.54 | 27.7 | 52.12 | 48.43 | 39.96 | tr H0VLY5 H0VLY5_CAVPO | Uncharacterized protein (Fragment) OS=Cavia porcellus GN=GLS PE=3 SV=1      | CAVPO | 20 |
| 336 | 27.47 | 32   | 57.11 | 52.53 | 48.43 | tr H0W0E9 H0W0E9_CAVPO | Uncharacterized protein (Fragment) OS=Cavia porcellus GN=HNRNPF PE=4 SV=1   | CAVPO | 19 |
| 337 | 27.44 | 27.5 | 52.96 | 52.66 | 50.59 | tr H0VT79 H0VT79_CAVPO | Uncharacterized protein (Fragment) OS=Cavia porcellus GN=SH3GL2 PE=4 SV=1   | CAVPO | 19 |
| 338 | 27.36 | 27.5 | 39.05 | 34.69 | 31.16 | tr O70529 O70529_CAVPO | Mutifunctional protein2 OS=Cavia porcellus PE=2 SV=1                        | CAVPO | 14 |
| 339 | 27.27 | 27.4 | 36.7  | 32.39 | 25.26 | tr H0VEQ3 H0VEQ3_CAVPO | Uncharacterized protein (Fragment) OS=Cavia porcellus GN=PADI2 PE=4 SV=1    | CAVPO | 15 |
| 340 | 27.17 | 27.5 | 31.95 | 28.07 | 20.18 | tr H0VJD7 H0VJD7_CAVPO | Uncharacterized protein (Fragment) OS=Cavia porcellus GN=AMPD2 PE=4 SV=1    | CAVPO | 15 |
| 341 | 27.17 | 27.3 | 34.85 | 32.48 | 26.28 | tr H0VN93 H0VN93_CAVPO | Uncharacterized protein (Fragment) OS=Cavia porcellus GN=NARS PE=3 SV=1     | CAVPO | 13 |
| 342 | 27.12 | 40.3 | 45.45 | 41.73 | 33.38 | tr H0VN69 H0VN69_CAVPO | Uncharacterized protein (Fragment) OS=Cavia porcellus GN=SLC25A13 PE=3 SV=1 | CAVPO | 21 |
| 343 | 27.12 | 27.2 | 31.69 | 24.37 | 22.73 | tr H0W4K7 H0W4K7_CAVPO | Uncharacterized protein OS=Cavia porcellus GN=SAFB PE=4 SV=1                | CAVPO | 15 |
| 344 | 27.06 | 27.2 | 50.55 | 47.63 | 38.32 | tr H0VH80 H0VH80_CAVPO | Uncharacterized protein (Fragment) OS=Cavia porcellus GN=MYEF2 PE=4 SV=1    | CAVPO | 15 |

|     |       |      |       |       |       |                        |                                                                                                  |       |    |
|-----|-------|------|-------|-------|-------|------------------------|--------------------------------------------------------------------------------------------------|-------|----|
| 345 | 26.91 | 27   | 40.76 | 36.01 | 27.31 | tr H0UUH1 H0UUH1_CAVPO | Uncharacterized protein OS=Cavia porcellus<br>GN=DPP3 PE=4 SV=1                                  | CAVPO | 14 |
| 346 | 26.87 | 26.9 | 53.8  | 51.58 | 49.68 | tr H0UVV9 H0UVV9_CAVPO | Uncharacterized protein OS=Cavia porcellus<br>GN=AKR1B1 PE=4 SV=1                                | CAVPO | 15 |
| 347 | 26.82 | 27   | 60.51 | 56.92 | 50.26 | tr H0VE97 H0VE97_CAVPO | Pyruvate dehydrogenase E1 component<br>subunit alpha OS=Cavia porcellus GN=Pdha1<br>PE=3 SV=1    | CAVPO | 16 |
| 348 | 26.74 | 26.9 | 34.26 | 28.19 | 22.63 | tr H0VLN9 H0VLN9_CAVPO | Eukaryotic translation initiation factor 3<br>subunit B OS=Cavia porcellus GN=EIF3B PE=3<br>SV=1 | CAVPO | 16 |
| 349 | 26.67 | 26.8 | 41.46 | 41.46 | 37.25 | tr H0VF70 H0VF70_CAVPO | Uncharacterized protein OS=Cavia porcellus<br>GN=CCBL2 PE=4 SV=1                                 | CAVPO | 14 |
| 350 | 26.66 | 26.7 | 40.26 | 32.18 | 27.23 | tr H0UX41 H0UX41_CAVPO | Uncharacterized protein (Fragment) OS=Cavia<br>porcellus GN=RAP1GDS1 PE=4 SV=1                   | CAVPO | 14 |
| 351 | 26.65 | 26.8 | 23.13 | 17.04 | 14.4  | tr H0V1J8 H0V1J8_CAVPO | Uncharacterized protein OS=Cavia porcellus<br>GN=SYNM PE=3 SV=1                                  | CAVPO | 13 |
| 352 | 26.65 | 26.8 | 31.85 | 24.79 | 21.06 | tr H0V562 H0V562_CAVPO | Uncharacterized protein OS=Cavia porcellus<br>GN=CTNND1 PE=4 SV=1                                | CAVPO | 15 |
| 353 | 26.65 | 26.7 | 43.14 | 31.81 | 27.42 | tr H0VHG4 H0VHG4_CAVPO | Uncharacterized protein OS=Cavia porcellus<br>GN=SCP2 PE=4 SV=1                                  | CAVPO | 13 |
| 354 | 26.61 | 27.1 | 38.1  | 35.02 | 28.11 | tr H0UYX2 H0UYX2_CAVPO | Uncharacterized protein OS=Cavia porcellus<br>GN=RNPEP PE=4 SV=1                                 | CAVPO | 15 |
| 355 | 26.53 | 26.6 | 21.71 | 19.3  | 14.81 | tr H0VKW4 H0VKW4_CAVPO | Uncharacterized protein (Fragment) OS=Cavia<br>porcellus GN=UBE2O PE=4 SV=1                      | CAVPO | 14 |
| 356 | 26.51 | 26.6 | 43.14 | 42.14 | 28.57 | tr H0V7W2 H0V7W2_CAVPO | Uncharacterized protein (Fragment) OS=Cavia<br>porcellus GN=C2CD2L PE=4 SV=1                     | CAVPO | 13 |
| 357 | 26.46 | 26.6 | 31.82 | 28.03 | 21.02 | tr H0VW42 H0VW42_CAVPO | Uncharacterized protein (Fragment) OS=Cavia<br>porcellus GN=THOP1 PE=3 SV=1                      | CAVPO | 15 |

|     |       |      |       |       |       |                        |                                                                                |       |    |
|-----|-------|------|-------|-------|-------|------------------------|--------------------------------------------------------------------------------|-------|----|
| 358 | 26.41 | 26.5 | 31.2  | 25.19 | 14.44 | tr H0VJ01 H0VJ01_CAVPO | Uncharacterized protein OS=Cavia porcellus<br>GN=DDX46 PE=3 SV=1               | CAVPO | 12 |
| 359 | 26.26 | 26.3 | 67.01 | 59.38 | 59.38 | tr H0UUF6 H0UUF6_CAVPO | Uncharacterized protein (Fragment) OS=Cavia<br>porcellus GN=PNP PE=4 SV=1      | CAVPO | 15 |
| 360 | 26.24 | 30.7 | 50    | 40.37 | 35.74 | tr H0VTM9 H0VTM9_CAVPO | Uncharacterized protein OS=Cavia porcellus<br>GN=MPP6 PE=4 SV=1                | CAVPO | 19 |
| 361 | 26.23 | 26.3 | 64.78 | 61.01 | 59.12 | tr H0VR33 H0VR33_CAVPO | Uncharacterized protein OS=Cavia porcellus<br>GN=APEX1 PE=4 SV=1               | CAVPO | 17 |
| 362 | 26.23 | 26.3 | 25.58 | 19.12 | 14.9  | tr H0VSS1 H0VSS1_CAVPO | Uncharacterized protein OS=Cavia porcellus<br>GN=CLASP2 PE=4 SV=1              | CAVPO | 14 |
| 363 | 26.16 | 26.2 | 56.44 | 54.1  | 52.69 | tr H0VC99 H0VC99_CAVPO | Uncharacterized protein (Fragment) OS=Cavia<br>porcellus GN=CTBP2 PE=3 SV=1    | CAVPO | 17 |
| 364 | 26.16 | 26.3 | 39.09 | 33.04 | 23.46 | tr H0VRD6 H0VRD6_CAVPO | Uncharacterized protein OS=Cavia porcellus<br>GN=SF3A1 PE=4 SV=1               | CAVPO | 14 |
| 365 | 26.09 | 26.2 | 50.76 | 50.54 | 41.04 | tr H0VLJ1 H0VLJ1_CAVPO | Uncharacterized protein OS=Cavia porcellus<br>GN=NDUFS2 PE=3 SV=1              | CAVPO | 17 |
| 366 | 26.09 | 26.2 | 67.31 | 67.31 | 63.46 | tr H0W865 H0W865_CAVPO | Histone H4 (Fragment) OS=Cavia porcellus<br>GN=LOC100736110 PE=3 SV=1          | CAVPO | 38 |
| 367 | 26    | 32.4 | 76.61 | 76.61 | 76.61 | tr Q91Y83 Q91Y83_CAVPO | Glutathione S-transferase subunit gYc<br>OS=Cavia porcellus GN=Gstm2 PE=2 SV=1 | CAVPO | 22 |
| 368 | 25.97 | 26.1 | 44.2  | 35.45 | 30.68 | tr H0UXV8 H0UXV8_CAVPO | Uncharacterized protein (Fragment) OS=Cavia<br>porcellus GN=TTLL12 PE=4 SV=1   | CAVPO | 17 |
| 369 | 25.97 | 26.2 | 41.06 | 31.92 | 23.94 | tr H0VFT4 H0VFT4_CAVPO | Uncharacterized protein OS=Cavia porcellus<br>GN=QARS PE=3 SV=1                | CAVPO | 15 |
| 370 | 25.97 | 26   | 54.19 | 47.6  | 47.6  | tr H0VHL7 H0VHL7_CAVPO | Malate dehydrogenase (Fragment) OS=Cavia<br>porcellus GN=MDH1 PE=3 SV=1        | CAVPO | 26 |
| 371 | 25.97 | 26   | 53.17 | 53.17 | 44.08 | tr H0VMZ8 H0VMZ8_CAVPO | Uncharacterized protein OS=Cavia porcellus<br>GN=SYN1 PE=4 SV=1                | CAVPO | 18 |

|     |       |      |       |       |       |                        |                                                                                |       |    |
|-----|-------|------|-------|-------|-------|------------------------|--------------------------------------------------------------------------------|-------|----|
| 372 | 25.89 | 25.9 | 51.8  | 46.4  | 46.4  | tr H0VKG9 H0VKG9_CAVPO | Uncharacterized protein OS=Cavia porcellus<br>GN=PACSIN1 PE=4 SV=1             | CAVPO | 15 |
| 373 | 25.88 | 26.1 | 14.72 | 10.67 | 8.611 | tr H0VGT5 H0VGT5_CAVPO | Uncharacterized protein OS=Cavia porcellus<br>GN=KIF1A PE=3 SV=1               | CAVPO | 14 |
| 374 | 25.83 | 27.3 | 29.12 | 19.98 | 13.23 | tr H0UY50 H0UY50_CAVPO | Uncharacterized protein OS=Cavia porcellus<br>GN=SMARCA5 PE=4 SV=1             | CAVPO | 12 |
| 375 | 25.76 | 27.3 | 63.61 | 56.46 | 56.46 | tr H0UZA0 H0UZA0_CAVPO | Uncharacterized protein OS=Cavia porcellus<br>GN=VDAC2 PE=4 SV=1               | CAVPO | 20 |
| 376 | 25.69 | 25.9 | 34.64 | 25.65 | 20.31 | tr H0V5Z7 H0V5Z7_CAVPO | Uncharacterized protein (Fragment) OS=Cavia<br>porcellus GN=CUL3 PE=3 SV=1     | CAVPO | 14 |
| 377 | 25.66 | 25.8 | 44.65 | 34.9  | 31.71 | tr H0V8G4 H0V8G4_CAVPO | Uncharacterized protein OS=Cavia porcellus<br>GN=PHGDH PE=3 SV=1               | CAVPO | 14 |
| 378 | 25.65 | 25.7 | 77.78 | 73.91 | 71.01 | tr H0VTS0 H0VTS0_CAVPO | Uncharacterized protein OS=Cavia porcellus<br>GN=RAB7A PE=3 SV=1               | CAVPO | 15 |
| 379 | 25.6  | 25.8 | 51.9  | 40.28 | 37.68 | tr H0V2G6 H0V2G6_CAVPO | Uncharacterized protein OS=Cavia porcellus<br>GN=CAMK2D PE=4 SV=1              | CAVPO | 17 |
| 380 | 25.57 | 25.7 | 48.59 | 46.29 | 36.32 | tr H0VKT5 H0VKT5_CAVPO | Uncharacterized protein OS=Cavia porcellus<br>GN=RBMX PE=4 SV=1                | CAVPO | 14 |
| 381 | 25.52 | 25.7 | 21.17 | 17.74 | 12.22 | tr H0VEQ7 H0VEQ7_CAVPO | Uncharacterized protein OS=Cavia porcellus<br>GN=TBCD PE=4 SV=1                | CAVPO | 11 |
| 382 | 25.49 | 25.6 | 56.58 | 53.33 | 33.69 | tr H0VJK1 H0VJK1_CAVPO | Uncharacterized protein (Fragment) OS=Cavia<br>porcellus GN=TMPO PE=4 SV=1     | CAVPO | 13 |
| 383 | 25.49 | 25.6 | 56.58 | 53.33 | 33.69 | tr H0VJK1 H0VJK1_CAVPO | Uncharacterized protein (Fragment) OS=Cavia<br>porcellus GN=TMPO PE=4 SV=1     | CAVPO | 13 |
| 384 | 25.45 | 25.7 | 29.53 | 22.54 | 18.12 | tr H0VJ05 H0VJ05_CAVPO | Transcription elongation factor SPT5 OS=Cavia<br>porcellus GN=SUPT5H PE=3 SV=1 | CAVPO | 14 |
| 385 | 25.43 | 27.8 | 57.04 | 46.24 | 41.08 | tr H0VKA3 H0VKA3_CAVPO | Uncharacterized protein OS=Cavia porcellus<br>GN=SEPT6 PE=3 SV=1               | CAVPO | 15 |

|     |       |      |       |       |       |                        |                                                                                 |       |    |
|-----|-------|------|-------|-------|-------|------------------------|---------------------------------------------------------------------------------|-------|----|
| 386 | 25.31 | 29.5 | 60.14 | 58.78 | 53.38 | tr H0VWR2 H0VWR2_CAVPO | Uncharacterized protein OS=Cavia porcellus<br>PE=4 SV=1                         | CAVPO | 35 |
| 387 | 25.2  | 25.2 | 51.27 | 49.01 | 45.07 | tr H0UUJ4 H0UUJ4_CAVPO | Uncharacterized protein OS=Cavia porcellus<br>GN=GNAZ PE=4 SV=1                 | CAVPO | 12 |
| 388 | 25.16 | 25.2 | 61.22 | 57.41 | 57.41 | tr H0UUB7 H0UUB7_CAVPO | Uncharacterized protein OS=Cavia porcellus<br>GN=CALB1 PE=4 SV=1                | CAVPO | 17 |
| 389 | 25.12 | 25.2 | 43.35 | 36.24 | 36.24 | tr H0VLH9 H0VLH9_CAVPO | Uncharacterized protein (Fragment) OS=Cavia<br>porcellus GN=AP2M1 PE=4 SV=1     | CAVPO | 14 |
| 390 | 25.11 | 25.1 | 33.99 | 33.6  | 33.6  | tr H0UZ00 H0UZ00_CAVPO | Uncharacterized protein OS=Cavia porcellus<br>GN=PCYOX1 PE=4 SV=1               | CAVPO | 17 |
| 391 | 25.09 | 25.2 | 29.62 | 24.76 | 18.86 | tr H0V163 H0V163_CAVPO | Uncharacterized protein OS=Cavia porcellus<br>GN=ANK2 PE=4 SV=1                 | CAVPO | 14 |
| 392 | 25.03 | 25.1 | 31.55 | 25.12 | 24.02 | tr H0VQ41 H0VQ41_CAVPO | Protein arginine N-methyltransferase 5<br>OS=Cavia porcellus GN=PRMT5 PE=3 SV=1 | CAVPO | 13 |
| 393 | 24.99 | 25   | 49.86 | 47.09 | 45.43 | tr H0V393 H0V393_CAVPO | Uncharacterized protein OS=Cavia porcellus<br>GN=ADK PE=4 SV=1                  | CAVPO | 15 |
| 394 | 24.95 | 25.7 | 56    | 46.13 | 41.6  | tr H0VT29 H0VT29_CAVPO | Uncharacterized protein (Fragment) OS=Cavia<br>porcellus GN=IDH3B PE=3 SV=1     | CAVPO | 14 |
| 395 | 24.94 | 25.1 | 26.28 | 24.06 | 16.35 | tr H0UW16 H0UW16_CAVPO | Uncharacterized protein (Fragment) OS=Cavia<br>porcellus GN=FAM120A PE=4 SV=1   | CAVPO | 15 |
| 396 | 24.94 | 29.3 | 69.39 | 69.39 | 68.98 | tr H0VW15 H0VW15_CAVPO | Uncharacterized protein OS=Cavia porcellus<br>GN=YWHAZ PE=3 SV=1                | CAVPO | 31 |
| 397 | 24.82 | 27.2 | 28.63 | 22.42 | 19.22 | tr H0VBE8 H0VBE8_CAVPO | Uncharacterized protein OS=Cavia porcellus<br>GN=NEFH PE=3 SV=1                 | CAVPO | 21 |
| 398 | 24.76 | 24.8 | 75.88 | 71.36 | 70.85 | tr H0W0H7 H0W0H7_CAVPO | Uncharacterized protein OS=Cavia porcellus<br>GN=TAGLN3 PE=4 SV=1               | CAVPO | 17 |
| 399 | 24.7  | 24.9 | 18.87 | 17.64 | 11.65 | tr H0VBA1 H0VBA1_CAVPO | Uncharacterized protein OS=Cavia porcellus<br>GN=SEC31A PE=4 SV=1               | CAVPO | 13 |

|     |       |      |       |       |       |                        |                                                                                                            |       |    |
|-----|-------|------|-------|-------|-------|------------------------|------------------------------------------------------------------------------------------------------------|-------|----|
| 400 | 24.68 | 24.7 | 61.44 | 47.46 | 47.46 | tr H0VJX7 H0VJX7_CAVPO | Uncharacterized protein OS=Cavia porcellus<br>GN=SRSF1 PE=4 SV=1                                           | CAVPO | 14 |
| 401 | 24.67 | 24.7 | 43.89 | 35.74 | 35.74 | tr H0V7V6 H0V7V6_CAVPO | Uncharacterized protein (Fragment) OS=Cavia<br>porcellus GN=AMPH PE=4 SV=1                                 | CAVPO | 14 |
| 402 | 24.65 | 24.7 | 55.99 | 50.14 | 42.34 | tr H0V8F0 H0V8F0_CAVPO | Uncharacterized protein OS=Cavia porcellus<br>GN=PDHB PE=4 SV=1                                            | CAVPO | 17 |
| 403 | 24.56 | 24.7 | 52.84 | 47.16 | 36.49 | tr H0VFF3 H0VFF3_CAVPO | Uncharacterized protein OS=Cavia porcellus<br>GN=PSMD11 PE=4 SV=1                                          | CAVPO | 12 |
| 404 | 24.54 | 24.7 | 35.94 | 31.45 | 24.93 | tr H0VIA6 H0VIA6_CAVPO | Uncharacterized protein OS=Cavia porcellus<br>GN=GUCY1A3 PE=3 SV=1                                         | CAVPO | 13 |
| 405 | 24.52 | 25.8 | 55.85 | 54.63 | 41.46 | tr H0VRI4 H0VRI4_CAVPO | Platelet-activating factor acetylhydrolase IB<br>subunit alpha OS=Cavia porcellus<br>GN=PAFAH1B1 PE=3 SV=1 | CAVPO | 12 |
| 406 | 24.51 | 24.6 | 48.16 | 48.16 | 43.48 | tr H0W5T5 H0W5T5_CAVPO | Uncharacterized protein OS=Cavia porcellus<br>GN=PHB2 PE=4 SV=1                                            | CAVPO | 12 |
| 407 | 24.48 | 24.6 | 44.28 | 39.4  | 38.09 | tr H0USZ7 H0USZ7_CAVPO | Uncharacterized protein OS=Cavia porcellus<br>GN=ALDH6A1 PE=3 SV=1                                         | CAVPO | 16 |
| 408 | 24.45 | 24.5 | 65.3  | 58.74 | 58.74 | tr H0UWH8 H0UWH8_CAVPO | Uncharacterized protein OS=Cavia porcellus<br>GN=IDH3A PE=3 SV=1                                           | CAVPO | 22 |
| 409 | 24.45 | 24.6 | 48.46 | 39.96 | 35.26 | tr H0VRF5 H0VRF5_CAVPO | Uncharacterized protein OS=Cavia porcellus<br>GN=PUF60 PE=4 SV=1                                           | CAVPO | 13 |
| 410 | 24.32 | 24.4 | 39.92 | 36.9  | 27.42 | tr H0V1B4 H0V1B4_CAVPO | Uncharacterized protein (Fragment) OS=Cavia<br>porcellus GN=TOM1L2 PE=4 SV=1                               | CAVPO | 13 |
| 411 | 24.27 | 24.3 | 34.84 | 31.12 | 31.12 | tr H0VYB6 H0VYB6_CAVPO | Uncharacterized protein OS=Cavia porcellus<br>GN=AGPAT3 PE=4 SV=1                                          | CAVPO | 14 |
| 412 | 24.15 | 24.2 | 69.31 | 68.81 | 68.32 | tr H0VQC2 H0VQC2_CAVPO | Uncharacterized protein (Fragment) OS=Cavia<br>porcellus GN=PRDX1 PE=4 SV=1                                | CAVPO | 21 |
| 413 | 24.14 | 24.8 | 43.97 | 41.38 | 40.52 | tr H0VKU4 H0VKU4_CAVPO | Uncharacterized protein OS=Cavia porcellus                                                                 | CAVPO | 17 |

|     |       |      |       |       |       |                        |                                                                                                          |       |    |
|-----|-------|------|-------|-------|-------|------------------------|----------------------------------------------------------------------------------------------------------|-------|----|
|     |       |      |       |       |       |                        | GN=ATP6V1H PE=4 SV=1                                                                                     |       |    |
| 414 | 24.12 | 28.2 | 50.54 | 50.54 | 46.77 | tr H0V7J4 H0V7J4_CAVPO | Histone H2A OS=Cavia porcellus<br>GN=H2AFY2 PE=3 SV=1                                                    | CAVPO | 16 |
| 415 | 24.04 | 24.1 | 55.32 | 48.14 | 46.01 | tr H0VIE4 H0VIE4_CAVPO | Uncharacterized protein OS=Cavia porcellus<br>GN=ACTR1A PE=3 SV=1                                        | CAVPO | 13 |
| 416 | 24.02 | 24   | 27.24 | 25    | 22.15 | tr H0UUD0 H0UUD0_CAVPO | Uncharacterized protein OS=Cavia porcellus<br>GN=SLC2A1 PE=3 SV=1                                        | CAVPO | 24 |
| 417 | 23.97 | 24   | 60    | 55.28 | 50    | tr H0V7F8 H0V7F8_CAVPO | Uncharacterized protein OS=Cavia porcellus<br>GN=PPP1R7 PE=4 SV=1                                        | CAVPO | 14 |
| 418 | 23.95 | 26   | 16.17 | 15.04 | 13.44 | tr H0VE70 H0VE70_CAVPO | Uncharacterized protein OS=Cavia porcellus<br>GN=GNAS PE=4 SV=1                                          | CAVPO | 16 |
| 419 | 23.91 | 26.2 | 30.5  | 24.45 | 20.14 | tr H0VA45 H0VA45_CAVPO | Uncharacterized protein OS=Cavia porcellus<br>GN=HSPH1 PE=3 SV=1                                         | CAVPO | 15 |
| 420 | 23.88 | 24   | 57.82 | 52.79 | 50.28 | tr H0VPB0 H0VPB0_CAVPO | Uncharacterized protein OS=Cavia porcellus<br>GN=RBM4B PE=4 SV=1                                         | CAVPO | 13 |
| 421 | 23.87 | 26.1 | 36.12 | 32.29 | 28.05 | tr H0V4E3 H0V4E3_CAVPO | Uncharacterized protein OS=Cavia porcellus<br>GN=TRAP1 PE=3 SV=1                                         | CAVPO | 14 |
| 422 | 23.84 | 23.9 | 33.18 | 31.61 | 27.7  | tr H0VJU8 H0VJU8_CAVPO | Acetyltransferase component of pyruvate<br>dehydrogenase complex OS=Cavia porcellus<br>GN=DLAT PE=3 SV=1 | CAVPO | 15 |
| 423 | 23.83 | 23.9 | 35.84 | 25.78 | 24.36 | tr H0VT81 H0VT81_CAVPO | Uncharacterized protein OS=Cavia porcellus<br>GN=ADD3 PE=4 SV=1                                          | CAVPO | 14 |
| 424 | 23.82 | 23.9 | 53.3  | 50.82 | 46.7  | tr H0W6E0 H0W6E0_CAVPO | Uncharacterized protein (Fragment) OS=Cavia<br>porcellus GN=VAT1 PE=4 SV=1                               | CAVPO | 15 |
| 425 | 23.7  | 23.8 | 49.42 | 49.42 | 49.42 | tr H0WC55 H0WC55_CAVPO | Uncharacterized protein OS=Cavia porcellus<br>GN=PRPH2 PE=4 SV=1                                         | CAVPO | 19 |
| 426 | 23.69 | 23.7 | 44.47 | 42.75 | 42.75 | tr H0VCH6 H0VCH6_CAVPO | Uncharacterized protein OS=Cavia porcellus<br>GN=CTSD PE=3 SV=1                                          | CAVPO | 15 |

|     |       |      |       |       |       |                        |                                                                                 |       |    |
|-----|-------|------|-------|-------|-------|------------------------|---------------------------------------------------------------------------------|-------|----|
| 427 | 23.69 | 23.7 | 68.81 | 68.81 | 63.86 | tr H0VUX6 H0VUX6_CAVPO | Uncharacterized protein (Fragment) OS=Cavia porcellus GN=GUK1 PE=4 SV=1         | CAVPO | 15 |
| 428 | 23.66 | 23.7 | 48.37 | 41.3  | 41.3  | tr H0UU43 H0UU43_CAVPO | Uncharacterized protein (Fragment) OS=Cavia porcellus GN=ADH5 PE=3 SV=1         | CAVPO | 16 |
| 429 | 23.66 | 23.8 | 69.59 | 61.15 | 61.15 | tr H0V3Y5 H0V3Y5_CAVPO | Uncharacterized protein (Fragment) OS=Cavia porcellus GN=LOC100723257 PE=3 SV=1 | CAVPO | 14 |
| 430 | 23.63 | 23.7 | 38.58 | 37.07 | 30.39 | tr H0V674 H0V674_CAVPO | Adenylyl cyclase-associated protein OS=Cavia porcellus GN=CAP1 PE=3 SV=1        | CAVPO | 12 |
| 431 | 23.61 | 23.7 | 36.96 | 36.96 | 35.02 | tr H0V8Z1 H0V8Z1_CAVPO | Uncharacterized protein OS=Cavia porcellus GN=SCRN1 PE=4 SV=1                   | CAVPO | 15 |
| 432 | 23.51 | 23.6 | 30.22 | 28.71 | 25.54 | tr H0V6J1 H0V6J1_CAVPO | Uncharacterized protein (Fragment) OS=Cavia porcellus GN=EIF3L PE=3 SV=1        | CAVPO | 13 |
| 433 | 23.49 | 23.6 | 54.63 | 51.42 | 41.4  | tr H0V1M7 H0V1M7_CAVPO | Uncharacterized protein (Fragment) OS=Cavia porcellus GN=PTBP2 PE=4 SV=1        | CAVPO | 14 |
| 434 | 23.46 | 23.5 | 48.92 | 43.61 | 39.04 | tr H0VBM4 H0VBM4_CAVPO | Uncharacterized protein OS=Cavia porcellus GN=APMAP PE=4 SV=1                   | CAVPO | 14 |
| 435 | 23.45 | 23.5 | 59.19 | 54.86 | 51.62 | tr H0V269 H0V269_CAVPO | Uncharacterized protein OS=Cavia porcellus GN=NSFL1C PE=4 SV=1                  | CAVPO | 14 |
| 436 | 23.41 | 23.4 | 56.18 | 54.31 | 46.82 | tr H0VSV5 H0VSV5_CAVPO | Proteasome subunit alpha type (Fragment) OS=Cavia porcellus GN=Psm1 PE=3 SV=1   | CAVPO | 12 |
| 437 | 23.41 | 29.7 | 72.94 | 68.53 | 68.53 | tr H0W2W3 H0W2W3_CAVPO | Uncharacterized protein OS=Cavia porcellus GN=GNB3 PE=4 SV=1                    | CAVPO | 21 |
| 438 | 23.4  | 26.1 | 67.25 | 63.76 | 60.7  | tr H0VEL1 H0VEL1_CAVPO | Uncharacterized protein (Fragment) OS=Cavia porcellus GN=GSTM3 PE=3 SV=1        | CAVPO | 16 |
| 439 | 23.36 | 23.4 | 65.61 | 65.08 | 65.08 | tr H0V8R3 H0V8R3_CAVPO | Uncharacterized protein OS=Cavia porcellus GN=PARK7 PE=4 SV=1                   | CAVPO | 19 |
| 440 | 23.32 | 23.4 | 39.44 | 30.85 | 20.14 | tr H0VLA8 H0VLA8_CAVPO | Uncharacterized protein OS=Cavia porcellus GN=PREP PE=4 SV=1                    | CAVPO | 12 |



|     |       |      |       |       |       |                        |                                                                                          |       |    |
|-----|-------|------|-------|-------|-------|------------------------|------------------------------------------------------------------------------------------|-------|----|
| 441 | 23.32 | 23.7 | 38.84 | 38.66 | 31.94 | tr H0VNC0 H0VNC0_CAVPO | Uncharacterized protein (Fragment) OS=Cavia porcellus GN=GRK7 PE=3 SV=1                  | CAVPO | 13 |
| 442 | 23.31 | 24.3 | 55.27 | 51.41 | 40.62 | tr H0WAK4 H0WAK4_CAVPO | Uncharacterized protein OS=Cavia porcellus GN=LOC101788057 PE=3 SV=1                     | CAVPO | 12 |
| 443 | 23.27 | 25.3 | 34.56 | 30.87 | 30.87 | tr H0VFS3 H0VFS3_CAVPO | Inosine-5'-monophosphate dehydrogenase (Fragment) OS=Cavia porcellus GN=IMPDH2 PE=3 SV=1 | CAVPO | 14 |
| 444 | 23.24 | 23.5 | 51.45 | 45.41 | 38.89 | tr H0VAM2 H0VAM2_CAVPO | Uncharacterized protein (Fragment) OS=Cavia porcellus GN=VAT1L PE=4 SV=1                 | CAVPO | 13 |
| 445 | 23.23 | 23.3 | 67.07 | 65.45 | 52.44 | tr H0V034 H0V034_CAVPO | Proteasome subunit alpha type OS=Cavia porcellus GN=PSMA6 PE=3 SV=1                      | CAVPO | 13 |
| 446 | 23.19 | 23.4 | 20.11 | 12.13 | 6.984 | tr H0V983 H0V983_CAVPO | Uncharacterized protein OS=Cavia porcellus GN=CKAP5 PE=4 SV=1                            | CAVPO | 12 |
| 447 | 23.18 | 23.4 | 44.47 | 38.83 | 32.1  | tr H0VDD0 H0VDD0_CAVPO | Uncharacterized protein (Fragment) OS=Cavia porcellus GN=RNH1 PE=4 SV=1                  | CAVPO | 14 |
| 448 | 23.07 | 23.2 | 74.32 | 74.32 | 74.32 | tr H0VKV0 H0VKV0_CAVPO | Uncharacterized protein (Fragment) OS=Cavia porcellus GN=Calm1 PE=4 SV=1                 | CAVPO | 33 |
| 449 | 23    | 25.4 | 48.01 | 45.8  | 29.87 | tr H0VCH1 H0VCH1_CAVPO | Isocitrate dehydrogenase [NADP] OS=Cavia porcellus GN=IDH2 PE=3 SV=1                     | NADP  | 14 |
| 450 | 22.99 | 23.1 | 46.4  | 32.36 | 21.23 | tr H0VLR8 H0VLR8_CAVPO | Malic enzyme OS=Cavia porcellus GN=ME2 PE=3 SV=1                                         | CAVPO | 11 |
| 451 | 22.97 | 23   | 36.18 | 36.18 | 36.18 | tr H0VD81 H0VD81_CAVPO | Uncharacterized protein OS=Cavia porcellus GN=Anp32a PE=4 SV=1                           | CAVPO | 21 |
| 452 | 22.93 | 23   | 65.74 | 65.12 | 63.58 | tr B5ABI3 B5ABI3_CAVPO | Uncharacterized protein OS=Cavia porcellus GN=YB1 PE=2 SV=1                              | CAVPO | 15 |
| 453 | 22.87 | 22.9 | 51.12 | 50.37 | 45.66 | tr H0UUS6 H0UUS6_CAVPO | Uncharacterized protein (Fragment) OS=Cavia porcellus GN=ACTR3 PE=3 SV=1                 | CAVPO | 12 |
| 454 | 22.84 | 22.9 | 52.35 | 45.13 | 42.6  | tr H0W9R6 H0W9R6_CAVPO | Uncharacterized protein OS=Cavia porcellus                                               | CAVPO | 12 |

|     |       |      |       |       |       |                        |                                                                                                        |       |    |
|-----|-------|------|-------|-------|-------|------------------------|--------------------------------------------------------------------------------------------------------|-------|----|
|     |       |      |       |       |       |                        | GN=IMPA1 PE=4 SV=1                                                                                     |       |    |
| 455 | 22.81 | 22.9 | 51.45 | 47.91 | 42.44 | tr H0V615 H0V615_CAVPO | Uncharacterized protein OS=Cavia porcellus<br>GN=NAPG PE=4 SV=1                                        | CAVPO | 12 |
| 456 | 22.78 | 22.8 | 45.15 | 38.5  | 36.57 | tr H0VJK3 H0VJK3_CAVPO | Uncharacterized protein OS=Cavia porcellus<br>GN=SLC25A3 PE=3 SV=1                                     | CAVPO | 20 |
| 457 | 22.77 | 22.9 | 31.62 | 20.29 | 17    | tr H0VA86 H0VA86_CAVPO | Uncharacterized protein OS=Cavia porcellus<br>GN=CUL4A PE=3 SV=1                                       | CAVPO | 11 |
| 458 | 22.73 | 22.8 | 33.93 | 27.78 | 27.78 | tr H0VKG3 H0VKG3_CAVPO | Uncharacterized protein OS=Cavia porcellus<br>GN=API5 PE=4 SV=1                                        | CAVPO | 12 |
| 459 | 22.73 | 22.8 | 22.45 | 18.3  | 16.28 | tr H0VP57 H0VP57_CAVPO | Uncharacterized protein OS=Cavia porcellus<br>GN=IPO7 PE=4 SV=1                                        | CAVPO | 12 |
| 460 | 22.63 | 22.7 | 54.46 | 54.46 | 51.49 | tr H0VZ24 H0VZ24_CAVPO | 6-phosphogluconate dehydrogenase,<br>decarboxylating (Fragment) OS=Cavia<br>porcellus GN=PGD PE=3 SV=1 | CAVPO | 13 |
| 461 | 22.62 | 23.1 | 56.19 | 53.65 | 42.86 | tr H0V0K2 H0V0K2_CAVPO | Uncharacterized protein OS=Cavia porcellus<br>GN=EIF2S1 PE=4 SV=1                                      | CAVPO | 12 |
| 462 | 22.52 | 22.6 | 34.83 | 29.96 | 23.03 | tr H0VSM1 H0VSM1_CAVPO | Uncharacterized protein OS=Cavia porcellus<br>GN=PSMD3 PE=4 SV=1                                       | CAVPO | 10 |
| 463 | 22.45 | 22.6 | 47.56 | 37.04 | 29.82 | tr H0V7A0 H0V7A0_CAVPO | Uncharacterized protein OS=Cavia porcellus<br>GN=SMU1 PE=4 SV=1                                        | CAVPO | 13 |
| 464 | 22.36 | 22.4 | 54.04 | 54.04 | 51.55 | tr H0V9K1 H0V9K1_CAVPO | Uncharacterized protein (Fragment) OS=Cavia<br>porcellus GN=PDXK PE=4 SV=1                             | CAVPO | 13 |
| 465 | 22.35 | 56.6 | 46.16 | 40.51 | 35.5  | tr H0V545 H0V545_CAVPO | Uncharacterized protein OS=Cavia porcellus<br>GN=AP1B1 PE=4 SV=1                                       | CAVPO | 30 |
| 466 | 22.31 | 22.4 | 51.5  | 45.96 | 34.64 | tr H0VW72 H0VW72_CAVPO | Uncharacterized protein OS=Cavia porcellus<br>GN=PSMC2 PE=3 SV=1                                       | CAVPO | 13 |
| 467 | 22.3  | 22.3 | 40.67 | 40.67 | 31.91 | tr H0VHQ8 H0VHQ8_CAVPO | Uncharacterized protein (Fragment) OS=Cavia<br>porcellus GN=PDIA6 PE=3 SV=1                            | CAVPO | 12 |

|     |       |      |       |       |       |                        |                                                                                             |       |    |
|-----|-------|------|-------|-------|-------|------------------------|---------------------------------------------------------------------------------------------|-------|----|
| 468 | 22.3  | 22.4 | 31.57 | 26.29 | 22.14 | tr H0VWP6 H0VWP6_CAVPO | Uncharacterized protein (Fragment) OS=Cavia porcellus GN=CAPN2 PE=4 SV=1                    | CAVPO | 11 |
| 469 | 22.29 | 22.5 | 23.74 | 17.04 | 14.78 | tr H0V2G0 H0V2G0_CAVPO | Uncharacterized protein OS=Cavia porcellus GN=CCAR1 PE=4 SV=1                               | CAVPO | 14 |
| 470 | 22.22 | 22.3 | 31.53 | 28.83 | 28.83 | tr H0W767 H0W767_CAVPO | Uncharacterized protein (Fragment) OS=Cavia porcellus GN=RANBP3 PE=4 SV=1                   | CAVPO | 13 |
| 471 | 22.18 | 22.2 | 43.11 | 37.11 | 37.11 | tr H0V542 H0V542_CAVPO | Uncharacterized protein (Fragment) OS=Cavia porcellus GN=Gsr PE=4 SV=1                      | CAVPO | 12 |
| 472 | 22.16 | 22.3 | 33.83 | 28.8  | 23.04 | tr H0VMW5 H0VMW5_CAVPO | Uncharacterized protein OS=Cavia porcellus GN=RGS9 PE=4 SV=1                                | CAVPO | 15 |
| 473 | 22.13 | 22.3 | 72.02 | 67.49 | 52.67 | tr H0V3N5 H0V3N5_CAVPO | Uncharacterized protein OS=Cavia porcellus GN=Rps3 PE=3 SV=1                                | CAVPO | 11 |
| 474 | 22.08 | 22.2 | 47.59 | 44.48 | 43.91 | tr H0W951 H0W951_CAVPO | Uncharacterized protein OS=Cavia porcellus GN=PRMT1 PE=4 SV=1                               | CAVPO | 13 |
| 475 | 22.04 | 23.2 | 50.64 | 46.8  | 36.83 | tr H0V659 H0V659_CAVPO | Uncharacterized protein OS=Cavia porcellus GN=Csnk2a1 PE=4 SV=1                             | CAVPO | 12 |
| 476 | 22.03 | 22   | 70.83 | 65.83 | 65.83 | tr H0VZK8 H0VZK8_CAVPO | Uncharacterized protein (Fragment) OS=Cavia porcellus GN=DDAH1 PE=4 SV=1                    | CAVPO | 12 |
| 477 | 22    | 22   | 54.05 | 51.13 | 51.13 | tr H0V4U3 H0V4U3_CAVPO | Serine/threonine-protein phosphatase OS=Cavia porcellus GN=PPP2CA PE=3 SV=1                 | CAVPO | 13 |
| 478 | 22    | 22.1 | 43.55 | 39.52 | 36.69 | tr H0W1D6 H0W1D6_CAVPO | Uncharacterized protein OS=Cavia porcellus GN=TPM3 PE=3 SV=1                                | CAVPO | 12 |
| 479 | 21.94 | 22   | 63.21 | 43.63 | 37.74 | tr Q8K1W3 Q8K1W3_CAVPO | Interphotoreceptor retinoid binding protein (Fragment) OS=Cavia porcellus GN=irbp PE=4 SV=1 | CAVPO | 12 |
| 480 | 21.86 | 21.9 | 63.76 | 63.76 | 63.3  | tr H0UYR4 H0UYR4_CAVPO | Uncharacterized protein (Fragment) OS=Cavia porcellus GN=HPRT1 PE=4 SV=1                    | CAVPO | 12 |
| 481 | 21.84 | 22   | 30.98 | 25.84 | 19.26 | tr H0VKJ2 H0VKJ2_CAVPO | Lysine--tRNA ligase OS=Cavia porcellus                                                      | CAVPO | 11 |

|     |       |      |       |       |       |                        |                                                                          |       |    |
|-----|-------|------|-------|-------|-------|------------------------|--------------------------------------------------------------------------|-------|----|
|     |       |      |       |       |       |                        | GN=KARS PE=3 SV=1                                                        |       |    |
| 482 | 21.82 | 21.9 | 47.42 | 41.8  | 33.03 | tr H0VA43 H0VA43_CAVPO | Uncharacterized protein (Fragment) OS=Cavia porcellus GN=ERO1L PE=4 SV=1 | CAVPO | 12 |
| 483 | 21.8  | 22.5 | 49.38 | 41.94 | 33.26 | tr H0V3H0 H0V3H0_CAVPO | Serine hydroxymethyltransferase OS=Cavia porcellus GN=SHMT1 PE=1 SV=1    | CAVPO | 12 |
| 484 | 21.8  | 21.9 | 31.36 | 31.36 | 28.14 | tr H0VU30 H0VU30_CAVPO | Uncharacterized protein OS=Cavia porcellus GN=NT5C2 PE=3 SV=1            | CAVPO | 13 |
| 485 | 21.79 | 22.2 | 57.64 | 53.38 | 34.84 | tr H0VEM1 H0VEM1_CAVPO | Uncharacterized protein OS=Cavia porcellus GN=LANCL1 PE=4 SV=1           | CAVPO | 16 |
| 486 | 21.77 | 21.9 | 34.33 | 24.84 | 18.35 | tr H0W9W4 H0W9W4_CAVPO | Uncharacterized protein (Fragment) OS=Cavia porcellus GN=RRBP1 PE=4 SV=1 | CAVPO | 13 |
| 487 | 21.7  | 21.8 | 36.76 | 24.87 | 18.86 | tr H0V5X7 H0V5X7_CAVPO | Uncharacterized protein OS=Cavia porcellus GN=DDX42 PE=3 SV=1            | CAVPO | 12 |
| 488 | 21.69 | 21.7 | 31.49 | 31.23 | 30.98 | tr H0VNZ8 H0VNZ8_CAVPO | Uncharacterized protein OS=Cavia porcellus GN=NPTN PE=4 SV=1             | CAVPO | 13 |
| 489 | 21.67 | 22   | 73.16 | 65.81 | 50    | tr H0UTX5 H0UTX5_CAVPO | Uncharacterized protein OS=Cavia porcellus GN=PHB PE=4 SV=1              | CAVPO | 12 |
| 490 | 21.67 | 21.7 | 41.87 | 34.52 | 32.94 | tr H0VQT4 H0VQT4_CAVPO | Uncharacterized protein (Fragment) OS=Cavia porcellus GN=HDAC2 PE=4 SV=1 | CAVPO | 13 |
| 491 | 21.62 | 21.8 | 49.65 | 45.41 | 42.35 | tr H0VT57 H0VT57_CAVPO | Uncharacterized protein OS=Cavia porcellus GN=Rbbp4 PE=4 SV=1            | CAVPO | 15 |
| 492 | 21.6  | 21.8 | 20.02 | 15.64 | 10.51 | tr H0V477 H0V477_CAVPO | Uncharacterized protein (Fragment) OS=Cavia porcellus GN=Nomo1 PE=4 SV=1 | CAVPO | 10 |
| 493 | 21.57 | 21.6 | 74.7  | 65.06 | 65.06 | tr H0VBH0 H0VBH0_CAVPO | Uncharacterized protein (Fragment) OS=Cavia porcellus GN=CFL1 PE=4 SV=1  | CAVPO | 12 |
| 494 | 21.42 | 21.5 | 32.41 | 28.01 | 26.71 | tr H0VP14 H0VP14_CAVPO | Uncharacterized protein OS=Cavia porcellus GN=AIFM1 PE=4 SV=1            | CAVPO | 12 |

|     |       |      |       |       |       |                        |                                                                                                |       |    |
|-----|-------|------|-------|-------|-------|------------------------|------------------------------------------------------------------------------------------------|-------|----|
| 495 | 21.41 | 21.6 | 28.84 | 24.43 | 21.02 | tr H0VB69 H0VB69_CAVPO | Mitochondrial Rho GTPase OS=Cavia porcellus GN=RHOT1 PE=3 SV=1                                 | CAVPO | 12 |
| 496 | 21.36 | 21.4 | 53.85 | 47.93 | 47.93 | tr H0W737 H0W737_CAVPO | Uncharacterized protein OS=Cavia porcellus GN=COX4I1 PE=4 SV=1                                 | CAVPO | 14 |
| 497 | 21.35 | 21.4 | 34.69 | 33.39 | 29.7  | tr H0V1J1 H0V1J1_CAVPO | Uncharacterized protein OS=Cavia porcellus GN=TERF2 PE=4 SV=1                                  | CAVPO | 12 |
| 498 | 21.35 | 21.4 | 43.19 | 35.73 | 30.85 | tr H0V759 H0V759_CAVPO | Uncharacterized protein OS=Cavia porcellus GN=PSMD6 PE=4 SV=1                                  | CAVPO | 11 |
| 499 | 21.33 | 21.4 | 15.98 | 14.83 | 12.16 | tr H0V7Q6 H0V7Q6_CAVPO | Uncharacterized protein OS=Cavia porcellus GN=NRCAM PE=4 SV=1                                  | CAVPO | 10 |
| 500 | 21.31 | 21.5 | 46.77 | 38.75 | 23.87 | tr H0W849 H0W849_CAVPO | Uncharacterized protein (Fragment) OS=Cavia porcellus GN=ARCN1 PE=4 SV=1                       | CAVPO | 9  |
| 501 | 21.26 | 21.4 | 22.35 | 18.16 | 12.68 | tr H0V0S3 H0V0S3_CAVPO | Uncharacterized protein OS=Cavia porcellus GN=SEC24C PE=4 SV=1                                 | CAVPO | 10 |
| 502 | 21.23 | 21.3 | 49.04 | 41.4  | 41.4  | tr H0V4G6 H0V4G6_CAVPO | Uncharacterized protein OS=Cavia porcellus GN=SLC25A11 PE=3 SV=1                               | CAVPO | 12 |
| 503 | 21.2  | 21.3 | 18.7  | 14.52 | 11.7  | tr H0VFP3 H0VFP3_CAVPO | Uncharacterized protein (Fragment) OS=Cavia porcellus GN=XPO5 PE=4 SV=1                        | CAVPO | 12 |
| 504 | 21.18 | 21.3 | 71.68 | 69.58 | 63.64 | tr Q07E10 Q07E10_CAVPO | Capping protein (Actin filament) muscle Z-line, alpha 2 OS=Cavia porcellus GN=CAPZA2 PE=4 SV=1 | CAVPO | 12 |
| 505 | 21.17 | 21.2 | 24.01 | 21.01 | 19.24 | tr H0VPQ2 H0VPQ2_CAVPO | Uncharacterized protein OS=Cavia porcellus GN=LSS PE=4 SV=1                                    | CAVPO | 11 |
| 506 | 21.16 | 21.2 | 46.48 | 44.79 | 40    | tr H0VG68 H0VG68_CAVPO | Uncharacterized protein OS=Cavia porcellus GN=NDUFA10 PE=4 SV=1                                | CAVPO | 10 |
| 507 | 21.16 | 21.2 | 35.97 | 32.91 | 32.91 | tr H0VKB7 H0VKB7_CAVPO | Uncharacterized protein OS=Cavia porcellus GN=Luc712 PE=4 SV=1                                 | CAVPO | 11 |
| 508 | 21.14 | 21.2 | 20.26 | 14.92 | 11.46 | tr H0VD57 H0VD57_CAVPO | Uncharacterized protein OS=Cavia porcellus                                                     | CAVPO | 12 |

|     |       |      |       |       |       |                        |                                                                                              |       |    |
|-----|-------|------|-------|-------|-------|------------------------|----------------------------------------------------------------------------------------------|-------|----|
|     |       |      |       |       |       |                        | GN=NUP155 PE=4 SV=1                                                                          |       |    |
| 509 | 21.07 | 21.1 | 50    | 50    | 46.75 | tr H0V181 H0V181_CAVPO | Uncharacterized protein OS=Cavia porcellus<br>GN=BPNT1 PE=4 SV=1                             | CAVPO | 11 |
| 510 | 21.03 | 23.4 | 35.09 | 31.32 | 20.94 | tr H0VJK0 H0VJK0_CAVPO | Adenosylhomocysteinase OS=Cavia porcellus<br>GN=AHCYL1 PE=3 SV=1                             | CAVPO | 11 |
| 511 | 20.97 | 23   | 51.66 | 51.29 | 46.13 | tr H0VGS0 H0VGS0_CAVPO | Uncharacterized protein OS=Cavia porcellus<br>GN=CALB2 PE=4 SV=1                             | CAVPO | 20 |
| 512 | 20.95 | 21.1 | 45.29 | 34.86 | 29.26 | tr H0UZY7 H0UZY7_CAVPO | Uncharacterized protein OS=Cavia porcellus<br>GN=MAP2K1 PE=4 SV=1                            | CAVPO | 13 |
| 513 | 20.93 | 21   | 57.06 | 52.35 | 45.15 | tr H0VPA8 H0VPA8_CAVPO | Uncharacterized protein (Fragment) OS=Cavia<br>porcellus GN=SEPT2 PE=3 SV=1                  | CAVPO | 13 |
| 514 | 20.92 | 21   | 44.21 | 38.14 | 28.27 | tr H0VLR7 H0VLR7_CAVPO | Catalase OS=Cavia porcellus GN=Mip PE=3<br>SV=1                                              | CAVPO | 12 |
| 515 | 20.91 | 21   | 39.71 | 37.8  | 32.3  | tr H0W5L8 H0W5L8_CAVPO | Uncharacterized protein OS=Cavia porcellus<br>GN=SERPINH1 PE=3 SV=1                          | CAVPO | 12 |
| 516 | 20.9  | 20.9 | 32.37 | 32.37 | 32.37 | tr H0V2J0 H0V2J0_CAVPO | Uncharacterized protein (Fragment) OS=Cavia<br>porcellus GN=NCEH1 PE=4 SV=1                  | CAVPO | 11 |
| 517 | 20.84 | 20.9 | 36.38 | 34.32 | 31.12 | tr H0VFI7 H0VFI7_CAVPO | Serine/threonine-protein phosphatase<br>(Fragment) OS=Cavia porcellus GN=PPP3CA<br>PE=3 SV=1 | CAVPO | 13 |
| 518 | 20.77 | 20.8 | 70.83 | 65.1  | 65.1  | tr H0V534 H0V534_CAVPO | Uncharacterized protein (Fragment) OS=Cavia<br>porcellus GN=AK1 PE=3 SV=1                    | CAVPO | 11 |
| 519 | 20.71 | 20.8 | 47.15 | 47.15 | 47.15 | tr H0VH33 H0VH33_CAVPO | Uncharacterized protein (Fragment) OS=Cavia<br>porcellus GN=ERP29 PE=4 SV=1                  | CAVPO | 12 |
| 520 | 20.69 | 20.9 | 24.84 | 12.82 | 11.39 | tr H0V7G7 H0V7G7_CAVPO | Uncharacterized protein OS=Cavia porcellus<br>GN=HDLBP PE=4 SV=1                             | CAVPO | 11 |
| 521 | 20.69 | 20.8 | 49.59 | 39.84 | 39.84 | tr H0VCJ0 H0VCJ0_CAVPO | Uncharacterized protein OS=Cavia porcellus<br>GN=BCAP31 PE=4 SV=1                            | CAVPO | 12 |

|     |       |      |       |       |       |                        |                                                                                    |       |    |
|-----|-------|------|-------|-------|-------|------------------------|------------------------------------------------------------------------------------|-------|----|
| 522 | 20.68 | 20.8 | 36.53 | 35.13 | 28.54 | tr H0VCU8 H0VCU8_CAVPO | Uncharacterized protein OS=Cavia porcellus<br>GN=SF3A3 PE=4 SV=1                   | CAVPO | 13 |
| 523 | 20.65 | 30.8 | 32.54 | 30.74 | 28.35 | tr H0V4A5 H0V4A5_CAVPO | Uncharacterized protein (Fragment) OS=Cavia<br>porcellus GN=LOC100724384 PE=4 SV=1 | CAVPO | 19 |
| 524 | 20.64 | 21.7 | 27.2  | 21.54 | 19.93 | tr H0UXL7 H0UXL7_CAVPO | Uncharacterized protein OS=Cavia porcellus<br>GN=BAG6 PE=4 SV=1                    | CAVPO | 13 |
| 525 | 20.63 | 20.8 | 22.68 | 19.95 | 13.3  | tr H0V7I9 H0V7I9_CAVPO | Uncharacterized protein (Fragment) OS=Cavia<br>porcellus GN=PC PE=3 SV=1           | CAVPO | 10 |
| 526 | 20.59 | 20.8 | 31.22 | 25.34 | 18.55 | tr H0V7G5 H0V7G5_CAVPO | Uncharacterized protein (Fragment) OS=Cavia<br>porcellus GN=GBE1 PE=4 SV=1         | CAVPO | 12 |
| 527 | 20.57 | 20.7 | 30    | 24.86 | 16.62 | tr H0V4I3 H0V4I3_CAVPO | Uncharacterized protein OS=Cavia porcellus<br>GN=DCLK1 PE=4 SV=1                   | CAVPO | 12 |
| 528 | 20.5  | 20.6 | 49.53 | 47.35 | 42.99 | tr H0UWE9 H0UWE9_CAVPO | Uncharacterized protein OS=Cavia porcellus<br>GN=SLC25A22 PE=3 SV=1                | CAVPO | 12 |
| 529 | 20.5  | 20.5 | 55.99 | 55.99 | 55.99 | tr H0VP58 H0VP58_CAVPO | Uncharacterized protein OS=Cavia porcellus<br>GN=COPE PE=4 SV=1                    | CAVPO | 12 |
| 530 | 20.48 | 21.6 | 25.75 | 18.35 | 11.26 | tr H0UUX4 H0UUX4_CAVPO | Uncharacterized protein OS=Cavia porcellus<br>GN=VAR5 PE=3 SV=1                    | CAVPO | 11 |
| 531 | 20.48 | 20.5 | 80.47 | 72.56 | 66.98 | tr H0V8C8 H0V8C8_CAVPO | Uncharacterized protein OS=Cavia porcellus<br>GN=RAB14 PE=3 SV=1                   | CAVPO | 14 |
| 532 | 20.47 | 22.5 | 64.16 | 55.2  | 53.18 | tr H0V7P5 H0V7P5_CAVPO | Uncharacterized protein OS=Cavia porcellus<br>GN=HNRNPH3 PE=4 SV=1                 | CAVPO | 13 |
| 533 | 20.44 | 20.5 | 29.7  | 28.04 | 26.75 | tr H0V5J4 H0V5J4_CAVPO | Uncharacterized protein (Fragment) OS=Cavia<br>porcellus GN=IGF2BP2 PE=4 SV=1      | CAVPO | 11 |
| 534 | 20.43 | 20.6 | 21.05 | 14.86 | 9.677 | tr H0VL70 H0VL70_CAVPO | Uncharacterized protein (Fragment) OS=Cavia<br>porcellus GN=LARS PE=3 SV=1         | CAVPO | 9  |
| 535 | 20.41 | 20.5 | 39.27 | 33.2  | 28.54 | tr H0VN88 H0VN88_CAVPO | Uncharacterized protein OS=Cavia porcellus<br>GN=GPHN PE=4 SV=1                    | CAVPO | 11 |

|     |       |      |       |       |       |                        |                                                                                       |       |    |
|-----|-------|------|-------|-------|-------|------------------------|---------------------------------------------------------------------------------------|-------|----|
| 536 | 20.39 | 20.6 | 7.271 | 2.698 | 1.772 | tr H0VC35 H0VC35_CAVPO | Uncharacterized protein (Fragment) OS=Cavia porcellus GN=SYNE1 PE=4 SV=1              | CAVPO | 11 |
| 537 | 20.36 | 20.5 | 33.83 | 32.15 | 28.97 | tr H0UUF3 H0UUF3_CAVPO | Uncharacterized protein OS=Cavia porcellus GN=TROVE2 PE=4 SV=1                        | CAVPO | 12 |
| 538 | 20.36 | 20.5 | 32.21 | 28.46 | 26.88 | tr Q99NA8 Q99NA8_CAVPO | Putative monoamine oxidase A (Fragment) OS=Cavia porcellus GN=MAO-A PE=2 SV=1         | CAVPO | 12 |
| 539 | 20.35 | 20.5 | 36.89 | 31.77 | 23.45 | tr H0V874 H0V874_CAVPO | Uncharacterized protein OS=Cavia porcellus GN=RUFY3 PE=4 SV=1                         | CAVPO | 11 |
| 540 | 20.35 | 20.4 | 32.58 | 25.44 | 20.56 | tr H0VMS7 H0VMS7_CAVPO | Microtubule-associated protein (Fragment) OS=Cavia porcellus GN=MAPT PE=3 SV=1        | CAVPO | 12 |
| 541 | 20.29 | 20.5 | 37.82 | 32.63 | 23.21 | tr H0W345 H0W345_CAVPO | Uncharacterized protein OS=Cavia porcellus GN=KLC1 PE=4 SV=1                          | CAVPO | 13 |
| 542 | 20.23 | 20.3 | 54.13 | 54.13 | 54.13 | tr H0W9A0 H0W9A0_CAVPO | Uncharacterized protein OS=Cavia porcellus GN=RAB11B PE=3 SV=1                        | CAVPO | 11 |
| 543 | 20.19 | 20.2 | 74.45 | 72.99 | 69.34 | tr H0UWI7 H0UWI7_CAVPO | Uncharacterized protein OS=Cavia porcellus GN=CRABP1 PE=3 SV=1                        | CAVPO | 12 |
| 544 | 20.17 | 20.2 | 34.84 | 26.97 | 24.61 | tr H0VCE7 H0VCE7_CAVPO | Uncharacterized protein (Fragment) OS=Cavia porcellus GN=UGP2 PE=4 SV=1               | CAVPO | 10 |
| 545 | 20.15 | 20.3 | 19.62 | 14.99 | 10.72 | tr H0VK83 H0VK83_CAVPO | Uncharacterized protein (Fragment) OS=Cavia porcellus GN=NCKAP1 PE=4 SV=1             | CAVPO | 10 |
| 546 | 20.14 | 20.2 | 21.58 | 19.09 | 19.09 | tr H0W523 H0W523_CAVPO | Uncharacterized protein OS=Cavia porcellus GN=SLC16A1 PE=4 SV=1                       | CAVPO | 19 |
| 547 | 20.09 | 20.2 | 33.07 | 28.84 | 23.82 | tr H0VRW8 H0VRW8_CAVPO | Uncharacterized protein OS=Cavia porcellus GN=DYNC1I2 PE=4 SV=1                       | CAVPO | 10 |
| 548 | 20.08 | 20.2 | 48.22 | 45.27 | 45.27 | tr H0VA29 H0VA29_CAVPO | Delta-aminolevulinic acid dehydratase (Fragment) OS=Cavia porcellus GN=ALAD PE=3 SV=1 | CAVPO | 13 |
| 549 | 20.07 | 20.1 | 56.97 | 56.97 | 50.82 | tr H0UVY4 H0UVY4_CAVPO | Uncharacterized protein OS=Cavia porcellus                                            | CAVPO | 10 |



|     |       |      |       |       |       |                          |                                                                              |       |    |
|-----|-------|------|-------|-------|-------|--------------------------|------------------------------------------------------------------------------|-------|----|
|     |       |      |       |       |       |                          | GN=C14orf166 PE=4 SV=1                                                       |       |    |
| 550 | 20    | 20   | 53.37 | 53.37 | 53.37 | tr H0UY7P7 H0UY7P7_CAVPO | Uncharacterized protein OS=Cavia porcellus<br>GN=HPCA PE=4 SV=1              | CAVPO | 10 |
| 551 | 20    | 20   | 66.03 | 66.03 | 66.03 | tr H0V278 H0V278_CAVPO   | Uncharacterized protein OS=Cavia porcellus<br>GN=ATP5H PE=4 SV=1             | CAVPO | 12 |
| 552 | 19.9  | 20   | 28.44 | 23.67 | 14    | tr H0VMF1 H0VMF1_CAVPO   | Uncharacterized protein OS=Cavia porcellus<br>GN=MARS PE=3 SV=1              | CAVPO | 10 |
| 553 | 19.9  | 20   | 45.7  | 43.32 | 36.8  | tr H0W1P5 H0W1P5_CAVPO   | Uncharacterized protein (Fragment) OS=Cavia<br>porcellus GN=PRKACA PE=4 SV=1 | CAVPO | 11 |
| 554 | 19.88 | 19.9 | 43.52 | 37.72 | 31.91 | tr H0VN31 H0VN31_CAVPO   | Uncharacterized protein OS=Cavia porcellus<br>GN=SLC3A2 PE=4 SV=1            | CAVPO | 13 |
| 555 | 19.84 | 19.9 | 50.48 | 46.03 | 45.4  | tr H0VGC8 H0VGC8_CAVPO   | Uncharacterized protein OS=Cavia porcellus<br>GN=Calu PE=4 SV=1              | CAVPO | 12 |
| 556 | 19.84 | 19.9 | 33.97 | 30.53 | 24.81 | tr H0VJK8 H0VJK8_CAVPO   | Uncharacterized protein OS=Cavia porcellus<br>GN=DYNC1LI1 PE=4 SV=1          | CAVPO | 10 |
| 557 | 19.84 | 20   | 53.96 | 37.13 | 34.16 | tr H0W511 H0W511_CAVPO   | Uncharacterized protein OS=Cavia porcellus<br>GN=COPS4 PE=4 SV=1             | CAVPO | 10 |
| 558 | 19.82 | 19.9 | 56.2  | 45.74 | 45.74 | tr H0VCY8 H0VCY8_CAVPO   | Uncharacterized protein (Fragment) OS=Cavia<br>porcellus GN=Rpsa PE=3 SV=1   | CAVPO | 12 |
| 559 | 19.77 | 19.9 | 25.98 | 19.08 | 15.75 | tr H0VX70 H0VX70_CAVPO   | Coatomer subunit gamma OS=Cavia porcellus<br>GN=COPG1 PE=3 SV=1              | CAVPO | 11 |
| 560 | 19.73 | 52.3 | 50.78 | 41.93 | 33.97 | tr H0UVG6 H0UVG6_CAVPO   | Uncharacterized protein OS=Cavia porcellus<br>GN=ACTN1 PE=4 SV=1             | CAVPO | 26 |
| 561 | 19.73 | 19.8 | 42.34 | 42.34 | 32.31 | tr H0UVW8 H0UVW8_CAVPO   | Uncharacterized protein OS=Cavia porcellus<br>GN=NANS PE=4 SV=1              | CAVPO | 13 |
| 562 | 19.7  | 21.9 | 28.45 | 28.45 | 20.17 | tr H0V628 H0V628_CAVPO   | Uncharacterized protein OS=Cavia porcellus<br>GN=ADD2 PE=4 SV=1              | CAVPO | 11 |

|     |       |      |       |       |       |                        |                                                                                   |       |    |
|-----|-------|------|-------|-------|-------|------------------------|-----------------------------------------------------------------------------------|-------|----|
| 563 | 19.69 | 19.8 | 30.7  | 28.19 | 22.8  | tr H0VA38 H0VA38_CAVPO | Uncharacterized protein OS=Cavia porcellus<br>GN=NT5DC2 PE=3 SV=1                 | CAVPO | 10 |
| 564 | 19.67 | 19.8 | 36.06 | 29.82 | 26.12 | tr H0VXY7 H0VXY7_CAVPO | Uncharacterized protein (Fragment) OS=Cavia<br>porcellus GN=PRKCSH PE=4 SV=1      | CAVPO | 10 |
| 565 | 19.63 | 19.7 | 72.78 | 65.82 | 64.56 | tr H0W0N2 H0W0N2_CAVPO | Uncharacterized protein OS=Cavia porcellus<br>GN=CPLX3 PE=4 SV=1                  | CAVPO | 11 |
| 566 | 19.59 | 19.6 | 32.04 | 29.18 | 27.35 | tr H0VUD6 H0VUD6_CAVPO | Microtubule-associated protein (Fragment)<br>OS=Cavia porcellus GN=MAP4 PE=3 SV=1 | CAVPO | 11 |
| 567 | 19.57 | 19.6 | 54.46 | 52.92 | 51.08 | tr H0UV39 H0UV39_CAVPO | Uncharacterized protein (Fragment) OS=Cavia<br>porcellus GN=SFXN3 PE=4 SV=1       | CAVPO | 11 |
| 568 | 19.54 | 19.6 | 50.59 | 41.57 | 41.57 | tr H0VB82 H0VB82_CAVPO | Uncharacterized protein OS=Cavia porcellus<br>GN=ETFB PE=4 SV=1                   | CAVPO | 10 |
| 569 | 19.51 | 19.9 | 43.64 | 41.95 | 26.27 | tr H0VJ25 H0VJ25_CAVPO | mRNA cap guanine-N7 methyltransferase<br>OS=Cavia porcellus GN=RNMT PE=3 SV=1     | CAVPO | 10 |
| 570 | 19.5  | 19.6 | 39.5  | 37.7  | 30.93 | tr H0V0W1 H0V0W1_CAVPO | Uncharacterized protein OS=Cavia porcellus<br>GN=COPS2 PE=4 SV=1                  | CAVPO | 11 |
| 571 | 19.5  | 19.6 | 42.95 | 41.03 | 38.14 | tr H0VTB9 H0VTB9_CAVPO | Uncharacterized protein OS=Cavia porcellus<br>GN=HSD17B12 PE=3 SV=1               | CAVPO | 10 |
| 572 | 19.48 | 30.6 | 40.23 | 24.87 | 18.7  | tr H0W2U4 H0W2U4_CAVPO | Uncharacterized protein OS=Cavia porcellus<br>GN=KIF5C PE=4 SV=1                  | CAVPO | 15 |
| 573 | 19.46 | 19.5 | 47.81 | 43.96 | 41.13 | tr H0V6E6 H0V6E6_CAVPO | Uncharacterized protein (Fragment) OS=Cavia<br>porcellus GN=ILF2 PE=4 SV=1        | CAVPO | 10 |
| 574 | 19.43 | 19.6 | 56.5  | 53.25 | 46.75 | tr H0UTH1 H0UTH1_CAVPO | Phosphomannomutase OS=Cavia porcellus<br>GN=PMM2 PE=3 SV=1                        | CAVPO | 12 |
| 575 | 19.43 | 25.5 | 55.93 | 55.93 | 55.93 | tr H0VIX2 H0VIX2_CAVPO | Uncharacterized protein OS=Cavia porcellus<br>GN=YWHAQ PE=3 SV=1                  | CAVPO | 19 |
| 576 | 19.38 | 19.6 | 35.12 | 30.62 | 28.2  | tr H0VFU0 H0VFU0_CAVPO | Uncharacterized protein (Fragment) OS=Cavia<br>porcellus GN=DAK PE=4 SV=1         | CAVPO | 10 |

|     |       |      |       |       |       |                        |                                                                           |       |    |
|-----|-------|------|-------|-------|-------|------------------------|---------------------------------------------------------------------------|-------|----|
| 577 | 19.37 | 22.5 | 28.27 | 21.5  | 20.68 | tr H0VHX8 H0VHX8_CAVPO | Uncharacterized protein (Fragment) OS=Cavia porcellus GN=DLG2 PE=4 SV=1   | CAVPO | 13 |
| 578 | 19.36 | 19.5 | 52.13 | 49.65 | 42.2  | tr H0VIE3 H0VIE3_CAVPO | Uncharacterized protein OS=Cavia porcellus GN=ESD PE=4 SV=1               | CAVPO | 12 |
| 579 | 19.3  | 19.3 | 45.3  | 45.3  | 45.3  | tr H0VX59 H0VX59_CAVPO | Uncharacterized protein OS=Cavia porcellus GN=ROM1 PE=4 SV=1              | CAVPO | 16 |
| 580 | 19.29 | 19.5 | 23.81 | 15.87 | 11.11 | tr H0VQH0 H0VQH0_CAVPO | Uncharacterized protein OS=Cavia porcellus GN=MYBBP1A PE=4 SV=1           | CAVPO | 10 |
| 581 | 19.28 | 19.4 | 47.33 | 47.33 | 34.33 | tr H0V6J2 H0V6J2_CAVPO | Uncharacterized protein OS=Cavia porcellus GN=TCEA1 PE=4 SV=1             | CAVPO | 11 |
| 582 | 19.26 | 19.4 | 35.12 | 30.77 | 21.4  | tr H0VT25 H0VT25_CAVPO | Uncharacterized protein (Fragment) OS=Cavia porcellus GN=Nop56 PE=4 SV=1  | CAVPO | 10 |
| 583 | 19.19 | 19.3 | 65.31 | 52.03 | 40.22 | tr H0VL43 H0VL43_CAVPO | Uncharacterized protein (Fragment) OS=Cavia porcellus GN=PITPNB PE=4 SV=1 | CAVPO | 11 |
| 584 | 19.18 | 19.5 | 60.54 | 60.15 | 53.26 | tr H0VEZ1 H0VEZ1_CAVPO | Uncharacterized protein OS=Cavia porcellus GN=HSD17B10 PE=3 SV=1          | CAVPO | 10 |
| 585 | 19.18 | 19.3 | 53.45 | 49.45 | 46.18 | tr H0VLY8 H0VLY8_CAVPO | Uncharacterized protein OS=Cavia porcellus GN=PROSC PE=1 SV=1             | CAVPO | 11 |
| 586 | 19.18 | 19.3 | 38.07 | 34.26 | 33.5  | tr H0VVN0 H0VVN0_CAVPO | Uncharacterized protein OS=Cavia porcellus GN=ACTR2 PE=3 SV=1             | CAVPO | 11 |
| 587 | 19.09 | 19.2 | 35.88 | 31.85 | 28.66 | tr H0UUE7 H0UUE7_CAVPO | Uncharacterized protein OS=Cavia porcellus GN=Eif2s3 PE=4 SV=1            | CAVPO | 10 |
| 588 | 19.09 | 19.3 | 69.49 | 56.99 | 51.1  | tr H0UUT5 H0UUT5_CAVPO | Uncharacterized protein (Fragment) OS=Cavia porcellus GN=Mtap PE=3 SV=1   | CAVPO | 10 |
| 589 | 19.09 | 19.2 | 58.97 | 55.31 | 55.31 | tr H0VJ50 H0VJ50_CAVPO | Uncharacterized protein OS=Cavia porcellus GN=C21orf33 PE=4 SV=1          | CAVPO | 12 |
| 590 | 19.08 | 19.2 | 45.85 | 34.97 | 32.9  | tr H0VDC6 H0VDC6_CAVPO | Uncharacterized protein (Fragment) OS=Cavia porcellus GN=HIBCH PE=4 SV=1  | CAVPO | 10 |

|     |       |      |       |       |       |                        |                                                                                   |       |    |
|-----|-------|------|-------|-------|-------|------------------------|-----------------------------------------------------------------------------------|-------|----|
| 591 | 19.04 | 19.3 | 24.55 | 19.55 | 17.61 | tr H0VKR9 H0VKR9_CAVPO | Uncharacterized protein OS=Cavia porcellus<br>GN=WDR44 PE=4 SV=1                  | CAVPO | 12 |
| 592 | 19    | 19.1 | 55.82 | 51    | 47.39 | tr H0UUQ6 H0UUQ6_CAVPO | Uncharacterized protein OS=Cavia porcellus<br>GN=PSME1 PE=4 SV=1                  | CAVPO | 11 |
| 593 | 18.98 | 19.1 | 29.92 | 26.06 | 26.06 | tr H0VEH8 H0VEH8_CAVPO | Uncharacterized protein (Fragment) OS=Cavia<br>porcellus GN=GSPT1 PE=4 SV=1       | CAVPO | 11 |
| 594 | 18.97 | 19.1 | 52.89 | 52.89 | 50.22 | tr H0VR64 H0VR64_CAVPO | Uncharacterized protein OS=Cavia porcellus<br>GN=EEF1B2 PE=3 SV=1                 | CAVPO | 13 |
| 595 | 18.95 | 19.1 | 31.09 | 24.18 | 20.56 | tr Q6WDN9 Q6WDN9_CAVPO | Preproalbumin OS=Cavia porcellus GN=Alb<br>PE=2 SV=1                              | CAVPO | 10 |
| 596 | 18.94 | 19   | 32.14 | 32.14 | 22.22 | tr H0W9N1 H0W9N1_CAVPO | Uncharacterized protein OS=Cavia porcellus<br>GN=PSMD5 PE=4 SV=1                  | CAVPO | 11 |
| 597 | 18.85 | 18.9 | 51.89 | 46.21 | 43.18 | tr H0VTN3 H0VTN3_CAVPO | 40S ribosomal protein S3a OS=Cavia porcellus<br>GN=RPS3A PE=3 SV=1                | CAVPO | 11 |
| 598 | 18.83 | 19   | 44.55 | 39    | 31.05 | tr H0VAG4 H0VAG4_CAVPO | Uncharacterized protein OS=Cavia porcellus<br>GN=HNRNPLL PE=4 SV=1                | CAVPO | 12 |
| 599 | 18.83 | 18.9 | 49.55 | 46.59 | 41.25 | tr H0VQU5 H0VQU5_CAVPO | Uncharacterized protein OS=Cavia porcellus<br>GN=DCPS PE=4 SV=1                   | CAVPO | 11 |
| 600 | 18.77 | 18.9 | 58.24 | 48.28 | 48.28 | tr H0W5S7 H0W5S7_CAVPO | Proteasome subunit alpha type (Fragment)<br>OS=Cavia porcellus GN=PSMA4 PE=3 SV=1 | CAVPO | 11 |
| 601 | 18.73 | 18.9 | 33.71 | 32.12 | 28.7  | tr H0VGN9 H0VGN9_CAVPO | Uncharacterized protein OS=Cavia porcellus<br>GN=OAT PE=3 SV=1                    | CAVPO | 10 |
| 602 | 18.7  | 18.8 | 40.39 | 36.72 | 31.1  | tr H0VQ97 H0VQ97_CAVPO | Uncharacterized protein OS=Cavia porcellus<br>GN=RMDN3 PE=4 SV=1                  | CAVPO | 9  |
| 603 | 18.68 | 18.7 | 29.7  | 27.79 | 27.79 | tr H0UY79 H0UY79_CAVPO | Uncharacterized protein OS=Cavia porcellus<br>GN=Stt13 PE=4 SV=1                  | CAVPO | 12 |
| 604 | 18.68 | 18.8 | 10.49 | 6.444 | 5.108 | tr H0VJM9 H0VJM9_CAVPO | Uncharacterized protein OS=Cavia porcellus<br>GN=MTOR PE=4 SV=1                   | CAVPO | 10 |

|     |       |      |       |       |       |                        |                                                                                             |       |    |
|-----|-------|------|-------|-------|-------|------------------------|---------------------------------------------------------------------------------------------|-------|----|
| 605 | 18.67 | 23.9 | 54.17 | 50.83 | 50.83 | tr H0UYE6 H0UYE6_CAVPO | Uncharacterized protein (Fragment) OS=Cavia porcellus GN=PRKAR2B PE=4 SV=1                  | CAVPO | 15 |
| 606 | 18.65 | 18.7 | 32.27 | 31.63 | 27.8  | tr H0UTM4 H0UTM4_CAVPO | Uncharacterized protein OS=Cavia porcellus GN=RALY PE=4 SV=1                                | CAVPO | 10 |
| 607 | 18.64 | 18.7 | 53.99 | 43.56 | 38.96 | tr H0VM56 H0VM56_CAVPO | Uncharacterized protein OS=Cavia porcellus GN=RPRD1B PE=4 SV=1                              | CAVPO | 12 |
| 608 | 18.62 | 18.7 | 21.79 | 16.09 | 14.08 | tr H0VD03 H0VD03_CAVPO | Uncharacterized protein (Fragment) OS=Cavia porcellus GN=DNAJC6 PE=4 SV=1                   | CAVPO | 11 |
| 609 | 18.58 | 18.8 | 32.81 | 29.66 | 25.17 | tr H0V7E3 H0V7E3_CAVPO | Eukaryotic translation initiation factor 3 subunit E OS=Cavia porcellus GN=EIF3E PE=3 SV=1  | CAVPO | 12 |
| 610 | 18.57 | 35.6 | 64.58 | 61.77 | 60.04 | tr H0W617 H0W617_CAVPO | Elongation factor 1-alpha OS=Cavia porcellus GN=EEF1A2 PE=3 SV=1                            | CAVPO | 22 |
| 611 | 18.56 | 18.6 | 34.77 | 27.9  | 26.13 | tr H0V559 H0V559_CAVPO | Dihydrolipoyl dehydrogenase OS=Cavia porcellus GN=DLD PE=3 SV=1                             | CAVPO | 10 |
| 612 | 18.56 | 30.5 | 71.19 | 67.51 | 65.82 | tr H0VJC9 H0VJC9_CAVPO | Uncharacterized protein OS=Cavia porcellus GN=GNAT2 PE=4 SV=1                               | CAVPO | 24 |
| 613 | 18.52 | 18.7 | 55.79 | 53.96 | 43.29 | tr H0VKD4 H0VKD4_CAVPO | Uncharacterized protein OS=Cavia porcellus GN=BUB3 PE=4 SV=1                                | CAVPO | 13 |
| 614 | 18.51 | 18.6 | 39.42 | 30.69 | 28.84 | tr B6V685 B6V685_CAVPO | Serpin B6 OS=Cavia porcellus PE=2 SV=1                                                      | CAVPO | 10 |
| 615 | 18.5  | 20.6 | 60.07 | 54.51 | 54.17 | tr H0UX52 H0UX52_CAVPO | Uncharacterized protein (Fragment) OS=Cavia porcellus GN=DDAH2 PE=4 SV=1                    | CAVPO | 11 |
| 616 | 18.5  | 20.7 | 41.87 | 37.19 | 37.19 | tr H0VC62 H0VC62_CAVPO | Uncharacterized protein OS=Cavia porcellus GN=ERP44 PE=4 SV=1                               | CAVPO | 11 |
| 617 | 18.47 | 18.5 | 44.04 | 39.9  | 33.16 | tr H0V0B4 H0V0B4_CAVPO | Branched-chain-amino-acid aminotransferase (Fragment) OS=Cavia porcellus GN=BCAT1 PE=1 SV=1 | CAVPO | 12 |

|     |       |      |       |       |       |                        |                                                                           |       |    |
|-----|-------|------|-------|-------|-------|------------------------|---------------------------------------------------------------------------|-------|----|
| 618 | 18.46 | 18.5 | 55.19 | 55.19 | 52.28 | tr H0VP94 H0VP94_CAVPO | Proteasome subunit alpha type OS=Cavia porcellus GN=PSMA5 PE=3 SV=1       | CAVPO | 14 |
| 619 | 18.42 | 18.7 | 61.57 | 50.46 | 46.3  | tr H0UTI8 H0UTI8_CAVPO | Peptidyl-prolyl cis-trans isomerase OS=Cavia porcellus GN=PPIB PE=3 SV=1  | CAVPO | 11 |
| 620 | 18.41 | 18.6 | 16.26 | 11.96 | 6.854 | tr H0V9V6 H0V9V6_CAVPO | Uncharacterized protein OS=Cavia porcellus GN=EIF4G1 PE=4 SV=1            | CAVPO | 9  |
| 621 | 18.4  | 18.5 | 40.79 | 34.66 | 34.66 | tr H0VJN8 H0VJN8_CAVPO | Uncharacterized protein OS=Cavia porcellus GN=Rps2 PE=3 SV=1              | CAVPO | 10 |
| 622 | 18.39 | 18.4 | 41.92 | 38.38 | 35.86 | tr H0VNY0 H0VNY0_CAVPO | Uncharacterized protein OS=Cavia porcellus GN=GNB5 PE=4 SV=1              | CAVPO | 11 |
| 623 | 18.35 | 18.4 | 34.81 | 27.81 | 25.23 | tr H0V8L1 H0V8L1_CAVPO | Uncharacterized protein (Fragment) OS=Cavia porcellus GN=Aarsd1 PE=4 SV=1 | CAVPO | 10 |
| 624 | 18.33 | 20.7 | 61.98 | 51.71 | 49.43 | tr H0W454 H0W454_CAVPO | Uncharacterized protein OS=Cavia porcellus GN=NAPB PE=4 SV=1              | CAVPO | 10 |
| 625 | 18.3  | 18.3 | 53.61 | 45.88 | 43.81 | tr H0W577 H0W577_CAVPO | Uncharacterized protein OS=Cavia porcellus GN=BSG PE=4 SV=1               | CAVPO | 25 |
| 626 | 18.27 | 20.1 | 17.4  | 8.342 | 4.274 | tr H0UTT9 H0UTT9_CAVPO | Uncharacterized protein OS=Cavia porcellus GN=RANBP2 PE=4 SV=1            | CAVPO | 11 |
| 627 | 18.27 | 18.3 | 53.58 | 45.28 | 45.28 | tr H0W701 H0W701_CAVPO | Uncharacterized protein (Fragment) OS=Cavia porcellus GN=PURA PE=4 SV=1   | CAVPO | 10 |
| 628 | 18.26 | 18.4 | 57.03 | 53.61 | 51.33 | tr H0VGC1 H0VGC1_CAVPO | Uncharacterized protein (Fragment) OS=Cavia porcellus GN=FBL PE=3 SV=1    | CAVPO | 11 |
| 629 | 18.25 | 18.4 | 32.22 | 24.56 | 20.24 | tr H0VE29 H0VE29_CAVPO | Uncharacterized protein OS=Cavia porcellus GN=HARS PE=3 SV=1              | CAVPO | 9  |
| 630 | 18.21 | 18.3 | 50.29 | 46.29 | 45.71 | tr H0UWB0 H0UWB0_CAVPO | Uncharacterized protein (Fragment) OS=Cavia porcellus GN=GYG1 PE=4 SV=1   | CAVPO | 17 |
| 631 | 18.2  | 18.3 | 52.25 | 41.38 | 31.83 | tr H0VGD3 H0VGD3_CAVPO | Uncharacterized protein OS=Cavia porcellus GN=Ndufa9 PE=4 SV=1            | CAVPO | 13 |

|     |       |      |       |       |       |                        |                                                                             |       |    |
|-----|-------|------|-------|-------|-------|------------------------|-----------------------------------------------------------------------------|-------|----|
| 632 | 18.15 | 20.3 | 71.14 | 71.14 | 70.65 | tr H0VS12 H0VS12_CAVPO | Uncharacterized protein OS=Cavia porcellus<br>GN=RAB1B PE=3 SV=1            | CAVPO | 14 |
| 633 | 18.1  | 18.2 | 42.64 | 39.02 | 32.04 | tr H0VH01 H0VH01_CAVPO | Uncharacterized protein (Fragment) OS=Cavia<br>porcellus GN=SEPT5 PE=3 SV=1 | CAVPO | 11 |
| 634 | 18.08 | 18.1 | 33.59 | 33.59 | 33.59 | tr H0VQ68 H0VQ68_CAVPO | Uncharacterized protein OS=Cavia porcellus<br>GN=ATP5F1 PE=4 SV=1           | CAVPO | 12 |
| 635 | 18.04 | 18.1 | 71.98 | 70.88 | 68.13 | tr H0VR44 H0VR44_CAVPO | Uncharacterized protein (Fragment) OS=Cavia<br>porcellus GN=ARL3 PE=3 SV=1  | CAVPO | 12 |
| 636 | 18.03 | 18.2 | 43.54 | 35.11 | 34.55 | tr H0WBZ0 H0WBZ0_CAVPO | Uncharacterized protein (Fragment) OS=Cavia<br>porcellus GN=SAE1 PE=4 SV=1  | CAVPO | 11 |
| 637 | 18.02 | 18.1 | 45.4  | 45.09 | 40.8  | tr H0V3Q0 H0V3Q0_CAVPO | Uncharacterized protein (Fragment) OS=Cavia<br>porcellus GN=RCN1 PE=4 SV=1  | CAVPO | 11 |
| 638 | 18    | 18   | 37.37 | 37.15 | 37.15 | tr H0UWJ4 H0UWJ4_CAVPO | Uncharacterized protein OS=Cavia porcellus<br>GN=U2AF2 PE=4 SV=1            | CAVPO | 9  |
| 639 | 18    | 20   | 53.51 | 53.51 | 53.51 | tr H0W678 H0W678_CAVPO | Uncharacterized protein (Fragment) OS=Cavia<br>porcellus GN=Rab3a PE=3 SV=1 | CAVPO | 14 |
| 640 | 17.98 | 18.1 | 60.15 | 53.51 | 43.54 | tr H0WBB9 H0WBB9_CAVPO | Uncharacterized protein OS=Cavia porcellus<br>GN=OTUB1 PE=4 SV=1            | CAVPO | 10 |
| 641 | 17.96 | 18.4 | 36.56 | 36.29 | 33.6  | tr H0VFN3 H0VFN3_CAVPO | Uncharacterized protein (Fragment) OS=Cavia<br>porcellus GN=CADM2 PE=4 SV=1 | CAVPO | 10 |
| 642 | 17.94 | 18   | 74.45 | 70.93 | 61.67 | tr H0VJK5 H0VJK5_CAVPO | Uncharacterized protein OS=Cavia porcellus<br>GN=PCMT1 PE=4 SV=1            | CAVPO | 9  |
| 643 | 17.93 | 18.9 | 33.79 | 31.03 | 25.19 | tr H0UT24 H0UT24_CAVPO | Uncharacterized protein OS=Cavia porcellus<br>GN=EEF1D PE=3 SV=1            | CAVPO | 11 |
| 644 | 17.92 | 18   | 75.56 | 75.56 | 75.56 | tr A9QUC5 A9QUC5_CAVPO | E-FABP OS=Cavia porcellus GN=FABP5 PE=2<br>SV=1                             | CAVPO | 10 |
| 645 | 17.92 | 18   | 52.66 | 52.66 | 52.66 | tr H0UY27 H0UY27_CAVPO | Uncharacterized protein OS=Cavia porcellus<br>GN=RAB18 PE=3 SV=1            | CAVPO | 10 |

|     |       |      |       |       |       |                        |                                                                             |       |    |
|-----|-------|------|-------|-------|-------|------------------------|-----------------------------------------------------------------------------|-------|----|
| 646 | 17.89 | 19.9 | 50.18 | 50.18 | 50.18 | tr H0VBZ7 H0VBZ7_CAVPO | Uncharacterized protein (Fragment) OS=Cavia porcellus PE=4 SV=1             | CAVPO | 10 |
| 647 | 17.89 | 18   | 29.72 | 25.16 | 22.8  | tr H0VNA7 H0VNA7_CAVPO | Uncharacterized protein OS=Cavia porcellus GN=RAD21 PE=4 SV=1               | CAVPO | 11 |
| 648 | 17.87 | 17.9 | 45.44 | 32.7  | 26.75 | tr H0W8J0 H0W8J0_CAVPO | Uncharacterized protein (Fragment) OS=Cavia porcellus GN=SELENBP1 PE=4 SV=1 | CAVPO | 10 |
| 649 | 17.86 | 17.9 | 13.23 | 10.08 | 10.08 | tr H0VC49 H0VC49_CAVPO | Uncharacterized protein OS=Cavia porcellus GN=IMPG2 PE=4 SV=1               | CAVPO | 13 |
| 650 | 17.85 | 18   | 49.89 | 37.31 | 26.05 | tr H0VEL8 H0VEL8_CAVPO | Uncharacterized protein OS=Cavia porcellus GN=NUCB1 PE=4 SV=1               | CAVPO | 8  |
| 651 | 17.8  | 17.9 | 37.7  | 33.23 | 30.35 | tr H0WB79 H0WB79_CAVPO | Uncharacterized protein OS=Cavia porcellus GN=HNRNPAB PE=4 SV=1             | CAVPO | 11 |
| 652 | 17.78 | 17.8 | 62.57 | 62.03 | 60.43 | tr H0UVU1 H0UVU1_CAVPO | Uncharacterized protein (Fragment) OS=Cavia porcellus GN=UCLH1 PE=4 SV=1    | CAVPO | 13 |
| 653 | 17.78 | 17.9 | 20.88 | 18.24 | 15.22 | tr H0VB03 H0VB03_CAVPO | Uncharacterized protein (Fragment) OS=Cavia porcellus GN=PROM1 PE=4 SV=1    | CAVPO | 9  |
| 654 | 17.76 | 17.8 | 49.14 | 46.55 | 41.81 | tr H0V816 H0V816_CAVPO | Uncharacterized protein OS=Cavia porcellus GN=FAM213A PE=4 SV=1             | CAVPO | 9  |
| 655 | 17.75 | 17.9 | 34.47 | 34.47 | 28.18 | tr H0V435 H0V435_CAVPO | Uncharacterized protein OS=Cavia porcellus GN=UBQLN1 PE=4 SV=1              | CAVPO | 12 |
| 656 | 17.72 | 17.8 | 34.61 | 31.5  | 28.64 | tr H0UVQ0 H0UVQ0_CAVPO | Uncharacterized protein OS=Cavia porcellus GN=PREB PE=4 SV=1                | CAVPO | 9  |
| 657 | 17.72 | 17.9 | 15.42 | 8.227 | 6.764 | tr H0VRW6 H0VRW6_CAVPO | DNA-directed RNA polymerase OS=Cavia porcellus GN=Polr2a PE=3 SV=1          | CAVPO | 9  |
| 658 | 17.65 | 17.8 | 38.95 | 35.08 | 32.04 | tr H0V5J3 H0V5J3_CAVPO | Uncharacterized protein (Fragment) OS=Cavia porcellus GN=PIP4K2B PE=4 SV=1  | CAVPO | 10 |
| 659 | 17.64 | 17.8 | 39.89 | 37.61 | 37.61 | tr H0VHZ4 H0VHZ4_CAVPO | Uncharacterized protein OS=Cavia porcellus GN=ATP6V0D1 PE=4 SV=1            | CAVPO | 10 |



|     |       |      |       |       |       |                        |                                                                                           |       |    |
|-----|-------|------|-------|-------|-------|------------------------|-------------------------------------------------------------------------------------------|-------|----|
| 660 | 17.63 | 17.7 | 56.37 | 56.37 | 52.87 | tr H0W2M4 H0W2M4_CAVPO | Uncharacterized protein OS=Cavia porcellus<br>GN=CRYM PE=4 SV=1                           | CAVPO | 20 |
| 661 | 17.63 | 17.8 | 65.36 | 65.36 | 65.36 | tr Q99NI2 Q99NI2_CAVPO | Nucleoside diphosphate kinase A OS=Cavia<br>porcellus GN=NDPK-A PE=2 SV=1                 | CAVPO | 12 |
| 662 | 17.61 | 17.7 | 21.11 | 18.69 | 17.12 | tr H0VWT8 H0VWT8_CAVPO | Uncharacterized protein (Fragment) OS=Cavia<br>porcellus GN=RAP1GAP PE=4 SV=1             | CAVPO | 10 |
| 663 | 17.6  | 17.7 | 58.21 | 58.21 | 40.06 | tr H0W3Y8 H0W3Y8_CAVPO | ATP-dependent (S)-NAD(P)H-hydrate<br>dehydratase OS=Cavia porcellus GN=CARKD<br>PE=3 SV=1 | CAVPO | 10 |
| 664 | 17.58 | 17.8 | 31.14 | 25.88 | 24.12 | tr H0V279 H0V279_CAVPO | Uncharacterized protein OS=Cavia porcellus<br>GN=PSMD12 PE=4 SV=1                         | CAVPO | 10 |
| 665 | 17.58 | 17.7 | 43.64 | 42.16 | 36.23 | tr H0V2R8 H0V2R8_CAVPO | Uncharacterized protein OS=Cavia porcellus<br>GN=Wars PE=3 SV=1                           | CAVPO | 12 |
| 666 | 17.57 | 17.7 | 42.14 | 40.13 | 38.13 | tr H0W149 H0W149_CAVPO | Uncharacterized protein OS=Cavia porcellus<br>GN=Rplp0 PE=3 SV=1                          | CAVPO | 10 |
| 667 | 17.55 | 19.2 | 34.59 | 31.76 | 28.71 | tr H0VHL2 H0VHL2_CAVPO | Uncharacterized protein (Fragment) OS=Cavia<br>porcellus GN=PAICS PE=4 SV=1               | CAVPO | 11 |
| 668 | 17.55 | 17.9 | 38.77 | 38.53 | 32.39 | tr H0VHT6 H0VHT6_CAVPO | Mannose-6-phosphate isomerase (Fragment)<br>OS=Cavia porcellus GN=MPI PE=3 SV=1           | CAVPO | 11 |
| 669 | 17.53 | 17.6 | 50.89 | 50.89 | 47.32 | tr H0VA50 H0VA50_CAVPO | Uncharacterized protein (Fragment) OS=Cavia<br>porcellus GN=RS1 PE=4 SV=1                 | CAVPO | 12 |
| 670 | 17.48 | 17.7 | 45.53 | 43.58 | 31.56 | tr H0V190 H0V190_CAVPO | Uncharacterized protein (Fragment) OS=Cavia<br>porcellus GN=PPME1 PE=4 SV=1               | CAVPO | 9  |
| 671 | 17.48 | 17.6 | 21.26 | 19.2  | 19.2  | tr H0VUV9 H0VUV9_CAVPO | Uncharacterized protein OS=Cavia porcellus<br>GN=NCDN PE=4 SV=1                           | CAVPO | 12 |
| 672 | 17.44 | 17.6 | 22.88 | 18.59 | 17.34 | tr H0V1I4 H0V1I4_CAVPO | Uncharacterized protein OS=Cavia porcellus<br>GN=BBS2 PE=4 SV=1                           | CAVPO | 10 |
| 673 | 17.41 | 17.5 | 46.46 | 44.31 | 41.54 | tr H0V853 H0V853_CAVPO | Uncharacterized protein (Fragment) OS=Cavia                                               | CAVPO | 11 |

|     |       |      |       |       |       |                        |                                                                                               |       |    |
|-----|-------|------|-------|-------|-------|------------------------|-----------------------------------------------------------------------------------------------|-------|----|
|     |       |      |       |       |       |                        | porcellus GN=AKR7A3 PE=4 SV=1                                                                 |       |    |
| 674 | 17.39 | 26.5 | 58.71 | 57.64 | 51.47 | tr H0UV47 H0UV47_CAVPO | Uncharacterized protein (Fragment) OS=Cavia porcellus GN=PCBP2 PE=4 SV=1                      | CAVPO | 17 |
| 675 | 17.37 | 17.5 | 62.62 | 62.62 | 50.97 | tr H0UW23 H0UW23_CAVPO | Uncharacterized protein (Fragment) OS=Cavia porcellus GN=LIN7A PE=4 SV=1                      | CAVPO | 10 |
| 676 | 17.37 | 17.5 | 47.15 | 44.11 | 34.98 | tr H0W953 H0W953_CAVPO | 40S ribosomal protein S4 OS=Cavia porcellus GN=RPS4X PE=3 SV=1                                | CAVPO | 9  |
| 677 | 17.35 | 17.6 | 76    | 62.4  | 62.4  | tr H0VUU3 H0VUU3_CAVPO | Histone H2B (Fragment) OS=Cavia porcellus GN=HIST1H2BM PE=3 SV=1                              | CAVPO | 37 |
| 678 | 17.3  | 18.7 | 40.87 | 40.56 | 37.77 | tr H0V629 H0V629_CAVPO | Serine/threonine-protein phosphatase OS=Cavia porcellus GN=PPP1CC PE=3 SV=1                   | CAVPO | 10 |
| 679 | 17.28 | 17.4 | 43.17 | 43.17 | 40.06 | tr H0VR31 H0VR31_CAVPO | Probable tRNA N6-adenosine threonylcarbamoyltransferase OS=Cavia porcellus GN=OSGEP PE=3 SV=1 | CAVPO | 9  |
| 680 | 17.27 | 21.6 | 44.63 | 34.11 | 32    | tr H0V9M9 H0V9M9_CAVPO | Uncharacterized protein (Fragment) OS=Cavia porcellus GN=SEPT8 PE=3 SV=1                      | CAVPO | 12 |
| 681 | 17.27 | 17.8 | 18.77 | 12.89 | 8.711 | tr H0VR73 H0VR73_CAVPO | Uncharacterized protein (Fragment) OS=Cavia porcellus GN=EEA1 PE=4 SV=1                       | CAVPO | 11 |
| 682 | 17.26 | 17.4 | 43.09 | 36.97 | 36.7  | tr H0V556 H0V556_CAVPO | Uncharacterized protein OS=Cavia porcellus GN=DEK PE=4 SV=1                                   | CAVPO | 11 |
| 683 | 17.23 | 19.5 | 57.78 | 57.78 | 57.78 | tr H0V2K4 H0V2K4_CAVPO | Uncharacterized protein OS=Cavia porcellus GN=PRDX4 PE=4 SV=1                                 | CAVPO | 13 |
| 684 | 17.21 | 17.4 | 48.5  | 40.53 | 40.53 | tr H0VYZ5 H0VYZ5_CAVPO | Uncharacterized protein OS=Cavia porcellus GN=CYB5R3 PE=3 SV=1                                | CAVPO | 11 |
| 685 | 17.2  | 17.3 | 34.22 | 31.31 | 25    | tr H0W6Z1 H0W6Z1_CAVPO | Uncharacterized protein OS=Cavia porcellus GN=KIAA0513 PE=4 SV=1                              | CAVPO | 10 |
| 686 | 17.19 | 17.3 | 16.01 | 13.11 | 12.99 | tr H0UXZ0 H0UXZ0_CAVPO | Uncharacterized protein OS=Cavia porcellus GN=PIP5K1A PE=4 SV=1                               | CAVPO | 12 |

|     |       |      |       |       |       |                        |                                                                                 |       |    |
|-----|-------|------|-------|-------|-------|------------------------|---------------------------------------------------------------------------------|-------|----|
| 687 | 17.19 | 17.4 | 24.79 | 16.48 | 15.37 | tr H0VQ21 H0VQ21_CAVPO | Uncharacterized protein (Fragment) OS=Cavia porcellus GN=TARS PE=3 SV=1         | CAVPO | 11 |
| 688 | 17.13 | 17.4 | 37.67 | 35    | 33.33 | tr H0UXT3 H0UXT3_CAVPO | Uncharacterized protein OS=Cavia porcellus GN=ARPC2 PE=4 SV=1                   | CAVPO | 11 |
| 689 | 17.13 | 17.3 | 50    | 42.01 | 42.01 | tr H0V811 H0V811_CAVPO | Uncharacterized protein OS=Cavia porcellus GN=AHSA1 PE=4 SV=1                   | CAVPO | 11 |
| 690 | 17.12 | 17.2 | 66.89 | 58.28 | 58.28 | tr H0VS22 H0VS22_CAVPO | Uncharacterized protein (Fragment) OS=Cavia porcellus GN=MYL6 PE=4 SV=1         | CAVPO | 9  |
| 691 | 17.11 | 17.6 | 17.53 | 10.82 | 8.247 | tr H0VAH4 H0VAH4_CAVPO | Uncharacterized protein OS=Cavia porcellus GN=TNR PE=4 SV=1                     | CAVPO | 9  |
| 692 | 17.1  | 17.5 | 11.14 | 7.625 | 3.092 | tr H0VEU6 H0VEU6_CAVPO | Uncharacterized protein (Fragment) OS=Cavia porcellus GN=DMXL2 PE=4 SV=1        | CAVPO | 7  |
| 693 | 17.1  | 17.5 | 21.62 | 13.41 | 8.333 | tr H0VQ01 H0VQ01_CAVPO | Uncharacterized protein (Fragment) OS=Cavia porcellus GN=IQGAP1 PE=4 SV=1       | CAVPO | 9  |
| 694 | 17.08 | 17.1 | 60.69 | 60.69 | 60.69 | tr H0VQN1 H0VQN1_CAVPO | Uncharacterized protein (Fragment) OS=Cavia porcellus GN=RAB2A PE=3 SV=1        | CAVPO | 13 |
| 695 | 17.05 | 17.1 | 56.34 | 56.34 | 56.34 | tr H0UUI9 H0UUI9_CAVPO | Uncharacterized protein OS=Cavia porcellus GN=Atp5o PE=3 SV=1                   | CAVPO | 13 |
| 696 | 17.04 | 27   | 54.2  | 37.83 | 33.41 | tr H0UUU6 H0UUU6_CAVPO | Uncharacterized protein (Fragment) OS=Cavia porcellus GN=DNM3 PE=3 SV=1         | CAVPO | 14 |
| 697 | 17.03 | 17.1 | 59.92 | 50.61 | 42.91 | tr H0VQE7 H0VQE7_CAVPO | Uncharacterized protein OS=Cavia porcellus GN=PSMA7 PE=4 SV=1                   | CAVPO | 9  |
| 698 | 17.03 | 17.3 | 34.49 | 30.59 | 22.78 | tr H0W752 H0W752_CAVPO | Uncharacterized protein (Fragment) OS=Cavia porcellus GN=LOC100720949 PE=3 SV=1 | CAVPO | 9  |
| 699 | 17.02 | 17.2 | 58.76 | 55.47 | 45.99 | tr H0UT25 H0UT25_CAVPO | Uncharacterized protein OS=Cavia porcellus GN=PYCRL PE=4 SV=1                   | CAVPO | 10 |
| 700 | 16.96 | 18.5 | 49.62 | 41.31 | 41.31 | tr H0UU01 H0UU01_CAVPO | Uncharacterized protein OS=Cavia porcellus GN=DNAJA1 PE=3 SV=1                  | CAVPO | 13 |

|     |       |      |       |       |       |                        |                                                                                                  |       |    |
|-----|-------|------|-------|-------|-------|------------------------|--------------------------------------------------------------------------------------------------|-------|----|
| 701 | 16.93 | 17.1 | 35.56 | 26.46 | 26.46 | tr H0UV40 H0UV40_CAVPO | Ubiquitin carboxyl-terminal hydrolase<br>(Fragment) OS=Cavia porcellus GN=USP14<br>PE=3 SV=1     | CAVPO | 11 |
| 702 | 16.91 | 17   | 73.77 | 65.57 | 58.47 | tr H0V7C2 H0V7C2_CAVPO | Uncharacterized protein OS=Cavia porcellus<br>GN=ARF5 PE=3 SV=1                                  | CAVPO | 11 |
| 703 | 16.88 | 17.1 | 49.39 | 41.77 | 38.11 | tr H0VGU4 H0VGU4_CAVPO | Uncharacterized protein OS=Cavia porcellus<br>GN=NUDC PE=4 SV=1                                  | CAVPO | 13 |
| 704 | 16.85 | 17   | 41.01 | 33.6  | 28.31 | tr H0V834 H0V834_CAVPO | Uncharacterized protein (Fragment) OS=Cavia<br>porcellus GN=ACAD8 PE=3 SV=1                      | CAVPO | 9  |
| 705 | 16.83 | 17   | 24.04 | 16.98 | 10.36 | tr H0VDQ2 H0VDQ2_CAVPO | Uncharacterized protein (Fragment) OS=Cavia<br>porcellus GN=EIF4G2 PE=4 SV=1                     | CAVPO | 8  |
| 706 | 16.83 | 17.3 | 16.85 | 13.75 | 10.55 | tr H0VMS1 H0VMS1_CAVPO | Uncharacterized protein OS=Cavia porcellus<br>GN=CP PE=4 SV=1                                    | CAVPO | 8  |
| 707 | 16.82 | 16.9 | 50.57 | 44.53 | 39.25 | tr H0VQ50 H0VQ50_CAVPO | Proteasome subunit beta type (Fragment)<br>OS=Cavia porcellus GN=PSMB5 PE=3 SV=1                 | CAVPO | 9  |
| 708 | 16.79 | 16.9 | 62.5  | 62.5  | 62.5  | tr H0W7U7 H0W7U7_CAVPO | Uncharacterized protein OS=Cavia porcellus<br>GN=HSPB1 PE=3 SV=1                                 | CAVPO | 12 |
| 709 | 16.78 | 17.2 | 21.47 | 17.85 | 10.95 | tr H0VAC1 H0VAC1_CAVPO | Eukaryotic translation initiation factor 3<br>subunit C OS=Cavia porcellus GN=Eif3c PE=3<br>SV=1 | CAVPO | 8  |
| 710 | 16.74 | 16.8 | 45.88 | 45.1  | 45.1  | tr H0V721 H0V721_CAVPO | Proteasome subunit alpha type OS=Cavia<br>porcellus GN=PSMA3 PE=3 SV=1                           | CAVPO | 11 |
| 711 | 16.72 | 19.1 | 31.7  | 21.24 | 16.56 | tr H0VBJ0 H0VBJ0_CAVPO | Uncharacterized protein OS=Cavia porcellus<br>GN=BCLAF1 PE=4 SV=1                                | CAVPO | 12 |
| 712 | 16.71 | 16.9 | 37.5  | 32.89 | 27.19 | tr H0UU39 H0UU39_CAVPO | Uncharacterized protein OS=Cavia porcellus<br>GN=FKBP5 PE=4 SV=1                                 | CAVPO | 9  |
| 713 | 16.7  | 16.8 | 40.07 | 26.78 | 25.28 | tr H0W6B9 H0W6B9_CAVPO | Uncharacterized protein OS=Cavia porcellus<br>GN=TULP1 PE=4 SV=1                                 | CAVPO | 11 |

|     |       |      |       |       |       |                        |                                                                                              |       |    |
|-----|-------|------|-------|-------|-------|------------------------|----------------------------------------------------------------------------------------------|-------|----|
| 714 | 16.67 | 18   | 36.69 | 30.8  | 23    | tr H0VCS0 H0VCS0_CAVPO | Uncharacterized protein OS=Cavia porcellus<br>GN=SLC32A1 PE=4 SV=1                           | CAVPO | 10 |
| 715 | 16.65 | 17.8 | 18.15 | 13.87 | 11.78 | tr H0VLZ0 H0VLZ0_CAVPO | Signal transducer and activator of<br>transcription OS=Cavia porcellus GN=STAT1<br>PE=3 SV=1 | CAVPO | 12 |
| 716 | 16.64 | 23.7 | 48.56 | 46.26 | 42.24 | tr H0W3C3 H0W3C3_CAVPO | Uncharacterized protein (Fragment) OS=Cavia<br>porcellus GN=CTBP1 PE=3 SV=1                  | CAVPO | 14 |
| 717 | 16.63 | 16.8 | 14.64 | 12.16 | 7.522 | tr H0VBV1 H0VBV1_CAVPO | Uncharacterized protein OS=Cavia porcellus<br>GN=WDR7 PE=4 SV=1                              | CAVPO | 8  |
| 718 | 16.62 | 16.7 | 43.79 | 38.64 | 33.96 | tr H0VSG3 H0VSG3_CAVPO | Uncharacterized protein OS=Cavia porcellus<br>GN=ACAT1 PE=3 SV=1                             | CAVPO | 9  |
| 719 | 16.6  | 16.8 | 38.73 | 35.95 | 33.67 | tr H0UWF4 H0UWF4_CAVPO | S-adenosylmethionine synthase OS=Cavia<br>porcellus GN=MAT2A PE=3 SV=1                       | CAVPO | 9  |
| 720 | 16.6  | 16.7 | 49.12 | 40.71 | 40.71 | tr H0VWF1 H0VWF1_CAVPO | Uncharacterized protein OS=Cavia porcellus<br>GN=ATP6V1E1 PE=3 SV=1                          | CAVPO | 12 |
| 721 | 16.58 | 16.8 | 24.59 | 18.33 | 18.33 | tr H0UTF8 H0UTF8_CAVPO | Signal recognition particle subunit SRP72<br>OS=Cavia porcellus GN=SRP72 PE=3 SV=1           | CAVPO | 10 |
| 722 | 16.58 | 17.3 | 27.43 | 16.51 | 9.049 | tr H0UZY0 H0UZY0_CAVPO | Uncharacterized protein (Fragment) OS=Cavia<br>porcellus GN=TCERG1 PE=4 SV=1                 | CAVPO | 9  |
| 723 | 16.56 | 16.9 | 29.69 | 28.21 | 21.12 | tr H0V790 H0V790_CAVPO | NADPH--cytochrome P450 reductase<br>OS=Cavia porcellus GN=Por PE=3 SV=1                      | CAVPO | 10 |
| 724 | 16.54 | 16.7 | 25.23 | 20.63 | 17.5  | tr H0VNU3 H0VNU3_CAVPO | Uncharacterized protein OS=Cavia porcellus<br>PE=3 SV=1                                      | CAVPO | 9  |
| 725 | 16.47 | 16.7 | 30.79 | 23.34 | 18.96 | tr H0VS40 H0VS40_CAVPO | Uncharacterized protein (Fragment) OS=Cavia<br>porcellus GN=PRKCA PE=4 SV=1                  | CAVPO | 8  |
| 726 | 16.45 | 22.5 | 48.34 | 47.87 | 45.02 | tr H0V150 H0V150_CAVPO | Uncharacterized protein OS=Cavia porcellus<br>GN=HMGB2 PE=4 SV=1                             | CAVPO | 21 |
| 727 | 16.41 | 20.8 | 30.98 | 26.53 | 22.45 | tr H0W9H4 H0W9H4_CAVPO | Uncharacterized protein (Fragment) OS=Cavia                                                  | CAVPO | 11 |

|     |       |      |       |       |       |                        |                                                                                    |       |     |
|-----|-------|------|-------|-------|-------|------------------------|------------------------------------------------------------------------------------|-------|-----|
|     |       |      |       |       |       |                        | porcellus GN=BIN1 PE=4 SV=1                                                        |       |     |
| 728 | 16.39 | 16.5 | 45.74 | 41.13 | 37.59 | tr H0V183 H0V183_CAVPO | Uncharacterized protein OS=Cavia porcellus<br>GN=PSMD13 PE=4 SV=1                  | CAVPO | 9   |
| 729 | 16.39 | 16.4 | 50.88 | 41.81 | 34.5  | tr H0VL96 H0VL96_CAVPO | Uncharacterized protein (Fragment) OS=Cavia<br>porcellus GN=MSI1 PE=4 SV=1         | CAVPO | 9   |
| 730 | 16.37 | 83.4 | 83.15 | 80.45 | 80.22 | tr H0VMG5 H0VMG5_CAVPO | Uncharacterized protein OS=Cavia porcellus<br>GN=TUBB2B PE=3 SV=1                  | CAVPO | 132 |
| 731 | 16.34 | 22.6 | 76.61 | 69.27 | 56.88 | tr H0VQH5 H0VQH5_CAVPO | Uncharacterized protein OS=Cavia porcellus<br>GN=GSTM2 PE=3 SV=1                   | CAVPO | 16  |
| 732 | 16.33 | 16.4 | 57.89 | 57.89 | 53.29 | tr H0VCN8 H0VCN8_CAVPO | Uncharacterized protein (Fragment) OS=Cavia<br>porcellus GN=LOC100727315 PE=3 SV=1 | CAVPO | 10  |
| 733 | 16.31 | 16.6 | 28.19 | 28.19 | 19.24 | tr H0V329 H0V329_CAVPO | Uncharacterized protein (Fragment) OS=Cavia<br>porcellus GN=RANGAP1 PE=4 SV=1      | CAVPO | 10  |
| 734 | 16.27 | 16.4 | 48.84 | 46.84 | 43.85 | tr H0VPV4 H0VPV4_CAVPO | Uncharacterized protein OS=Cavia porcellus<br>GN=CAPZB PE=4 SV=1                   | CAVPO | 15  |
| 735 | 16.22 | 16.4 | 45.77 | 44.28 | 38.81 | tr H0UWR3 H0UWR3_CAVPO | Uncharacterized protein (Fragment) OS=Cavia<br>porcellus GN=ACAT2 PE=3 SV=1        | CAVPO | 10  |
| 736 | 16.21 | 16.2 | 48.6  | 48.6  | 45.79 | tr H0VTZ4 H0VTZ4_CAVPO | Uncharacterized protein (Fragment) OS=Cavia<br>porcellus GN=SEC13 PE=4 SV=1        | CAVPO | 10  |
| 737 | 16.2  | 16.4 | 29.37 | 18.03 | 14.34 | tr H0VJ48 H0VJ48_CAVPO | Uncharacterized protein OS=Cavia porcellus<br>GN=APEH PE=4 SV=1                    | CAVPO | 10  |
| 738 | 16.19 | 16.2 | 37.92 | 34.83 | 31.74 | tr H0VKJ1 H0VKJ1_CAVPO | Uncharacterized protein OS=Cavia porcellus<br>GN=STOML2 PE=4 SV=1                  | CAVPO | 9   |
| 739 | 16.19 | 16.2 | 20.85 | 17.49 | 16.62 | tr H0WC86 H0WC86_CAVPO | Uncharacterized protein OS=Cavia porcellus<br>GN=CNGA1 PE=4 SV=1                   | CAVPO | 9   |
| 740 | 16.17 | 16.5 | 60.22 | 59.68 | 56.99 | tr H0W6D7 H0W6D7_CAVPO | Uncharacterized protein OS=Cavia porcellus<br>GN=ARL8B PE=3 SV=1                   | CAVPO | 10  |

|     |       |      |       |       |       |                        |                                                                              |       |    |
|-----|-------|------|-------|-------|-------|------------------------|------------------------------------------------------------------------------|-------|----|
| 741 | 16.15 | 16.3 | 39.11 | 29.38 | 20.82 | tr H0VTZ8 H0VTZ8_CAVPO | Uncharacterized protein OS=Cavia porcellus<br>GN=SARS PE=3 SV=1              | CAVPO | 8  |
| 742 | 16.14 | 16.3 | 51.96 | 40.22 | 31.56 | tr H0UUR5 H0UUR5_CAVPO | Uncharacterized protein OS=Cavia porcellus<br>GN=SLC9A3R1 PE=4 SV=1          | CAVPO | 8  |
| 743 | 16.13 | 16.2 | 41.41 | 34.8  | 33.48 | tr H0VEC4 H0VEC4_CAVPO | Uncharacterized protein OS=Cavia porcellus<br>GN=DLST PE=3 SV=1              | CAVPO | 10 |
| 744 | 16.13 | 16.2 | 75.32 | 67.53 | 63.64 | tr H0VFM6 H0VFM6_CAVPO | Uncharacterized protein OS=Cavia porcellus<br>GN=EIF5AL1 PE=4 SV=1           | CAVPO | 9  |
| 745 | 16.11 | 16.1 | 49.52 | 49.05 | 49.05 | tr H0VRR4 H0VRR4_CAVPO | Uncharacterized protein (Fragment) OS=Cavia<br>porcellus GN=CMPK1 PE=3 SV=1  | CAVPO | 9  |
| 746 | 16.08 | 16.1 | 64.4  | 53.4  | 53.4  | tr H0WBZ2 H0WBZ2_CAVPO | Uncharacterized protein OS=Cavia porcellus<br>GN=Cdc42 PE=3 SV=1             | CAVPO | 10 |
| 747 | 15.98 | 16.2 | 26.67 | 15.77 | 11.15 | tr H0VJ64 H0VJ64_CAVPO | Uncharacterized protein OS=Cavia porcellus<br>GN=CUL5 PE=3 SV=1              | CAVPO | 9  |
| 748 | 15.92 | 16.1 | 15.49 | 11.38 | 6.886 | tr H0V0I8 H0V0I8_CAVPO | Uncharacterized protein OS=Cavia porcellus<br>GN=PFAS PE=4 SV=1              | CAVPO | 7  |
| 749 | 15.91 | 16   | 55.36 | 47.06 | 40.48 | tr H0VF98 H0VF98_CAVPO | Uncharacterized protein OS=Cavia porcellus<br>GN=TXNL1 PE=4 SV=1             | CAVPO | 8  |
| 750 | 15.91 | 16   | 24.7  | 24.7  | 24.7  | tr H0VJL3 H0VJL3_CAVPO | Uncharacterized protein OS=Cavia porcellus<br>GN=TARDBP PE=4 SV=1            | CAVPO | 8  |
| 751 | 15.9  | 16   | 54.83 | 48.97 | 45.86 | tr H0VCV4 H0VCV4_CAVPO | Uncharacterized protein (Fragment) OS=Cavia<br>porcellus GN=NTM PE=4 SV=1    | CAVPO | 9  |
| 752 | 15.87 | 16   | 37.33 | 26.43 | 26.43 | tr H0V0Q6 H0V0Q6_CAVPO | Uncharacterized protein OS=Cavia porcellus<br>GN=Sugt1 PE=4 SV=1             | CAVPO | 8  |
| 753 | 15.87 | 16   | 43.15 | 37.5  | 37.5  | tr H0VPC7 H0VPC7_CAVPO | Uncharacterized protein OS=Cavia porcellus<br>GN=ALYREF PE=4 SV=1            | CAVPO | 8  |
| 754 | 15.85 | 16   | 51.41 | 51.41 | 41.37 | tr H0VCG2 H0VCG2_CAVPO | Uncharacterized protein (Fragment) OS=Cavia<br>porcellus GN=NDUFV2 PE=4 SV=1 | CAVPO | 10 |

|     |       |      |       |       |       |                        |                                                                          |       |    |
|-----|-------|------|-------|-------|-------|------------------------|--------------------------------------------------------------------------|-------|----|
| 755 | 15.84 | 15.9 | 47.35 | 44.88 | 44.88 | tr H0VNA2 H0VNA2_CAVPO | Uncharacterized protein (Fragment) OS=Cavia porcellus GN=CYC1 PE=4 SV=1  | CAVPO | 10 |
| 756 | 15.82 | 16   | 29.4  | 26.08 | 18.94 | tr H0VI33 H0VI33_CAVPO | Uncharacterized protein OS=Cavia porcellus GN=PPP2R5D PE=4 SV=1          | CAVPO | 9  |
| 757 | 15.81 | 15.9 | 20.58 | 16.25 | 14.8  | tr H0UWZ5 H0UWZ5_CAVPO | Uncharacterized protein (Fragment) OS=Cavia porcellus GN=Psap PE=4 SV=1  | CAVPO | 10 |
| 758 | 15.77 | 16   | 47.16 | 42.79 | 28.38 | tr H0V3S4 H0V3S4_CAVPO | Uncharacterized protein OS=Cavia porcellus GN=AAK1 PE=4 SV=1             | CAVPO | 8  |
| 759 | 15.73 | 15.8 | 70.56 | 66.67 | 66.67 | tr H0VG07 H0VG07_CAVPO | Uncharacterized protein (Fragment) OS=Cavia porcellus GN=GLO1 PE=4 SV=1  | CAVPO | 16 |
| 760 | 15.66 | 15.9 | 18.5  | 16.84 | 10.38 | tr H0VAD0 H0VAD0_CAVPO | Uncharacterized protein (Fragment) OS=Cavia porcellus GN=GARS PE=3 SV=1  | CAVPO | 7  |
| 761 | 15.64 | 15.8 | 32.29 | 24.34 | 21.93 | tr H0V9P2 H0V9P2_CAVPO | Uncharacterized protein OS=Cavia porcellus GN=SRSF4 PE=4 SV=1            | CAVPO | 10 |
| 762 | 15.62 | 15.8 | 50.38 | 50.13 | 38.93 | tr H0V8U6 H0V8U6_CAVPO | Uncharacterized protein OS=Cavia porcellus GN=LOC100727448 PE=3 SV=1     | CAVPO | 8  |
| 763 | 15.57 | 15.6 | 37.24 | 37.24 | 31.51 | tr H0UUI2 H0UUI2_CAVPO | Uncharacterized protein OS=Cavia porcellus GN=Map4 PE=4 SV=1             | CAVPO | 9  |
| 764 | 15.53 | 18   | 73.87 | 61.81 | 57.79 | tr H0W316 H0W316_CAVPO | Uncharacterized protein (Fragment) OS=Cavia porcellus GN=PRDX2 PE=4 SV=1 | CAVPO | 17 |
| 765 | 15.5  | 15.6 | 53.73 | 53.73 | 41.42 | tr H0W6T7 H0W6T7_CAVPO | Uncharacterized protein OS=Cavia porcellus GN=Mapre1 PE=4 SV=1           | CAVPO | 8  |
| 766 | 15.49 | 15.5 | 40.48 | 38.44 | 38.44 | tr H0VIS2 H0VIS2_CAVPO | Uncharacterized protein OS=Cavia porcellus GN=SDR39U1 PE=4 SV=1          | CAVPO | 10 |
| 767 | 15.48 | 15.7 | 27.11 | 17.09 | 11.84 | tr H0VCD3 H0VCD3_CAVPO | Uncharacterized protein OS=Cavia porcellus GN=NUP93 PE=4 SV=1            | CAVPO | 8  |
| 768 | 15.44 | 15.7 | 20.72 | 13.92 | 10.41 | tr H0VAB1 H0VAB1_CAVPO | Uncharacterized protein OS=Cavia porcellus GN=PRPF6 PE=4 SV=1            | CAVPO | 9  |



|     |       |      |       |       |       |                        |                                                                                 |       |    |
|-----|-------|------|-------|-------|-------|------------------------|---------------------------------------------------------------------------------|-------|----|
| 769 | 15.44 | 15.5 | 38.3  | 27.75 | 24.77 | tr H0VCC9 H0VCC9_CAVPO | Uncharacterized protein OS=Cavia porcellus<br>GN=PDK1 PE=4 SV=1                 | CAVPO | 9  |
| 770 | 15.42 | 15.4 | 35.29 | 34.9  | 34.9  | tr H0V664 H0V664_CAVPO | Uncharacterized protein OS=Cavia porcellus<br>GN=SNRPA1 PE=4 SV=1               | CAVPO | 8  |
| 771 | 15.42 | 15.5 | 17.67 | 14.59 | 14.59 | tr H0VBF0 H0VBF0_CAVPO | Uncharacterized protein OS=Cavia porcellus<br>GN=SV2B PE=4 SV=1                 | CAVPO | 11 |
| 772 | 15.42 | 15.6 | 51.82 | 51.21 | 34.85 | tr H0VYI8 H0VYI8_CAVPO | Uncharacterized protein OS=Cavia porcellus<br>GN=AIP PE=4 SV=1                  | CAVPO | 10 |
| 773 | 15.41 | 15.4 | 49.04 | 45.19 | 45.19 | tr H0W399 H0W399_CAVPO | Uncharacterized protein OS=Cavia porcellus<br>GN=THEM6 PE=4 SV=1                | CAVPO | 9  |
| 774 | 15.38 | 15.5 | 21.36 | 14.29 | 12.82 | tr H0VLR0 H0VLR0_CAVPO | Uncharacterized protein (Fragment) OS=Cavia<br>porcellus GN=NCBP1 PE=4 SV=1     | CAVPO | 9  |
| 775 | 15.37 | 15.4 | 39.49 | 33.12 | 30.89 | tr H0UUD1 H0UUD1_CAVPO | Uncharacterized protein OS=Cavia porcellus<br>GN=SGTA PE=4 SV=1                 | CAVPO | 8  |
| 776 | 15.35 | 25.5 | 40.75 | 39.25 | 29.17 | tr H0W1F5 H0W1F5_CAVPO | Uncharacterized protein OS=Cavia porcellus<br>GN=CAMK2B PE=4 SV=1               | CAVPO | 16 |
| 777 | 15.32 | 15.8 | 46.65 | 40.5  | 36.31 | tr H0V391 H0V391_CAVPO | Uncharacterized protein OS=Cavia porcellus<br>GN=SNRNP40 PE=4 SV=1              | CAVPO | 10 |
| 778 | 15.32 | 15.4 | 41.73 | 29.86 | 29.86 | tr H0VH31 H0VH31_CAVPO | ATP synthase subunit gamma (Fragment)<br>OS=Cavia porcellus GN=ATP5C1 PE=3 SV=1 | CAVPO | 8  |
| 779 | 15.3  | 15.5 | 49.13 | 44.19 | 41.57 | tr H0V804 H0V804_CAVPO | Aldose 1-epimerase OS=Cavia porcellus<br>GN=GALM PE=3 SV=1                      | CAVPO | 13 |
| 780 | 15.3  | 15.4 | 36.46 | 36.46 | 36.46 | tr H0VHX0 H0VHX0_CAVPO | Uncharacterized protein (Fragment) OS=Cavia<br>porcellus GN=SNRPA PE=4 SV=1     | CAVPO | 10 |
| 781 | 15.29 | 15.4 | 29.63 | 29.63 | 27.51 | tr H0VAE5 H0VAE5_CAVPO | Uncharacterized protein OS=Cavia porcellus<br>GN=CDC37 PE=4 SV=1                | CAVPO | 9  |
| 782 | 15.28 | 15.3 | 47.83 | 42.61 | 42.17 | tr H0VLZ7 H0VLZ7_CAVPO | Uncharacterized protein (Fragment) OS=Cavia<br>porcellus GN=CACYBP PE=4 SV=1    | CAVPO | 8  |

|     |       |      |       |       |       |                        |                                                                            |       |    |
|-----|-------|------|-------|-------|-------|------------------------|----------------------------------------------------------------------------|-------|----|
| 783 | 15.26 | 15.4 | 38.12 | 34.9  | 23.02 | tr H0VDK5 H0VDK5_CAVPO | Uncharacterized protein (Fragment) OS=Cavia porcellus GN=Nr2e3 PE=3 SV=1   | CAVPO | 8  |
| 784 | 15.24 | 27.8 | 39.05 | 29.6  | 22.94 | tr H0V9B7 H0V9B7_CAVPO | Uncharacterized protein (Fragment) OS=Cavia porcellus GN=MSN PE=4 SV=1     | CAVPO | 14 |
| 785 | 15.21 | 15.3 | 53.94 | 52.7  | 52.7  | tr H0W7R3 H0W7R3_CAVPO | Uncharacterized protein OS=Cavia porcellus GN=CLIC1 PE=4 SV=1              | CAVPO | 9  |
| 786 | 15.2  | 15.3 | 21.68 | 21.33 | 18.88 | tr H0V4I6 H0V4I6_CAVPO | Uncharacterized protein OS=Cavia porcellus GN=STX3 PE=3 SV=1               | CAVPO | 9  |
| 787 | 15.18 | 26.8 | 54.11 | 47.21 | 47.21 | tr H0V0F7 H0V0F7_CAVPO | Uncharacterized protein (Fragment) OS=Cavia porcellus GN=MAPK3 PE=4 SV=1   | CAVPO | 14 |
| 788 | 15.15 | 15.3 | 33.33 | 23.12 | 12.16 | tr H0V7U5 H0V7U5_CAVPO | Uncharacterized protein OS=Cavia porcellus GN=XPNPEP1 PE=3 SV=1            | CAVPO | 7  |
| 789 | 15.12 | 15.5 | 24.31 | 17.93 | 13.84 | tr H0VNC7 H0VNC7_CAVPO | Uncharacterized protein OS=Cavia porcellus GN=GRIPAP1 PE=4 SV=1            | CAVPO | 10 |
| 790 | 15.07 | 15.1 | 29.41 | 25.41 | 23.53 | tr H0W0W7 H0W0W7_CAVPO | Uncharacterized protein OS=Cavia porcellus GN=FAM98B PE=4 SV=1             | CAVPO | 8  |
| 791 | 15.07 | 15.2 | 33.42 | 32.64 | 32.64 | tr H0WDP3 H0WDP3_CAVPO | Uncharacterized protein (Fragment) OS=Cavia porcellus GN=ZNF385A PE=4 SV=1 | CAVPO | 8  |
| 792 | 15.06 | 22.8 | 63.82 | 60.16 | 56.1  | tr H0VHQ9 H0VHQ9_CAVPO | Uncharacterized protein OS=Cavia porcellus GN=YWHAH PE=3 SV=1              | CAVPO | 17 |
| 793 | 15.06 | 15.2 | 45.81 | 36.53 | 32.63 | tr H0VK04 H0VK04_CAVPO | Uncharacterized protein OS=Cavia porcellus GN=COPS5 PE=4 SV=1              | CAVPO | 9  |
| 794 | 14.97 | 16.2 | 26.2  | 20.54 | 17.14 | tr H0VTY6 H0VTY6_CAVPO | Uncharacterized protein OS=Cavia porcellus GN=LETM1 PE=4 SV=1              | CAVPO | 8  |
| 795 | 14.96 | 15   | 47.86 | 47.86 | 44.75 | tr H0VA51 H0VA51_CAVPO | Uncharacterized protein OS=Cavia porcellus GN=PRDX3 PE=4 SV=1              | CAVPO | 12 |
| 796 | 14.94 | 15.1 | 52.41 | 46.08 | 36.45 | tr H0W608 H0W608_CAVPO | Uncharacterized protein OS=Cavia porcellus GN=CHORDC1 PE=4 SV=1            | CAVPO | 9  |

|     |       |      |       |       |       |                        |                                                                               |       |    |
|-----|-------|------|-------|-------|-------|------------------------|-------------------------------------------------------------------------------|-------|----|
| 797 | 14.92 | 15   | 40.6  | 38.59 | 33.89 | tr H0UUD5 H0UUD5_CAVPO | Uncharacterized protein OS=Cavia porcellus<br>GN=ISOC1 PE=4 SV=1              | CAVPO | 7  |
| 798 | 14.86 | 15   | 17.79 | 17.66 | 13.43 | tr H0V956 H0V956_CAVPO | Uncharacterized protein (Fragment) OS=Cavia<br>porcellus GN=IMPG1 PE=4 SV=1   | CAVPO | 9  |
| 799 | 14.81 | 15.2 | 9.263 | 5.811 | 3.368 | tr H0VMT0 H0VMT0_CAVPO | Uncharacterized protein OS=Cavia porcellus<br>GN=CNOT1 PE=4 SV=1              | CAVPO | 7  |
| 800 | 14.79 | 14.9 | 35.12 | 23.7  | 17.63 | tr H0VU80 H0VU80_CAVPO | Uncharacterized protein OS=Cavia porcellus<br>GN=RPH3A PE=4 SV=1              | CAVPO | 8  |
| 801 | 14.78 | 15.1 | 26.73 | 15.22 | 11.39 | tr H0VGT0 H0VGT0_CAVPO | Uncharacterized protein (Fragment) OS=Cavia<br>porcellus GN=EPS15L1 PE=4 SV=1 | CAVPO | 8  |
| 802 | 14.78 | 14.8 | 23.4  | 17.88 | 15.56 | tr H0VLB8 H0VLB8_CAVPO | Uncharacterized protein OS=Cavia porcellus<br>GN=CDH2 PE=3 SV=1               | CAVPO | 12 |
| 803 | 14.77 | 14.9 | 40.33 | 31.65 | 19.71 | tr H0VJJ1 H0VJJ1_CAVPO | Uncharacterized protein OS=Cavia porcellus<br>GN=GLYR1 PE=4 SV=1              | CAVPO | 8  |
| 804 | 14.66 | 14.8 | 45.79 | 41.43 | 29.6  | tr H0UT26 H0UT26_CAVPO | Uncharacterized protein OS=Cavia porcellus<br>GN=TSTA3 PE=3 SV=1              | CAVPO | 8  |
| 805 | 14.63 | 14.7 | 25.96 | 25.96 | 25.96 | tr H0WE19 H0WE19_CAVPO | Uncharacterized protein OS=Cavia porcellus<br>GN=KHDRBS1 PE=4 SV=1            | CAVPO | 9  |
| 806 | 14.62 | 14.7 | 35.92 | 33.62 | 33.62 | tr H0VCT5 H0VCT5_CAVPO | Uncharacterized protein OS=Cavia porcellus<br>GN=GALE PE=3 SV=1               | CAVPO | 9  |
| 807 | 14.6  | 14.8 | 14.92 | 8.305 | 5.085 | tr H0VI14 H0VI14_CAVPO | Uncharacterized protein (Fragment) OS=Cavia<br>porcellus GN=TJP1 PE=4 SV=1    | CAVPO | 8  |
| 808 | 14.57 | 14.7 | 24.58 | 22.36 | 14.72 | tr H0V2Q8 H0V2Q8_CAVPO | Uncharacterized protein OS=Cavia porcellus<br>GN=ACSL3 PE=4 SV=1              | CAVPO | 7  |
| 809 | 14.57 | 14.6 | 42.01 | 42.01 | 32.29 | tr H0V8G5 H0V8G5_CAVPO | Uncharacterized protein (Fragment) OS=Cavia<br>porcellus GN=AIMP1 PE=4 SV=1   | CAVPO | 8  |
| 810 | 14.56 | 14.6 | 26.89 | 24.44 | 24.44 | tr H0VVP2 H0VVP2_CAVPO | Clusterin (Fragment) OS=Cavia porcellus<br>GN=CLU PE=3 SV=1                   | CAVPO | 8  |

|     |       |      |       |       |       |                        |                                                                                                                              |       |    |
|-----|-------|------|-------|-------|-------|------------------------|------------------------------------------------------------------------------------------------------------------------------|-------|----|
| 811 | 14.55 | 14.7 | 12.31 | 9.9   | 8.153 | tr H0V362 H0V362_CAVPO | Uncharacterized protein OS=Cavia porcellus<br>GN=SLC4A7 PE=4 SV=1                                                            | CAVPO | 8  |
| 812 | 14.54 | 30.7 | 45.98 | 45.98 | 43.22 | tr H0V478 H0V478_CAVPO | Uncharacterized protein (Fragment) OS=Cavia<br>porcellus GN=EIF4A1 PE=3 SV=1                                                 | CAVPO | 17 |
| 813 | 14.52 | 14.6 | 25.54 | 22.66 | 22.66 | tr H0UY85 H0UY85_CAVPO | Uncharacterized protein OS=Cavia porcellus<br>GN=GPM6A PE=4 SV=1                                                             | CAVPO | 10 |
| 814 | 14.51 | 14.7 | 31.72 | 28.57 | 20.8  | tr H0UXI4 H0UXI4_CAVPO | Uncharacterized protein (Fragment) OS=Cavia<br>porcellus GN=RABEP2 PE=4 SV=1                                                 | CAVPO | 8  |
| 815 | 14.51 | 14.6 | 29.2  | 27.43 | 25.37 | tr H0V7B3 H0V7B3_CAVPO | Uncharacterized protein OS=Cavia porcellus<br>GN=ERLIN2 PE=4 SV=1                                                            | CAVPO | 7  |
| 816 | 14.5  | 14.6 | 35.83 | 32.25 | 31.27 | tr H0UZG2 H0UZG2_CAVPO | Uncharacterized protein (Fragment) OS=Cavia<br>porcellus PE=4 SV=1                                                           | CAVPO | 10 |
| 817 | 14.49 | 14.6 | 49.83 | 47.39 | 31.71 | tr H0UZ78 H0UZ78_CAVPO | Uncharacterized protein OS=Cavia porcellus<br>GN=GNPDA1 PE=3 SV=1                                                            | CAVPO | 9  |
| 818 | 14.49 | 16.6 | 33.26 | 30.37 | 24.17 | tr H0VH83 H0VH83_CAVPO | Uncharacterized protein OS=Cavia porcellus<br>GN=Ddx6 PE=3 SV=1                                                              | CAVPO | 8  |
| 819 | 14.48 | 15.2 | 30.1  | 25.11 | 13.27 | tr H0VWN4 H0VWN4_CAVPO | Uncharacterized protein (Fragment) OS=Cavia<br>porcellus GN=SART1 PE=4 SV=1                                                  | CAVPO | 7  |
| 820 | 14.46 | 14.7 | 18.94 | 15.51 | 8.826 | tr H0VHF0 H0VHF0_CAVPO | Uncharacterized protein OS=Cavia porcellus<br>GN=NRD1 PE=3 SV=1                                                              | CAVPO | 9  |
| 821 | 14.45 | 14.6 | 36.85 | 21.57 | 19.78 | tr H0VUU6 H0VUU6_CAVPO | Serine/threonine-protein phosphatase 2A 55<br>kDa regulatory subunit B (Fragment)<br>OS=Cavia porcellus GN=PPP2R2A PE=3 SV=1 | CAVPO | 8  |
| 822 | 14.44 | 14.5 | 30.06 | 30.06 | 26.59 | tr H0VGD6 H0VGD6_CAVPO | Uncharacterized protein OS=Cavia porcellus<br>GN=Opn1sw PE=3 SV=1                                                            | CAVPO | 10 |
| 823 | 14.43 | 14.5 | 50.39 | 50.39 | 50.39 | tr H0V5T6 H0V5T6_CAVPO | Uncharacterized protein OS=Cavia porcellus<br>GN=SUB1 PE=4 SV=1                                                              | CAVPO | 9  |
| 824 | 14.43 | 14.5 | 35.42 | 32.44 | 27.98 | tr H0V826 H0V826_CAVPO | Uncharacterized protein OS=Cavia porcellus                                                                                   | CAVPO | 8  |

|     |       |      |       |       |       |                        |                                                                                                                                      |       |    |
|-----|-------|------|-------|-------|-------|------------------------|--------------------------------------------------------------------------------------------------------------------------------------|-------|----|
|     |       |      |       |       |       |                        | GN=VPS26B PE=4 SV=1                                                                                                                  |       |    |
| 825 | 14.42 | 14.5 | 27.87 | 21.35 | 20    | tr H0UZD0 H0UZD0_CAVPO | Dolichyl-diphosphooligosaccharide--protein<br>glycosyltransferase 48 kDa subunit (Fragment)<br>OS=Cavia porcellus GN=DDOST PE=3 SV=1 | CAVPO | 8  |
| 826 | 14.4  | 14.6 | 16.16 | 11.47 | 7.01  | tr H0UW78 H0UW78_CAVPO | Uncharacterized protein OS=Cavia porcellus<br>GN=SUPT6H PE=4 SV=1                                                                    | CAVPO | 8  |
| 827 | 14.4  | 14.5 | 83.9  | 83.9  | 77.97 | tr H0W7H4 H0W7H4_CAVPO | Uncharacterized protein (Fragment) OS=Cavia<br>porcellus GN=TCEB2 PE=4 SV=1                                                          | CAVPO | 8  |
| 828 | 14.38 | 15.8 | 36.81 | 36.81 | 34.89 | tr H0VP33 H0VP33_CAVPO | Uncharacterized protein (Fragment) OS=Cavia<br>porcellus GN=PTPLAD1 PE=4 SV=1                                                        | CAVPO | 13 |
| 829 | 14.37 | 14.4 | 39.38 | 37.5  | 30.94 | tr H0UUU1 H0UUU1_CAVPO | Uncharacterized protein (Fragment) OS=Cavia<br>porcellus GN=RDH12 PE=3 SV=1                                                          | CAVPO | 7  |
| 830 | 14.34 | 14.5 | 37.55 | 31.74 | 27.8  | tr H0VKK5 H0VKK5_CAVPO | Uncharacterized protein OS=Cavia porcellus<br>GN=G3BP2 PE=4 SV=1                                                                     | CAVPO | 11 |
| 831 | 14.34 | 14.4 | 34.12 | 28.95 | 17.13 | tr H0W7X2 H0W7X2_CAVPO | Uncharacterized protein (Fragment) OS=Cavia<br>porcellus GN=DBN1 PE=4 SV=1                                                           | CAVPO | 7  |
| 832 | 14.3  | 14.4 | 47.46 | 31.07 | 31.07 | tr H0W4Y1 H0W4Y1_CAVPO | Uncharacterized protein OS=Cavia porcellus<br>GN=Thumpd1 PE=4 SV=1                                                                   | CAVPO | 8  |
| 833 | 14.28 | 14.6 | 41.5  | 31.07 | 24.03 | tr H0UTF0 H0UTF0_CAVPO | Uncharacterized protein (Fragment) OS=Cavia<br>porcellus GN=ARRB1 PE=4 SV=1                                                          | CAVPO | 8  |
| 834 | 14.28 | 14.7 | 14.81 | 14.68 | 12.86 | tr H0VQB7 H0VQB7_CAVPO | Uncharacterized protein (Fragment) OS=Cavia<br>porcellus GN=Hcn1 PE=4 SV=1                                                           | CAVPO | 8  |
| 835 | 14.28 | 14.4 | 48.09 | 47.66 | 45.11 | tr H0W0X2 H0W0X2_CAVPO | Uncharacterized protein OS=Cavia porcellus<br>GN=RGS9BP PE=4 SV=1                                                                    | CAVPO | 8  |
| 836 | 14.27 | 14.3 | 14.95 | 14.8  | 13.9  | tr H0W436 H0W436_CAVPO | Uncharacterized protein OS=Cavia porcellus<br>GN=TMEM201 PE=4 SV=1                                                                   | CAVPO | 10 |
| 837 | 14.24 | 14.4 | 21.43 | 15.28 | 12.57 | tr H0W379 H0W379_CAVPO | Uncharacterized protein OS=Cavia porcellus<br>GN=Ubp2l PE=4 SV=1                                                                     | CAVPO | 7  |

|     |       |      |       |       |       |                        |                                                                             |       |    |
|-----|-------|------|-------|-------|-------|------------------------|-----------------------------------------------------------------------------|-------|----|
| 838 | 14.22 | 14.4 | 23.41 | 17.33 | 13.49 | tr H0VDQ5 H0VDQ5_CAVPO | Uncharacterized protein OS=Cavia porcellus<br>GN=UBTF PE=4 SV=1             | CAVPO | 9  |
| 839 | 14.21 | 16.5 | 43.4  | 40.88 | 34.91 | tr H0V2N6 H0V2N6_CAVPO | Uncharacterized protein (Fragment) OS=Cavia<br>porcellus GN=GNAQ PE=4 SV=1  | CAVPO | 9  |
| 840 | 14.21 | 14.2 | 53.7  | 53.24 | 46.76 | tr H0V568 H0V568_CAVPO | Uncharacterized protein OS=Cavia porcellus<br>GN=RAB5A PE=3 SV=1            | CAVPO | 7  |
| 841 | 14.21 | 14.3 | 31.09 | 23.64 | 18    | tr H0V5R5 H0V5R5_CAVPO | Uncharacterized protein OS=Cavia porcellus<br>GN=Cttn PE=4 SV=1             | CAVPO | 7  |
| 842 | 14.21 | 14.3 | 59.11 | 48.44 | 43.11 | tr H0VYK1 H0VYK1_CAVPO | Uncharacterized protein OS=Cavia porcellus<br>GN=BCAS2 PE=4 SV=1            | CAVPO | 8  |
| 843 | 14.2  | 14.3 | 23.22 | 23.22 | 19.19 | tr H0UTI6 H0UTI6_CAVPO | Uncharacterized protein OS=Cavia porcellus<br>GN=SNX1 PE=4 SV=1             | CAVPO | 8  |
| 844 | 14.17 | 14.3 | 24.35 | 21.41 | 17.32 | tr H0V5U4 H0V5U4_CAVPO | Uncharacterized protein (Fragment) OS=Cavia<br>porcellus GN=Eif4b PE=4 SV=1 | CAVPO | 10 |
| 845 | 14.14 | 14.2 | 39.02 | 30.23 | 27.65 | tr H0VX68 H0VX68_CAVPO | Uncharacterized protein OS=Cavia porcellus<br>GN=NAP1L4 PE=3 SV=1           | CAVPO | 10 |
| 846 | 14.13 | 14.3 | 31.74 | 28.77 | 21.92 | tr H0VH03 H0VH03_CAVPO | Uncharacterized protein (Fragment) OS=Cavia<br>porcellus GN=TMX3 PE=4 SV=1  | CAVPO | 8  |
| 847 | 14.12 | 14.4 | 63.91 | 60    | 57.83 | tr H0VL12 H0VL12_CAVPO | Uncharacterized protein OS=Cavia porcellus<br>GN=UCHL3 PE=4 SV=1            | CAVPO | 10 |
| 848 | 14.12 | 15.4 | 32.2  | 27.43 | 17.89 | tr H0VY56 H0VY56_CAVPO | Uncharacterized protein OS=Cavia porcellus<br>GN=LOC100713505 PE=4 SV=1     | CAVPO | 10 |
| 849 | 14.09 | 22.4 | 61.38 | 60.98 | 60.98 | tr H0WBK0 H0WBK0_CAVPO | Uncharacterized protein OS=Cavia porcellus<br>GN=YWHAB PE=3 SV=1            | CAVPO | 23 |
| 850 | 14.05 | 14.4 | 62.43 | 52.91 | 48.15 | tr H0VNW9 H0VNW9_CAVPO | Uncharacterized protein OS=Cavia porcellus<br>GN=HEBP1 PE=4 SV=1            | CAVPO | 8  |
| 851 | 14.04 | 14   | 60.47 | 60.47 | 53.49 | tr H0V2V6 H0V2V6_CAVPO | Galectin OS=Cavia porcellus GN=LGALSL<br>PE=4 SV=1                          | CAVPO | 8  |

|     |       |      |       |       |       |                        |                                                                               |       |    |
|-----|-------|------|-------|-------|-------|------------------------|-------------------------------------------------------------------------------|-------|----|
| 852 | 14.04 | 14   | 23.62 | 21.77 | 21.77 | tr H0VA62 H0VA62_CAVPO | Uncharacterized protein OS=Cavia porcellus<br>GN=SLC1A3 PE=4 SV=1             | CAVPO | 14 |
| 853 | 14.02 | 14   | 28.33 | 24.91 | 24.91 | tr H0UXF8 H0UXF8_CAVPO | Uncharacterized protein OS=Cavia porcellus<br>GN=ELMOD2 PE=4 SV=1             | CAVPO | 8  |
| 854 | 14.02 | 14.1 | 40    | 31.65 | 25.82 | tr H0W1G1 H0W1G1_CAVPO | Uncharacterized protein OS=Cavia porcellus<br>GN=TERF2IP PE=4 SV=1            | CAVPO | 8  |
| 855 | 14    | 14   | 53.38 | 53.38 | 53.38 | tr H0UTX4 H0UTX4_CAVPO | 40S ribosomal protein S12 OS=Cavia porcellus<br>GN=Rps12 PE=3 SV=1            | CAVPO | 8  |
| 856 | 14    | 14   | 32    | 30.4  | 30.4  | tr H0VJ66 H0VJ66_CAVPO | Uncharacterized protein OS=Cavia porcellus<br>GN=NDRG3 PE=4 SV=1              | CAVPO | 7  |
| 857 | 13.97 | 14.5 | 19.25 | 15.34 | 9.311 | tr H0UWK4 H0UWK4_CAVPO | Uncharacterized protein OS=Cavia porcellus<br>GN=Smchd1 PE=4 SV=1             | CAVPO | 9  |
| 858 | 13.96 | 14   | 28.8  | 28.53 | 25.27 | tr H0V755 H0V755_CAVPO | Uncharacterized protein (Fragment) OS=Cavia<br>porcellus GN=ADPRHL2 PE=4 SV=1 | CAVPO | 7  |
| 859 | 13.96 | 14.1 | 13.37 | 10.59 | 6.441 | tr H0VB24 H0VB24_CAVPO | Uncharacterized protein (Fragment) OS=Cavia<br>porcellus PE=4 SV=1            | CAVPO | 7  |
| 860 | 13.95 | 14.1 | 24.47 | 21.73 | 21.73 | tr H0VMP9 H0VMP9_CAVPO | Uncharacterized protein (Fragment) OS=Cavia<br>porcellus GN=SCARB2 PE=4 SV=1  | CAVPO | 8  |
| 861 | 13.92 | 14.1 | 25.77 | 23.77 | 19.78 | tr H0VRZ2 H0VRZ2_CAVPO | Uncharacterized protein OS=Cavia porcellus<br>GN=METTL16 PE=4 SV=1            | CAVPO | 8  |
| 862 | 13.91 | 14   | 22.81 | 17.89 | 16.49 | tr H0UYT2 H0UYT2_CAVPO | Uncharacterized protein OS=Cavia porcellus<br>GN=VPS45 PE=4 SV=1              | CAVPO | 9  |
| 863 | 13.89 | 13.9 | 41.38 | 33.45 | 28.97 | tr H0UZW4 H0UZW4_CAVPO | Uncharacterized protein (Fragment) OS=Cavia<br>porcellus GN=FHL1 PE=4 SV=1    | CAVPO | 9  |
| 864 | 13.88 | 14.2 | 18.86 | 14.68 | 9.539 | tr H0VMZ6 H0VMZ6_CAVPO | Uncharacterized protein OS=Cavia porcellus<br>GN=MTHFD1 PE=3 SV=1             | CAVPO | 7  |
| 865 | 13.87 | 14   | 34.03 | 22.96 | 20.46 | tr H0VE77 H0VE77_CAVPO | Uncharacterized protein OS=Cavia porcellus<br>GN=PPM1B PE=3 SV=1              | CAVPO | 9  |

|     |       |      |       |       |       |                        |                                                                              |       |    |
|-----|-------|------|-------|-------|-------|------------------------|------------------------------------------------------------------------------|-------|----|
| 866 | 13.83 | 50.5 | 25.38 | 18.93 | 13.13 | tr H0UUY7 H0UUY7_CAVPO | Uncharacterized protein OS=Cavia porcellus<br>GN=MAP1A PE=4 SV=1             | CAVPO | 25 |
| 867 | 13.83 | 14.1 | 22.75 | 10.83 | 8.28  | tr H0UXI3 H0UXI3_CAVPO | Uncharacterized protein OS=Cavia porcellus<br>GN=SRGAP3 PE=4 SV=1            | CAVPO | 7  |
| 868 | 13.83 | 13.9 | 28.04 | 26.74 | 22.61 | tr H0V4J7 H0V4J7_CAVPO | Uncharacterized protein (Fragment) OS=Cavia<br>porcellus GN=BLMH PE=4 SV=1   | CAVPO | 9  |
| 869 | 13.82 | 14.2 | 40.06 | 36.69 | 30.53 | tr H0VN79 H0VN79_CAVPO | Uncharacterized protein (Fragment) OS=Cavia<br>porcellus GN=Sept3 PE=3 SV=1  | CAVPO | 10 |
| 870 | 13.8  | 13.8 | 50.69 | 43.78 | 43.78 | tr H0VZ77 H0VZ77_CAVPO | Uncharacterized protein OS=Cavia porcellus<br>GN=PRDX5 PE=4 SV=1             | CAVPO | 8  |
| 871 | 13.78 | 13.9 | 32.84 | 29.1  | 29.1  | tr H0VLK8 H0VLK8_CAVPO | Uncharacterized protein OS=Cavia porcellus<br>GN=Rad23b PE=4 SV=1            | CAVPO | 7  |
| 872 | 13.72 | 13.8 | 32.69 | 31.04 | 31.04 | tr H0VI56 H0VI56_CAVPO | Uncharacterized protein OS=Cavia porcellus<br>GN=NDRG1 PE=4 SV=1             | CAVPO | 7  |
| 873 | 13.72 | 13.8 | 44.16 | 43.29 | 39.39 | tr H0WD22 H0WD22_CAVPO | Uncharacterized protein (Fragment) OS=Cavia<br>porcellus GN=Vapb PE=4 SV=1   | CAVPO | 7  |
| 874 | 13.71 | 13.8 | 40.75 | 36.64 | 34.25 | tr H0V324 H0V324_CAVPO | Uncharacterized protein OS=Cavia porcellus<br>GN=CDK5 PE=4 SV=1              | CAVPO | 8  |
| 875 | 13.7  | 13.7 | 34.11 | 32.11 | 26.09 | tr H0VBK0 H0VBK0_CAVPO | Uncharacterized protein (Fragment) OS=Cavia<br>porcellus GN=LZTFL1 PE=4 SV=1 | CAVPO | 8  |
| 876 | 13.68 | 13.8 | 49.74 | 48.72 | 45.64 | tr H0VL90 H0VL90_CAVPO | Uncharacterized protein OS=Cavia porcellus<br>GN=PGRMC1 PE=4 SV=1            | CAVPO | 10 |
| 877 | 13.68 | 13.9 | 41.67 | 32.07 | 28.79 | tr H0VUU0 H0VUU0_CAVPO | Obg-like ATPase 1 OS=Cavia porcellus<br>GN=Ola1 PE=3 SV=1                    | CAVPO | 10 |
| 878 | 13.67 | 13.8 | 36.13 | 33.53 | 33.53 | tr H0UZW0 H0UZW0_CAVPO | Uncharacterized protein OS=Cavia porcellus<br>GN=SUCLG1 PE=3 SV=1            | CAVPO | 10 |
| 879 | 13.66 | 13.7 | 49.02 | 49.02 | 48.53 | tr H0UX57 H0UX57_CAVPO | Rho GDP-dissociation inhibitor 1 OS=Cavia<br>porcellus GN=ARHGDI1 PE=4 SV=1  | CAVPO | 9  |



|     |       |      |       |       |       |                        |                                                                             |       |    |
|-----|-------|------|-------|-------|-------|------------------------|-----------------------------------------------------------------------------|-------|----|
| 880 | 13.63 | 13.8 | 21.48 | 19.47 | 12.21 | tr H0W7I3 H0W7I3_CAVPO | Uncharacterized protein (Fragment) OS=Cavia porcellus GN=CACNA2D2 PE=4 SV=1 | CAVPO | 7  |
| 881 | 13.62 | 17.6 | 7.792 | 3.043 | 1.706 | tr H0V4N0 H0V4N0_CAVPO | Uncharacterized protein (Fragment) OS=Cavia porcellus GN=DST PE=4 SV=1      | CAVPO | 10 |
| 882 | 13.61 | 14   | 25.06 | 19.86 | 12.29 | tr H0VJH3 H0VJH3_CAVPO | Uncharacterized protein OS=Cavia porcellus GN=AGO1 PE=4 SV=1                | CAVPO | 8  |
| 883 | 13.61 | 13.7 | 21.96 | 17.97 | 17.97 | tr H0VST5 H0VST5_CAVPO | Uncharacterized protein OS=Cavia porcellus GN=CPSF6 PE=4 SV=1               | CAVPO | 9  |
| 884 | 13.59 | 13.8 | 16.35 | 9.03  | 7.383 | tr H0WCJ1 H0WCJ1_CAVPO | Uncharacterized protein OS=Cavia porcellus GN=PTPN23 PE=4 SV=1              | CAVPO | 8  |
| 885 | 13.57 | 13.7 | 47.37 | 47.37 | 47.37 | tr H0V472 H0V472_CAVPO | Uncharacterized protein OS=Cavia porcellus GN=U2AF1 PE=4 SV=1               | CAVPO | 11 |
| 886 | 13.56 | 13.7 | 21.2  | 10.95 | 8.722 | tr H0V6M3 H0V6M3_CAVPO | Uncharacterized protein (Fragment) OS=Cavia porcellus GN=OPA1 PE=3 SV=1     | CAVPO | 8  |
| 887 | 13.56 | 13.6 | 42.01 | 41.64 | 33.83 | tr H0VK78 H0VK78_CAVPO | Uncharacterized protein (Fragment) OS=Cavia porcellus GN=ELAVL1 PE=4 SV=1   | CAVPO | 9  |
| 888 | 13.51 | 13.6 | 57.66 | 54.95 | 49.55 | tr H0VKS2 H0VKS2_CAVPO | Cytochrome b-c1 complex subunit 7 OS=Cavia porcellus GN=UQCRB PE=3 SV=1     | CAVPO | 7  |
| 889 | 13.49 | 13.5 | 28.48 | 27.51 | 24.92 | tr H0V2N0 H0V2N0_CAVPO | Uncharacterized protein OS=Cavia porcellus GN=Atp1b1 PE=3 SV=1              | CAVPO | 7  |
| 890 | 13.47 | 13.5 | 64.11 | 55.02 | 55.02 | tr H0VJX3 H0VJX3_CAVPO | Uncharacterized protein (Fragment) OS=Cavia porcellus GN=Sarnp PE=4 SV=1    | CAVPO | 7  |
| 891 | 13.45 | 13.5 | 46.72 | 46.31 | 39.75 | tr H0VC50 H0VC50_CAVPO | Uncharacterized protein (Fragment) OS=Cavia porcellus GN=QDPR PE=4 SV=1     | CAVPO | 8  |
| 892 | 13.43 | 14.4 | 14.17 | 12.33 | 7.084 | tr H0V3B0 H0V3B0_CAVPO | Uncharacterized protein (Fragment) OS=Cavia porcellus GN=XPO7 PE=4 SV=1     | CAVPO | 8  |
| 893 | 13.41 | 13.6 | 23.25 | 18.03 | 15.54 | tr H0UYN9 H0UYN9_CAVPO | Uncharacterized protein OS=Cavia porcellus GN=RBM25 PE=4 SV=1               | CAVPO | 9  |

|     |       |      |       |       |       |                        |                                                                           |       |    |
|-----|-------|------|-------|-------|-------|------------------------|---------------------------------------------------------------------------|-------|----|
| 894 | 13.41 | 13.5 | 53.42 | 52.99 | 52.99 | tr H0VN17 H0VN17_CAVPO | Proteasome subunit alpha type OS=Cavia porcellus GN=Psm2 PE=3 SV=1        | CAVPO | 11 |
| 895 | 13.39 | 15.6 | 53.96 | 53.96 | 50    | tr H0VI61 H0VI61_CAVPO | Uncharacterized protein OS=Cavia porcellus GN=LOC100724499 PE=4 SV=1      | CAVPO | 9  |
| 896 | 13.38 | 13.5 | 49.74 | 46.03 | 46.03 | tr H0VHH8 H0VHH8_CAVPO | Uncharacterized protein OS=Cavia porcellus GN=KRAS PE=4 SV=1              | CAVPO | 8  |
| 897 | 13.34 | 13.5 | 32.34 | 30.03 | 27.39 | tr H0V8T5 H0V8T5_CAVPO | Uncharacterized protein (Fragment) OS=Cavia porcellus GN=CRK PE=4 SV=1    | CAVPO | 7  |
| 898 | 13.34 | 13.5 | 59.07 | 52.33 | 47.15 | tr H0VQ69 H0VQ69_CAVPO | Uncharacterized protein OS=Cavia porcellus GN=RHOA PE=3 SV=1              | CAVPO | 10 |
| 899 | 13.33 | 13.4 | 44.9  | 38.1  | 31.63 | tr H0VFX8 H0VFX8_CAVPO | Uncharacterized protein OS=Cavia porcellus GN=LRRC59 PE=4 SV=1            | CAVPO | 7  |
| 900 | 13.29 | 13.4 | 59.34 | 51.1  | 51.1  | tr H0UU46 H0UU46_CAVPO | Uncharacterized protein (Fragment) OS=Cavia porcellus GN=Vps29 PE=4 SV=1  | CAVPO | 7  |
| 901 | 13.28 | 13.3 | 49.5  | 49.5  | 46.5  | tr H0VU00 H0VU00_CAVPO | Uncharacterized protein OS=Cavia porcellus GN=GUCA1A PE=4 SV=1            | CAVPO | 8  |
| 902 | 13.27 | 13.3 | 59.8  | 59.8  | 59.8  | tr H0VUC2 H0VUC2_CAVPO | Uncharacterized protein (Fragment) OS=Cavia porcellus GN=HSPE1 PE=3 SV=1  | CAVPO | 7  |
| 903 | 13.26 | 13.4 | 81.15 | 80.33 | 80.33 | tr H0WCV4 H0WCV4_CAVPO | Uncharacterized protein (Fragment) OS=Cavia porcellus GN=PCP2 PE=4 SV=1   | CAVPO | 10 |
| 904 | 13.25 | 13.4 | 34.75 | 29.08 | 24.35 | tr H0VZ95 H0VZ95_CAVPO | Uncharacterized protein (Fragment) OS=Cavia porcellus GN=ACADSB PE=3 SV=1 | CAVPO | 7  |
| 905 | 13.24 | 13.5 | 30.4  | 24.07 | 12.35 | tr H0VQM0 H0VQM0_CAVPO | Uncharacterized protein OS=Cavia porcellus GN=MPP4 PE=4 SV=1              | CAVPO | 7  |
| 906 | 13.19 | 13.2 | 33.77 | 23.82 | 23.82 | tr H0VMM4 H0VMM4_CAVPO | Uncharacterized protein OS=Cavia porcellus GN=ACOT7 PE=4 SV=1             | CAVPO | 8  |
| 907 | 13.17 | 13.3 | 54.23 | 54.23 | 54.23 | tr H0VP39 H0VP39_CAVPO | Uncharacterized protein OS=Cavia porcellus GN=COTL1 PE=4 SV=1             | CAVPO | 8  |

|     |       |      |       |       |       |                        |                                                                                      |       |    |
|-----|-------|------|-------|-------|-------|------------------------|--------------------------------------------------------------------------------------|-------|----|
| 908 | 13.16 | 13.4 | 19.46 | 19.29 | 16.61 | tr H0V8K5 H0V8K5_CAVPO | Uncharacterized protein OS=Cavia porcellus<br>GN=SLC17A7 PE=4 SV=1                   | CAVPO | 7  |
| 909 | 13.15 | 13.2 | 36    | 35.56 | 35.56 | tr H0V3F6 H0V3F6_CAVPO | Uncharacterized protein (Fragment) OS=Cavia<br>porcellus GN=TMED10 PE=3 SV=1         | CAVPO | 7  |
| 910 | 13.14 | 13.3 | 44.05 | 44.05 | 39.21 | tr H0V1I1 H0V1I1_CAVPO | Uncharacterized protein OS=Cavia porcellus<br>GN=NUDT21 PE=4 SV=1                    | CAVPO | 8  |
| 911 | 13.13 | 13.4 | 37.54 | 29.77 | 29.77 | tr H0VGU6 H0VGU6_CAVPO | Uncharacterized protein OS=Cavia porcellus<br>GN=FN3KRP PE=4 SV=1                    | CAVPO | 8  |
| 912 | 13.13 | 13.2 | 39.89 | 39.89 | 33.33 | tr H0W8M2 H0W8M2_CAVPO | Uncharacterized protein OS=Cavia porcellus<br>GN=CBX3 PE=4 SV=1                      | CAVPO | 7  |
| 913 | 13.12 | 13.2 | 43.98 | 37.05 | 37.05 | tr H0VQC8 H0VQC8_CAVPO | Uncharacterized protein (Fragment) OS=Cavia<br>porcellus GN=ASRGL1 PE=1 SV=1         | CAVPO | 8  |
| 914 | 13.11 | 13.3 | 27.73 | 20.6  | 12.52 | tr H0UTP3 H0UTP3_CAVPO | Uncharacterized protein (Fragment) OS=Cavia<br>porcellus GN=GUCY1A2 PE=3 SV=1        | CAVPO | 6  |
| 915 | 13.1  | 15.4 | 52.61 | 48.34 | 45.5  | tr H0VCP3 H0VCP3_CAVPO | Uncharacterized protein OS=Cavia porcellus<br>GN=Rac1 PE=3 SV=1                      | CAVPO | 9  |
| 916 | 13.08 | 13.3 | 30.2  | 16.87 | 13.68 | tr H0VGH8 H0VGH8_CAVPO | Uncharacterized protein OS=Cavia porcellus<br>GN=CTNNBL1 PE=4 SV=1                   | CAVPO | 8  |
| 917 | 13.08 | 13.1 | 24.18 | 22.44 | 20.5  | tr H0VKC2 H0VKC2_CAVPO | Uncharacterized protein (Fragment) OS=Cavia<br>porcellus GN=TXNRD1 PE=3 SV=1         | CAVPO | 7  |
| 918 | 13.08 | 13.2 | 34.85 | 32.58 | 32.58 | tr H0VKQ8 H0VKQ8_CAVPO | Uncharacterized protein (Fragment) OS=Cavia<br>porcellus GN=ECHS1 PE=3 SV=1          | CAVPO | 7  |
| 919 | 13.06 | 20.8 | 38.36 | 33.96 | 28.72 | tr H0VUZ3 H0VUZ3_CAVPO | Uncharacterized protein OS=Cavia porcellus<br>GN=CTNNA2 PE=4 SV=1                    | CAVPO | 13 |
| 920 | 13.03 | 13.1 | 49.02 | 37.58 | 26.47 | tr H0V5Z0 H0V5Z0_CAVPO | Uncharacterized protein (Fragment) OS=Cavia<br>porcellus GN=ABHD10 PE=4 SV=1         | CAVPO | 7  |
| 921 | 13.02 | 13.2 | 79.73 | 64.86 | 55.41 | tr H0VCC3 H0VCC3_CAVPO | Guanine nucleotide-binding protein subunit<br>gamma OS=Cavia porcellus GN=GNGT1 PE=3 | CAVPO | 10 |

|     |       |      |       |       |       |                        |                                                                           |       |    |
|-----|-------|------|-------|-------|-------|------------------------|---------------------------------------------------------------------------|-------|----|
|     |       |      |       |       |       |                        | SV=1                                                                      |       |    |
| 922 | 13    | 13.2 | 29.69 | 26.82 | 18.01 | tr H0V9V3 H0V9V3_CAVPO | Uncharacterized protein (Fragment) OS=Cavia porcellus GN=ZNF326 PE=4 SV=1 | CAVPO | 10 |
| 923 | 12.99 | 13.1 | 41.28 | 39.24 | 24.71 | tr H0V9B5 H0V9B5_CAVPO | Uncharacterized protein OS=Cavia porcellus GN=CDC42EP4 PE=4 SV=1          | CAVPO | 6  |
| 924 | 12.98 | 13.1 | 60.21 | 47.64 | 42.93 | tr H0UUN1 H0UUN1_CAVPO | Uncharacterized protein OS=Cavia porcellus GN=VSNL1 PE=4 SV=1             | CAVPO | 7  |
| 925 | 12.98 | 13   | 32.39 | 29.25 | 29.25 | tr H0VU35 H0VU35_CAVPO | Uncharacterized protein OS=Cavia porcellus GN=PRPS1 PE=4 SV=1             | CAVPO | 7  |
| 926 | 12.95 | 13.1 | 26.72 | 22.5  | 14.84 | tr H0VI00 H0VI00_CAVPO | Uncharacterized protein OS=Cavia porcellus GN=PCK2 PE=3 SV=1              | CAVPO | 6  |
| 927 | 12.94 | 13.5 | 11.94 | 4.146 | 2.034 | tr H0V437 H0V437_CAVPO | Uncharacterized protein (Fragment) OS=Cavia porcellus GN=AKAP9 PE=4 SV=1  | CAVPO | 7  |
| 928 | 12.92 | 13   | 29.62 | 16.82 | 15.72 | tr H0VSJ7 H0VSJ7_CAVPO | Uncharacterized protein (Fragment) OS=Cavia porcellus GN=NCOA5 PE=4 SV=1  | CAVPO | 8  |
| 929 | 12.91 | 13   | 52.73 | 52.73 | 42.42 | tr H0V5S5 H0V5S5_CAVPO | Uncharacterized protein (Fragment) OS=Cavia porcellus GN=DSTN PE=4 SV=1   | CAVPO | 8  |
| 930 | 12.89 | 13   | 34.08 | 27.93 | 27.93 | tr H0UVC6 H0UVC6_CAVPO | Uncharacterized protein OS=Cavia porcellus GN=DNAJB11 PE=4 SV=1           | CAVPO | 7  |
| 931 | 12.86 | 13   | 35.38 | 35.1  | 26.74 | tr H0V290 H0V290_CAVPO | Uncharacterized protein (Fragment) OS=Cavia porcellus GN=LMAN2 PE=4 SV=1  | CAVPO | 8  |
| 932 | 12.83 | 13.1 | 25.62 | 20.22 | 13.99 | tr H0W1W7 H0W1W7_CAVPO | Uncharacterized protein OS=Cavia porcellus GN=SARM1 PE=4 SV=1             | CAVPO | 8  |
| 933 | 12.82 | 13.1 | 26.46 | 26.46 | 18.97 | tr H0UY99 H0UY99_CAVPO | Uncharacterized protein (Fragment) OS=Cavia porcellus GN=RCC2 PE=4 SV=1   | CAVPO | 8  |
| 934 | 12.81 | 12.9 | 39.05 | 38.69 | 35.04 | tr H0VN38 H0VN38_CAVPO | Uncharacterized protein OS=Cavia porcellus GN=STX12 PE=3 SV=1             | CAVPO | 8  |

|     |       |      |       |       |       |                        |                                                                                                 |       |    |
|-----|-------|------|-------|-------|-------|------------------------|-------------------------------------------------------------------------------------------------|-------|----|
| 935 | 12.8  | 13.1 | 26.82 | 21.36 | 19.32 | tr H0W1R5 H0W1R5_CAVPO | Uncharacterized protein OS=Cavia porcellus<br>GN=SNRNP70 PE=4 SV=1                              | CAVPO | 8  |
| 936 | 12.79 | 12.9 | 31.83 | 31.83 | 31.51 | tr H0V8S4 H0V8S4_CAVPO | Uncharacterized protein (Fragment) OS=Cavia<br>porcellus GN=CNN3 PE=4 SV=1                      | CAVPO | 7  |
| 937 | 12.78 | 13.2 | 28.16 | 27.91 | 21.36 | tr H0V901 H0V901_CAVPO | Uncharacterized protein OS=Cavia porcellus<br>GN=DNAJA2 PE=3 SV=1                               | CAVPO | 7  |
| 938 | 12.74 | 12.8 | 29.24 | 25.85 | 23.76 | tr H0VBP6 H0VBP6_CAVPO | Uncharacterized protein OS=Cavia porcellus<br>GN=HDHD2 PE=4 SV=1                                | CAVPO | 6  |
| 939 | 12.73 | 25.2 | 37.01 | 27.94 | 27.94 | tr H0VLE0 H0VLE0_CAVPO | Uncharacterized protein OS=Cavia porcellus<br>GN=SYNCRIP PE=4 SV=1                              | CAVPO | 13 |
| 940 | 12.71 | 12.8 | 35.5  | 35.5  | 27.36 | tr H0V679 H0V679_CAVPO | Uncharacterized protein (Fragment) OS=Cavia<br>porcellus GN=PPT1 PE=4 SV=1                      | CAVPO | 8  |
| 941 | 12.68 | 12.8 | 15.54 | 8.163 | 7.3   | tr H0V6V0 H0V6V0_CAVPO | Uncharacterized protein OS=Cavia porcellus<br>GN=SIN3A PE=4 SV=1                                | CAVPO | 8  |
| 942 | 12.67 | 12.8 | 40.62 | 35.38 | 30.46 | tr H0VKG2 H0VKG2_CAVPO | Uncharacterized protein (Fragment) OS=Cavia<br>porcellus GN=EIF3I PE=3 SV=1                     | CAVPO | 9  |
| 943 | 12.65 | 13   | 18.34 | 12.43 | 6.437 | tr H0V4K2 H0V4K2_CAVPO | Uncharacterized protein OS=Cavia porcellus<br>GN=VCL PE=4 SV=1                                  | CAVPO | 6  |
| 944 | 12.65 | 12.7 | 32.06 | 26.65 | 21.64 | tr H0W2I6 H0W2I6_CAVPO | Serine/threonine-protein phosphatase<br>OS=Cavia porcellus GN=PPP5C PE=3 SV=1                   | CAVPO | 8  |
| 945 | 12.64 | 12.8 | 18.84 | 16.43 | 12.46 | tr H0VEI9 H0VEI9_CAVPO | Uncharacterized protein (Fragment) OS=Cavia<br>porcellus GN=KIF2A PE=4 SV=1                     | CAVPO | 7  |
| 946 | 12.61 | 13.1 | 25.71 | 19.28 | 13.01 | tr H0V9L6 H0V9L6_CAVPO | Uncharacterized protein (Fragment) OS=Cavia<br>porcellus GN=SCFD1 PE=4 SV=1                     | CAVPO | 6  |
| 947 | 12.61 | 12.7 | 37.65 | 37.65 | 30.2  | tr Q0QEZ1 Q0QEZ1_CAVPO | Succinate dehydrogenase complex subunit B<br>(Fragment) OS=Cavia porcellus GN=SDHB<br>PE=2 SV=1 | CAVPO | 7  |
| 948 | 12.6  | 12.7 | 29.69 | 29.69 | 29.69 | tr H0V3E6 H0V3E6_CAVPO | Uncharacterized protein (Fragment) OS=Cavia                                                     | CAVPO | 8  |

|     |       |      |       |       |       |                        |                                                                             |       |    |
|-----|-------|------|-------|-------|-------|------------------------|-----------------------------------------------------------------------------|-------|----|
|     |       |      |       |       |       |                        | porcellus GN=GBAS PE=4 SV=1                                                 |       |    |
| 949 | 12.58 | 12.7 | 17.19 | 15.44 | 10.53 | tr H0VAW7 H0VAW7_CAVPO | Uncharacterized protein (Fragment) OS=Cavia porcellus GN=SLC1A2 PE=4 SV=1   | CAVPO | 8  |
| 950 | 12.57 | 12.7 | 86.96 | 86.96 | 83.48 | tr H0VNX3 H0VNX3_CAVPO | Uncharacterized protein OS=Cavia porcellus GN=Mif PE=4 SV=1                 | CAVPO | 19 |
| 951 | 12.56 | 12.7 | 56.25 | 52.34 | 52.34 | tr H0UTQ8 H0UTQ8_CAVPO | Uncharacterized protein OS=Cavia porcellus GN=Uba52 PE=4 SV=1               | CAVPO | 15 |
| 952 | 12.56 | 12.6 | 48.71 | 48.71 | 47.41 | tr H0V323 H0V323_CAVPO | Uncharacterized protein (Fragment) OS=Cavia porcellus GN=PAFAH1B3 PE=4 SV=1 | CAVPO | 7  |
| 953 | 12.53 | 12.8 | 23.46 | 11.61 | 9.674 | tr H0VI01 H0VI01_CAVPO | Uncharacterized protein OS=Cavia porcellus GN=AP1G1 PE=4 SV=1               | CAVPO | 7  |
| 954 | 12.52 | 12.8 | 33.42 | 30.45 | 20.79 | tr H0UX08 H0UX08_CAVPO | Uncharacterized protein (Fragment) OS=Cavia porcellus GN=ARPC1A PE=4 SV=1   | CAVPO | 8  |
| 955 | 12.52 | 12.6 | 36.33 | 33.71 | 31.09 | tr H0V742 H0V742_CAVPO | Uncharacterized protein (Fragment) OS=Cavia porcellus GN=NDUFS3 PE=3 SV=1   | CAVPO | 7  |
| 956 | 12.51 | 12.6 | 35.42 | 33.54 | 25.08 | tr H0V0I3 H0V0I3_CAVPO | Annexin (Fragment) OS=Cavia porcellus GN=ANXA5 PE=3 SV=1                    | CAVPO | 7  |
| 957 | 12.51 | 14.3 | 56.52 | 49.8  | 37.94 | tr H0V268 H0V268_CAVPO | Uncharacterized protein OS=Cavia porcellus GN=CLIC4 PE=4 SV=1               | CAVPO | 10 |
| 958 | 12.5  | 13.2 | 14.9  | 9.785 | 6.079 | tr H0VCB3 H0VCB3_CAVPO | Uncharacterized protein (Fragment) OS=Cavia porcellus GN=RAB3GAP2 PE=4 SV=1 | CAVPO | 7  |
| 959 | 12.5  | 12.7 | 28.46 | 21.05 | 16.57 | tr H0VIU6 H0VIU6_CAVPO | Uncharacterized protein OS=Cavia porcellus GN=PPM1H PE=4 SV=1               | CAVPO | 7  |
| 960 | 12.48 | 12.7 | 36.21 | 31.03 | 18.23 | tr H0UX53 H0UX53_CAVPO | Uncharacterized protein OS=Cavia porcellus GN=PCYT2 PE=4 SV=1               | CAVPO | 7  |
| 961 | 12.47 | 12.7 | 22.06 | 18.48 | 12.61 | tr H0VAT4 H0VAT4_CAVPO | Uncharacterized protein OS=Cavia porcellus GN=APPL1 PE=4 SV=1               | CAVPO | 7  |

|     |       |      |       |       |       |                        |                                                                                 |       |    |
|-----|-------|------|-------|-------|-------|------------------------|---------------------------------------------------------------------------------|-------|----|
| 962 | 12.46 | 12.6 | 41.8  | 36.07 | 33.61 | tr H0VJ37 H0VJ37_CAVPO | Uncharacterized protein (Fragment) OS=Cavia porcellus GN=LMAN1 PE=4 SV=1        | CAVPO | 13 |
| 963 | 12.46 | 12.8 | 26.27 | 22.73 | 13.98 | tr H0VJC0 H0VJC0_CAVPO | Uncharacterized protein OS=Cavia porcellus GN=CPT2 PE=3 SV=1                    | CAVPO | 7  |
| 964 | 12.45 | 12.5 | 32.81 | 29.69 | 25.62 | tr H0VVS6 H0VVS6_CAVPO | Uncharacterized protein (Fragment) OS=Cavia porcellus GN=PGP PE=4 SV=1          | CAVPO | 6  |
| 965 | 12.43 | 12.5 | 47.72 | 43.57 | 41.08 | tr H0UVM8 H0UVM8_CAVPO | Proteasome subunit beta type OS=Cavia porcellus GN=PSMB1 PE=3 SV=1              | CAVPO | 7  |
| 966 | 12.42 | 12.6 | 44.05 | 44.05 | 38.33 | tr H0V6U7 H0V6U7_CAVPO | Uncharacterized protein OS=Cavia porcellus GN=SPAG7 PE=4 SV=1                   | CAVPO | 7  |
| 967 | 12.39 | 12.5 | 8.524 | 6.346 | 5.295 | tr H0UXB9 H0UXB9_CAVPO | Uncharacterized protein OS=Cavia porcellus GN=PRRC2C PE=4 SV=1                  | CAVPO | 8  |
| 968 | 12.38 | 12.5 | 36.87 | 18.84 | 15.83 | tr H0VJC1 H0VJC1_CAVPO | Uncharacterized protein OS=Cavia porcellus GN=PRPF31 PE=4 SV=1                  | CAVPO | 6  |
| 969 | 12.38 | 12.5 | 36.06 | 36.06 | 32.96 | tr H0VZD0 H0VZD0_CAVPO | Uncharacterized protein OS=Cavia porcellus GN=G6PC2 PE=4 SV=1                   | CAVPO | 11 |
| 970 | 12.37 | 12.8 | 32.02 | 28.48 | 16.42 | tr H0VPJ5 H0VPJ5_CAVPO | Aldehyde dehydrogenase OS=Cavia porcellus GN=ALDH3A2 PE=3 SV=1                  | CAVPO | 7  |
| 971 | 12.37 | 12.5 | 61.86 | 61.86 | 55.93 | tr H0W8B0 H0W8B0_CAVPO | Uncharacterized protein (Fragment) OS=Cavia porcellus GN=Snrpd2 PE=4 SV=1       | CAVPO | 9  |
| 972 | 12.36 | 12.4 | 30.39 | 26.47 | 22.55 | tr H0W3C2 H0W3C2_CAVPO | Aminoacylase-1 OS=Cavia porcellus GN=ACY1 PE=3 SV=1                             | CAVPO | 7  |
| 973 | 12.35 | 12.4 | 20    | 18.92 | 16.77 | tr H0VX80 H0VX80_CAVPO | Uncharacterized protein OS=Cavia porcellus GN=SLC16A3 PE=4 SV=1                 | CAVPO | 8  |
| 974 | 12.33 | 12.6 | 38.76 | 30.86 | 23.21 | tr H0V217 H0V217_CAVPO | Uncharacterized protein OS=Cavia porcellus GN=PSMC4 PE=3 SV=1                   | CAVPO | 7  |
| 975 | 12.33 | 12.4 | 52.59 | 35.34 | 28.02 | tr H0VT21 H0VT21_CAVPO | Small nuclear ribonucleoprotein-associated protein OS=Cavia porcellus PE=3 SV=1 | CAVPO | 8  |

|     |       |      |       |       |       |                        |                                                                               |       |    |
|-----|-------|------|-------|-------|-------|------------------------|-------------------------------------------------------------------------------|-------|----|
| 976 | 12.31 | 12.6 | 24.06 | 14.23 | 9.702 | tr H0V9U8 H0V9U8_CAVPO | Uncharacterized protein OS=Cavia porcellus<br>GN=PANK4 PE=4 SV=1              | CAVPO | 6  |
| 977 | 12.3  | 12.7 | 29.04 | 29.04 | 29.04 | tr H0V063 H0V063_CAVPO | Uncharacterized protein OS=Cavia porcellus<br>GN=CRKL PE=4 SV=1               | CAVPO | 8  |
| 978 | 12.28 | 23.3 | 66.67 | 62.83 | 49.85 | tr H0V1D4 H0V1D4_CAVPO | Uncharacterized protein OS=Cavia porcellus<br>GN=PCBP3 PE=4 SV=1              | CAVPO | 14 |
| 979 | 12.28 | 12.5 | 36.46 | 29.64 | 23.03 | tr H0V4W8 H0V4W8_CAVPO | Uncharacterized protein OS=Cavia porcellus<br>GN=SAMM50 PE=4 SV=1             | CAVPO | 7  |
| 980 | 12.23 | 14.4 | 43.82 | 43.46 | 32.51 | tr H0VH21 H0VH21_CAVPO | Uncharacterized protein OS=Cavia porcellus<br>GN=VDAC3 PE=4 SV=1              | CAVPO | 9  |
| 981 | 12.22 | 14.4 | 20.57 | 18.53 | 18.33 | tr H0VIV2 H0VIV2_CAVPO | Uncharacterized protein (Fragment) OS=Cavia<br>porcellus GN=Slc2a3 PE=3 SV=1  | CAVPO | 8  |
| 982 | 12.18 | 12.4 | 37.55 | 37.55 | 28.82 | tr H0V6B5 H0V6B5_CAVPO | Uncharacterized protein OS=Cavia porcellus<br>GN=CLTB PE=4 SV=1               | CAVPO | 9  |
| 983 | 12.16 | 12.3 | 23.24 | 20.23 | 18.56 | tr H0W2A0 H0W2A0_CAVPO | Transporter OS=Cavia porcellus GN=SLC6A1<br>PE=3 SV=1                         | CAVPO | 11 |
| 984 | 12.13 | 12.2 | 20.92 | 19.08 | 18.9  | tr H0V2W8 H0V2W8_CAVPO | Uncharacterized protein (Fragment) OS=Cavia<br>porcellus GN=SLC1A5 PE=4 SV=1  | CAVPO | 10 |
| 985 | 12.12 | 12.2 | 34.11 | 31.4  | 31.4  | tr H0VQL2 H0VQL2_CAVPO | Uncharacterized protein (Fragment) OS=Cavia<br>porcellus GN=ATP1B2 PE=3 SV=1  | CAVPO | 11 |
| 986 | 12.11 | 12.3 | 22.71 | 18.19 | 15.51 | tr H0UU14 H0UU14_CAVPO | Uncharacterized protein OS=Cavia porcellus<br>GN=SSRP1 PE=4 SV=1              | CAVPO | 8  |
| 987 | 12.1  | 12.2 | 18.01 | 18.01 | 16.86 | tr H0VU17 H0VU17_CAVPO | Uncharacterized protein (Fragment) OS=Cavia<br>porcellus GN=CAPRIN1 PE=4 SV=1 | CAVPO | 9  |
| 988 | 12.09 | 12.1 | 65.15 | 52.53 | 52.53 | tr H0V9U0 H0V9U0_CAVPO | Uncharacterized protein OS=Cavia porcellus<br>GN=CDKN1B PE=4 SV=1             | CAVPO | 7  |
| 989 | 12.09 | 12.2 | 63.45 | 48.97 | 48.97 | tr H0VQZ0 H0VQZ0_CAVPO | Uncharacterized protein OS=Cavia porcellus<br>GN=UBE2V2 PE=4 SV=1             | CAVPO | 11 |



|      |       |      |       |       |       |                        |                                                                               |       |    |
|------|-------|------|-------|-------|-------|------------------------|-------------------------------------------------------------------------------|-------|----|
| 990  | 12.07 | 12.1 | 59.18 | 54.42 | 54.42 | tr H0UWE7 H0UWE7_CAVPO | Uncharacterized protein OS=Cavia porcellus<br>GN=LOC100720944 PE=3 SV=1       | CAVPO | 7  |
| 991  | 12.06 | 12.1 | 56.25 | 47.16 | 47.16 | tr H0VJN3 H0VJN3_CAVPO | Uncharacterized protein OS=Cavia porcellus<br>GN=NDUFB10 PE=4 SV=1            | CAVPO | 6  |
| 992  | 12.05 | 14.3 | 51.02 | 37.25 | 26.64 | tr H0UYJ4 H0UYJ4_CAVPO | Uncharacterized protein (Fragment) OS=Cavia<br>porcellus GN=PSMC1 PE=3 SV=1   | CAVPO | 8  |
| 993  | 12.04 | 12.1 | 21.62 | 15.58 | 15.58 | tr H0VES1 H0VES1_CAVPO | Uncharacterized protein (Fragment) OS=Cavia<br>porcellus GN=Ewsr1 PE=4 SV=1   | CAVPO | 10 |
| 994  | 12.03 | 12.1 | 56.22 | 42.49 | 42.49 | tr H0VLQ7 H0VLQ7_CAVPO | Uncharacterized protein OS=Cavia porcellus<br>GN=MSRA PE=3 SV=1               | CAVPO | 6  |
| 995  | 12.02 | 12.2 | 27.33 | 25.06 | 19.13 | tr H0VMU7 H0VMU7_CAVPO | Uncharacterized protein OS=Cavia porcellus<br>GN=ARHGAP1 PE=4 SV=1            | CAVPO | 7  |
| 996  | 12    | 12   | 31.25 | 31.25 | 31.25 | tr H0VFW6 H0VFW6_CAVPO | Uncharacterized protein (Fragment) OS=Cavia<br>porcellus GN=LASP1 PE=4 SV=1   | CAVPO | 8  |
| 997  | 11.98 | 12.3 | 27.45 | 14.67 | 9.511 | tr H0V2Y9 H0V2Y9_CAVPO | Uncharacterized protein OS=Cavia porcellus<br>GN=GYS1 PE=4 SV=1               | CAVPO | 6  |
| 998  | 11.98 | 12.1 | 15.91 | 10.83 | 10.06 | tr H0V481 H0V481_CAVPO | Uncharacterized protein (Fragment) OS=Cavia<br>porcellus GN=SORBS2 PE=4 SV=1  | CAVPO | 7  |
| 999  | 11.96 | 12.2 | 31.65 | 23.84 | 20.25 | tr H0V6Y2 H0V6Y2_CAVPO | Uncharacterized protein OS=Cavia porcellus<br>GN=ATXN10 PE=4 SV=1             | CAVPO | 7  |
| 1000 | 11.95 | 12   | 42.41 | 42.41 | 32.28 | tr H0VGV8 H0VGV8_CAVPO | Uncharacterized protein OS=Cavia porcellus<br>GN=UBE2I PE=3 SV=1              | CAVPO | 6  |
| 1001 | 11.92 | 15.1 | 61.97 | 56.69 | 50.7  | tr H0VR94 H0VR94_CAVPO | Uncharacterized protein (Fragment) OS=Cavia<br>porcellus GN=CAPZA1 PE=4 SV=1  | CAVPO | 8  |
| 1002 | 11.91 | 12   | 53.57 | 52.55 | 48.98 | tr H0V261 H0V261_CAVPO | Uncharacterized protein (Fragment) OS=Cavia<br>porcellus GN=TXNDC12 PE=4 SV=1 | CAVPO | 6  |
| 1003 | 11.9  | 12   | 23.55 | 20.34 | 17.77 | tr H0VSX5 H0VSX5_CAVPO | Uncharacterized protein OS=Cavia porcellus<br>GN=PPP2R5E PE=4 SV=1            | CAVPO | 9  |

|      |       |      |       |       |       |                        |                                                                              |       |    |
|------|-------|------|-------|-------|-------|------------------------|------------------------------------------------------------------------------|-------|----|
| 1004 | 11.87 | 11.9 | 46.88 | 32.14 | 28.13 | tr H0UW80 H0UW80_CAVPO | Peptidyl-prolyl cis-trans isomerase OS=Cavia porcellus GN=FKBP3 PE=4 SV=1    | CAVPO | 6  |
| 1005 | 11.86 | 12   | 28.47 | 22.22 | 20.14 | tr H0VI51 H0VI51_CAVPO | Uncharacterized protein OS=Cavia porcellus GN=KIAA1715 PE=4 SV=1             | CAVPO | 6  |
| 1006 | 11.85 | 12.1 | 34.93 | 28.47 | 18.18 | tr H0VJC7 H0VJC7_CAVPO | Uncharacterized protein OS=Cavia porcellus GN=BZW2 PE=4 SV=1                 | CAVPO | 7  |
| 1007 | 11.81 | 11.9 | 59.02 | 56.59 | 56.59 | tr H0UZS2 H0UZS2_CAVPO | Uncharacterized protein OS=Cavia porcellus GN=Ranbp1 PE=4 SV=1               | CAVPO | 8  |
| 1008 | 11.81 | 12   | 42.43 | 37.47 | 24.57 | tr H0VRE0 H0VRE0_CAVPO | Uncharacterized protein OS=Cavia porcellus GN=Sec14l2 PE=4 SV=1              | CAVPO | 7  |
| 1009 | 11.8  | 12   | 42.41 | 39.29 | 39.29 | tr H0V1S2 H0V1S2_CAVPO | Uncharacterized protein OS=Cavia porcellus GN=CHMP4B PE=4 SV=1               | CAVPO | 7  |
| 1010 | 11.8  | 12   | 35.56 | 27.92 | 24.58 | tr H0VGI9 H0VGI9_CAVPO | Uncharacterized protein OS=Cavia porcellus GN=SCRN3 PE=4 SV=1                | CAVPO | 7  |
| 1011 | 11.78 | 11.8 | 31.96 | 23.17 | 23.17 | tr H0WA47 H0WA47_CAVPO | Uncharacterized protein OS=Cavia porcellus GN=Dhrs7 PE=3 SV=1                | CAVPO | 6  |
| 1012 | 11.78 | 11.8 | 58.55 | 53.29 | 47.37 | tr Q53YS8 Q53YS8_CAVPO | Superoxide dismutase [Cu-Zn] (Fragment) OS=Cavia porcellus GN=SOD1 PE=2 SV=1 | Cu-Zn | 12 |
| 1013 | 11.77 | 11.9 | 42.13 | 37.01 | 27.17 | tr H0VLP7 H0VLP7_CAVPO | Uncharacterized protein OS=Cavia porcellus GN=PSME3 PE=4 SV=1                | CAVPO | 6  |
| 1014 | 11.76 | 11.9 | 24.8  | 24.64 | 15.46 | tr H0UWQ1 H0UWQ1_CAVPO | Uncharacterized protein OS=Cavia porcellus GN=IRGQ PE=4 SV=1                 | CAVPO | 6  |
| 1015 | 11.76 | 11.9 | 24.27 | 24.04 | 24.04 | tr H0W5Z3 H0W5Z3_CAVPO | Uncharacterized protein OS=Cavia porcellus GN=NDUFV3 PE=4 SV=1               | CAVPO | 8  |
| 1016 | 11.75 | 11.8 | 44.74 | 38.82 | 38.82 | tr H0W478 H0W478_CAVPO | Uncharacterized protein (Fragment) OS=Cavia porcellus GN=RPS18 PE=3 SV=1     | CAVPO | 8  |
| 1017 | 11.74 | 11.9 | 28.18 | 22.31 | 13.03 | tr H0VUX9 H0VUX9_CAVPO | Uncharacterized protein OS=Cavia porcellus GN=LOC100713897 PE=4 SV=1         | CAVPO | 6  |

|      |       |      |       |       |       |                        |                                                                                        |       |    |
|------|-------|------|-------|-------|-------|------------------------|----------------------------------------------------------------------------------------|-------|----|
| 1018 | 11.74 | 11.8 | 52.07 | 51.61 | 51.61 | tr H0W2B1 H0W2B1_CAVPO | Superoxide dismutase (Fragment) OS=Cavia porcellus GN=SOD2 PE=3 SV=1                   | CAVPO | 11 |
| 1019 | 11.73 | 11.8 | 46.86 | 32.57 | 29.14 | tr H0UVL7 H0UVL7_CAVPO | Uncharacterized protein OS=Cavia porcellus GN=STRAP PE=4 SV=1                          | CAVPO | 7  |
| 1020 | 11.71 | 11.8 | 46.51 | 45.58 | 42.79 | tr H0W9T2 H0W9T2_CAVPO | Uncharacterized protein OS=Cavia porcellus GN=LOC100727822 PE=4 SV=1                   | CAVPO | 8  |
| 1021 | 11.7  | 20.6 | 43.24 | 41.16 | 32.64 | tr H0VAT3 H0VAT3_CAVPO | Histone deacetylase OS=Cavia porcellus GN=HDAC1 PE=3 SV=1                              | CAVPO | 12 |
| 1022 | 11.69 | 11.9 | 12.63 | 8.37  | 6.167 | tr H0V7U3 H0V7U3_CAVPO | Ubiquitin carboxyl-terminal hydrolase (Fragment) OS=Cavia porcellus GN=USP47 PE=3 SV=1 | CAVPO | 6  |
| 1023 | 11.68 | 11.9 | 20.79 | 20.32 | 11.75 | tr H0VDW5 H0VDW5_CAVPO | Signal recognition particle subunit SRP68 OS=Cavia porcellus GN=SRP68 PE=3 SV=1        | CAVPO | 6  |
| 1024 | 11.67 | 13.1 | 62.67 | 62    | 61.33 | tr H0WA91 H0WA91_CAVPO | Uncharacterized protein OS=Cavia porcellus GN=COX5A PE=4 SV=1                          | CAVPO | 10 |
| 1025 | 11.66 | 23.9 | 34.65 | 24.64 | 22.22 | tr H0VHU1 H0VHU1_CAVPO | Uncharacterized protein OS=Cavia porcellus GN=DLG1 PE=4 SV=1                           | CAVPO | 16 |
| 1026 | 11.66 | 11.9 | 29.64 | 22.31 | 9.581 | tr H0VQP4 H0VQP4_CAVPO | Uncharacterized protein OS=Cavia porcellus GN=MTA2 PE=4 SV=1                           | CAVPO | 7  |
| 1027 | 11.65 | 11.9 | 57.89 | 54.39 | 51.46 | tr H0V3N6 H0V3N6_CAVPO | Uncharacterized protein OS=Cavia porcellus GN=LOC100714659 PE=4 SV=1                   | CAVPO | 7  |
| 1028 | 11.65 | 12   | 46.2  | 42.69 | 26.02 | tr H0WAR7 H0WAR7_CAVPO | Uncharacterized protein OS=Cavia porcellus GN=WDR77 PE=4 SV=1                          | CAVPO | 6  |
| 1029 | 11.64 | 11.7 | 48.61 | 48.21 | 38.25 | tr H0VZF2 H0VZF2_CAVPO | Uncharacterized protein OS=Cavia porcellus GN=PGLS PE=4 SV=1                           | CAVPO | 7  |
| 1030 | 11.61 | 11.8 | 27.64 | 24.39 | 15.45 | tr H0V646 H0V646_CAVPO | Uncharacterized protein (Fragment) OS=Cavia porcellus GN=ADSL PE=4 SV=1                | CAVPO | 6  |
| 1031 | 11.61 | 11.7 | 79.29 | 52.86 | 52.86 | tr H0VN18 H0VN18_CAVPO | Profilin OS=Cavia porcellus GN=PFN1 PE=3                                               | CAVPO | 7  |

|      |       |      |       |       |       |                        |                                                                                            |       |    |
|------|-------|------|-------|-------|-------|------------------------|--------------------------------------------------------------------------------------------|-------|----|
|      |       |      |       |       |       |                        | SV=1                                                                                       |       |    |
| 1032 | 11.58 | 11.7 | 25.37 | 25.37 | 19.45 | tr H0UY00 H0UY00_CAVPO | Uncharacterized protein (Fragment) OS=Cavia porcellus GN=ENDOD1 PE=4 SV=1                  | CAVPO | 6  |
| 1033 | 11.57 | 12.2 | 33.94 | 29.07 | 13.62 | tr H0UX84 H0UX84_CAVPO | Uncharacterized protein (Fragment) OS=Cavia porcellus GN=GPS1 PE=4 SV=1                    | CAVPO | 5  |
| 1034 | 11.57 | 11.7 | 49.74 | 28.57 | 21.68 | tr H0V5Q3 H0V5Q3_CAVPO | Uncharacterized protein OS=Cavia porcellus GN=SEPHS1 PE=4 SV=1                             | CAVPO | 6  |
| 1035 | 11.57 | 11.8 | 38.19 | 38.19 | 33.33 | tr H0VK45 H0VK45_CAVPO | Uncharacterized protein OS=Cavia porcellus GN=SNX12 PE=4 SV=1                              | CAVPO | 7  |
| 1036 | 11.55 | 11.7 | 25.3  | 21.15 | 21.15 | tr H0VYL1 H0VYL1_CAVPO | Uncharacterized protein OS=Cavia porcellus GN=NUP62 PE=4 SV=1                              | CAVPO | 7  |
| 1037 | 11.52 | 11.6 | 50.48 | 46.19 | 46.19 | tr H0V0R2 H0V0R2_CAVPO | Uncharacterized protein OS=Cavia porcellus GN=ABHD14B PE=4 SV=1                            | CAVPO | 7  |
| 1038 | 11.51 | 11.7 | 44.54 | 29.89 | 27.87 | tr H0WA55 H0WA55_CAVPO | Uncharacterized protein OS=Cavia porcellus GN=TBCC PE=4 SV=1                               | CAVPO | 7  |
| 1039 | 11.49 | 11.6 | 61.44 | 50.85 | 47.03 | tr H0W641 H0W641_CAVPO | Uncharacterized protein OS=Cavia porcellus GN=LOC100732059 PE=3 SV=1                       | CAVPO | 10 |
| 1040 | 11.48 | 18.7 | 42.86 | 35.99 | 28.94 | tr H0V888 H0V888_CAVPO | Uncharacterized protein (Fragment) OS=Cavia porcellus GN=CAMK2A PE=4 SV=1                  | CAVPO | 14 |
| 1041 | 11.48 | 11.6 | 30.84 | 22.75 | 18.86 | tr H0VAZ0 H0VAZ0_CAVPO | Zinc finger Ran-binding domain-containing protein 2 OS=Cavia porcellus GN=ZRANB2 PE=3 SV=1 | CAVPO | 7  |
| 1042 | 11.45 | 13.3 | 38.81 | 36.57 | 36.57 | tr H0VPW7 H0VPW7_CAVPO | Uncharacterized protein OS=Cavia porcellus GN=ANP32E PE=4 SV=1                             | CAVPO | 11 |
| 1043 | 11.44 | 11.9 | 6.314 | 3.886 | 2.105 | tr H0VJ41 H0VJ41_CAVPO | Uncharacterized protein (Fragment) OS=Cavia porcellus GN=BSN PE=4 SV=1                     | CAVPO | 6  |
| 1044 | 11.43 | 12.2 | 18.97 | 13.11 | 9.953 | tr H0V141 H0V141_CAVPO | Uncharacterized protein (Fragment) OS=Cavia porcellus GN=TNPO1 PE=4 SV=1                   | CAVPO | 8  |

|      |       |      |       |       |       |                        |                                                                                            |       |    |
|------|-------|------|-------|-------|-------|------------------------|--------------------------------------------------------------------------------------------|-------|----|
| 1045 | 11.43 | 15.6 | 32.53 | 29.76 | 24.22 | tr H0VTS7 H0VTS7_CAVPO | Uncharacterized protein (Fragment) OS=Cavia porcellus GN=HNRNPDL PE=4 SV=1                 | CAVPO | 10 |
| 1046 | 11.42 | 12.8 | 41.62 | 38.38 | 28.65 | tr H0VPG3 H0VPG3_CAVPO | Phosphoserine aminotransferase OS=Cavia porcellus GN=Psat1 PE=3 SV=1                       | CAVPO | 9  |
| 1047 | 11.42 | 11.5 | 29.55 | 24.72 | 21.31 | tr H0VT69 H0VT69_CAVPO | Eukaryotic translation initiation factor 3 subunit H OS=Cavia porcellus GN=EIF3H PE=3 SV=1 | CAVPO | 6  |
| 1048 | 11.4  | 11.5 | 35.1  | 26.43 | 21.78 | tr H0V880 H0V880_CAVPO | Uncharacterized protein (Fragment) OS=Cavia porcellus GN=G3bp1 PE=4 SV=1                   | CAVPO | 10 |
| 1049 | 11.4  | 11.7 | 31.05 | 29.34 | 25.36 | tr H0VLT4 H0VLT4_CAVPO | Uncharacterized protein OS=Cavia porcellus GN=TMOD2 PE=4 SV=1                              | CAVPO | 7  |
| 1050 | 11.4  | 11.7 | 17.35 | 14.78 | 11.18 | tr H0W8M9 H0W8M9_CAVPO | Uncharacterized protein OS=Cavia porcellus GN=HGS PE=4 SV=1                                | CAVPO | 9  |
| 1051 | 11.38 | 11.5 | 31.61 | 30.97 | 30.97 | tr H0V643 H0V643_CAVPO | Uncharacterized protein OS=Cavia porcellus GN=FAM162A PE=4 SV=1                            | CAVPO | 6  |
| 1052 | 11.36 | 11.4 | 29.22 | 17.81 | 17.81 | tr H0VG23 H0VG23_CAVPO | Uncharacterized protein OS=Cavia porcellus GN=RCC1 PE=4 SV=1                               | CAVPO | 6  |
| 1053 | 11.35 | 11.5 | 22.24 | 18.82 | 16.35 | tr H0VLQ6 H0VLQ6_CAVPO | Uncharacterized protein OS=Cavia porcellus GN=CELF2 PE=4 SV=1                              | CAVPO | 7  |
| 1054 | 11.35 | 11.4 | 38.42 | 38.42 | 33.16 | tr H0W3F0 H0W3F0_CAVPO | Uncharacterized protein OS=Cavia porcellus GN=CYGB PE=3 SV=1                               | CAVPO | 6  |
| 1055 | 11.34 | 11.4 | 67.52 | 58.6  | 58.6  | tr H0W575 H0W575_CAVPO | Uncharacterized protein OS=Cavia porcellus GN=PIN1 PE=4 SV=1                               | CAVPO | 8  |
| 1056 | 11.33 | 11.8 | 21.89 | 16.74 | 9.263 | tr H0VH29 H0VH29_CAVPO | Uncharacterized protein (Fragment) OS=Cavia porcellus GN=ATXN2L PE=4 SV=1                  | CAVPO | 7  |
| 1057 | 11.32 | 11.5 | 38.38 | 33.84 | 29.29 | tr H0UT84 H0UT84_CAVPO | Uncharacterized protein (Fragment) OS=Cavia porcellus GN=NUDT5 PE=3 SV=1                   | CAVPO | 6  |
| 1058 | 11.3  | 11.6 | 23.45 | 18.83 | 15.28 | tr H0UVE1 H0UVE1_CAVPO | Nicalin OS=Cavia porcellus GN=NCLN PE=3                                                    | CAVPO | 8  |

|      |       |      |       |       |       |                        |                                                                               |       |    |
|------|-------|------|-------|-------|-------|------------------------|-------------------------------------------------------------------------------|-------|----|
|      |       |      |       |       |       |                        | SV=1                                                                          |       |    |
| 1059 | 11.28 | 28.3 | 52.62 | 49.66 | 43.74 | tr H0W2C0 H0W2C0_CAVPO | Uncharacterized protein OS=Cavia porcellus<br>GN=HNRNPH2 PE=4 SV=1            | CAVPO | 19 |
| 1060 | 11.28 | 11.3 | 32.39 | 23.94 | 23.94 | tr H0WBQ6 H0WBQ6_CAVPO | Uncharacterized protein OS=Cavia porcellus<br>GN=HIST1H1C PE=3 SV=1           | CAVPO | 7  |
| 1061 | 11.26 | 13.4 | 31.87 | 28.71 | 22.14 | tr H0UTC1 H0UTC1_CAVPO | Uncharacterized protein (Fragment) OS=Cavia<br>porcellus GN=SMARCE1 PE=4 SV=1 | CAVPO | 7  |
| 1062 | 11.24 | 11.4 | 54.14 | 54.14 | 54.14 | tr H0VL42 H0VL42_CAVPO | Uncharacterized protein OS=Cavia porcellus<br>GN=FABP3 PE=3 SV=1              | CAVPO | 7  |
| 1063 | 11.24 | 11.4 | 33.33 | 29.66 | 27.22 | tr H0VLJ5 H0VLJ5_CAVPO | Uncharacterized protein (Fragment) OS=Cavia<br>porcellus GN=EIF3F PE=3 SV=1   | CAVPO | 7  |
| 1064 | 11.23 | 13.6 | 31.29 | 31.29 | 18.62 | tr H0VNJ9 H0VNJ9_CAVPO | Uncharacterized protein OS=Cavia porcellus<br>GN=Aldh2 PE=3 SV=1              | CAVPO | 9  |
| 1065 | 11.2  | 11.4 | 24.47 | 24.47 | 22.63 | tr H0VEL9 H0VEL9_CAVPO | Uncharacterized protein OS=Cavia porcellus<br>GN=AMACR PE=4 SV=1              | CAVPO | 8  |
| 1066 | 11.2  | 11.3 | 31.74 | 26.65 | 24.85 | tr H0VRU8 H0VRU8_CAVPO | Uncharacterized protein OS=Cavia porcellus<br>GN=WDR5 PE=4 SV=1               | CAVPO | 6  |
| 1067 | 11.19 | 11.2 | 35.4  | 34.07 | 34.07 | tr H0W9K3 H0W9K3_CAVPO | Uncharacterized protein (Fragment) OS=Cavia<br>porcellus GN=TMED7 PE=3 SV=1   | CAVPO | 7  |
| 1068 | 11.18 | 11.4 | 33.02 | 23.77 | 23.77 | tr H0VLQ5 H0VLQ5_CAVPO | Uncharacterized protein (Fragment) OS=Cavia<br>porcellus GN=LCMT1 PE=4 SV=1   | CAVPO | 7  |
| 1069 | 11.17 | 11.4 | 24.96 | 16.59 | 14.33 | tr H0VGU7 H0VGU7_CAVPO | Uncharacterized protein OS=Cavia porcellus<br>GN=FXR1 PE=4 SV=1               | CAVPO | 6  |
| 1070 | 11.15 | 11.4 | 42.86 | 29.5  | 27.64 | tr H0VGM4 H0VGM4_CAVPO | Uncharacterized protein OS=Cavia porcellus<br>GN=SFXN1 PE=4 SV=1              | CAVPO | 7  |
| 1071 | 11.15 | 11.5 | 14.47 | 7.294 | 5.882 | tr H0W9Y0 H0W9Y0_CAVPO | Uncharacterized protein (Fragment) OS=Cavia<br>porcellus GN=YLPM1 PE=4 SV=1   | CAVPO | 7  |

|      |       |      |       |       |       |                        |                                                                            |       |    |
|------|-------|------|-------|-------|-------|------------------------|----------------------------------------------------------------------------|-------|----|
| 1072 | 11.12 | 11.4 | 13.74 | 7.971 | 2.804 | tr H0VS44 H0VS44_CAVPO | Uncharacterized protein (Fragment) OS=Cavia porcellus GN=ARFGEF1 PE=4 SV=1 | CAVPO | 5  |
| 1073 | 11.11 | 11.3 | 28.15 | 26.27 | 21.45 | tr H0UZW6 H0UZW6_CAVPO | Uncharacterized protein (Fragment) OS=Cavia porcellus GN=CAMK1D PE=4 SV=1  | CAVPO | 6  |
| 1074 | 11.1  | 11.2 | 33.18 | 27.61 | 19.49 | tr H0V8A6 H0V8A6_CAVPO | Uncharacterized protein OS=Cavia porcellus GN=DBNL PE=4 SV=1               | CAVPO | 6  |
| 1075 | 11.08 | 13.6 | 37.69 | 23.09 | 17.43 | tr H0VYG3 H0VYG3_CAVPO | Uncharacterized protein (Fragment) OS=Cavia porcellus GN=LMNA PE=3 SV=1    | CAVPO | 7  |
| 1076 | 11.07 | 13.8 | 46.62 | 46.26 | 28.11 | tr H0V4P0 H0V4P0_CAVPO | Uncharacterized protein OS=Cavia porcellus GN=MAPRE3 PE=4 SV=1             | CAVPO | 9  |
| 1077 | 11.06 | 11.5 | 17.54 | 15.1  | 10.48 | tr H0VRP0 H0VRP0_CAVPO | Uncharacterized protein (Fragment) OS=Cavia porcellus GN=SEC24A PE=4 SV=1  | CAVPO | 6  |
| 1078 | 11.03 | 13.2 | 25.77 | 18.85 | 9.744 | tr H0W3J4 H0W3J4_CAVPO | Uncharacterized protein OS=Cavia porcellus GN=OXR1 PE=4 SV=1               | CAVPO | 7  |
| 1079 | 11.02 | 11.3 | 24.34 | 23.11 | 18.61 | tr H0VI81 H0VI81_CAVPO | Uncharacterized protein OS=Cavia porcellus GN=UBXN7 PE=4 SV=1              | CAVPO | 7  |
| 1080 | 11    | 33.4 | 26.73 | 22.2  | 16.78 | tr H0V4N9 H0V4N9_CAVPO | Calcium-transporting ATPase OS=Cavia porcellus GN=ATP2B3 PE=3 SV=1         | CAVPO | 18 |
| 1081 | 10.99 | 11.2 | 17.31 | 13.31 | 7.235 | tr H0VEN5 H0VEN5_CAVPO | Uncharacterized protein OS=Cavia porcellus GN=CDK11B PE=4 SV=1             | CAVPO | 5  |
| 1082 | 10.92 | 11   | 37.4  | 23.58 | 18.7  | tr H0VI68 H0VI68_CAVPO | Uncharacterized protein OS=Cavia porcellus GN=PRPSAP2 PE=4 SV=1            | CAVPO | 5  |
| 1083 | 10.92 | 11.2 | 37.34 | 32.74 | 21.23 | tr H0VKG4 H0VKG4_CAVPO | Uncharacterized protein OS=Cavia porcellus GN=TSG101 PE=4 SV=1             | CAVPO | 6  |
| 1084 | 10.91 | 11.2 | 23.89 | 14.03 | 8.723 | tr H0UTC6 H0UTC6_CAVPO | Uncharacterized protein OS=Cavia porcellus GN=ALDH18A1 PE=4 SV=1           | CAVPO | 6  |
| 1085 | 10.9  | 11.2 | 17.83 | 11.17 | 9.481 | tr H0UYT0 H0UYT0_CAVPO | Uncharacterized protein OS=Cavia porcellus GN=SUPT16H PE=4 SV=1            | CAVPO | 8  |

|      |       |      |       |       |       |                        |                                                                             |       |    |
|------|-------|------|-------|-------|-------|------------------------|-----------------------------------------------------------------------------|-------|----|
| 1086 | 10.9  | 11   | 34.78 | 27.64 | 25.16 | tr H0VQV1 H0VQV1_CAVPO | Uncharacterized protein (Fragment) OS=Cavia porcellus GN=RCN2 PE=4 SV=1     | CAVPO | 8  |
| 1087 | 10.88 | 11.1 | 19.71 | 9.38  | 5.336 | tr H0VU32 H0VU32_CAVPO | Uncharacterized protein (Fragment) OS=Cavia porcellus GN=ITGA2 PE=3 SV=1    | CAVPO | 6  |
| 1088 | 10.87 | 13.3 | 39.9  | 39.42 | 35.1  | tr H0UYZ9 H0UYZ9_CAVPO | Uncharacterized protein OS=Cavia porcellus GN=RAB6C PE=3 SV=1               | CAVPO | 9  |
| 1089 | 10.87 | 11   | 33.68 | 30.56 | 27.08 | tr H0VTV5 H0VTV5_CAVPO | Uncharacterized protein (Fragment) OS=Cavia porcellus GN=LSAMP PE=4 SV=1    | CAVPO | 8  |
| 1090 | 10.86 | 10.9 | 76.52 | 76.52 | 69.57 | tr H0V6G7 H0V6G7_CAVPO | Uncharacterized protein OS=Cavia porcellus GN=Rplp2 PE=3 SV=1               | CAVPO | 6  |
| 1091 | 10.84 | 11   | 27.71 | 23.29 | 19.28 | tr H0VTA5 H0VTA5_CAVPO | Uncharacterized protein (Fragment) OS=Cavia porcellus GN=DYNC1LI2 PE=4 SV=1 | CAVPO | 6  |
| 1092 | 10.82 | 10.9 | 22.4  | 18.67 | 18.67 | tr H0V2E0 H0V2E0_CAVPO | Uncharacterized protein (Fragment) OS=Cavia porcellus GN=SH3GLB2 PE=4 SV=1  | CAVPO | 7  |
| 1093 | 10.82 | 11   | 36.31 | 31.85 | 31.21 | tr H0W551 H0W551_CAVPO | Uncharacterized protein (Fragment) OS=Cavia porcellus GN=RPS19 PE=4 SV=1    | CAVPO | 6  |
| 1094 | 10.81 | 10.9 | 53.16 | 41.14 | 41.14 | tr H0V264 H0V264_CAVPO | Uncharacterized protein OS=Cavia porcellus GN=BTF3L4 PE=4 SV=1              | CAVPO | 6  |
| 1095 | 10.81 | 11   | 35.56 | 32.59 | 22.59 | tr H0V363 H0V363_CAVPO | Uncharacterized protein OS=Cavia porcellus GN=COMT PE=4 SV=1                | CAVPO | 6  |
| 1096 | 10.8  | 10.9 | 49.32 | 32.19 | 23.63 | tr H0UUH8 H0UUH8_CAVPO | Uncharacterized protein (Fragment) OS=Cavia porcellus GN=Rpl5 PE=3 SV=1     | CAVPO | 5  |
| 1097 | 10.8  | 11.4 | 23.17 | 20.68 | 18.18 | tr H0VAR5 H0VAR5_CAVPO | Uncharacterized protein OS=Cavia porcellus GN=KRT1 PE=3 SV=1                | CAVPO | 11 |
| 1098 | 10.79 | 10.9 | 20.27 | 14.7  | 11.49 | tr H0WCN4 H0WCN4_CAVPO | Uncharacterized protein OS=Cavia porcellus GN=IGSF8 PE=4 SV=1               | CAVPO | 5  |
| 1099 | 10.77 | 11   | 16.07 | 11.9  | 10.83 | tr H0VUZ6 H0VUZ6_CAVPO | Uncharacterized protein OS=Cavia porcellus GN=MAP6 PE=4 SV=1                | CAVPO | 7  |



|      |       |      |       |       |       |                        |                                                                                      |       |   |
|------|-------|------|-------|-------|-------|------------------------|--------------------------------------------------------------------------------------|-------|---|
| 1100 | 10.76 | 10.9 | 19.01 | 17.84 | 10.8  | tr H0W3W0 H0W3W0_CAVPO | Uncharacterized protein OS=Cavia porcellus<br>GN=KCNB1 PE=4 SV=1                     | CAVPO | 6 |
| 1101 | 10.73 | 10.8 | 22.9  | 21.14 | 14.48 | tr H0W3S4 H0W3S4_CAVPO | Uncharacterized protein (Fragment) OS=Cavia<br>porcellus PE=4 SV=1                   | CAVPO | 6 |
| 1102 | 10.7  | 13.2 | 14.88 | 12.24 | 5.194 | tr H0V8S9 H0V8S9_CAVPO | Phosphoinositide phospholipase C (Fragment)<br>OS=Cavia porcellus GN=PLCB1 PE=4 SV=1 | CAVPO | 5 |
| 1103 | 10.66 | 10.7 | 49.32 | 38.36 | 38.36 | tr H0VHP7 H0VHP7_CAVPO | Uncharacterized protein (Fragment) OS=Cavia<br>porcellus GN=Csnk2b PE=4 SV=1         | CAVPO | 7 |
| 1104 | 10.66 | 10.7 | 27.04 | 18.02 | 18.02 | tr H0VSX9 H0VSX9_CAVPO | Uncharacterized protein OS=Cavia porcellus<br>GN=CSTF2 PE=4 SV=1                     | CAVPO | 6 |
| 1105 | 10.66 | 10.7 | 23.1  | 17.52 | 11.78 | tr H0W6N5 H0W6N5_CAVPO | Uncharacterized protein (Fragment) OS=Cavia<br>porcellus GN=SF1 PE=4 SV=1            | CAVPO | 5 |
| 1106 | 10.64 | 10.7 | 49.29 | 48.57 | 47.14 | tr H0VPZ2 H0VPZ2_CAVPO | Uncharacterized protein OS=Cavia porcellus<br>GN=SNCA PE=4 SV=1                      | CAVPO | 6 |
| 1107 | 10.63 | 10.7 | 26.75 | 26.75 | 21.93 | tr H0VA74 H0VA74_CAVPO | Uncharacterized protein OS=Cavia porcellus<br>GN=TSN PE=4 SV=1                       | CAVPO | 5 |
| 1108 | 10.63 | 10.9 | 31.9  | 11.33 | 6.901 | tr H0VDS9 H0VDS9_CAVPO | Uncharacterized protein OS=Cavia porcellus<br>GN=TOP1 PE=4 SV=1                      | CAVPO | 5 |
| 1109 | 10.62 | 10.8 | 36.07 | 29.03 | 11.73 | tr H0VIW0 H0VIW0_CAVPO | Uncharacterized protein OS=Cavia porcellus<br>GN=CAB39 PE=4 SV=1                     | CAVPO | 4 |
| 1110 | 10.61 | 10.7 | 33.14 | 30.29 | 23.14 | tr H0W311 H0W311_CAVPO | Uncharacterized protein OS=Cavia porcellus<br>GN=Ptgr2 PE=4 SV=1                     | CAVPO | 5 |
| 1111 | 10.58 | 10.8 | 37.66 | 33.67 | 28.18 | tr H0VRS1 H0VRS1_CAVPO | Uncharacterized protein OS=Cavia porcellus<br>GN=TFG PE=4 SV=1                       | CAVPO | 8 |
| 1112 | 10.58 | 10.7 | 15.42 | 12.11 | 9.51  | tr H0W4A1 H0W4A1_CAVPO | Uncharacterized protein OS=Cavia porcellus<br>GN=SLTM PE=4 SV=1                      | CAVPO | 7 |
| 1113 | 10.55 | 10.6 | 62.21 | 62.21 | 62.21 | tr B0FJL6 B0FJL6_CAVPO | TPT1 OS=Cavia porcellus GN=TPT1 PE=2<br>SV=1                                         | CAVPO | 6 |

|      |       |      |       |       |       |                        |                                                                               |       |    |
|------|-------|------|-------|-------|-------|------------------------|-------------------------------------------------------------------------------|-------|----|
| 1114 | 10.54 | 10.7 | 14.9  | 10.17 | 10.17 | tr H0UUS2 H0UUS2_CAVPO | Uncharacterized protein OS=Cavia porcellus<br>GN=EMC1 PE=4 SV=1               | CAVPO | 7  |
| 1115 | 10.54 | 10.8 | 33.95 | 32.41 | 32.41 | tr H0VXV1 H0VXV1_CAVPO | Uncharacterized protein (Fragment) OS=Cavia<br>porcellus GN=COPS6 PE=4 SV=1   | CAVPO | 8  |
| 1116 | 10.53 | 10.7 | 29.75 | 23.27 | 17.23 | tr H0VUQ4 H0VUQ4_CAVPO | Uncharacterized protein OS=Cavia porcellus<br>GN=BAG5 PE=4 SV=1               | CAVPO | 6  |
| 1117 | 10.5  | 10.6 | 42.94 | 41.1  | 26.38 | tr H0VC16 H0VC16_CAVPO | Uncharacterized protein (Fragment) OS=Cavia<br>porcellus GN=PPP2R4 PE=4 SV=1  | CAVPO | 7  |
| 1118 | 10.5  | 10.7 | 33.24 | 33.24 | 27.35 | tr H0VDW9 H0VDW9_CAVPO | Uncharacterized protein OS=Cavia porcellus<br>GN=CTSB PE=3 SV=1               | CAVPO | 7  |
| 1119 | 10.49 | 19.2 | 67.21 | 60.32 | 56.28 | tr H0VG97 H0VG97_CAVPO | Uncharacterized protein OS=Cavia porcellus<br>GN=YWHAG PE=3 SV=1              | CAVPO | 14 |
| 1120 | 10.48 | 10.7 | 16.86 | 10.74 | 8.056 | tr H0UZQ1 H0UZQ1_CAVPO | Uncharacterized protein OS=Cavia porcellus<br>GN=RBM10 PE=4 SV=1              | CAVPO | 7  |
| 1121 | 10.48 | 10.9 | 14.11 | 9.809 | 7.656 | tr H0VGW0 H0VGW0_CAVPO | Uncharacterized protein OS=Cavia porcellus<br>GN=SYMPK PE=4 SV=1              | CAVPO | 7  |
| 1122 | 10.47 | 10.5 | 53.13 | 53.13 | 53.13 | tr H0UVI6 H0UVI6_CAVPO | Uncharacterized protein (Fragment) OS=Cavia<br>porcellus GN=PFDN5 PE=3 SV=1   | CAVPO | 6  |
| 1123 | 10.46 | 10.6 | 56.45 | 56.45 | 40.86 | tr H0V587 H0V587_CAVPO | Uncharacterized protein OS=Cavia porcellus<br>GN=ARL6 PE=3 SV=1               | CAVPO | 6  |
| 1124 | 10.44 | 10.5 | 28.26 | 17.94 | 17.94 | tr H0VEY6 H0VEY6_CAVPO | Uncharacterized protein OS=Cavia porcellus<br>GN=ADRM1 PE=4 SV=1              | CAVPO | 7  |
| 1125 | 10.43 | 10.7 | 37.79 | 37.79 | 31.27 | tr H0V3T3 H0V3T3_CAVPO | Uncharacterized protein OS=Cavia porcellus<br>GN=VTA1 PE=4 SV=1               | CAVPO | 8  |
| 1126 | 10.42 | 10.5 | 20.98 | 20.98 | 20.98 | tr H0UXN5 H0UXN5_CAVPO | Uncharacterized protein OS=Cavia porcellus<br>GN=ECI1 PE=3 SV=1               | CAVPO | 6  |
| 1127 | 10.39 | 10.6 | 30.97 | 24.56 | 23.01 | tr H0W7C8 H0W7C8_CAVPO | Uncharacterized protein (Fragment) OS=Cavia<br>porcellus GN=POLDIP3 PE=4 SV=1 | CAVPO | 6  |

|      |       |      |       |       |       |                        |                                                                              |       |    |
|------|-------|------|-------|-------|-------|------------------------|------------------------------------------------------------------------------|-------|----|
| 1128 | 10.38 | 10.6 | 39.01 | 27.42 | 21.51 | tr H0V5X3 H0V5X3_CAVPO | Uncharacterized protein OS=Cavia porcellus<br>GN=COPS3 PE=4 SV=1             | CAVPO | 8  |
| 1129 | 10.37 | 10.5 | 30.67 | 23.95 | 21.43 | tr H0VJZ6 H0VJZ6_CAVPO | Uncharacterized protein OS=Cavia porcellus<br>GN=SRSF7 PE=4 SV=1             | CAVPO | 6  |
| 1130 | 10.36 | 10.4 | 27.04 | 27.04 | 19.74 | tr H0V052 H0V052_CAVPO | Uncharacterized protein OS=Cavia porcellus<br>GN=NUCKS1 PE=4 SV=1            | CAVPO | 7  |
| 1131 | 10.33 | 10.4 | 41.9  | 32.38 | 23.17 | tr H0VQD1 H0VQD1_CAVPO | Uncharacterized protein OS=Cavia porcellus<br>GN=C11orf54 PE=4 SV=1          | CAVPO | 5  |
| 1132 | 10.33 | 10.5 | 26.28 | 23.72 | 23.72 | tr H0VXK7 H0VXK7_CAVPO | Uncharacterized protein OS=Cavia porcellus<br>GN=RDH8 PE=3 SV=1              | CAVPO | 6  |
| 1133 | 10.32 | 10.4 | 34.68 | 31.53 | 31.53 | tr H0VWY1 H0VWY1_CAVPO | Uncharacterized protein OS=Cavia porcellus<br>GN=GSTA4 PE=4 SV=1             | CAVPO | 6  |
| 1134 | 10.31 | 10.4 | 62.8  | 62.8  | 39.61 | tr H0W3N2 H0W3N2_CAVPO | Uncharacterized protein (Fragment) OS=Cavia<br>porcellus GN=LYPLA1 PE=4 SV=1 | CAVPO | 5  |
| 1135 | 10.3  | 10.4 | 69.05 | 66.67 | 61.9  | tr H0UTW1 H0UTW1_CAVPO | Uncharacterized protein (Fragment) OS=Cavia<br>porcellus GN=DBI PE=4 SV=1    | CAVPO | 19 |
| 1136 | 10.3  | 10.4 | 51.88 | 43.75 | 38.75 | tr H0VLC3 H0VLC3_CAVPO | Uncharacterized protein (Fragment) OS=Cavia<br>porcellus GN=EIF3J PE=4 SV=1  | CAVPO | 5  |
| 1137 | 10.3  | 10.5 | 31.97 | 27.6  | 22.13 | tr H0VRC7 H0VRC7_CAVPO | Uncharacterized protein (Fragment) OS=Cavia<br>porcellus GN=TXNDC5 PE=3 SV=1 | CAVPO | 6  |
| 1138 | 10.29 | 10.3 | 37.96 | 31.39 | 27.74 | tr H0UYF3 H0UYF3_CAVPO | Uncharacterized protein (Fragment) OS=Cavia<br>porcellus GN=NIT2 PE=4 SV=1   | CAVPO | 6  |
| 1139 | 10.26 | 10.3 | 47.22 | 36.11 | 32.22 | tr H0W7I1 H0W7I1_CAVPO | Uncharacterized protein OS=Cavia porcellus<br>GN=APRT PE=3 SV=1              | CAVPO | 7  |
| 1140 | 10.25 | 10.5 | 20.42 | 17.26 | 15.16 | tr H0VJD3 H0VJD3_CAVPO | Uncharacterized protein OS=Cavia porcellus<br>GN=ZMPSTE24 PE=4 SV=1          | CAVPO | 6  |
| 1141 | 10.24 | 10.3 | 14.83 | 12.45 | 11.05 | tr H0UVR3 H0UVR3_CAVPO | Uncharacterized protein OS=Cavia porcellus<br>GN=BBS7 PE=4 SV=1              | CAVPO | 6  |

|      |       |      |       |       |       |                        |                                                                           |       |    |
|------|-------|------|-------|-------|-------|------------------------|---------------------------------------------------------------------------|-------|----|
| 1142 | 10.23 | 10.3 | 34.83 | 34.83 | 28.36 | tr H0VY67 H0VY67_CAVPO | Proteasome subunit beta type OS=Cavia porcellus GN=PSMB2 PE=3 SV=1        | CAVPO | 7  |
| 1143 | 10.21 | 10.8 | 43.89 | 38.61 | 29.04 | tr H0VAK6 H0VAK6_CAVPO | Uncharacterized protein (Fragment) OS=Cavia porcellus GN=ECH1 PE=3 SV=1   | CAVPO | 7  |
| 1144 | 10.21 | 10.3 | 65.38 | 58.79 | 58.79 | tr H0VUE8 H0VUE8_CAVPO | Uncharacterized protein OS=Cavia porcellus GN=Dnajc5 PE=4 SV=1            | CAVPO | 6  |
| 1145 | 10.2  | 10.3 | 19.31 | 16.14 | 12.22 | tr H0UXE2 H0UXE2_CAVPO | Uncharacterized protein OS=Cavia porcellus GN=PIP5K1C PE=4 SV=1           | CAVPO | 5  |
| 1146 | 10.2  | 10.3 | 42.08 | 34.84 | 27.6  | tr H0V8M9 H0V8M9_CAVPO | Uncharacterized protein OS=Cavia porcellus GN=SRSF9 PE=4 SV=1             | CAVPO | 6  |
| 1147 | 10.18 | 10.6 | 23.03 | 20.29 | 10.95 | tr H0UZQ8 H0UZQ8_CAVPO | Uncharacterized protein OS=Cavia porcellus GN=KIAA1279 PE=4 SV=1          | CAVPO | 6  |
| 1148 | 10.18 | 10.3 | 29.02 | 28.74 | 26.44 | tr H0V7G6 H0V7G6_CAVPO | Uncharacterized protein OS=Cavia porcellus GN=NUDCD3 PE=4 SV=1            | CAVPO | 7  |
| 1149 | 10.17 | 10.5 | 30.04 | 18.98 | 11.06 | tr H0VJH6 H0VJH6_CAVPO | Uncharacterized protein OS=Cavia porcellus GN=GMPS PE=4 SV=1              | CAVPO | 7  |
| 1150 | 10.15 | 10.2 | 40.75 | 31.32 | 31.32 | tr H0VSU2 H0VSU2_CAVPO | Proteasome subunit beta type OS=Cavia porcellus GN=PSMB4 PE=3 SV=1        | CAVPO | 7  |
| 1151 | 10.13 | 10.2 | 25.09 | 16.96 | 13.43 | tr H0VHM8 H0VHM8_CAVPO | Uncharacterized protein (Fragment) OS=Cavia porcellus GN=FIP1L1 PE=4 SV=1 | CAVPO | 5  |
| 1152 | 10.11 | 10.1 | 61.9  | 61.9  | 61.9  | tr H0W051 H0W051_CAVPO | Uncharacterized protein OS=Cavia porcellus GN=SNCG PE=4 SV=1              | CAVPO | 6  |
| 1153 | 10.1  | 13.6 | 31.96 | 31.96 | 22.44 | tr H0W3J6 H0W3J6_CAVPO | Uncharacterized protein (Fragment) OS=Cavia porcellus GN=PTBP1 PE=4 SV=1  | CAVPO | 10 |
| 1154 | 10.08 | 10.2 | 18.55 | 17    | 11.75 | tr H0W1A8 H0W1A8_CAVPO | Transporter (Fragment) OS=Cavia porcellus GN=SLC6A9 PE=3 SV=1             | CAVPO | 6  |
| 1155 | 10.04 | 10.5 | 46    | 46    | 33.5  | tr H0VRV5 H0VRV5_CAVPO | Uncharacterized protein OS=Cavia porcellus GN=UBE2K PE=3 SV=1             | CAVPO | 6  |

|      |       |      |       |       |       |                        |                                                                                        |       |    |
|------|-------|------|-------|-------|-------|------------------------|----------------------------------------------------------------------------------------|-------|----|
| 1156 | 10.03 | 10   | 48.15 | 40.74 | 40.74 | tr H0V3R6 H0V3R6_CAVPO | ATP synthase-coupling factor 6, mitochondrial<br>OS=Cavia porcellus GN=ATP5J PE=3 SV=1 | CAVPO | 6  |
| 1157 | 10.03 | 10   | 49.42 | 45.35 | 39.53 | tr H0VRA0 H0VRA0_CAVPO | Uncharacterized protein OS=Cavia porcellus<br>GN=MYL12B PE=4 SV=1                      | CAVPO | 6  |
| 1158 | 10.02 | 10   | 27.78 | 27.78 | 27.78 | tr H0UU66 H0UU66_CAVPO | Uncharacterized protein OS=Cavia porcellus<br>GN=TRAPPC3 PE=4 SV=1                     | CAVPO | 5  |
| 1159 | 10.02 | 10   | 14.86 | 12.74 | 12.74 | tr H0VPX4 H0VPX4_CAVPO | Uncharacterized protein OS=Cavia porcellus<br>GN=MAPK9 PE=4 SV=1                       | CAVPO | 5  |
| 1160 | 10.01 | 10.2 | 34.57 | 27.47 | 24.07 | tr H0UVV6 H0UVV6_CAVPO | Uncharacterized protein OS=Cavia porcellus<br>GN=FAM49B PE=4 SV=1                      | CAVPO | 6  |
| 1161 | 10    | 16.7 | 36.56 | 34.06 | 30.31 | tr H0V636 H0V636_CAVPO | Uncharacterized protein (Fragment) OS=Cavia<br>porcellus GN=Gnai1 PE=4 SV=1            | CAVPO | 10 |
| 1162 | 10    | 10   | 12.55 | 12.55 | 12.55 | tr H0VTV4 H0VTV4_CAVPO | Uncharacterized protein OS=Cavia porcellus<br>GN=Adpgk PE=4 SV=1                       | CAVPO | 5  |
| 1163 | 10    | 10   | 44.62 | 44.62 | 44.62 | tr H0W528 H0W528_CAVPO | Uncharacterized protein OS=Cavia porcellus<br>GN=PEA15 PE=4 SV=1                       | CAVPO | 5  |
| 1164 | 9.98  | 10.1 | 58.06 | 58.06 | 46.24 | tr H0UYH3 H0UYH3_CAVPO | Uncharacterized protein OS=Cavia porcellus<br>GN=RBBP9 PE=4 SV=1                       | CAVPO | 5  |
| 1165 | 9.97  | 10   | 41.7  | 36.77 | 36.77 | tr H0V4H6 H0V4H6_CAVPO | Uncharacterized protein OS=Cavia porcellus<br>GN=TPD52 PE=4 SV=1                       | CAVPO | 5  |
| 1166 | 9.95  | 10.2 | 13.66 | 6.618 | 4.068 | tr H0VVK0 H0VVK0_CAVPO | Uncharacterized protein (Fragment) OS=Cavia<br>porcellus GN=MADD PE=4 SV=1             | CAVPO | 5  |
| 1167 | 9.94  | 12.2 | 39.62 | 32.55 | 28.77 | tr H0VNV2 H0VNV2_CAVPO | Uncharacterized protein OS=Cavia porcellus<br>GN=CLTA PE=4 SV=1                        | CAVPO | 6  |
| 1168 | 9.92  | 12.1 | 51.9  | 51.27 | 46.84 | tr H0UYG9 H0UYG9_CAVPO | Uncharacterized protein (Fragment) OS=Cavia<br>porcellus GN=RAB10 PE=3 SV=1            | CAVPO | 9  |
| 1169 | 9.91  | 10.4 | 24.34 | 21.54 | 14.04 | tr H0VD21 H0VD21_CAVPO | Uncharacterized protein OS=Cavia porcellus<br>GN=SLC1A4 PE=4 SV=1                      | CAVPO | 5  |

|      |      |      |       |       |       |                        |                                                                                |       |   |
|------|------|------|-------|-------|-------|------------------------|--------------------------------------------------------------------------------|-------|---|
| 1170 | 9.91 | 10   | 18.49 | 11.76 | 8.824 | tr H0VJR1 H0VJR1_CAVPO | Uncharacterized protein OS=Cavia porcellus<br>GN=Nrxn3 PE=4 SV=1               | CAVPO | 5 |
| 1171 | 9.89 | 9.95 | 37.55 | 28.52 | 28.52 | tr H0V6K5 H0V6K5_CAVPO | Uncharacterized protein OS=Cavia porcellus<br>GN=SCGN PE=4 SV=1                | CAVPO | 6 |
| 1172 | 9.89 | 9.95 | 17.01 | 11.13 | 9.38  | tr H0VGH5 H0VGH5_CAVPO | Uncharacterized protein (Fragment) OS=Cavia<br>porcellus GN=CLPTM1 PE=4 SV=1   | CAVPO | 5 |
| 1173 | 9.86 | 9.89 | 27.19 | 25.31 | 22.81 | tr H0VS03 H0VS03_CAVPO | Uncharacterized protein OS=Cavia porcellus<br>GN=AIMP2 PE=4 SV=1               | CAVPO | 5 |
| 1174 | 9.85 | 10   | 25.59 | 19.43 | 19.43 | tr H0VTD9 H0VTD9_CAVPO | Uncharacterized protein OS=Cavia porcellus<br>GN=AGK PE=4 SV=1                 | CAVPO | 7 |
| 1175 | 9.82 | 9.93 | 55.49 | 53.05 | 53.05 | tr H0UTH4 H0UTH4_CAVPO | Uncharacterized protein OS=Cavia porcellus<br>GN=CNRIP1 PE=4 SV=1              | CAVPO | 8 |
| 1176 | 9.82 | 9.95 | 38.22 | 25.57 | 21.26 | tr H0WBG7 H0WBG7_CAVPO | ATPase Asna1 OS=Cavia porcellus<br>GN=ASNA1 PE=3 SV=1                          | CAVPO | 6 |
| 1177 | 9.8  | 9.83 | 52.81 | 44.59 | 44.59 | tr H0VCT3 H0VCT3_CAVPO | Uncharacterized protein OS=Cavia porcellus<br>GN=LYPLA2 PE=4 SV=1              | CAVPO | 5 |
| 1178 | 9.79 | 9.94 | 11.57 | 8.796 | 5.705 | tr H0VK90 H0VK90_CAVPO | Uncharacterized protein OS=Cavia porcellus<br>GN=TPP2 PE=4 SV=1                | CAVPO | 5 |
| 1179 | 9.78 | 9.97 | 28.04 | 20.66 | 10.15 | tr H0UZ15 H0UZ15_CAVPO | Uncharacterized protein OS=Cavia porcellus<br>GN=PGM3 PE=3 SV=1                | CAVPO | 5 |
| 1180 | 9.78 | 9.95 | 18.14 | 12.5  | 7.48  | tr H0VCU4 H0VCU4_CAVPO | Uncharacterized protein (Fragment) OS=Cavia<br>porcellus GN=Rab3gap1 PE=4 SV=1 | CAVPO | 5 |
| 1181 | 9.78 | 9.95 | 44.77 | 44.77 | 44.77 | tr H0W703 H0W703_CAVPO | Uncharacterized protein OS=Cavia porcellus<br>GN=NDUFA8 PE=4 SV=1              | CAVPO | 7 |
| 1182 | 9.77 | 9.83 | 15.47 | 12.91 | 8.859 | tr H0VAM0 H0VAM0_CAVPO | Uncharacterized protein OS=Cavia porcellus<br>GN=GTPBP1 PE=4 SV=1              | CAVPO | 5 |
| 1183 | 9.77 | 9.8  | 26.33 | 26.33 | 26.33 | tr H0VDB7 H0VDB7_CAVPO | Uncharacterized protein OS=Cavia porcellus<br>GN=SCAMP1 PE=4 SV=1              | CAVPO | 5 |

|      |      |      |       |       |       |                        |                                                                               |       |    |
|------|------|------|-------|-------|-------|------------------------|-------------------------------------------------------------------------------|-------|----|
| 1184 | 9.77 | 9.8  | 30.03 | 24.92 | 24.92 | tr H0VHC4 H0VHC4_CAVPO | Uncharacterized protein OS=Cavia porcellus<br>GN=CPPED1 PE=4 SV=1             | CAVPO | 5  |
| 1185 | 9.77 | 12.1 | 62.18 | 60.9  | 55.77 | tr H0VRA8 H0VRA8_CAVPO | Uncharacterized protein OS=Cavia porcellus<br>GN=CPLX4 PE=4 SV=1              | CAVPO | 8  |
| 1186 | 9.75 | 9.85 | 33.51 | 33.51 | 33.51 | tr H0UWI3 H0UWI3_CAVPO | Uncharacterized protein (Fragment) OS=Cavia<br>porcellus GN=GCA PE=4 SV=1     | CAVPO | 6  |
| 1187 | 9.74 | 9.9  | 24.29 | 13.94 | 12.05 | tr H0V786 H0V786_CAVPO | Uncharacterized protein (Fragment) OS=Cavia<br>porcellus GN=LPCAT1 PE=4 SV=1  | CAVPO | 6  |
| 1188 | 9.73 | 9.85 | 60.74 | 60.74 | 40.74 | tr H0VU69 H0VU69_CAVPO | Uncharacterized protein OS=Cavia porcellus<br>GN=RBP1 PE=3 SV=1               | CAVPO | 6  |
| 1189 | 9.72 | 9.81 | 20.68 | 12.27 | 11.13 | tr H0VCY2 H0VCY2_CAVPO | Uncharacterized protein (Fragment) OS=Cavia<br>porcellus GN=MAP7D2 PE=4 SV=1  | CAVPO | 6  |
| 1190 | 9.71 | 10   | 27.99 | 17.36 | 10.5  | tr H0VJ90 H0VJ90_CAVPO | Uncharacterized protein (Fragment) OS=Cavia<br>porcellus GN=NASP PE=4 SV=1    | CAVPO | 6  |
| 1191 | 9.69 | 9.88 | 37.38 | 31.63 | 22.04 | tr H0V1X9 H0V1X9_CAVPO | Uncharacterized protein OS=Cavia porcellus<br>GN=Prkra PE=4 SV=1              | CAVPO | 5  |
| 1192 | 9.68 | 9.7  | 52.78 | 52.78 | 52.78 | tr H0V0E9 H0V0E9_CAVPO | Peptidyl-prolyl cis-trans isomerase OS=Cavia<br>porcellus GN=FKBP1A PE=4 SV=1 | CAVPO | 6  |
| 1193 | 9.66 | 9.72 | 50.55 | 40.66 | 34.07 | tr H0WBZ3 H0WBZ3_CAVPO | Uncharacterized protein OS=Cavia porcellus<br>GN=Cnpy2 PE=4 SV=1              | CAVPO | 5  |
| 1194 | 9.65 | 10.9 | 48.02 | 40.11 | 40.11 | tr H0VBU7 H0VBU7_CAVPO | Peptidyl-prolyl cis-trans isomerase OS=Cavia<br>porcellus GN=PPIH PE=3 SV=1   | CAVPO | 6  |
| 1195 | 9.65 | 9.84 | 31.52 | 29.62 | 26.36 | tr H0VDH3 H0VDH3_CAVPO | Uncharacterized protein OS=Cavia porcellus<br>GN=RAE1 PE=4 SV=1               | CAVPO | 8  |
| 1196 | 9.62 | 9.67 | 40.79 | 40.79 | 37.28 | tr H0W4F9 H0W4F9_CAVPO | Uncharacterized protein (Fragment) OS=Cavia<br>porcellus GN=APOA1BP PE=3 SV=1 | CAVPO | 6  |
| 1197 | 9.61 | 25.8 | 36.81 | 26.73 | 19.29 | tr H0V0S9 H0V0S9_CAVPO | Uncharacterized protein (Fragment) OS=Cavia<br>porcellus GN=RDY PE=4 SV=1     | CAVPO | 13 |

|      |      |      |       |       |       |                        |                                                                            |       |     |
|------|------|------|-------|-------|-------|------------------------|----------------------------------------------------------------------------|-------|-----|
| 1198 | 9.6  | 9.79 | 18.55 | 14.18 | 9.201 | tr H0UVZ9 H0UVZ9_CAVPO | Uncharacterized protein (Fragment) OS=Cavia porcellus GN=SRPK2 PE=3 SV=1   | CAVPO | 5   |
| 1199 | 9.59 | 82.7 | 81.92 | 79.24 | 78.35 | tr H0V0E4 H0V0E4_CAVPO | Uncharacterized protein OS=Cavia porcellus GN=TUBB4A PE=3 SV=1             | CAVPO | 125 |
| 1200 | 9.59 | 9.62 | 25.31 | 25.31 | 25.31 | tr H0V4U0 H0V4U0_CAVPO | Uncharacterized protein OS=Cavia porcellus GN=Skp1 PE=4 SV=1               | CAVPO | 5   |
| 1201 | 9.58 | 30.8 | 58.39 | 56.38 | 48.66 | tr H0V528 H0V528_CAVPO | Uncharacterized protein OS=Cavia porcellus GN=SLC25A4 PE=3 SV=1            | CAVPO | 27  |
| 1202 | 9.58 | 9.69 | 12.25 | 10.05 | 8.592 | tr H0VAX6 H0VAX6_CAVPO | Transporter (Fragment) OS=Cavia porcellus GN=SLC6A11 PE=3 SV=1             | CAVPO | 5   |
| 1203 | 9.57 | 9.64 | 17.75 | 14.2  | 14.2  | tr H0V5J5 H0V5J5_CAVPO | Uncharacterized protein (Fragment) OS=Cavia porcellus GN=TBL1XR1 PE=4 SV=1 | CAVPO | 6   |
| 1204 | 9.57 | 9.72 | 27.16 | 18.53 | 18.53 | tr H0VYG0 H0VYG0_CAVPO | Uncharacterized protein OS=Cavia porcellus GN=HADH PE=4 SV=1               | CAVPO | 6   |
| 1205 | 9.54 | 9.73 | 37.65 | 37.65 | 23.48 | tr H0VDT7 H0VDT7_CAVPO | Uncharacterized protein OS=Cavia porcellus GN=Atp6v1d PE=4 SV=1            | CAVPO | 5   |
| 1206 | 9.53 | 9.64 | 29.6  | 21.97 | 21.97 | tr H0VZI9 H0VZI9_CAVPO | Uncharacterized protein OS=Cavia porcellus GN=HIST1H1B PE=3 SV=1           | CAVPO | 6   |
| 1207 | 9.52 | 9.69 | 14.97 | 13.05 | 11.71 | tr H0VI86 H0VI86_CAVPO | Uncharacterized protein OS=Cavia porcellus GN=SRC PE=4 SV=1                | CAVPO | 5   |
| 1208 | 9.5  | 9.87 | 14.69 | 10.11 | 5.453 | tr H0VPE8 H0VPE8_CAVPO | Uncharacterized protein OS=Cavia porcellus GN=IQSEC3 PE=4 SV=1             | CAVPO | 5   |
| 1209 | 9.49 | 9.54 | 67.92 | 67.92 | 50.94 | tr H0UUC3 H0UUC3_CAVPO | Uncharacterized protein (Fragment) OS=Cavia porcellus GN=CSTB PE=4 SV=1    | CAVPO | 5   |
| 1210 | 9.49 | 9.89 | 44.63 | 37.6  | 34.71 | tr H0UV88 H0UV88_CAVPO | Uncharacterized protein (Fragment) OS=Cavia porcellus GN=GSTO1 PE=3 SV=1   | CAVPO | 8   |
| 1211 | 9.49 | 9.57 | 41.7  | 39.01 | 33.63 | tr H0V025 H0V025_CAVPO | Uncharacterized protein (Fragment) OS=Cavia porcellus GN=APIP PE=3 SV=1    | CAVPO | 6   |



|      |      |      |       |       |       |                        |                                                                                                     |       |    |
|------|------|------|-------|-------|-------|------------------------|-----------------------------------------------------------------------------------------------------|-------|----|
| 1212 | 9.47 | 9.52 | 28.94 | 28.65 | 26.65 | tr H0W7E8 H0W7E8_CAVPO | Uncharacterized protein OS=Cavia porcellus<br>GN=SCAMP3 PE=4 SV=1                                   | CAVPO | 5  |
| 1213 | 9.44 | 10.4 | 23.23 | 18.36 | 14.38 | tr H0UZ21 H0UZ21_CAVPO | Malic enzyme (Fragment) OS=Cavia porcellus<br>GN=ME1 PE=3 SV=1                                      | CAVPO | 7  |
| 1214 | 9.44 | 9.7  | 49.31 | 37.79 | 23.96 | tr H0V3J8 H0V3J8_CAVPO | Uncharacterized protein OS=Cavia porcellus<br>GN=GRB2 PE=4 SV=1                                     | CAVPO | 5  |
| 1215 | 9.44 | 9.66 | 7.356 | 6.437 | 3.494 | tr H0VP27 H0VP27_CAVPO | Uncharacterized protein (Fragment) OS=Cavia<br>porcellus GN=SEC16A PE=4 SV=1                        | CAVPO | 6  |
| 1216 | 9.43 | 9.47 | 35.92 | 26.53 | 26.53 | tr H0VND2 H0VND2_CAVPO | Eukaryotic translation initiation factor 6<br>OS=Cavia porcellus GN=EIF6 PE=1 SV=1                  | CAVPO | 6  |
| 1217 | 9.43 | 9.47 | 40.6  | 40.6  | 40.6  | tr H0VRQ6 H0VRQ6_CAVPO | Uncharacterized protein (Fragment) OS=Cavia<br>porcellus GN=HRSP12 PE=4 SV=1                        | CAVPO | 7  |
| 1218 | 9.42 | 9.59 | 41.97 | 41.97 | 31.75 | tr H0UXP3 H0UXP3_CAVPO | Cytochrome b-c1 complex subunit Rieske,<br>mitochondrial OS=Cavia porcellus<br>GN=UQCRFS1 PE=3 SV=1 | CAVPO | 7  |
| 1219 | 9.41 | 9.54 | 36.25 | 30.94 | 30.94 | tr H0V777 H0V777_CAVPO | Uncharacterized protein (Fragment) OS=Cavia<br>porcellus GN=ETFA PE=4 SV=1                          | CAVPO | 6  |
| 1220 | 9.4  | 9.51 | 30.27 | 27.89 | 26.71 | tr H0W0L4 H0W0L4_CAVPO | Uncharacterized protein OS=Cavia porcellus<br>GN=CA14 PE=4 SV=1                                     | CAVPO | 7  |
| 1221 | 9.4  | 9.96 | 11.57 | 9.643 | 7.04  | tr H0W4F8 H0W4F8_CAVPO | Uncharacterized protein OS=Cavia porcellus<br>GN=PITRM1 PE=3 SV=1                                   | CAVPO | 5  |
| 1222 | 9.39 | 9.52 | 22.73 | 17.46 | 17.46 | tr H0V019 H0V019_CAVPO | Uncharacterized protein (Fragment) OS=Cavia<br>porcellus GN=HSDL2 PE=4 SV=1                         | CAVPO | 5  |
| 1223 | 9.38 | 9.42 | 36.5  | 35.5  | 35.5  | tr H0VFT8 H0VFT8_CAVPO | Uncharacterized protein OS=Cavia porcellus<br>GN=GUCA1B PE=4 SV=1                                   | CAVPO | 5  |
| 1224 | 9.36 | 9.4  | 33.7  | 28.89 | 28.89 | tr H0V7I1 H0V7I1_CAVPO | Uncharacterized protein (Fragment) OS=Cavia<br>porcellus GN=TRA2B PE=4 SV=1                         | CAVPO | 10 |
| 1225 | 9.36 | 9.4  | 42.86 | 42.86 | 42.86 | tr H0WA07 H0WA07_CAVPO | Thioredoxin OS=Cavia porcellus                                                                      | CAVPO | 5  |

|      |      |      |       |       |       |                        |                                                                              |       |   |
|------|------|------|-------|-------|-------|------------------------|------------------------------------------------------------------------------|-------|---|
|      |      |      |       |       |       |                        | GN=LOC100729881 PE=3 SV=1                                                    |       |   |
| 1226 | 9.34 | 9.57 | 19.63 | 12.27 | 7.362 | tr H0VQL0 H0VQL0_CAVPO | Uncharacterized protein OS=Cavia porcellus<br>GN=GTF3C4 PE=4 SV=1            | CAVPO | 5 |
| 1227 | 9.33 | 9.47 | 32.38 | 32.38 | 29.05 | tr H0UW56 H0UW56_CAVPO | Uncharacterized protein OS=Cavia porcellus<br>GN=NDUFS8 PE=3 SV=1            | CAVPO | 5 |
| 1228 | 9.33 | 12.6 | 39.13 | 32.61 | 32.61 | tr H0VLL2 H0VLL2_CAVPO | Uncharacterized protein (Fragment) OS=Cavia<br>porcellus GN=RPRD1A PE=4 SV=1 | CAVPO | 8 |
| 1229 | 9.31 | 9.48 | 26.15 | 26.15 | 26.15 | tr H0UYZ6 H0UYZ6_CAVPO | Uncharacterized protein OS=Cavia porcellus<br>GN=NDRG2 PE=4 SV=1             | CAVPO | 6 |
| 1230 | 9.31 | 9.52 | 42.76 | 33.45 | 26.55 | tr H0VMZ7 H0VMZ7_CAVPO | Uncharacterized protein (Fragment) OS=Cavia<br>porcellus GN=Tsnax PE=4 SV=1  | CAVPO | 6 |
| 1231 | 9.3  | 9.41 | 38.98 | 34.5  | 24.28 | tr H0UTR6 H0UTR6_CAVPO | Uncharacterized protein OS=Cavia porcellus<br>GN=Fahd2a PE=4 SV=1            | CAVPO | 5 |
| 1232 | 9.29 | 9.42 | 39.25 | 27.73 | 24.92 | tr H0WDY5 H0WDY5_CAVPO | Uncharacterized protein (Fragment) OS=Cavia<br>porcellus PE=4 SV=1           | CAVPO | 5 |
| 1233 | 9.28 | 9.4  | 42.64 | 39.59 | 32.49 | tr H0VP81 H0VP81_CAVPO | Uncharacterized protein OS=Cavia porcellus<br>GN=Vbp1 PE=4 SV=1              | CAVPO | 6 |
| 1234 | 9.26 | 9.5  | 24.1  | 19.08 | 15.26 | tr H0VGQ4 H0VGQ4_CAVPO | Tubby-like protein (Fragment) OS=Cavia<br>porcellus GN=TUB PE=3 SV=1         | CAVPO | 6 |
| 1235 | 9.26 | 9.36 | 41.57 | 36.7  | 27.72 | tr H0W0K4 H0W0K4_CAVPO | Uncharacterized protein (Fragment) OS=Cavia<br>porcellus GN=SPR PE=4 SV=1    | CAVPO | 5 |
| 1236 | 9.22 | 9.3  | 25.56 | 21.55 | 17.79 | tr H0UT02 H0UT02_CAVPO | Uncharacterized protein OS=Cavia porcellus<br>GN=BCL2L13 PE=4 SV=1           | CAVPO | 5 |
| 1237 | 9.21 | 9.52 | 27.11 | 13.8  | 6.716 | tr H0V0H4 H0V0H4_CAVPO | Uncharacterized protein OS=Cavia porcellus<br>GN=DDX23 PE=3 SV=1             | CAVPO | 5 |
| 1238 | 9.21 | 9.29 | 21.41 | 19.46 | 16.55 | tr H0V6B8 H0V6B8_CAVPO | Uncharacterized protein (Fragment) OS=Cavia<br>porcellus GN=WDFY1 PE=4 SV=1  | CAVPO | 5 |

|      |      |      |       |       |       |                        |                                                                                                  |       |    |
|------|------|------|-------|-------|-------|------------------------|--------------------------------------------------------------------------------------------------|-------|----|
| 1239 | 9.19 | 19.6 | 54.19 | 50.66 | 50.66 | tr H0UW38 H0UW38_CAVPO | Uncharacterized protein OS=Cavia porcellus<br>GN=RAB3C PE=3 SV=1                                 | CAVPO | 14 |
| 1240 | 9.14 | 9.28 | 34.78 | 33.15 | 22.55 | tr H0VVH1 H0VVH1_CAVPO | Uncharacterized protein (Fragment) OS=Cavia<br>porcellus GN=DDI2 PE=4 SV=1                       | CAVPO | 7  |
| 1241 | 9.11 | 9.18 | 24.25 | 21.24 | 10.97 | tr H0VEC3 H0VEC3_CAVPO | Uncharacterized protein OS=Cavia porcellus<br>GN=USP39 PE=4 SV=1                                 | CAVPO | 4  |
| 1242 | 9.11 | 9.26 | 28.67 | 24.67 | 24.67 | tr Q8VD40 Q8VD40_CAVPO | F-box protein OCP1 OS=Cavia porcellus<br>GN=OCP1 PE=2 SV=1                                       | CAVPO | 6  |
| 1243 | 9.09 | 9.31 | 15.25 | 10.31 | 5.451 | tr H0VMR7 H0VMR7_CAVPO | DNA-directed RNA polymerase OS=Cavia<br>porcellus GN=POLR2B PE=3 SV=1                            | CAVPO | 4  |
| 1244 | 9.08 | 9.14 | 32.5  | 21.88 | 19.06 | tr H0VEG4 H0VEG4_CAVPO | Eukaryotic translation initiation factor 3<br>subunit G OS=Cavia porcellus GN=EIF3G<br>PE=3 SV=1 | CAVPO | 5  |
| 1245 | 9.08 | 9.26 | 26.62 | 26.62 | 15.26 | tr H0VR10 H0VR10_CAVPO | Uncharacterized protein OS=Cavia porcellus<br>GN=TECR PE=4 SV=1                                  | CAVPO | 6  |
| 1246 | 9.08 | 9.31 | 10.81 | 5.043 | 3.218 | tr H0WDG6 H0WDG6_CAVPO | Uncharacterized protein OS=Cavia porcellus<br>GN=GTF3C1 PE=4 SV=1                                | CAVPO | 5  |
| 1247 | 9.07 | 9.2  | 51.47 | 26.71 | 26.71 | tr H0VTD2 H0VTD2_CAVPO | Uncharacterized protein (Fragment) OS=Cavia<br>porcellus GN=Eif2s2 PE=4 SV=1                     | CAVPO | 7  |
| 1248 | 9.07 | 9.2  | 67.65 | 53.27 | 46.41 | tr H0W2Y9 H0W2Y9_CAVPO | Uncharacterized protein OS=Cavia porcellus<br>GN=Pabpn1 PE=4 SV=1                                | CAVPO | 6  |
| 1249 | 9.06 | 9.13 | 26.11 | 21.97 | 21.97 | tr H0V7Z3 H0V7Z3_CAVPO | Autophagy-related protein 3 OS=Cavia<br>porcellus GN=ATG3 PE=3 SV=1                              | CAVPO | 5  |
| 1250 | 9.06 | 9.44 | 35.57 | 24.11 | 20.95 | tr H0VRI7 H0VRI7_CAVPO | Uncharacterized protein OS=Cavia porcellus<br>GN=DNAJC8 PE=4 SV=1                                | CAVPO | 6  |
| 1251 | 9.05 | 9.15 | 60.67 | 58.43 | 58.43 | tr H0VA88 H0VA88_CAVPO | Uncharacterized protein OS=Cavia porcellus<br>GN=BANF1 PE=4 SV=1                                 | CAVPO | 5  |
| 1252 | 9.04 | 9.24 | 22.49 | 17.09 | 10.8  | tr H0VMN5 H0VMN5_CAVPO | Uncharacterized protein OS=Cavia porcellus                                                       | CAVPO | 6  |

|      |      |      |       |       |       |                        |                                                                                                  |       |    |
|------|------|------|-------|-------|-------|------------------------|--------------------------------------------------------------------------------------------------|-------|----|
|      |      |      |       |       |       |                        | GN=PLAA PE=4 SV=1                                                                                |       |    |
| 1253 | 9.03 | 11.2 | 54.78 | 54.78 | 47.83 | tr H0W7J9 H0W7J9_CAVPO | Uncharacterized protein OS=Cavia porcellus<br>GN=RPL30 PE=3 SV=1                                 | CAVPO | 6  |
| 1254 | 9.02 | 10.7 | 32.32 | 25.8  | 14.81 | tr H0VH09 H0VH09_CAVPO | Uncharacterized protein OS=Cavia porcellus<br>GN=HTATSF1 PE=4 SV=1                               | CAVPO | 6  |
| 1255 | 9.01 | 9.1  | 30.75 | 27.81 | 19.79 | tr H0V1U1 H0V1U1_CAVPO | Eukaryotic translation initiation factor 3<br>subunit M OS=Cavia porcellus GN=EIF3M<br>PE=3 SV=1 | CAVPO | 5  |
| 1256 | 9.01 | 9.37 | 10.01 | 6.098 | 2.33  | tr H0V3Q7 H0V3Q7_CAVPO | Uncharacterized protein OS=Cavia porcellus<br>GN=NUP205 PE=4 SV=1                                | CAVPO | 4  |
| 1257 | 9.01 | 9.23 | 29.19 | 19.28 | 12.97 | tr H0VE13 H0VE13_CAVPO | Uncharacterized protein OS=Cavia porcellus<br>GN=IK PE=4 SV=1                                    | CAVPO | 5  |
| 1258 | 9    | 11.8 | 23.83 | 20.47 | 20.21 | tr H0W3W1 H0W3W1_CAVPO | Uncharacterized protein (Fragment) OS=Cavia<br>porcellus GN=NAP1L1 PE=3 SV=1                     | CAVPO | 7  |
| 1259 | 9    | 9.1  | 30.05 | 24.04 | 24.04 | tr H0W4U6 H0W4U6_CAVPO | Uncharacterized protein OS=Cavia porcellus<br>GN=UBE2M PE=3 SV=1                                 | CAVPO | 5  |
| 1260 | 8.97 | 9.09 | 44.37 | 34.51 | 34.51 | tr H0W7J7 H0W7J7_CAVPO | Uncharacterized protein (Fragment) OS=Cavia<br>porcellus GN=AP2S1 PE=4 SV=1                      | CAVPO | 6  |
| 1261 | 8.96 | 9.09 | 27.96 | 19.73 | 15.09 | tr H0V7K9 H0V7K9_CAVPO | Uncharacterized protein OS=Cavia porcellus<br>GN=MTDH PE=4 SV=1                                  | CAVPO | 6  |
| 1262 | 8.95 | 8.99 | 30.36 | 30.36 | 30.36 | tr H0UZP9 H0UZP9_CAVPO | Uncharacterized protein (Fragment) OS=Cavia<br>porcellus GN=UNC119 PE=4 SV=1                     | CAVPO | 6  |
| 1263 | 8.95 | 9.04 | 8.207 | 6.944 | 5.934 | tr H0VAV9 H0VAV9_CAVPO | Uncharacterized protein (Fragment) OS=Cavia<br>porcellus GN=CD44 PE=4 SV=1                       | CAVPO | 5  |
| 1264 | 8.94 | 8.97 | 36.41 | 36.41 | 36.41 | tr H0VPI1 H0VPI1_CAVPO | Uncharacterized protein (Fragment) OS=Cavia<br>porcellus GN=Rpl12 PE=3 SV=1                      | CAVPO | 5  |
| 1265 | 8.94 | 16.2 | 57.36 | 57.36 | 57.36 | tr H0VTH8 H0VTH8_CAVPO | Uncharacterized protein OS=Cavia porcellus<br>GN=LIN7C PE=4 SV=1                                 | CAVPO | 10 |

|      |      |      |       |       |       |                        |                                                                              |       |     |
|------|------|------|-------|-------|-------|------------------------|------------------------------------------------------------------------------|-------|-----|
| 1266 | 8.94 | 9    | 24.34 | 16.1  | 11.99 | tr H0VTZ0 H0VTZ0_CAVPO | Uncharacterized protein OS=Cavia porcellus<br>GN=P4ha1 PE=4 SV=1             | CAVPO | 5   |
| 1267 | 8.92 | 8.98 | 24.53 | 24.29 | 12.26 | tr H0VNJ3 H0VNJ3_CAVPO | Uncharacterized protein OS=Cavia porcellus<br>GN=PACSIN3 PE=4 SV=1           | CAVPO | 4   |
| 1268 | 8.91 | 9.05 | 21.12 | 18.65 | 13.53 | tr H0V2E7 H0V2E7_CAVPO | Uncharacterized protein OS=Cavia porcellus<br>GN=PNN PE=4 SV=1               | CAVPO | 6   |
| 1269 | 8.89 | 9.01 | 34.1  | 31.03 | 25.29 | tr H0VE65 H0VE65_CAVPO | Proliferating cell nuclear antigen OS=Cavia<br>porcellus GN=PCNA PE=3 SV=1   | CAVPO | 5   |
| 1270 | 8.87 | 14   | 34.89 | 31.65 | 31.65 | tr H0VD19 H0VD19_CAVPO | Uncharacterized protein (Fragment) OS=Cavia<br>porcellus GN=MSI2 PE=4 SV=1   | CAVPO | 7   |
| 1271 | 8.87 | 11.2 | 18.92 | 13.01 | 10.81 | tr H0VP49 H0VP49_CAVPO | Uncharacterized protein (Fragment) OS=Cavia<br>porcellus GN=PGM2 PE=3 SV=1   | CAVPO | 6   |
| 1272 | 8.87 | 12.7 | 20.12 | 16.56 | 14.24 | tr H0VWS3 H0VWS3_CAVPO | Uncharacterized protein OS=Cavia porcellus<br>PE=4 SV=1                      | CAVPO | 8   |
| 1273 | 8.86 | 71.3 | 84.82 | 84.82 | 84.6  | tr H0V3I8 H0V3I8_CAVPO | Uncharacterized protein (Fragment) OS=Cavia<br>porcellus GN=TUBA4A PE=3 SV=1 | CAVPO | 120 |
| 1274 | 8.84 | 8.91 | 14.56 | 10.32 | 5.619 | tr H0V9X2 H0V9X2_CAVPO | Uncharacterized protein OS=Cavia porcellus<br>GN=PPP6R3 PE=4 SV=1            | CAVPO | 4   |
| 1275 | 8.84 | 8.97 | 40    | 40    | 24.62 | tr H0VQK1 H0VQK1_CAVPO | Uncharacterized protein OS=Cavia porcellus<br>GN=DPM1 PE=4 SV=1              | CAVPO | 5   |
| 1276 | 8.83 | 8.91 | 19.17 | 14.03 | 13.04 | tr H0V0Z5 H0V0Z5_CAVPO | Uncharacterized protein OS=Cavia porcellus<br>GN=CAMKV PE=4 SV=1             | CAVPO | 6   |
| 1277 | 8.83 | 15.2 | 43.96 | 40.1  | 40.1  | tr H0VP79 H0VP79_CAVPO | Uncharacterized protein OS=Cavia porcellus<br>GN=RAB8A PE=3 SV=1             | CAVPO | 10  |
| 1278 | 8.83 | 8.87 | 41.54 | 35.38 | 35.38 | tr H0W074 H0W074_CAVPO | Uncharacterized protein OS=Cavia porcellus<br>GN=RPS15A PE=3 SV=1            | CAVPO | 5   |
| 1279 | 8.83 | 9.05 | 11.83 | 8.594 | 6.027 | tr H0W2J8 H0W2J8_CAVPO | Uncharacterized protein OS=Cavia porcellus<br>GN=CHERP PE=4 SV=1             | CAVPO | 4   |

|      |      |      |       |       |       |                        |                                                                             |       |    |
|------|------|------|-------|-------|-------|------------------------|-----------------------------------------------------------------------------|-------|----|
| 1280 | 8.77 | 8.8  | 49.49 | 49.49 | 49.49 | tr H0WDN4 H0WDN4_CAVPO | Acylphosphatase OS=Cavia porcellus<br>GN=ACYP1 PE=3 SV=1                    | CAVPO | 6  |
| 1281 | 8.75 | 8.81 | 64.6  | 63.72 | 63.72 | tr H0VQT8 H0VQT8_CAVPO | Uncharacterized protein OS=Cavia porcellus<br>GN=Eif1 PE=4 SV=1             | CAVPO | 6  |
| 1282 | 8.75 | 8.89 | 13.95 | 10.68 | 7.715 | tr H0W7W7 H0W7W7_CAVPO | Uncharacterized protein (Fragment) OS=Cavia<br>porcellus GN=MAP1S PE=4 SV=1 | CAVPO | 5  |
| 1283 | 8.73 | 8.85 | 30.77 | 27.97 | 14.22 | tr H0VUP6 H0VUP6_CAVPO | Uncharacterized protein OS=Cavia porcellus<br>GN=ACTL6A PE=3 SV=1           | CAVPO | 4  |
| 1284 | 8.72 | 8.79 | 66.46 | 56.52 | 56.52 | tr H0W7Q3 H0W7Q3_CAVPO | Uncharacterized protein OS=Cavia porcellus<br>GN=LAMTOR1 PE=4 SV=1          | CAVPO | 5  |
| 1285 | 8.71 | 8.8  | 55.93 | 50.85 | 50.85 | tr H0W335 H0W335_CAVPO | Uncharacterized protein OS=Cavia porcellus<br>GN=C19orf70 PE=4 SV=1         | CAVPO | 5  |
| 1286 | 8.69 | 15.9 | 62.96 | 55.56 | 48.15 | tr H0W4H3 H0W4H3_CAVPO | Uncharacterized protein OS=Cavia porcellus<br>GN=RAB2B PE=3 SV=1            | CAVPO | 10 |
| 1287 | 8.67 | 9.8  | 36.12 | 33.48 | 33.48 | tr Q9TEG8 Q9TEG8_CAVPO | Cytochrome c oxidase subunit 2 OS=Cavia<br>porcellus GN=COII PE=3 SV=1      | CAVPO | 9  |
| 1288 | 8.65 | 8.8  | 21.7  | 15.73 | 12.48 | tr H0V723 H0V723_CAVPO | Uncharacterized protein OS=Cavia porcellus<br>GN=COASY PE=3 SV=1            | CAVPO | 6  |
| 1289 | 8.64 | 8.75 | 23.64 | 23.64 | 16.31 | tr H0VD76 H0VD76_CAVPO | Ribosome biogenesis protein WDR12<br>OS=Cavia porcellus GN=Wdr12 PE=3 SV=1  | CAVPO | 5  |
| 1290 | 8.61 | 8.73 | 33.08 | 16.92 | 16.92 | tr H0UWR0 H0UWR0_CAVPO | Uncharacterized protein OS=Cavia porcellus<br>GN=WTAP PE=4 SV=1             | CAVPO | 5  |
| 1291 | 8.61 | 8.73 | 26.63 | 19.2  | 19.2  | tr H0V3J1 H0V3J1_CAVPO | Uncharacterized protein OS=Cavia porcellus<br>GN=DNAJB2 PE=4 SV=1           | CAVPO | 5  |
| 1292 | 8.61 | 8.86 | 51.3  | 51.3  | 47.4  | tr H0V6W8 H0V6W8_CAVPO | Uncharacterized protein OS=Cavia porcellus<br>GN=UBE2L3 PE=3 SV=1           | CAVPO | 5  |
| 1293 | 8.61 | 8.7  | 28.62 | 26.26 | 21.89 | tr H0VJH4 H0VJH4_CAVPO | Uncharacterized protein OS=Cavia porcellus<br>GN=EMC2 PE=4 SV=1             | CAVPO | 5  |

|      |      |      |       |       |       |                        |                                                                               |       |   |
|------|------|------|-------|-------|-------|------------------------|-------------------------------------------------------------------------------|-------|---|
| 1294 | 8.59 | 8.69 | 11.84 | 8.635 | 5.71  | tr H0V9Q9 H0V9Q9_CAVPO | Uncharacterized protein (Fragment) OS=Cavia porcellus GN=STT3A PE=4 SV=1      | CAVPO | 5 |
| 1295 | 8.57 | 8.74 | 22.68 | 17.58 | 17.58 | tr H0VE80 H0VE80_CAVPO | Uncharacterized protein (Fragment) OS=Cavia porcellus GN=STAM PE=4 SV=1       | CAVPO | 6 |
| 1296 | 8.57 | 8.66 | 44.88 | 44.39 | 32.2  | tr H0W8S1 H0W8S1_CAVPO | Proteasome subunit beta type (Fragment) OS=Cavia porcellus GN=PSMB3 PE=3 SV=1 | CAVPO | 6 |
| 1297 | 8.56 | 8.6  | 14.61 | 9.608 | 6.766 | tr H0UVZ4 H0UVZ4_CAVPO | Uncharacterized protein OS=Cavia porcellus GN=SURF1 PE=4 SV=1                 | CAVPO | 4 |
| 1298 | 8.56 | 8.6  | 46.72 | 38.52 | 22.13 | tr H0WCF4 H0WCF4_CAVPO | L-xylulose reductase OS=Cavia porcellus GN=DCXR PE=4 SV=1                     | CAVPO | 4 |
| 1299 | 8.55 | 8.75 | 19.56 | 8.685 | 4.225 | tr H0UUT0 H0UUT0_CAVPO | Uncharacterized protein (Fragment) OS=Cavia porcellus GN=IARS PE=3 SV=1       | CAVPO | 4 |
| 1300 | 8.55 | 9    | 12.67 | 6.823 | 3.606 | tr H0VAA0 H0VAA0_CAVPO | Uncharacterized protein OS=Cavia porcellus GN=MYO18A PE=4 SV=1                | CAVPO | 5 |
| 1301 | 8.54 | 8.57 | 43.05 | 36.42 | 29.8  | tr H0W4J5 H0W4J5_CAVPO | Uncharacterized protein OS=Cavia porcellus GN=Rps14 PE=3 SV=1                 | CAVPO | 4 |
| 1302 | 8.54 | 8.61 | 30.07 | 24.13 | 21.68 | tr H0W591 H0W591_CAVPO | Uncharacterized protein OS=Cavia porcellus GN=CRX PE=3 SV=1                   | CAVPO | 6 |
| 1303 | 8.52 | 8.56 | 40.84 | 34.55 | 29.32 | tr H0UYK8 H0UYK8_CAVPO | Uncharacterized protein OS=Cavia porcellus GN=HPCAL4 PE=4 SV=1                | CAVPO | 5 |
| 1304 | 8.52 | 8.77 | 10.74 | 5.479 | 4.767 | tr H0VBY7 H0VBY7_CAVPO | Uncharacterized protein (Fragment) OS=Cavia porcellus GN=MLLT4 PE=4 SV=1      | CAVPO | 6 |
| 1305 | 8.51 | 8.62 | 50.28 | 50.28 | 40.88 | tr H0V5M0 H0V5M0_CAVPO | Malignant T-cell-amplified sequence OS=Cavia porcellus GN=MCTS1 PE=3 SV=1     | CAVPO | 5 |
| 1306 | 8.49 | 8.64 | 25.88 | 18.36 | 12.19 | tr H0V9Y4 H0V9Y4_CAVPO | Uncharacterized protein OS=Cavia porcellus GN=ABCE1 PE=3 SV=1                 | CAVPO | 5 |
| 1307 | 8.49 | 8.66 | 45.45 | 39.39 | 24.24 | tr H0VG44 H0VG44_CAVPO | Uncharacterized protein OS=Cavia porcellus GN=SRI PE=4 SV=1                   | CAVPO | 5 |

|      |      |      |       |       |       |                        |                                                                             |       |   |
|------|------|------|-------|-------|-------|------------------------|-----------------------------------------------------------------------------|-------|---|
| 1308 | 8.47 | 8.63 | 36.71 | 21.84 | 21.52 | tr H0V379 H0V379_CAVPO | Uncharacterized protein OS=Cavia porcellus<br>GN=PDLIM3 PE=4 SV=1           | CAVPO | 5 |
| 1309 | 8.47 | 10.6 | 41.3  | 41.3  | 41.3  | tr H0VBZ1 H0VBZ1_CAVPO | Uncharacterized protein OS=Cavia porcellus<br>GN=RAP1B PE=4 SV=1            | CAVPO | 7 |
| 1310 | 8.47 | 8.69 | 18.74 | 13.77 | 4.589 | tr H0VRL3 H0VRL3_CAVPO | Uncharacterized protein OS=Cavia porcellus<br>GN=OGT PE=4 SV=1              | CAVPO | 4 |
| 1311 | 8.47 | 8.58 | 51.22 | 51.22 | 35.77 | tr H0VUM8 H0VUM8_CAVPO | Uncharacterized protein (Fragment) OS=Cavia<br>porcellus GN=PHPT1 PE=4 SV=1 | CAVPO | 5 |
| 1312 | 8.45 | 8.54 | 38.59 | 21.14 | 19.13 | tr H0V9M0 H0V9M0_CAVPO | Apolipoprotein E OS=Cavia porcellus<br>GN=APOE PE=3 SV=1                    | CAVPO | 5 |
| 1313 | 8.45 | 8.73 | 26.89 | 19.32 | 17.05 | tr H0VHL0 H0VHL0_CAVPO | Uncharacterized protein (Fragment) OS=Cavia<br>porcellus GN=PRPF4 PE=4 SV=1 | CAVPO | 7 |
| 1314 | 8.44 | 8.57 | 29.66 | 29.66 | 29.66 | tr H0V9N7 H0V9N7_CAVPO | Uncharacterized protein OS=Cavia porcellus<br>GN=PON2 PE=4 SV=1             | CAVPO | 6 |
| 1315 | 8.43 | 8.46 | 36.02 | 36.02 | 32.7  | tr H0VLX4 H0VLX4_CAVPO | Uncharacterized protein OS=Cavia porcellus<br>GN=NACA2 PE=4 SV=1            | CAVPO | 5 |
| 1316 | 8.42 | 8.51 | 24.03 | 22.08 | 17.53 | tr H0VIP9 H0VIP9_CAVPO | Uncharacterized protein (Fragment) OS=Cavia<br>porcellus GN=SDSL PE=4 SV=1  | CAVPO | 4 |
| 1317 | 8.41 | 8.62 | 22.57 | 15.7  | 10.76 | tr H0VJ80 H0VJ80_CAVPO | Diacylglycerol kinase OS=Cavia porcellus<br>GN=DGKE PE=3 SV=1               | CAVPO | 7 |
| 1318 | 8.39 | 8.5  | 35.04 | 30.48 | 21.94 | tr H0W7N7 H0W7N7_CAVPO | Uncharacterized protein OS=Cavia porcellus<br>GN=NEGR1 PE=4 SV=1            | CAVPO | 4 |
| 1319 | 8.38 | 8.92 | 19.72 | 15.99 | 11.19 | tr H0V6I2 H0V6I2_CAVPO | Uncharacterized protein OS=Cavia porcellus<br>GN=Mccc2 PE=4 SV=1            | CAVPO | 5 |
| 1320 | 8.37 | 8.5  | 35.76 | 31.69 | 29.36 | tr H0UVT1 H0UVT1_CAVPO | Uncharacterized protein OS=Cavia porcellus<br>GN=PVRL1 PE=4 SV=1            | CAVPO | 7 |
| 1321 | 8.36 | 8.52 | 29.68 | 25.81 | 19.03 | tr H0W6W3 H0W6W3_CAVPO | Anamorsin OS=Cavia porcellus GN=CIAPIN1<br>PE=3 SV=1                        | CAVPO | 6 |



|      |      |      |       |       |       |                        |                                                                               |       |    |
|------|------|------|-------|-------|-------|------------------------|-------------------------------------------------------------------------------|-------|----|
| 1322 | 8.34 | 9.52 | 41.04 | 35.07 | 35.07 | tr H0V710 H0V710_CAVPO | Uncharacterized protein OS=Cavia porcellus<br>GN=SNCB PE=4 SV=1               | CAVPO | 13 |
| 1323 | 8.34 | 8.56 | 20.14 | 18.61 | 9.306 | tr H0VC67 H0VC67_CAVPO | Uncharacterized protein (Fragment) OS=Cavia<br>porcellus GN=SACM1L PE=4 SV=1  | CAVPO | 5  |
| 1324 | 8.34 | 8.41 | 67.12 | 67.12 | 48.63 | tr H0VG92 H0VG92_CAVPO | Uncharacterized protein (Fragment) OS=Cavia<br>porcellus GN=NDUFA12 PE=4 SV=1 | CAVPO | 5  |
| 1325 | 8.33 | 22.4 | 52.44 | 34.34 | 32.02 | tr H0VDQ3 H0VDQ3_CAVPO | Uncharacterized protein OS=Cavia porcellus<br>GN=SEPT11 PE=3 SV=1             | CAVPO | 13 |
| 1326 | 8.32 | 8.49 | 11.27 | 9.419 | 4.665 | tr H0UXH0 H0UXH0_CAVPO | Uncharacterized protein OS=Cavia porcellus<br>GN=MYO1B PE=4 SV=1              | CAVPO | 5  |
| 1327 | 8.32 | 8.35 | 36.52 | 26.97 | 23.03 | tr H0V1Z0 H0V1Z0_CAVPO | Uncharacterized protein (Fragment) OS=Cavia<br>porcellus GN=ARPC3 PE=4 SV=1   | CAVPO | 5  |
| 1328 | 8.32 | 8.54 | 11.51 | 9.637 | 6.884 | tr H0VDM6 H0VDM6_CAVPO | Integrin beta (Fragment) OS=Cavia porcellus<br>GN=ITGB1 PE=3 SV=1             | CAVPO | 5  |
| 1329 | 8.32 | 8.53 | 14.54 | 9.346 | 6.646 | tr H0VYB3 H0VYB3_CAVPO | Uncharacterized protein OS=Cavia porcellus<br>GN=IQSEC1 PE=4 SV=1             | CAVPO | 5  |
| 1330 | 8.3  | 8.43 | 45    | 27.5  | 22.86 | tr H0VQ33 H0VQ33_CAVPO | Uncharacterized protein (Fragment) OS=Cavia<br>porcellus GN=GTF2B PE=4 SV=1   | CAVPO | 5  |
| 1331 | 8.3  | 8.52 | 19.71 | 13.44 | 10.24 | tr H0VTQ5 H0VTQ5_CAVPO | Uncharacterized protein OS=Cavia porcellus<br>GN=Srrm1 PE=4 SV=1              | CAVPO | 6  |
| 1332 | 8.29 | 8.4  | 21.41 | 13.58 | 8.355 | tr H0V2I5 H0V2I5_CAVPO | Uncharacterized protein (Fragment) OS=Cavia<br>porcellus GN=PRKAR1A PE=4 SV=1 | CAVPO | 4  |
| 1333 | 8.29 | 8.53 | 18.32 | 18.32 | 8.972 | tr H0VSK1 H0VSK1_CAVPO | Uncharacterized protein OS=Cavia porcellus<br>GN=PDE1B PE=4 SV=1              | CAVPO | 4  |
| 1334 | 8.27 | 8.29 | 56.69 | 56.69 | 50.39 | tr H0V125 H0V125_CAVPO | Uncharacterized protein OS=Cavia porcellus<br>GN=NUTF2 PE=4 SV=1              | CAVPO | 5  |
| 1335 | 8.27 | 8.6  | 32.07 | 32.07 | 25.54 | tr H0VAS4 H0VAS4_CAVPO | Uncharacterized protein (Fragment) OS=Cavia<br>porcellus GN=CBX5 PE=4 SV=1    | CAVPO | 6  |

|      |      |      |       |       |       |                        |                                                                           |       |     |
|------|------|------|-------|-------|-------|------------------------|---------------------------------------------------------------------------|-------|-----|
| 1336 | 8.27 | 8.44 | 29.24 | 28.88 | 28.88 | tr H0VAZ7 H0VAZ7_CAVPO | Proteasome subunit beta type OS=Cavia porcellus GN=PSMB7 PE=3 SV=1        | CAVPO | 7   |
| 1337 | 8.26 | 8.28 | 27.68 | 27.68 | 27.68 | tr H0VJ27 H0VJ27_CAVPO | Uncharacterized protein OS=Cavia porcellus GN=Aqp1 PE=3 SV=1              | CAVPO | 6   |
| 1338 | 8.25 | 8.49 | 16.99 | 6.43  | 5.662 | tr H0VFF2 H0VFF2_CAVPO | Uncharacterized protein OS=Cavia porcellus GN=SKIV2L2 PE=4 SV=1           | CAVPO | 5   |
| 1339 | 8.24 | 8.37 | 9.894 | 8.14  | 4.195 | tr H0VFK8 H0VFK8_CAVPO | Uncharacterized protein (Fragment) OS=Cavia porcellus GN=SPHKAP PE=4 SV=1 | CAVPO | 4   |
| 1340 | 8.24 | 8.41 | 23.79 | 22.07 | 17.24 | tr H0VKV2 H0VKV2_CAVPO | Uncharacterized protein OS=Cavia porcellus GN=ERGIC1 PE=4 SV=1            | CAVPO | 5   |
| 1341 | 8.23 | 8.29 | 31.25 | 31.25 | 31.25 | tr H0W952 H0W952_CAVPO | Histone H2A OS=Cavia porcellus GN=H2AFZ PE=3 SV=1                         | CAVPO | 7   |
| 1342 | 8.22 | 83.8 | 82.66 | 79.95 | 79.05 | tr H0VKM7 H0VKM7_CAVPO | Uncharacterized protein OS=Cavia porcellus GN=TUBB PE=3 SV=1              | CAVPO | 130 |
| 1343 | 8.21 | 8.41 | 42.11 | 22.01 | 18.42 | tr H0UYD8 H0UYD8_CAVPO | Uncharacterized protein OS=Cavia porcellus GN=AP3M2 PE=4 SV=1             | CAVPO | 5   |
| 1344 | 8.2  | 8.31 | 8.761 | 4.855 | 3.571 | tr H0VFF6 H0VFF6_CAVPO | Uncharacterized protein OS=Cavia porcellus GN=LAMB2 PE=4 SV=1             | CAVPO | 5   |
| 1345 | 8.2  | 8.43 | 56.68 | 56.68 | 36.9  | tr H0VYF1 H0VYF1_CAVPO | Uncharacterized protein OS=Cavia porcellus GN=Dhfr PE=3 SV=1              | CAVPO | 6   |
| 1346 | 8.19 | 8.21 | 8.809 | 4.818 | 4.129 | tr H0VH71 H0VH71_CAVPO | Uncharacterized protein (Fragment) OS=Cavia porcellus GN=RPRD2 PE=4 SV=1  | CAVPO | 4   |
| 1347 | 8.19 | 8.21 | 54.79 | 43.84 | 38.36 | tr H0VJC4 H0VJC4_CAVPO | Uncharacterized protein OS=Cavia porcellus GN=MAGOH PE=4 SV=1             | CAVPO | 4   |
| 1348 | 8.17 | 8.62 | 38.91 | 38.91 | 29.18 | tr H0UX22 H0UX22_CAVPO | Uncharacterized protein (Fragment) OS=Cavia porcellus GN=ELAVL3 PE=4 SV=1 | CAVPO | 8   |
| 1349 | 8.17 | 8.41 | 31.44 | 21.26 | 17.37 | tr H0WA39 H0WA39_CAVPO | Uncharacterized protein OS=Cavia porcellus GN=MAP2K6 PE=4 SV=1            | CAVPO | 5   |

|      |      |      |       |       |       |                        |                                                                              |       |    |
|------|------|------|-------|-------|-------|------------------------|------------------------------------------------------------------------------|-------|----|
| 1350 | 8.16 | 8.26 | 47.49 | 36.31 | 36.31 | tr H0V9U7 H0V9U7_CAVPO | Uncharacterized protein OS=Cavia porcellus<br>GN=NDUFB9 PE=4 SV=1            | CAVPO | 9  |
| 1351 | 8.13 | 8.42 | 39.38 | 31.34 | 20.21 | tr H0UW14 H0UW14_CAVPO | Uncharacterized protein OS=Cavia porcellus<br>GN=PACSIN2 PE=4 SV=1           | CAVPO | 8  |
| 1352 | 8.13 | 16.6 | 30.76 | 20.45 | 16.52 | tr H0VEW1 H0VEW1_CAVPO | Uncharacterized protein OS=Cavia porcellus<br>GN=PABPC4 PE=4 SV=1            | CAVPO | 12 |
| 1353 | 8.12 | 8.19 | 32.85 | 25.91 | 19.71 | tr H0VWE9 H0VWE9_CAVPO | Uncharacterized protein OS=Cavia porcellus<br>GN=CNPY3 PE=4 SV=1             | CAVPO | 4  |
| 1354 | 8.11 | 8.12 | 44.55 | 38.61 | 36.63 | tr H0UYB7 H0UYB7_CAVPO | Uncharacterized protein OS=Cavia porcellus<br>GN=Hmg1n1 PE=4 SV=1            | CAVPO | 10 |
| 1355 | 8.11 | 12.6 | 32.91 | 29.14 | 18.87 | tr H0V0V4 H0V0V4_CAVPO | Uncharacterized protein OS=Cavia porcellus<br>GN=SEPT4 PE=3 SV=1             | CAVPO | 8  |
| 1356 | 8.1  | 8.11 | 15.35 | 15.35 | 13.54 | tr H0VEW2 H0VEW2_CAVPO | Uncharacterized protein (Fragment) OS=Cavia<br>porcellus GN=SRSF11 PE=4 SV=1 | CAVPO | 4  |
| 1357 | 8.1  | 8.19 | 26.89 | 23.28 | 20.33 | tr H0W341 H0W341_CAVPO | Uncharacterized protein OS=Cavia porcellus<br>GN=RNPS1 PE=4 SV=1             | CAVPO | 4  |
| 1358 | 8.09 | 8.2  | 19.04 | 13.04 | 10.34 | tr H0VA19 H0VA19_CAVPO | Reticulon (Fragment) OS=Cavia porcellus<br>GN=RTN1 PE=4 SV=1                 | CAVPO | 5  |
| 1359 | 8.09 | 8.33 | 12.96 | 8.83  | 6.237 | tr H0VK50 H0VK50_CAVPO | Uncharacterized protein OS=Cavia porcellus<br>GN=CASKIN1 PE=4 SV=1           | CAVPO | 6  |
| 1360 | 8.07 | 8.2  | 11.41 | 11.41 | 11.41 | tr H0UUW7 H0UUW7_CAVPO | Uncharacterized protein (Fragment) OS=Cavia<br>porcellus GN=Zfr PE=4 SV=1    | CAVPO | 5  |
| 1361 | 8.07 | 8.19 | 21.8  | 19.89 | 13    | tr H0VE88 H0VE88_CAVPO | Uncharacterized protein OS=Cavia porcellus<br>GN=NPEPL1 PE=4 SV=1            | CAVPO | 4  |
| 1362 | 8.07 | 8.29 | 11.94 | 9.336 | 5.655 | tr H0VLV8 H0VLV8_CAVPO | Uncharacterized protein OS=Cavia porcellus<br>GN=SLC4A10 PE=4 SV=1           | CAVPO | 5  |
| 1363 | 8.07 | 8.27 | 11.01 | 9.748 | 5.241 | tr H0VS78 H0VS78_CAVPO | Uncharacterized protein OS=Cavia porcellus<br>GN=EML4 PE=4 SV=1              | CAVPO | 5  |

|      |      |      |       |       |       |                        |                                                                                |       |   |
|------|------|------|-------|-------|-------|------------------------|--------------------------------------------------------------------------------|-------|---|
| 1364 | 8.07 | 8.08 | 28.96 | 28.96 | 23.98 | tr H0VX01 H0VX01_CAVPO | Uncharacterized protein OS=Cavia porcellus<br>GN=RAB28 PE=4 SV=1               | CAVPO | 4 |
| 1365 | 8.06 | 8.17 | 35.24 | 35.24 | 18.57 | tr H0V831 H0V831_CAVPO | Uncharacterized protein (Fragment) OS=Cavia<br>porcellus GN=THYN1 PE=4 SV=1    | CAVPO | 4 |
| 1366 | 8.06 | 8.06 | 25.76 | 18.94 | 18.94 | tr H0WAP2 H0WAP2_CAVPO | Uncharacterized protein OS=Cavia porcellus<br>GN=COPS7B PE=4 SV=1              | CAVPO | 4 |
| 1367 | 8.05 | 8.25 | 20.91 | 17.94 | 12.72 | tr H0UVF4 H0UVF4_CAVPO | Uncharacterized protein OS=Cavia porcellus<br>GN=NT5E PE=3 SV=1                | CAVPO | 5 |
| 1368 | 8.05 | 8.13 | 30.73 | 30.45 | 17.6  | tr H0VXH1 H0VXH1_CAVPO | Uncharacterized protein OS=Cavia porcellus<br>GN=TOMM40 PE=4 SV=1              | CAVPO | 5 |
| 1369 | 8.04 | 8.14 | 13.36 | 10.33 | 8.54  | tr H0VQI6 H0VQI6_CAVPO | Uncharacterized protein OS=Cavia porcellus<br>GN=NHLRC2 PE=4 SV=1              | CAVPO | 4 |
| 1370 | 8.03 | 8.03 | 37.14 | 30.71 | 30.71 | tr H0UU38 H0UU38_CAVPO | Profilin OS=Cavia porcellus GN=PFN2 PE=3<br>SV=1                               | CAVPO | 7 |
| 1371 | 8.02 | 8.33 | 39.68 | 24.87 | 24.87 | tr H0UY97 H0UY97_CAVPO | Uncharacterized protein OS=Cavia porcellus<br>GN=NDUFB5 PE=4 SV=1              | CAVPO | 5 |
| 1372 | 8.01 | 8.01 | 56.25 | 48.21 | 48.21 | tr H0V0G6 H0V0G6_CAVPO | Uncharacterized protein (Fragment) OS=Cavia<br>porcellus GN=TCEB1 PE=4 SV=1    | CAVPO | 5 |
| 1373 | 8    | 10   | 36.76 | 32.43 | 32.43 | tr H0UTV1 H0UTV1_CAVPO | Uncharacterized protein (Fragment) OS=Cavia<br>porcellus GN=RAB35 PE=3 SV=1    | CAVPO | 8 |
| 1374 | 8    | 8    | 38.46 | 38.46 | 38.46 | tr H0UUN4 H0UUN4_CAVPO | Uncharacterized protein (Fragment) OS=Cavia<br>porcellus GN=ATP6V1G1 PE=4 SV=1 | CAVPO | 4 |
| 1375 | 8    | 8    | 20.08 | 20.08 | 16.32 | tr H0UW91 H0UW91_CAVPO | Proteasome subunit beta type OS=Cavia<br>porcellus GN=Psm6 PE=3 SV=1           | CAVPO | 5 |
| 1376 | 8    | 8    | 21.13 | 21.13 | 21.13 | tr H0V0G9 H0V0G9_CAVPO | Uncharacterized protein OS=Cavia porcellus<br>GN=CDIPT PE=3 SV=1               | CAVPO | 4 |
| 1377 | 8    | 8    | 36.52 | 23.91 | 23.91 | tr H0V511 H0V511_CAVPO | Uncharacterized protein (Fragment) OS=Cavia<br>porcellus GN=HDHD1 PE=4 SV=1    | CAVPO | 4 |

|      |      |      |       |       |       |                        |                                                                              |       |    |
|------|------|------|-------|-------|-------|------------------------|------------------------------------------------------------------------------|-------|----|
| 1378 | 8    | 14   | 47.22 | 38.89 | 38.89 | tr H0VIM0 H0VIM0_CAVPO | Uncharacterized protein OS=Cavia porcellus<br>GN=RAB5C PE=3 SV=1             | CAVPO | 11 |
| 1379 | 8    | 8    | 71.43 | 71.43 | 71.43 | tr H0VKR7 H0VKR7_CAVPO | Uncharacterized protein OS=Cavia porcellus<br>GN=HSBP1 PE=4 SV=1             | CAVPO | 5  |
| 1380 | 8    | 8.01 | 28.72 | 19.15 | 19.15 | tr H0VNF6 H0VNF6_CAVPO | Uncharacterized protein OS=Cavia porcellus<br>GN=ARL6IP5 PE=4 SV=1           | CAVPO | 4  |
| 1381 | 8    | 17.2 | 26.44 | 25.96 | 18.27 | tr H0VNV3 H0VNV3_CAVPO | Uncharacterized protein OS=Cavia porcellus<br>GN=UBQLN2 PE=4 SV=1            | CAVPO | 11 |
| 1382 | 8    | 8    | 42.02 | 34.45 | 34.45 | tr H0VYC9 H0VYC9_CAVPO | V-type proton ATPase subunit F OS=Cavia<br>porcellus GN=ATP6V1F PE=3 SV=1    | CAVPO | 4  |
| 1383 | 8    | 14   | 42.79 | 42.33 | 42.33 | tr H0VYQ5 H0VYQ5_CAVPO | Uncharacterized protein OS=Cavia porcellus<br>GN=RAB5B PE=3 SV=1             | CAVPO | 11 |
| 1384 | 8    | 8    | 16.08 | 16.08 | 13.05 | tr H0W3E8 H0W3E8_CAVPO | Uncharacterized protein OS=Cavia porcellus<br>GN=SLC37A4 PE=4 SV=1           | CAVPO | 5  |
| 1385 | 7.98 | 8.14 | 11.95 | 11.5  | 8.623 | tr H0V2K6 H0V2K6_CAVPO | Uncharacterized protein OS=Cavia porcellus<br>GN=GGT7 PE=4 SV=1              | CAVPO | 5  |
| 1386 | 7.97 | 8.14 | 44.96 | 44.19 | 44.19 | tr H0UZ85 H0UZ85_CAVPO | Uncharacterized protein OS=Cavia porcellus<br>GN=COX5B PE=4 SV=1             | CAVPO | 5  |
| 1387 | 7.96 | 8.05 | 47.06 | 47.06 | 47.06 | tr H0UT30 H0UT30_CAVPO | Uncharacterized protein (Fragment) OS=Cavia<br>porcellus GN=PTGES3 PE=4 SV=1 | CAVPO | 7  |
| 1388 | 7.94 | 8.04 | 42.96 | 42.96 | 42.22 | tr H0VFE1 H0VFE1_CAVPO | Uncharacterized protein OS=Cavia porcellus<br>GN=CISD2 PE=4 SV=1             | CAVPO | 5  |
| 1389 | 7.93 | 8    | 34.75 | 32.05 | 18.53 | tr H0UTW8 H0UTW8_CAVPO | Uncharacterized protein OS=Cavia porcellus<br>GN=BPGM PE=3 SV=1              | CAVPO | 4  |
| 1390 | 7.92 | 8.32 | 14.16 | 6.952 | 3.635 | tr H0V5J7 H0V5J7_CAVPO | Uncharacterized protein OS=Cavia porcellus<br>GN=SMARCA2 PE=4 SV=1           | CAVPO | 5  |
| 1391 | 7.9  | 7.98 | 14.69 | 10.19 | 10.19 | tr H0UYS3 H0UYS3_CAVPO | Uncharacterized protein (Fragment) OS=Cavia<br>porcellus GN=PAIP1 PE=4 SV=1  | CAVPO | 4  |

|      |      |      |       |       |       |                        |                                                                                |       |   |
|------|------|------|-------|-------|-------|------------------------|--------------------------------------------------------------------------------|-------|---|
| 1392 | 7.9  | 10.6 | 15.08 | 11.9  | 6.689 | tr H0VJP1 H0VJP1_CAVPO | Uncharacterized protein OS=Cavia porcellus<br>GN=U2SURP PE=4 SV=1              | CAVPO | 5 |
| 1393 | 7.88 | 7.94 | 46.94 | 46.94 | 37.76 | tr H0VSP9 H0VSP9_CAVPO | Uncharacterized protein (Fragment) OS=Cavia<br>porcellus GN=COX6B1 PE=4 SV=1   | CAVPO | 4 |
| 1394 | 7.88 | 7.97 | 34.19 | 34.19 | 34.19 | tr H0W111 H0W111_CAVPO | Uncharacterized protein (Fragment) OS=Cavia<br>porcellus PE=4 SV=1             | CAVPO | 9 |
| 1395 | 7.85 | 8.07 | 32.75 | 16.37 | 16.37 | tr H0V3U6 H0V3U6_CAVPO | Uncharacterized protein (Fragment) OS=Cavia<br>porcellus GN=ACAA2 PE=3 SV=1    | CAVPO | 5 |
| 1396 | 7.85 | 7.98 | 24.25 | 21.26 | 20.66 | tr H0VLG8 H0VLG8_CAVPO | Uncharacterized protein (Fragment) OS=Cavia<br>porcellus GN=NDRG4 PE=4 SV=1    | CAVPO | 5 |
| 1397 | 7.84 | 7.9  | 72.29 | 57.83 | 57.83 | tr H0UXF6 H0UXF6_CAVPO | 40S ribosomal protein S21 OS=Cavia porcellus<br>GN=RPS21 PE=3 SV=1             | CAVPO | 4 |
| 1398 | 7.84 | 14.5 | 47.1  | 43.12 | 43.12 | tr H0V5Y4 H0V5Y4_CAVPO | Uncharacterized protein OS=Cavia porcellus<br>GN=GNPDA2 PE=3 SV=1              | CAVPO | 8 |
| 1399 | 7.83 | 7.9  | 33    | 26.33 | 20.33 | tr H0UVF1 H0UVF1_CAVPO | Uncharacterized protein OS=Cavia porcellus<br>GN=ECHDC3 PE=4 SV=1              | CAVPO | 4 |
| 1400 | 7.83 | 7.93 | 44.77 | 29.07 | 29.07 | tr H0V3V4 H0V3V4_CAVPO | Uncharacterized protein (Fragment) OS=Cavia<br>porcellus GN=RAB21 PE=4 SV=1    | CAVPO | 5 |
| 1401 | 7.82 | 9.23 | 15.6  | 12.84 | 11.21 | tr H0VKR3 H0VKR3_CAVPO | Uncharacterized protein (Fragment) OS=Cavia<br>porcellus GN=CACNA2D1 PE=4 SV=1 | CAVPO | 8 |
| 1402 | 7.82 | 7.93 | 28.7  | 22.83 | 11.96 | tr H0VX18 H0VX18_CAVPO | Uncharacterized protein OS=Cavia porcellus<br>GN=DCTN4 PE=4 SV=1               | CAVPO | 4 |
| 1403 | 7.82 | 7.87 | 28.04 | 26.46 | 23.28 | tr H0W5E6 H0W5E6_CAVPO | Uncharacterized protein OS=Cavia porcellus<br>GN=PDCD6 PE=4 SV=1               | CAVPO | 4 |
| 1404 | 7.82 | 7.89 | 49.15 | 48.31 | 48.31 | tr H0WCU0 H0WCU0_CAVPO | Uncharacterized protein OS=Cavia porcellus<br>GN=ATP6V1G2 PE=4 SV=1            | CAVPO | 4 |
| 1405 | 7.8  | 8.44 | 24.36 | 20.1  | 10.4  | tr H0V4T6 H0V4T6_CAVPO | Uncharacterized protein OS=Cavia porcellus<br>GN=GART PE=3 SV=1                | CAVPO | 7 |

|      |      |      |       |       |       |                        |                                                                              |       |    |
|------|------|------|-------|-------|-------|------------------------|------------------------------------------------------------------------------|-------|----|
| 1406 | 7.8  | 7.86 | 57.3  | 57.3  | 57.3  | tr H0VST6 H0VST6_CAVPO | Uncharacterized protein OS=Cavia porcellus<br>GN=DYNLL2 PE=4 SV=1            | CAVPO | 6  |
| 1407 | 7.78 | 7.87 | 34.96 | 32.52 | 28.86 | tr H0VIW3 H0VIW3_CAVPO | Uncharacterized protein OS=Cavia porcellus<br>GN=IAH1 PE=4 SV=1              | CAVPO | 6  |
| 1408 | 7.77 | 7.89 | 23.37 | 23.37 | 13.03 | tr H0VM03 H0VM03_CAVPO | Uncharacterized protein OS=Cavia porcellus<br>GN=WBP2 PE=4 SV=1              | CAVPO | 4  |
| 1409 | 7.77 | 7.95 | 20.47 | 10.68 | 8.902 | tr H0W6T1 H0W6T1_CAVPO | Uncharacterized protein OS=Cavia porcellus<br>GN=Soga3 PE=4 SV=1             | CAVPO | 5  |
| 1410 | 7.76 | 7.86 | 53.6  | 39.2  | 39.2  | tr H0VBD9 H0VBD9_CAVPO | Uncharacterized protein OS=Cavia porcellus<br>GN=LOC100716657 PE=4 SV=1      | CAVPO | 4  |
| 1411 | 7.75 | 8.09 | 26.73 | 26.07 | 17.82 | tr H0V7G4 H0V7G4_CAVPO | Uncharacterized protein OS=Cavia porcellus<br>GN=MTCH2 PE=3 SV=1             | CAVPO | 4  |
| 1412 | 7.75 | 8.68 | 31.66 | 16.56 | 11.11 | tr H0WA52 H0WA52_CAVPO | Uncharacterized protein (Fragment) OS=Cavia<br>porcellus PE=4 SV=1           | CAVPO | 4  |
| 1413 | 7.74 | 7.95 | 50.34 | 42.95 | 36.91 | tr H0VID0 H0VID0_CAVPO | Stathmin OS=Cavia porcellus GN=STMN1<br>PE=3 SV=1                            | CAVPO | 9  |
| 1414 | 7.72 | 11.9 | 51.35 | 50.9  | 50.9  | tr H0WC22 H0WC22_CAVPO | Uncharacterized protein OS=Cavia porcellus<br>GN=HNRNPA0 PE=4 SV=1           | CAVPO | 10 |
| 1415 | 7.71 | 7.81 | 44.88 | 44.88 | 44.88 | tr H0UTB0 H0UTB0_CAVPO | Uncharacterized protein OS=Cavia porcellus<br>GN=PDCD5 PE=4 SV=1             | CAVPO | 5  |
| 1416 | 7.71 | 7.88 | 44.69 | 44.69 | 31.84 | tr H0W439 H0W439_CAVPO | Uncharacterized protein (Fragment) OS=Cavia<br>porcellus GN=HIBADH PE=4 SV=1 | CAVPO | 4  |
| 1417 | 7.7  | 7.86 | 19.69 | 13.18 | 11.3  | tr H0V5U9 H0V5U9_CAVPO | Uncharacterized protein OS=Cavia porcellus<br>GN=NUDCD1 PE=4 SV=1            | CAVPO | 5  |
| 1418 | 7.69 | 7.82 | 27.7  | 16.54 | 10.22 | tr H0VFN5 H0VFN5_CAVPO | Uncharacterized protein (Fragment) OS=Cavia<br>porcellus GN=Bco2 PE=3 SV=1   | CAVPO | 4  |
| 1419 | 7.69 | 16.7 | 69.06 | 65.75 | 62.43 | tr H0WBX9 H0WBX9_CAVPO | Uncharacterized protein OS=Cavia porcellus<br>GN=ARF1 PE=3 SV=1              | CAVPO | 12 |

|      |      |      |       |       |       |                        |                                                                                |       |    |
|------|------|------|-------|-------|-------|------------------------|--------------------------------------------------------------------------------|-------|----|
| 1420 | 7.68 | 7.91 | 12.6  | 4.452 | 3.163 | tr H0UUI8 H0UUI8_CAVPO | Uncharacterized protein OS=Cavia porcellus<br>GN=ITSN1 PE=4 SV=1               | CAVPO | 6  |
| 1421 | 7.68 | 8.04 | 39.25 | 32.26 | 27.42 | tr H0UWG1 H0UWG1_CAVPO | Uncharacterized protein OS=Cavia porcellus<br>GN=DCTN3 PE=4 SV=1               | CAVPO | 6  |
| 1422 | 7.68 | 7.75 | 31.68 | 31.68 | 28.71 | tr H0VP56 H0VP56_CAVPO | Uncharacterized protein (Fragment) OS=Cavia<br>porcellus GN=PAFAH1B2 PE=4 SV=1 | CAVPO | 5  |
| 1423 | 7.68 | 7.74 | 18.22 | 18.22 | 18.22 | tr H0VTW9 H0VTW9_CAVPO | Uncharacterized protein (Fragment) OS=Cavia<br>porcellus GN=PLP1 PE=4 SV=1     | CAVPO | 4  |
| 1424 | 7.67 | 7.73 | 47.66 | 47.66 | 39.84 | tr H0VWD0 H0VWD0_CAVPO | Uncharacterized protein (Fragment) OS=Cavia<br>porcellus GN=NHP2L1 PE=4 SV=1   | CAVPO | 6  |
| 1425 | 7.66 | 7.72 | 26.1  | 22.89 | 22.89 | tr H0VY54 H0VY54_CAVPO | Uncharacterized protein (Fragment) OS=Cavia<br>porcellus GN=EIF4H PE=4 SV=1    | CAVPO | 5  |
| 1426 | 7.65 | 7.78 | 25.64 | 19.35 | 13.75 | tr H0W1C6 H0W1C6_CAVPO | Uncharacterized protein OS=Cavia porcellus<br>GN=SCCPDH PE=4 SV=1              | CAVPO | 6  |
| 1427 | 7.63 | 7.83 | 27.43 | 22.15 | 13.92 | tr H0VTI7 H0VTI7_CAVPO | Methionine aminopeptidase 2 OS=Cavia<br>porcellus GN=METAP2 PE=3 SV=1          | CAVPO | 4  |
| 1428 | 7.62 | 9.91 | 14.41 | 13.52 | 9.955 | tr H0UZF0 H0UZF0_CAVPO | Uncharacterized protein (Fragment) OS=Cavia<br>porcellus GN=C2CD2 PE=4 SV=1    | CAVPO | 5  |
| 1429 | 7.62 | 7.68 | 37.5  | 37.5  | 37.5  | tr H0VLD8 H0VLD8_CAVPO | Uncharacterized protein OS=Cavia porcellus<br>GN=CHCHD2 PE=4 SV=1              | CAVPO | 6  |
| 1430 | 7.61 | 7.91 | 11.28 | 5.367 | 5.367 | tr H0V265 H0V265_CAVPO | Uncharacterized protein (Fragment) OS=Cavia<br>porcellus GN=NUP153 PE=4 SV=1   | CAVPO | 5  |
| 1431 | 7.6  | 7.66 | 24.54 | 24.54 | 24.54 | tr H0UWL2 H0UWL2_CAVPO | Uncharacterized protein (Fragment) OS=Cavia<br>porcellus GN=GSTZ1 PE=3 SV=1    | CAVPO | 4  |
| 1432 | 7.6  | 32.8 | 26.38 | 20.85 | 20.05 | tr H0UY82 H0UY82_CAVPO | Uncharacterized protein OS=Cavia porcellus<br>GN=DNM2 PE=3 SV=1                | CAVPO | 17 |
| 1433 | 7.59 | 7.85 | 10.74 | 10.74 | 2.625 | tr H0V5N6 H0V5N6_CAVPO | Uncharacterized protein OS=Cavia porcellus<br>GN=L1CAM PE=4 SV=1               | CAVPO | 3  |



|      |      |      |       |       |       |                        |                                                                             |       |    |
|------|------|------|-------|-------|-------|------------------------|-----------------------------------------------------------------------------|-------|----|
| 1434 | 7.59 | 7.76 | 20.46 | 20.46 | 20.46 | tr H0V7V7 H0V7V7_CAVPO | Uncharacterized protein OS=Cavia porcellus<br>GN=DKK3 PE=4 SV=1             | CAVPO | 6  |
| 1435 | 7.59 | 10.1 | 27.59 | 18.63 | 12.5  | tr H0VGX4 H0VGX4_CAVPO | Uncharacterized protein (Fragment) OS=Cavia<br>porcellus GN=BZW1 PE=4 SV=1  | CAVPO | 6  |
| 1436 | 7.57 | 7.94 | 35.76 | 35.1  | 30.46 | tr H0V2M1 H0V2M1_CAVPO | Uncharacterized protein (Fragment) OS=Cavia<br>porcellus GN=GMFB PE=4 SV=1  | CAVPO | 4  |
| 1437 | 7.57 | 7.69 | 19.16 | 19.16 | 17.69 | tr H0VZ48 H0VZ48_CAVPO | Uncharacterized protein OS=Cavia porcellus<br>GN=SERBP1 PE=4 SV=1           | CAVPO | 6  |
| 1438 | 7.53 | 7.72 | 16.76 | 11.81 | 8.791 | tr H0UVL9 H0UVL9_CAVPO | Uncharacterized protein OS=Cavia porcellus<br>GN=GOLGA5 PE=4 SV=1           | CAVPO | 5  |
| 1439 | 7.52 | 7.58 | 35.8  | 26.85 | 22.22 | tr H0VT30 H0VT30_CAVPO | Uncharacterized protein (Fragment) OS=Cavia<br>porcellus GN=NIT1 PE=4 SV=1  | CAVPO | 4  |
| 1440 | 7.52 | 16.4 | 47.5  | 40    | 31.5  | tr H0VU84 H0VU84_CAVPO | Uncharacterized protein OS=Cavia porcellus<br>GN=MAP2K2 PE=4 SV=1           | CAVPO | 11 |
| 1441 | 7.5  | 7.67 | 39.17 | 39.17 | 39.17 | tr H0V5B6 H0V5B6_CAVPO | Uncharacterized protein OS=Cavia porcellus<br>GN=EIF4E PE=3 SV=1            | CAVPO | 6  |
| 1442 | 7.5  | 7.71 | 47.98 | 42.42 | 42.42 | tr H0V7K0 H0V7K0_CAVPO | Uncharacterized protein OS=Cavia porcellus<br>GN=Jar1a PE=3 SV=1            | CAVPO | 6  |
| 1443 | 7.5  | 7.67 | 35.96 | 35.96 | 35.96 | tr H0VHA1 H0VHA1_CAVPO | Uncharacterized protein OS=Cavia porcellus<br>GN=PCNP PE=4 SV=1             | CAVPO | 5  |
| 1444 | 7.48 | 10.2 | 35.51 | 24.28 | 22.1  | tr H0WAN7 H0WAN7_CAVPO | Uncharacterized protein (Fragment) OS=Cavia<br>porcellus GN=PURB PE=4 SV=1  | CAVPO | 8  |
| 1445 | 7.46 | 8.15 | 34.16 | 27.57 | 23.87 | tr H0UT76 H0UT76_CAVPO | Uncharacterized protein OS=Cavia porcellus<br>GN=CAPNS1 PE=4 SV=1           | CAVPO | 6  |
| 1446 | 7.45 | 7.74 | 11.63 | 9.412 | 7.582 | tr H0VBT0 H0VBT0_CAVPO | Uncharacterized protein (Fragment) OS=Cavia<br>porcellus GN=NSUN2 PE=4 SV=1 | CAVPO | 6  |
| 1447 | 7.45 | 7.63 | 30.3  | 16.76 | 11.41 | tr H0VFZ9 H0VFZ9_CAVPO | Uncharacterized protein OS=Cavia porcellus<br>GN=TBC1D24 PE=4 SV=1          | CAVPO | 4  |

|      |      |      |       |       |       |                        |                                                                               |       |   |
|------|------|------|-------|-------|-------|------------------------|-------------------------------------------------------------------------------|-------|---|
| 1448 | 7.44 | 7.54 | 39.36 | 39.36 | 24.1  | tr H0UZ10 H0UZ10_CAVPO | Uncharacterized protein OS=Cavia porcellus<br>GN=EMD PE=4 SV=1                | CAVPO | 4 |
| 1449 | 7.44 | 9.26 | 40.37 | 27.52 | 18.35 | tr H0VR14 H0VR14_CAVPO | Uncharacterized protein (Fragment) OS=Cavia<br>porcellus GN=VPS26A PE=4 SV=1  | CAVPO | 5 |
| 1450 | 7.43 | 7.63 | 52.76 | 47.24 | 47.24 | tr H0UTW5 H0UTW5_CAVPO | Uncharacterized protein OS=Cavia porcellus<br>GN=HINT2 PE=4 SV=1              | CAVPO | 5 |
| 1451 | 7.42 | 9.72 | 45.25 | 29.61 | 27.37 | tr H0UUA3 H0UUA3_CAVPO | Uncharacterized protein OS=Cavia porcellus<br>GN=HMGB3 PE=4 SV=1              | CAVPO | 6 |
| 1452 | 7.42 | 9.75 | 13.84 | 13.65 | 13.65 | tr H0VB23 H0VB23_CAVPO | Uncharacterized protein OS=Cavia porcellus<br>GN=CELF1 PE=4 SV=1              | CAVPO | 6 |
| 1453 | 7.42 | 7.65 | 20.97 | 10.56 | 10.56 | tr H0VCA8 H0VCA8_CAVPO | Uncharacterized protein OS=Cavia porcellus<br>GN=TM9SF2 PE=4 SV=1             | CAVPO | 5 |
| 1454 | 7.42 | 7.76 | 29.13 | 29.13 | 11.76 | tr H0VUT1 H0VUT1_CAVPO | Uncharacterized protein OS=Cavia porcellus<br>GN=Sord PE=3 SV=1               | CAVPO | 3 |
| 1455 | 7.41 | 7.67 | 20.62 | 17.16 | 8.492 | tr H0UW47 H0UW47_CAVPO | Uncharacterized protein (Fragment) OS=Cavia<br>porcellus GN=SCAI PE=4 SV=1    | CAVPO | 4 |
| 1456 | 7.41 | 7.49 | 12    | 5.767 | 5.767 | tr H0VRI2 H0VRI2_CAVPO | Uncharacterized protein (Fragment) OS=Cavia<br>porcellus GN=GRAMD1B PE=4 SV=1 | CAVPO | 4 |
| 1457 | 7.39 | 7.58 | 33.89 | 33.89 | 25    | tr H0V7I2 H0V7I2_CAVPO | Uncharacterized protein OS=Cavia porcellus<br>GN=SEH1L PE=4 SV=1              | CAVPO | 5 |
| 1458 | 7.39 | 7.56 | 24.76 | 16.04 | 16.04 | tr H0VBY6 H0VBY6_CAVPO | Uncharacterized protein OS=Cavia porcellus<br>GN=SF3B4 PE=4 SV=1              | CAVPO | 5 |
| 1459 | 7.39 | 7.55 | 38.89 | 37.96 | 37.96 | tr H0W9E6 H0W9E6_CAVPO | Uncharacterized protein OS=Cavia porcellus<br>GN=HMGA1 PE=4 SV=1              | CAVPO | 6 |
| 1460 | 7.38 | 10.9 | 29.8  | 26.65 | 17.77 | tr H0VCD1 H0VCD1_CAVPO | Uncharacterized protein (Fragment) OS=Cavia<br>porcellus GN=CSNK2A2 PE=4 SV=1 | CAVPO | 7 |
| 1461 | 7.36 | 7.41 | 28.39 | 28.39 | 28.39 | tr H0VGF6 H0VGF6_CAVPO | Uncharacterized protein OS=Cavia porcellus<br>GN=CD81 PE=4 SV=1               | CAVPO | 6 |

|      |      |      |       |       |       |                        |                                                                           |       |   |
|------|------|------|-------|-------|-------|------------------------|---------------------------------------------------------------------------|-------|---|
| 1462 | 7.36 | 7.52 | 56.36 | 48.18 | 48.18 | tr H0VKV6 H0VKV6_CAVPO | Uncharacterized protein (Fragment) OS=Cavia porcellus GN=TBCEA PE=4 SV=1  | CAVPO | 5 |
| 1463 | 7.34 | 7.49 | 12.17 | 10.48 | 3.858 | tr H0V3X6 H0V3X6_CAVPO | Uncharacterized protein OS=Cavia porcellus GN=PRPF4B PE=4 SV=1            | CAVPO | 3 |
| 1464 | 7.34 | 7.53 | 47.62 | 42.86 | 42.86 | tr H0WCE5 H0WCE5_CAVPO | Uncharacterized protein OS=Cavia porcellus GN=ATP5D PE=3 SV=1             | CAVPO | 8 |
| 1465 | 7.33 | 7.48 | 11.54 | 8.115 | 6.444 | tr H0VLU1 H0VLU1_CAVPO | Uncharacterized protein (Fragment) OS=Cavia porcellus GN=ZC3H4 PE=4 SV=1  | CAVPO | 4 |
| 1466 | 7.3  | 7.39 | 11.89 | 8.223 | 6.902 | tr H0V3A8 H0V3A8_CAVPO | Uncharacterized protein OS=Cavia porcellus GN=NOLC1 PE=4 SV=1             | CAVPO | 4 |
| 1467 | 7.3  | 7.49 | 10.5  | 8.255 | 5.778 | tr H0VLK1 H0VLK1_CAVPO | Uncharacterized protein (Fragment) OS=Cavia porcellus GN=TMTC3 PE=4 SV=1  | CAVPO | 4 |
| 1468 | 7.3  | 7.76 | 9.034 | 5.1   | 2.574 | tr H0W5W2 H0W5W2_CAVPO | Uncharacterized protein (Fragment) OS=Cavia porcellus GN=PI4KA PE=4 SV=1  | CAVPO | 4 |
| 1469 | 7.29 | 7.4  | 34.23 | 27.31 | 18.85 | tr H0UVD4 H0UVD4_CAVPO | Uncharacterized protein (Fragment) OS=Cavia porcellus GN=AUH PE=3 SV=1    | CAVPO | 5 |
| 1470 | 7.28 | 7.34 | 20.49 | 15.03 | 15.03 | tr H0UZX7 H0UZX7_CAVPO | Uncharacterized protein (Fragment) OS=Cavia porcellus GN=ATAD1 PE=3 SV=1  | CAVPO | 4 |
| 1471 | 7.28 | 7.58 | 34.36 | 31.84 | 24.3  | tr H0V772 H0V772_CAVPO | Uncharacterized protein (Fragment) OS=Cavia porcellus GN=SMS PE=3 SV=1    | CAVPO | 6 |
| 1472 | 7.28 | 7.41 | 34.4  | 24    | 24    | tr H0VNE6 H0VNE6_CAVPO | Uncharacterized protein (Fragment) OS=Cavia porcellus GN=Rps25 PE=4 SV=1  | CAVPO | 4 |
| 1473 | 7.28 | 10.7 | 16.06 | 10.24 | 3.455 | tr H0VNU5 H0VNU5_CAVPO | Uncharacterized protein (Fragment) OS=Cavia porcellus GN=EIF4G3 PE=4 SV=1 | CAVPO | 5 |
| 1474 | 7.28 | 7.35 | 44.34 | 38.68 | 38.68 | tr H0VUH9 H0VUH9_CAVPO | Uncharacterized protein OS=Cavia porcellus GN=GLRX PE=4 SV=1              | CAVPO | 5 |
| 1475 | 7.28 | 7.44 | 46.43 | 38.69 | 30.95 | tr H0WDA3 H0WDA3_CAVPO | Uncharacterized protein (Fragment) OS=Cavia porcellus GN=ARPC4 PE=4 SV=1  | CAVPO | 4 |

|      |      |      |       |       |       |                        |                                                                                                      |       |    |
|------|------|------|-------|-------|-------|------------------------|------------------------------------------------------------------------------------------------------|-------|----|
| 1476 | 7.25 | 7.46 | 15.01 | 13.79 | 11.76 | tr H0V4N5 H0V4N5_CAVPO | Uncharacterized protein (Fragment) OS=Cavia porcellus GN=BBS4 PE=4 SV=1                              | CAVPO | 5  |
| 1477 | 7.23 | 10.2 | 48.78 | 48.17 | 35.98 | tr H0V1J4 H0V1J4_CAVPO | Uncharacterized protein OS=Cavia porcellus GN=SRSF3 PE=4 SV=1                                        | CAVPO | 11 |
| 1478 | 7.22 | 7.36 | 34.76 | 30    | 30    | tr H0UWN2 H0UWN2_CAVPO | Uncharacterized protein OS=Cavia porcellus GN=COPS8 PE=4 SV=1                                        | CAVPO | 4  |
| 1479 | 7.22 | 7.28 | 19.65 | 18.16 | 14.68 | tr H0VYB4 H0VYB4_CAVPO | Uncharacterized protein OS=Cavia porcellus GN=DAZAP1 PE=4 SV=1                                       | CAVPO | 4  |
| 1480 | 7.21 | 7.38 | 30.94 | 25.9  | 14.03 | tr H0VTC7 H0VTC7_CAVPO | Uncharacterized protein OS=Cavia porcellus GN=TMX1 PE=4 SV=1                                         | CAVPO | 3  |
| 1481 | 7.2  | 7.39 | 35.33 | 19.94 | 7.692 | tr H0WDT4 H0WDT4_CAVPO | Uncharacterized protein (Fragment) OS=Cavia porcellus GN=PPP1R8 PE=4 SV=1                            | CAVPO | 3  |
| 1482 | 7.19 | 7.38 | 9.923 | 7.186 | 4.705 | tr H0V898 H0V898_CAVPO | Uncharacterized protein (Fragment) OS=Cavia porcellus GN=ANKFY1 PE=4 SV=1                            | CAVPO | 4  |
| 1483 | 7.19 | 7.39 | 65.67 | 51.49 | 47.76 | tr H0VX49 H0VX49_CAVPO | Uncharacterized protein OS=Cavia porcellus GN=CPLX2 PE=4 SV=1                                        | CAVPO | 4  |
| 1484 | 7.19 | 7.36 | 27.17 | 27.17 | 23.37 | tr H0W9Z7 H0W9Z7_CAVPO | Uncharacterized protein OS=Cavia porcellus GN=Arl2 PE=3 SV=1                                         | CAVPO | 4  |
| 1485 | 7.18 | 7.29 | 23.85 | 20.77 | 20.77 | tr H0V0A3 H0V0A3_CAVPO | Uncharacterized protein OS=Cavia porcellus GN=PNPO PE=3 SV=1                                         | CAVPO | 5  |
| 1486 | 7.18 | 7.37 | 14.31 | 14.31 | 12.72 | tr H0VIX4 H0VIX4_CAVPO | Uncharacterized protein OS=Cavia porcellus GN=Slc38a3 PE=4 SV=1                                      | CAVPO | 5  |
| 1487 | 7.17 | 9.4  | 20.8  | 20.8  | 12.39 | tr H0UXH8 H0UXH8_CAVPO | Mitochondrial import inner membrane translocase subunit TIM44 OS=Cavia porcellus GN=TIMM44 PE=3 SV=1 | CAVPO | 5  |
| 1488 | 7.16 | 7.36 | 8.895 | 5.634 | 2.743 | tr H0UZ91 H0UZ91_CAVPO | Uncharacterized protein OS=Cavia porcellus GN=TCOF1 PE=4 SV=1                                        | CAVPO | 4  |
| 1489 | 7.13 | 7.22 | 23.54 | 16.54 | 9.922 | tr H0V9N8 H0V9N8_CAVPO | Uncharacterized protein (Fragment) OS=Cavia                                                          | CAVPO | 4  |

|      |      |      |       |       |       |                        |                                                                                           |       |   |
|------|------|------|-------|-------|-------|------------------------|-------------------------------------------------------------------------------------------|-------|---|
|      |      |      |       |       |       |                        | porcellus GN=PMPCA PE=3 SV=1                                                              |       |   |
| 1490 | 7.12 | 7.17 | 47.41 | 47.41 | 47.41 | tr H0UY37 H0UY37_CAVPO | Uncharacterized protein OS=Cavia porcellus<br>GN=NDUFA5 PE=4 SV=1                         | CAVPO | 4 |
| 1491 | 7.12 | 7.72 | 48    | 41.14 | 32    | tr H0V5H7 H0V5H7_CAVPO | Uncharacterized protein OS=Cavia porcellus<br>GN=LOC100727312 PE=4 SV=1                   | CAVPO | 5 |
| 1492 | 7.1  | 9.31 | 31.43 | 25.97 | 16.88 | tr H0V3L6 H0V3L6_CAVPO | Uncharacterized protein OS=Cavia porcellus<br>GN=PRPSAP1 PE=4 SV=1                        | CAVPO | 6 |
| 1493 | 7.1  | 7.28 | 24.63 | 22.06 | 22.06 | tr H0VPX7 H0VPX7_CAVPO | ATP-dependent Clp protease proteolytic<br>subunit OS=Cavia porcellus GN=CLPP PE=3<br>SV=1 | CAVPO | 4 |
| 1494 | 7.1  | 8.12 | 37.64 | 21.71 | 18.24 | tr H0VQQ9 H0VQQ9_CAVPO | Uncharacterized protein OS=Cavia porcellus<br>GN=GSK3B PE=4 SV=1                          | CAVPO | 5 |
| 1495 | 7.09 | 7.19 | 11.96 | 9.129 | 7.45  | tr H0VC02 H0VC02_CAVPO | Oxysterol-binding protein OS=Cavia porcellus<br>GN=OSBPL1A PE=3 SV=1                      | CAVPO | 5 |
| 1496 | 7.09 | 7.24 | 16.63 | 14.12 | 12.07 | tr H0VJC5 H0VJC5_CAVPO | Uncharacterized protein OS=Cavia porcellus<br>GN=ANKMY2 PE=4 SV=1                         | CAVPO | 5 |
| 1497 | 7.06 | 7.22 | 40.57 | 36    | 26.29 | tr A9LPA2 A9LPA2_CAVPO | AlphaB-crystallin OS=Cavia porcellus<br>GN=Cryab PE=2 SV=1                                | CAVPO | 4 |
| 1498 | 7.06 | 7.19 | 10.37 | 6.146 | 6.146 | tr H0UX04 H0UX04_CAVPO | Uncharacterized protein OS=Cavia porcellus<br>GN=VAC14 PE=4 SV=1                          | CAVPO | 4 |
| 1499 | 7.06 | 7.35 | 32.23 | 27.01 | 19.43 | tr H0W636 H0W636_CAVPO | 60S ribosomal protein L13 OS=Cavia porcellus<br>GN=RPL13 PE=3 SV=1                        | CAVPO | 4 |
| 1500 | 7.04 | 7.13 | 16.18 | 14.97 | 11.23 | tr H0V3H4 H0V3H4_CAVPO | Uncharacterized protein OS=Cavia porcellus<br>GN=PPM1E PE=3 SV=1                          | CAVPO | 5 |
| 1501 | 7.03 | 7.09 | 13.17 | 7.302 | 7.302 | tr H0VT93 H0VT93_CAVPO | Uncharacterized protein OS=Cavia porcellus<br>GN=GATAD2A PE=4 SV=1                        | CAVPO | 4 |
| 1502 | 7.02 | 7.12 | 16.78 | 16.78 | 12.36 | tr H0V2I6 H0V2I6_CAVPO | Uncharacterized protein OS=Cavia porcellus<br>GN=GORASP2 PE=4 SV=1                        | CAVPO | 4 |

|      |      |      |       |       |       |                        |                                                                                |       |   |
|------|------|------|-------|-------|-------|------------------------|--------------------------------------------------------------------------------|-------|---|
| 1503 | 7.02 | 7.12 | 37.44 | 37.44 | 37.44 | tr H0VFF0 H0VFF0_CAVPO | Uncharacterized protein OS=Cavia porcellus<br>GN=RPS7 PE=4 SV=1                | CAVPO | 4 |
| 1504 | 7.01 | 7.23 | 20.29 | 8.592 | 6.563 | tr H0UXT4 H0UXT4_CAVPO | Uncharacterized protein (Fragment) OS=Cavia<br>porcellus GN=NCAM2 PE=4 SV=1    | CAVPO | 4 |
| 1505 | 6.99 | 7.17 | 35.83 | 28.75 | 17.92 | tr H0V6N0 H0V6N0_CAVPO | Uncharacterized protein (Fragment) OS=Cavia<br>porcellus GN=TMED4 PE=3 SV=1    | CAVPO | 5 |
| 1506 | 6.99 | 7.11 | 17.27 | 10.55 | 10.55 | tr H0VIH9 H0VIH9_CAVPO | Uncharacterized protein (Fragment) OS=Cavia<br>porcellus GN=ACADM PE=3 SV=1    | CAVPO | 4 |
| 1507 | 6.98 | 8.94 | 11.64 | 10.57 | 6.654 | tr H0VNM7 H0VNM7_CAVPO | Uncharacterized protein (Fragment) OS=Cavia<br>porcellus GN=LNPEP PE=4 SV=1    | CAVPO | 6 |
| 1508 | 6.97 | 7.06 | 26.65 | 21.56 | 18.56 | tr H0UXL3 H0UXL3_CAVPO | Uncharacterized protein OS=Cavia porcellus<br>GN=MAT2B PE=4 SV=1               | CAVPO | 4 |
| 1509 | 6.97 | 7.02 | 19.9  | 16.5  | 16.5  | tr H0V2G1 H0V2G1_CAVPO | Uncharacterized protein OS=Cavia porcellus<br>GN=RALB PE=4 SV=1                | CAVPO | 4 |
| 1510 | 6.96 | 7.04 | 12.64 | 9.195 | 6.404 | tr H0VD16 H0VD16_CAVPO | Uncharacterized protein OS=Cavia porcellus<br>GN=EPN1 PE=4 SV=1                | CAVPO | 4 |
| 1511 | 6.95 | 7.28 | 24.42 | 19.19 | 14.39 | tr H0V2P8 H0V2P8_CAVPO | Uncharacterized protein (Fragment) OS=Cavia<br>porcellus GN=MAP7 PE=4 SV=1     | CAVPO | 5 |
| 1512 | 6.94 | 7.2  | 21.49 | 19.63 | 11.94 | tr H0VCN1 H0VCN1_CAVPO | Putative GTP cyclohydrolase 1 type 2<br>OS=Cavia porcellus GN=NIF3L1 PE=3 SV=1 | CAVPO | 4 |
| 1513 | 6.94 | 7.01 | 14.5  | 4.22  | 4.22  | tr H0VG91 H0VG91_CAVPO | Uncharacterized protein (Fragment) OS=Cavia<br>porcellus GN=SMARCC1 PE=4 SV=1  | CAVPO | 4 |
| 1514 | 6.93 | 7.07 | 32.06 | 31.3  | 30.53 | tr H0W4R6 H0W4R6_CAVPO | Uncharacterized protein OS=Cavia porcellus<br>GN=PFDN6 PE=4 SV=1               | CAVPO | 4 |
| 1515 | 6.92 | 7.1  | 65.22 | 65.22 | 48.91 | tr H0V8K0 H0V8K0_CAVPO | Cytochrome b-c1 complex subunit 6 OS=Cavia<br>porcellus GN=UQCRH PE=3 SV=1     | CAVPO | 4 |
| 1516 | 6.91 | 7.03 | 24.86 | 20.62 | 8.671 | tr H0VNJ0 H0VNJ0_CAVPO | Uncharacterized protein OS=Cavia porcellus<br>GN=ARFGAP2 PE=4 SV=1             | CAVPO | 4 |

|      |      |      |       |       |       |                        |                                                                              |       |   |
|------|------|------|-------|-------|-------|------------------------|------------------------------------------------------------------------------|-------|---|
| 1517 | 6.91 | 7.07 | 21.83 | 13.71 | 11.42 | tr H0W1Y4 H0W1Y4_CAVPO | Uncharacterized protein OS=Cavia porcellus<br>GN=PHAX PE=4 SV=1              | CAVPO | 4 |
| 1518 | 6.9  | 7    | 14.95 | 14.95 | 14.95 | tr H0V3D4 H0V3D4_CAVPO | Uncharacterized protein OS=Cavia porcellus<br>GN=Rpl9 PE=4 SV=1              | CAVPO | 4 |
| 1519 | 6.9  | 6.98 | 21.07 | 18.54 | 18.54 | tr H0VW11 H0VW11_CAVPO | Uncharacterized protein (Fragment) OS=Cavia<br>porcellus GN=TIMM50 PE=4 SV=1 | CAVPO | 5 |
| 1520 | 6.89 | 7.05 | 26.84 | 18.88 | 16.81 | tr H0VHQ2 H0VHQ2_CAVPO | Uncharacterized protein OS=Cavia porcellus<br>GN=Igbp1 PE=4 SV=1             | CAVPO | 4 |
| 1521 | 6.86 | 6.99 | 46.27 | 46.27 | 35.82 | tr H0VG61 H0VG61_CAVPO | Uncharacterized protein OS=Cavia porcellus<br>GN=GNG13 PE=4 SV=1             | CAVPO | 4 |
| 1522 | 6.86 | 7.03 | 26.93 | 21.87 | 18.4  | tr H0VX42 H0VX42_CAVPO | Uncharacterized protein OS=Cavia porcellus<br>GN=C12orf10 PE=4 SV=1          | CAVPO | 6 |
| 1523 | 6.85 | 11.6 | 22.35 | 16.3  | 11.18 | tr H0VGV5 H0VGV5_CAVPO | Uncharacterized protein (Fragment) OS=Cavia<br>porcellus GN=AGO2 PE=3 SV=1   | CAVPO | 8 |
| 1524 | 6.85 | 17.5 | 52.33 | 44.56 | 44.56 | tr H0W798 H0W798_CAVPO | Uncharacterized protein OS=Cavia porcellus<br>GN=HPCAL1 PE=4 SV=1            | CAVPO | 9 |
| 1525 | 6.83 | 7.14 | 43.43 | 35.35 | 28.79 | tr H0V8T3 H0V8T3_CAVPO | Uncharacterized protein OS=Cavia porcellus<br>GN=YKT6 PE=4 SV=1              | CAVPO | 5 |
| 1526 | 6.82 | 6.94 | 49.18 | 49.18 | 29.51 | tr H0WDZ7 H0WDZ7_CAVPO | Uncharacterized protein OS=Cavia porcellus<br>GN=PFDN1 PE=4 SV=1             | CAVPO | 4 |
| 1527 | 6.81 | 6.9  | 12.79 | 9.39  | 4.46  | tr H0V6P7 H0V6P7_CAVPO | Uncharacterized protein (Fragment) OS=Cavia<br>porcellus GN=UBE3A PE=4 SV=1  | CAVPO | 5 |
| 1528 | 6.81 | 6.9  | 19.3  | 13.09 | 5.369 | tr H0VRR0 H0VRR0_CAVPO | Uncharacterized protein OS=Cavia porcellus<br>GN=PDLIM5 PE=4 SV=1            | CAVPO | 3 |
| 1529 | 6.81 | 6.87 | 36.18 | 36.18 | 35.68 | tr H0WAL4 H0WAL4_CAVPO | Uncharacterized protein OS=Cavia porcellus<br>GN=MRPL12 PE=3 SV=1            | CAVPO | 4 |
| 1530 | 6.8  | 7.04 | 33.97 | 33.97 | 28.21 | tr H0VKJ3 H0VKJ3_CAVPO | Acyl carrier protein OS=Cavia porcellus<br>GN=NDUFAB1 PE=3 SV=1              | CAVPO | 6 |

|      |      |      |       |       |       |                        |                                                                                |       |   |
|------|------|------|-------|-------|-------|------------------------|--------------------------------------------------------------------------------|-------|---|
| 1531 | 6.8  | 6.98 | 15.54 | 13.99 | 11.14 | tr H0VSR5 H0VSR5_CAVPO | Uncharacterized protein OS=Cavia porcellus<br>GN=SH3GLB1 PE=4 SV=1             | CAVPO | 4 |
| 1532 | 6.78 | 6.92 | 24.42 | 14.97 | 6.061 | tr H0VFI5 H0VFI5_CAVPO | Asparagine synthetase OS=Cavia porcellus<br>GN=ASNS PE=4 SV=1                  | CAVPO | 3 |
| 1533 | 6.78 | 6.91 | 29.06 | 29.06 | 25.66 | tr H0WAM6 H0WAM6_CAVPO | Uncharacterized protein OS=Cavia porcellus<br>GN=PQBP1 PE=4 SV=1               | CAVPO | 4 |
| 1534 | 6.77 | 6.99 | 28.81 | 21.31 | 11.24 | tr H0V6G3 H0V6G3_CAVPO | Uncharacterized protein (Fragment) OS=Cavia<br>porcellus GN=C6orf211 PE=4 SV=1 | CAVPO | 4 |
| 1535 | 6.77 | 7.08 | 10.49 | 6.936 | 3.633 | tr H0VE42 H0VE42_CAVPO | Uncharacterized protein (Fragment) OS=Cavia<br>porcellus GN=SEC24B PE=4 SV=1   | CAVPO | 3 |
| 1536 | 6.76 | 6.86 | 26.19 | 16.96 | 16.96 | tr H0UVC9 H0UVC9_CAVPO | Uncharacterized protein OS=Cavia porcellus<br>GN=CSNK1A1 PE=3 SV=1             | CAVPO | 4 |
| 1537 | 6.76 | 6.92 | 45.85 | 39.13 | 23.32 | tr H0V3S2 H0V3S2_CAVPO | Uncharacterized protein OS=Cavia porcellus<br>GN=NFU1 PE=4 SV=1                | CAVPO | 4 |
| 1538 | 6.76 | 7.01 | 24.72 | 24.72 | 14.72 | tr H0W3V6 H0W3V6_CAVPO | Uncharacterized protein OS=Cavia porcellus<br>GN=GMPPB PE=4 SV=1               | CAVPO | 4 |
| 1539 | 6.74 | 6.88 | 15.69 | 12.85 | 10.24 | tr H0VR15 H0VR15_CAVPO | Uncharacterized protein OS=Cavia porcellus<br>GN=ZNF259 PE=4 SV=1              | CAVPO | 4 |
| 1540 | 6.71 | 7.03 | 17.98 | 16.53 | 10.11 | tr H0UV05 H0UV05_CAVPO | Uncharacterized protein OS=Cavia porcellus<br>GN=CLINT1 PE=4 SV=1              | CAVPO | 5 |
| 1541 | 6.71 | 6.78 | 12.1  | 6.912 | 4.608 | tr H0VHK7 H0VHK7_CAVPO | Uncharacterized protein (Fragment) OS=Cavia<br>porcellus GN=KDM1A PE=4 SV=1    | CAVPO | 3 |
| 1542 | 6.71 | 6.85 | 13.49 | 9.797 | 7.763 | tr H0VKE6 H0VKE6_CAVPO | Uncharacterized protein (Fragment) OS=Cavia<br>porcellus GN=KPNA6 PE=4 SV=1    | CAVPO | 4 |
| 1543 | 6.7  | 13.8 | 13.47 | 8.588 | 6.831 | tr H0VJD9 H0VJD9_CAVPO | Uncharacterized protein OS=Cavia porcellus<br>GN=CLASP1 PE=4 SV=1              | CAVPO | 8 |
| 1544 | 6.69 | 7.08 | 12.04 | 3.827 | 2.923 | tr H0VDU9 H0VDU9_CAVPO | Uncharacterized protein OS=Cavia porcellus<br>GN=CLIP1 PE=4 SV=1               | CAVPO | 4 |



|      |      |      |       |       |        |                        |                                                                              |       |   |
|------|------|------|-------|-------|--------|------------------------|------------------------------------------------------------------------------|-------|---|
| 1545 | 6.69 | 6.84 | 27.02 | 27.02 | 19.57  | tr H0VIF0 H0VIF0_CAVPO | Uncharacterized protein OS=Cavia porcellus<br>GN=PSMD7 PE=4 SV=1             | CAVPO | 4 |
| 1546 | 6.68 | 6.82 | 30.32 | 30.32 | 26.6   | tr H0UUK1 H0UUK1_CAVPO | 40S ribosomal protein S8 (Fragment) OS=Cavia<br>porcellus GN=RPS8 PE=3 SV=1  | CAVPO | 4 |
| 1547 | 6.68 | 6.89 | 18.31 | 9.606 | 3.202  | tr H0V0X2 H0V0X2_CAVPO | Uncharacterized protein OS=Cavia porcellus<br>GN=PPFIA2 PE=4 SV=1            | CAVPO | 3 |
| 1548 | 6.64 | 6.83 | 11.21 | 9.032 | 4.788  | tr H0V1T6 H0V1T6_CAVPO | Uncharacterized protein (Fragment) OS=Cavia<br>porcellus GN=GTF3C2 PE=4 SV=1 | CAVPO | 3 |
| 1549 | 6.64 | 6.8  | 16.72 | 8.065 | 8.065  | tr H0V949 H0V949_CAVPO | Uncharacterized protein OS=Cavia porcellus<br>GN=HBS1L PE=4 SV=1             | CAVPO | 4 |
| 1550 | 6.64 | 6.82 | 19.78 | 19.33 | 9.888  | tr H0W6L0 H0W6L0_CAVPO | Phosphatidate cytidyltransferase OS=Cavia<br>porcellus GN=CDS2 PE=3 SV=1     | CAVPO | 3 |
| 1551 | 6.62 | 6.8  | 26.55 | 20.8  | 20.8   | tr H0UYQ9 H0UYQ9_CAVPO | Uncharacterized protein OS=Cavia porcellus<br>GN=LOC100727246 PE=4 SV=1      | CAVPO | 4 |
| 1552 | 6.62 | 6.78 | 28.98 | 23.25 | 10.51  | tr H0VK07 H0VK07_CAVPO | Uncharacterized protein OS=Cavia porcellus<br>GN=GDPD1 PE=4 SV=1             | CAVPO | 3 |
| 1553 | 6.6  | 6.74 | 10.53 | 8.062 | 4.161  | tr H0VKE8 H0VKE8_CAVPO | Uncharacterized protein (Fragment) OS=Cavia<br>porcellus GN=ABLIM1 PE=4 SV=1 | CAVPO | 3 |
| 1554 | 6.6  | 6.75 | 51.56 | 31.11 | 19.11  | tr H0VX24 H0VX24_CAVPO | Uncharacterized protein (Fragment) OS=Cavia<br>porcellus GN=AK4 PE=3 SV=1    | CAVPO | 4 |
| 1555 | 6.59 | 7.35 | 6.158 | 1.795 | 0.7143 | tr H0VBF5 H0VBF5_CAVPO | Uncharacterized protein OS=Cavia porcellus<br>GN=UBR4 PE=4 SV=1              | CAVPO | 3 |
| 1556 | 6.59 | 6.63 | 61.97 | 60.56 | 50.7   | tr H0VCW1 H0VCW1_CAVPO | Uncharacterized protein OS=Cavia porcellus<br>GN=Atp5i PE=4 SV=1             | CAVPO | 3 |
| 1557 | 6.59 | 6.89 | 27.59 | 24.56 | 16.71  | tr H0VHQ4 H0VHQ4_CAVPO | Uncharacterized protein OS=Cavia porcellus<br>GN=CADM3 PE=4 SV=1             | CAVPO | 3 |
| 1558 | 6.57 | 6.87 | 13.06 | 8.36  | 5.494  | tr H0VSB1 H0VSB1_CAVPO | Uncharacterized protein (Fragment) OS=Cavia<br>porcellus GN=CHL1 PE=4 SV=1   | CAVPO | 6 |

|      |      |      |       |       |       |                        |                                                                                             |       |   |
|------|------|------|-------|-------|-------|------------------------|---------------------------------------------------------------------------------------------|-------|---|
| 1559 | 6.55 | 6.88 | 19.26 | 10.96 | 5.738 | tr H0VMI5 H0VMI5_CAVPO | Uncharacterized protein OS=Cavia porcellus<br>GN=RNF20 PE=4 SV=1                            | CAVPO | 4 |
| 1560 | 6.53 | 6.63 | 35.47 | 31.98 | 31.98 | tr H0VKM6 H0VKM6_CAVPO | Uncharacterized protein (Fragment) OS=Cavia<br>porcellus GN=Cetn2 PE=4 SV=1                 | CAVPO | 4 |
| 1561 | 6.53 | 6.64 | 57.63 | 57.63 | 50    | tr H0VN10 H0VN10_CAVPO | Uncharacterized protein OS=Cavia porcellus<br>GN=MTPN PE=4 SV=1                             | CAVPO | 6 |
| 1562 | 6.53 | 6.63 | 20.97 | 20.97 | 20.97 | tr H0W9P3 H0W9P3_CAVPO | Uncharacterized protein (Fragment) OS=Cavia<br>porcellus GN=BRI3BP PE=4 SV=1                | CAVPO | 4 |
| 1563 | 6.52 | 6.72 | 21.69 | 11.42 | 11.42 | tr H0VYK0 H0VYK0_CAVPO | Uncharacterized protein (Fragment) OS=Cavia<br>porcellus GN=ESRRB PE=3 SV=1                 | CAVPO | 4 |
| 1564 | 6.52 | 6.63 | 15.27 | 8.545 | 8.545 | tr H0WBM1 H0WBM1_CAVPO | Uncharacterized protein (Fragment) OS=Cavia<br>porcellus GN=CPNE5 PE=4 SV=1                 | CAVPO | 4 |
| 1565 | 6.51 | 6.61 | 72    | 72    | 72    | tr H0W5B9 H0W5B9_CAVPO | Guanine nucleotide-binding protein subunit<br>gamma OS=Cavia porcellus GN=GNG3 PE=3<br>SV=1 | CAVPO | 4 |
| 1566 | 6.5  | 6.6  | 37.78 | 37.78 | 37.78 | tr H0V7E4 H0V7E4_CAVPO | Galectin (Fragment) OS=Cavia porcellus<br>GN=LGALS1 PE=4 SV=1                               | CAVPO | 5 |
| 1567 | 6.5  | 6.61 | 22.37 | 17.29 | 17.29 | tr H0VBM8 H0VBM8_CAVPO | Uncharacterized protein (Fragment) OS=Cavia<br>porcellus GN=BLVRA PE=4 SV=1                 | CAVPO | 4 |
| 1568 | 6.5  | 6.58 | 53.73 | 47.01 | 32.09 | tr H0VKP8 H0VKP8_CAVPO | Uncharacterized protein OS=Cavia porcellus<br>GN=CYB5A PE=3 SV=1                            | CAVPO | 3 |
| 1569 | 6.48 | 6.52 | 30.68 | 30.68 | 22.16 | tr H0VCR3 H0VCR3_CAVPO | Uncharacterized protein (Fragment) OS=Cavia<br>porcellus GN=RPS10 PE=4 SV=1                 | CAVPO | 3 |
| 1570 | 6.48 | 6.52 | 53.17 | 53.17 | 31.75 | tr H0VL48 H0VL48_CAVPO | Uncharacterized protein OS=Cavia porcellus<br>GN=Snrpd3 PE=4 SV=1                           | CAVPO | 4 |
| 1571 | 6.48 | 6.53 | 13.83 | 8.99  | 5.394 | tr H0VLH5 H0VLH5_CAVPO | Uncharacterized protein OS=Cavia porcellus<br>GN=EIF2B5 PE=4 SV=1                           | CAVPO | 3 |
| 1572 | 6.46 | 6.57 | 15.23 | 10.6  | 10.6  | tr H0UWN8 H0UWN8_CAVPO | Uncharacterized protein OS=Cavia porcellus                                                  | CAVPO | 4 |

|      |      |      |       |       |       |                        |                                                                           |       |   |
|------|------|------|-------|-------|-------|------------------------|---------------------------------------------------------------------------|-------|---|
|      |      |      |       |       |       |                        | GN=PRUNE PE=4 SV=1                                                        |       |   |
| 1573 | 6.46 | 8.73 | 59.26 | 55.56 | 42.59 | tr H0VUS4 H0VUS4_CAVPO | Uncharacterized protein (Fragment) OS=Cavia porcellus GN=PGRMC2 PE=4 SV=1 | CAVPO | 5 |
| 1574 | 6.46 | 7.6  | 30.8  | 28.03 | 17.65 | tr H0W7Q5 H0W7Q5_CAVPO | Uncharacterized protein OS=Cavia porcellus GN=NIPSNAP1 PE=4 SV=1          | CAVPO | 5 |
| 1575 | 6.45 | 6.48 | 17.59 | 13.89 | 8.796 | tr H0UW61 H0UW61_CAVPO | Uncharacterized protein (Fragment) OS=Cavia porcellus GN=RSRC2 PE=4 SV=1  | CAVPO | 3 |
| 1576 | 6.45 | 6.6  | 63.93 | 63.93 | 29.51 | tr H0V340 H0V340_CAVPO | Uncharacterized protein OS=Cavia porcellus GN=AAMDC PE=4 SV=1             | CAVPO | 3 |
| 1577 | 6.45 | 6.75 | 20.29 | 8.696 | 4.928 | tr H0V341 H0V341_CAVPO | Uncharacterized protein (Fragment) OS=Cavia porcellus GN=CRNKL1 PE=4 SV=1 | CAVPO | 3 |
| 1578 | 6.44 | 6.55 | 34.09 | 25.91 | 25.91 | tr H0UUX5 H0UUX5_CAVPO | Uncharacterized protein OS=Cavia porcellus GN=CHCHD3 PE=4 SV=1            | CAVPO | 4 |
| 1579 | 6.42 | 6.62 | 12.19 | 7.286 | 7.286 | tr H0V3L3 H0V3L3_CAVPO | Uncharacterized protein OS=Cavia porcellus GN=VWA5A PE=4 SV=1             | CAVPO | 4 |
| 1580 | 6.42 | 6.87 | 19.94 | 12.79 | 7.036 | tr H0VQQ0 H0VQQ0_CAVPO | Uncharacterized protein OS=Cavia porcellus GN=MSH2 PE=3 SV=1              | CAVPO | 6 |
| 1581 | 6.42 | 6.5  | 28.3  | 23.58 | 23.58 | tr Q811W5 Q811W5_CAVPO | Major prion protein (Fragment) OS=Cavia porcellus GN=PRNP PE=3 SV=1       | CAVPO | 4 |
| 1582 | 6.41 | 6.45 | 15.21 | 10.82 | 10.82 | tr H0VC37 H0VC37_CAVPO | Uncharacterized protein OS=Cavia porcellus GN=TIA1 PE=4 SV=1              | CAVPO | 4 |
| 1583 | 6.41 | 6.53 | 46.01 | 24.88 | 24.88 | tr H0W2H7 H0W2H7_CAVPO | Uncharacterized protein OS=Cavia porcellus GN=TPPP PE=4 SV=1              | CAVPO | 4 |
| 1584 | 6.4  | 6.43 | 16.73 | 11.74 | 9.431 | tr H0UVW2 H0UVW2_CAVPO | Uncharacterized protein OS=Cavia porcellus GN=AGFG1 PE=4 SV=1             | CAVPO | 3 |
| 1585 | 6.4  | 6.62 | 19.03 | 16.8  | 10.12 | tr H0WDI4 H0WDI4_CAVPO | Uncharacterized protein OS=Cavia porcellus GN=PCYOX1L PE=4 SV=1           | CAVPO | 4 |

|      |      |      |       |       |       |                        |                                                                                      |       |   |
|------|------|------|-------|-------|-------|------------------------|--------------------------------------------------------------------------------------|-------|---|
| 1586 | 6.38 | 6.65 | 5.591 | 3.599 | 2.506 | tr H0UU69 H0UU69_CAVPO | Uncharacterized protein (Fragment) OS=Cavia porcellus GN=DIP2C PE=4 SV=1             | CAVPO | 4 |
| 1587 | 6.38 | 6.42 | 24.93 | 13.33 | 11.3  | tr H0V2K0 H0V2K0_CAVPO | Uncharacterized protein (Fragment) OS=Cavia porcellus GN=PHYHIPL PE=4 SV=1           | CAVPO | 3 |
| 1588 | 6.38 | 6.57 | 20.29 | 16.56 | 6.275 | tr H0VRK8 H0VRK8_CAVPO | Uncharacterized protein OS=Cavia porcellus GN=MUT PE=4 SV=1                          | CAVPO | 3 |
| 1589 | 6.37 | 6.83 | 26.43 | 21.52 | 9.426 | tr H0VR62 H0VR62_CAVPO | Uncharacterized protein (Fragment) OS=Cavia porcellus GN=PEPD PE=3 SV=1              | CAVPO | 4 |
| 1590 | 6.37 | 6.47 | 49.25 | 35.07 | 35.07 | tr H0VR89 H0VR89_CAVPO | Uncharacterized protein (Fragment) OS=Cavia porcellus GN=NDUFA6 PE=4 SV=1            | CAVPO | 5 |
| 1591 | 6.36 | 6.51 | 18.09 | 14.76 | 7.9   | tr H0VM62 H0VM62_CAVPO | Uncharacterized protein (Fragment) OS=Cavia porcellus GN=WRNIP1 PE=4 SV=1            | CAVPO | 3 |
| 1592 | 6.35 | 6.47 | 10.8  | 5.78  | 4.907 | tr H0V610 H0V610_CAVPO | Uncharacterized protein (Fragment) OS=Cavia porcellus GN=ATP2C1 PE=4 SV=1            | CAVPO | 4 |
| 1593 | 6.35 | 8.24 | 8.293 | 4.581 | 1.633 | tr H0VEH4 H0VEH4_CAVPO | Uncharacterized protein (Fragment) OS=Cavia porcellus PE=4 SV=1                      | CAVPO | 6 |
| 1594 | 6.35 | 6.38 | 22.78 | 18.92 | 18.92 | tr H0WD98 H0WD98_CAVPO | Uncharacterized protein (Fragment) OS=Cavia porcellus GN=TOLLIP PE=4 SV=1            | CAVPO | 4 |
| 1595 | 6.34 | 6.46 | 14.41 | 10.65 | 9.806 | tr H0VKJ8 H0VKJ8_CAVPO | Uncharacterized protein (Fragment) OS=Cavia porcellus GN=SGIP1 PE=4 SV=1             | CAVPO | 4 |
| 1596 | 6.33 | 6.54 | 66.95 | 57.63 | 34.75 | tr H0V3M5 H0V3M5_CAVPO | Uncharacterized protein OS=Cavia porcellus GN=LOC100726700 PE=4 SV=1                 | CAVPO | 5 |
| 1597 | 6.3  | 6.44 | 32.59 | 32.59 | 32.59 | tr H0VRM1 H0VRM1_CAVPO | Uncharacterized protein (Fragment) OS=Cavia porcellus GN=LOC100731223 PE=3 SV=1      | CAVPO | 4 |
| 1598 | 6.29 | 6.55 | 9.984 | 6.084 | 4.056 | tr H0UW34 H0UW34_CAVPO | Uncharacterized protein (Fragment) OS=Cavia porcellus GN=ATXN2 PE=4 SV=1             | CAVPO | 3 |
| 1599 | 6.28 | 6.44 | 45.48 | 41.29 | 20.32 | tr H0W8Q2 H0W8Q2_CAVPO | NAD-dependent protein deacylase sirtuin-5, mitochondrial OS=Cavia porcellus GN=SIRT5 | CAVPO | 4 |

|      |      |      |       |       |       |                        |                                                                                            |       |   |
|------|------|------|-------|-------|-------|------------------------|--------------------------------------------------------------------------------------------|-------|---|
|      |      |      |       |       |       |                        | PE=3 SV=1                                                                                  |       |   |
| 1600 | 6.27 | 6.56 | 17.99 | 13.39 | 7.95  | tr H0V5Q0 H0V5Q0_CAVPO | Uncharacterized protein (Fragment) OS=Cavia porcellus GN=CSTF3 PE=4 SV=1                   | CAVPO | 3 |
| 1601 | 6.27 | 17.4 | 22.77 | 15.33 | 14.14 | tr H0VFG9 H0VFG9_CAVPO | Uncharacterized protein (Fragment) OS=Cavia porcellus GN=STRBP PE=4 SV=1                   | CAVPO | 9 |
| 1602 | 6.26 | 6.37 | 22.24 | 12.87 | 11.03 | tr H0UYS6 H0UYS6_CAVPO | Eukaryotic translation initiation factor 3 subunit D OS=Cavia porcellus GN=EIF3D PE=3 SV=1 | CAVPO | 5 |
| 1603 | 6.26 | 6.53 | 30.27 | 22.33 | 20.6  | tr H0VFZ5 H0VFZ5_CAVPO | Uncharacterized protein (Fragment) OS=Cavia porcellus GN=RPL3 PE=3 SV=1                    | CAVPO | 5 |
| 1604 | 6.26 | 6.38 | 47.67 | 47.67 | 38.37 | tr H0VPT6 H0VPT6_CAVPO | Uncharacterized protein (Fragment) OS=Cavia porcellus GN=SNRPF PE=4 SV=1                   | CAVPO | 7 |
| 1605 | 6.25 | 6.34 | 13.87 | 13.87 | 13.87 | tr H0V235 H0V235_CAVPO | Uncharacterized protein (Fragment) OS=Cavia porcellus GN=CADM4 PE=4 SV=1                   | CAVPO | 4 |
| 1606 | 6.24 | 6.35 | 39.22 | 27.78 | 13.4  | tr H0V0H2 H0V0H2_CAVPO | Uncharacterized protein (Fragment) OS=Cavia porcellus GN=CRYL1 PE=4 SV=1                   | CAVPO | 3 |
| 1607 | 6.24 | 6.38 | 54.17 | 54.17 | 37.5  | tr H0V7X7 H0V7X7_CAVPO | Uncharacterized protein OS=Cavia porcellus GN=NAA38 PE=4 SV=1                              | CAVPO | 5 |
| 1608 | 6.23 | 6.4  | 30.48 | 23.29 | 18.84 | tr H0VP73 H0VP73_CAVPO | Uncharacterized protein (Fragment) OS=Cavia porcellus GN=PGAM5 PE=4 SV=1                   | CAVPO | 4 |
| 1609 | 6.23 | 6.6  | 10.04 | 8.185 | 3.772 | tr H0VW18 H0VW18_CAVPO | Uncharacterized protein OS=Cavia porcellus GN=EDC4 PE=4 SV=1                               | CAVPO | 4 |
| 1610 | 6.22 | 6.37 | 7.971 | 7.005 | 7.005 | tr H0WAW2 H0WAW2_CAVPO | Uncharacterized protein OS=Cavia porcellus GN=ABCF1 PE=3 SV=1                              | CAVPO | 5 |
| 1611 | 6.2  | 6.3  | 16.56 | 12.27 | 10.84 | tr H0VBK8 H0VBK8_CAVPO | Uncharacterized protein OS=Cavia porcellus GN=PMPCB PE=3 SV=1                              | CAVPO | 4 |
| 1612 | 6.2  | 6.36 | 42.91 | 37.65 | 27.94 | tr H0VK62 H0VK62_CAVPO | Uncharacterized protein OS=Cavia porcellus GN=OCIAD1 PE=4 SV=1                             | CAVPO | 4 |

|      |      |      |       |       |       |                        |                                                                                                              |       |    |
|------|------|------|-------|-------|-------|------------------------|--------------------------------------------------------------------------------------------------------------|-------|----|
| 1613 | 6.2  | 6.35 | 43.55 | 36.02 | 31.18 | tr H0W5U3 H0W5U3_CAVPO | Uncharacterized protein OS=Cavia porcellus<br>GN=Ndufb8 PE=4 SV=1                                            | CAVPO | 4  |
| 1614 | 6.19 | 6.46 | 18.6  | 12.88 | 7.01  | tr H0UZ86 H0UZ86_CAVPO | Uncharacterized protein (Fragment) OS=Cavia<br>porcellus GN=Acs11 PE=4 SV=1                                  | CAVPO | 5  |
| 1615 | 6.18 | 6.61 | 38.1  | 24.13 | 17.78 | tr H0VH22 H0VH22_CAVPO | Uncharacterized protein OS=Cavia porcellus<br>GN=WDR82 PE=4 SV=1                                             | CAVPO | 4  |
| 1616 | 6.17 | 6.34 | 16.22 | 11.64 | 11.64 | tr H0VQZ8 H0VQZ8_CAVPO | Uncharacterized protein OS=Cavia porcellus<br>GN=ABI1 PE=4 SV=1                                              | CAVPO | 4  |
| 1617 | 6.17 | 17.1 | 73.91 | 67.7  | 58.39 | tr H0W2A1 H0W2A1_CAVPO | Nucleoside diphosphate kinase (Fragment)<br>OS=Cavia porcellus GN=Nme1 PE=3 SV=1                             | CAVPO | 11 |
| 1618 | 6.17 | 6.3  | 30.75 | 20.42 | 7.746 | tr H0W673 H0W673_CAVPO | Uncharacterized protein OS=Cavia porcellus<br>GN=IVD PE=3 SV=1                                               | CAVPO | 3  |
| 1619 | 6.16 | 6.55 | 21.11 | 16.48 | 10.74 | tr H0VFB2 H0VFB2_CAVPO | Uncharacterized protein (Fragment) OS=Cavia<br>porcellus GN=SLC27A1 PE=4 SV=1                                | CAVPO | 5  |
| 1620 | 6.15 | 6.17 | 43.9  | 39.84 | 31.71 | tr H0UZK8 H0UZK8_CAVPO | Uncharacterized protein OS=Cavia porcellus<br>GN=Txndc17 PE=4 SV=1                                           | CAVPO | 3  |
| 1621 | 6.15 | 6.17 | 41.44 | 41.44 | 41.44 | tr H0V7R6 H0V7R6_CAVPO | Cytochrome c oxidase subunit 6A,<br>mitochondrial (Fragment) OS=Cavia porcellus<br>GN=LOC100714805 PE=3 SV=1 | CAVPO | 4  |
| 1622 | 6.15 | 6.18 | 21.47 | 14.42 | 14.42 | tr H0V8Y9 H0V8Y9_CAVPO | Uncharacterized protein OS=Cavia porcellus<br>GN=SYP PE=4 SV=1                                               | CAVPO | 6  |
| 1623 | 6.15 | 6.27 | 32.4  | 27.93 | 24.58 | tr H0W2P6 H0W2P6_CAVPO | Uncharacterized protein OS=Cavia porcellus<br>GN=PTRH2 PE=4 SV=1                                             | CAVPO | 3  |
| 1624 | 6.14 | 6.29 | 19.02 | 14.88 | 8.286 | tr H0UVE3 H0UVE3_CAVPO | Uncharacterized protein (Fragment) OS=Cavia<br>porcellus GN=CLCC1 PE=4 SV=1                                  | CAVPO | 3  |
| 1625 | 6.14 | 21.2 | 13.78 | 7.248 | 4.818 | tr H0VPB1 H0VPB1_CAVPO | Uncharacterized protein OS=Cavia porcellus<br>GN=SPTBN2 PE=4 SV=1                                            | CAVPO | 11 |
| 1626 | 6.14 | 6.35 | 21.6  | 20.27 | 8.686 | tr H0W9Y5 H0W9Y5_CAVPO | Uncharacterized protein OS=Cavia porcellus                                                                   | CAVPO | 3  |

|      |      |      |       |       |       |                        |                                                                              |       |   |
|------|------|------|-------|-------|-------|------------------------|------------------------------------------------------------------------------|-------|---|
|      |      |      |       |       |       |                        | GN=UBXN6 PE=4 SV=1                                                           |       |   |
| 1627 | 6.13 | 6.15 | 52.56 | 46.79 | 35.9  | tr H0V870 H0V870_CAVPO | Uncharacterized protein OS=Cavia porcellus<br>GN=GAP43 PE=4 SV=1             | CAVPO | 3 |
| 1628 | 6.13 | 6.47 | 9.595 | 4.296 | 1.826 | tr H0VBT5 H0VBT5_CAVPO | Uncharacterized protein (Fragment) OS=Cavia<br>porcellus GN=LRBA PE=4 SV=1   | CAVPO | 5 |
| 1629 | 6.13 | 6.26 | 28.13 | 21.02 | 17.9  | tr H0WCF1 H0WCF1_CAVPO | Uncharacterized protein OS=Cavia porcellus<br>GN=PTRF PE=4 SV=1              | CAVPO | 7 |
| 1630 | 6.12 | 6.22 | 54.88 | 46.34 | 36.59 | tr H0UY09 H0UY09_CAVPO | Uncharacterized protein OS=Cavia porcellus<br>GN=NDUFA4 PE=4 SV=1            | CAVPO | 3 |
| 1631 | 6.12 | 7.5  | 9.806 | 5.226 | 2.909 | tr H0V3B5 H0V3B5_CAVPO | Uncharacterized protein OS=Cavia porcellus<br>GN=GBF1 PE=4 SV=1              | CAVPO | 5 |
| 1632 | 6.12 | 6.4  | 27.65 | 14.85 | 7.509 | tr H0VMM0 H0VMM0_CAVPO | Uncharacterized protein OS=Cavia porcellus<br>GN=ACSF3 PE=4 SV=1             | CAVPO | 4 |
| 1633 | 6.12 | 6.28 | 35.29 | 24.79 | 24.79 | tr H0VU14 H0VU14_CAVPO | Uncharacterized protein (Fragment) OS=Cavia<br>porcellus GN=SCAMP5 PE=4 SV=1 | CAVPO | 4 |
| 1634 | 6.11 | 6.2  | 24.9  | 20.82 | 13.88 | tr H0UT89 H0UT89_CAVPO | Uncharacterized protein OS=Cavia porcellus<br>GN=TFAM PE=4 SV=1              | CAVPO | 3 |
| 1635 | 6.11 | 6.22 | 31.52 | 23.91 | 17.93 | tr H0VAC6 H0VAC6_CAVPO | Uncharacterized protein OS=Cavia porcellus<br>GN=RHEB PE=4 SV=1              | CAVPO | 3 |
| 1636 | 6.11 | 6.13 | 49.35 | 29.87 | 29.87 | tr H0VPS7 H0VPS7_CAVPO | Uncharacterized protein OS=Cavia porcellus<br>GN=PFDN2 PE=4 SV=1             | CAVPO | 5 |
| 1637 | 6.1  | 6.11 | 34.19 | 20.96 | 20.96 | tr H0VFR4 H0VFR4_CAVPO | Uncharacterized protein OS=Cavia porcellus<br>GN=TIPRL PE=4 SV=1             | CAVPO | 5 |
| 1638 | 6.1  | 6.11 | 14.01 | 5.839 | 5.839 | tr H0VKK2 H0VKK2_CAVPO | Uncharacterized protein OS=Cavia porcellus<br>GN=SAMD11 PE=4 SV=1            | CAVPO | 3 |
| 1639 | 6.1  | 6.24 | 30.38 | 27.43 | 20.25 | tr H0VP30 H0VP30_CAVPO | Uncharacterized protein (Fragment) OS=Cavia<br>porcellus GN=NQO2 PE=4 SV=1   | CAVPO | 4 |

|      |      |      |       |       |       |                        |                                                                                |       |   |
|------|------|------|-------|-------|-------|------------------------|--------------------------------------------------------------------------------|-------|---|
| 1640 | 6.08 | 10.5 | 22.16 | 15.8  | 13.68 | tr H0VG43 H0VG43_CAVPO | Uncharacterized protein OS=Cavia porcellus<br>GN=SNX2 PE=4 SV=1                | CAVPO | 6 |
| 1641 | 6.08 | 6.3  | 15.45 | 15.45 | 15.45 | tr H0VLM9 H0VLM9_CAVPO | Uncharacterized protein OS=Cavia porcellus<br>GN=TPP1 PE=4 SV=1                | CAVPO | 6 |
| 1642 | 6.07 | 6.17 | 4.674 | 3.635 | 3.635 | tr H0VFU2 H0VFU2_CAVPO | Ubiquitin carboxyl-terminal hydrolase<br>OS=Cavia porcellus GN=USP19 PE=3 SV=1 | CAVPO | 4 |
| 1643 | 6.07 | 6.16 | 7.67  | 6.534 | 5.256 | tr H0W9U5 H0W9U5_CAVPO | Uncharacterized protein OS=Cavia porcellus<br>GN=RNFB214 PE=4 SV=1             | CAVPO | 3 |
| 1644 | 6.06 | 6.07 | 32.3  | 22.12 | 22.12 | tr H0VFF8 H0VFF8_CAVPO | Uncharacterized protein OS=Cavia porcellus<br>GN=CHCHD6 PE=4 SV=1              | CAVPO | 3 |
| 1645 | 6.05 | 7.49 | 34.05 | 29.75 | 19.02 | tr H0V1Z1 H0V1Z1_CAVPO | Uncharacterized protein OS=Cavia porcellus<br>GN=MAPRE2 PE=4 SV=1              | CAVPO | 5 |
| 1646 | 6.04 | 6.05 | 28.71 | 28.71 | 28.71 | tr H0V0V8 H0V0V8_CAVPO | Uncharacterized protein OS=Cavia porcellus<br>GN=TMED2 PE=3 SV=1               | CAVPO | 4 |
| 1647 | 6.04 | 6.15 | 33.9  | 33.9  | 29.94 | tr H0W038 H0W038_CAVPO | Uncharacterized protein OS=Cavia porcellus<br>GN=MXRA7 PE=4 SV=1               | CAVPO | 5 |
| 1648 | 6.03 | 6.16 | 18.15 | 13.31 | 7.863 | tr H0VHW8 H0VHW8_CAVPO | Uncharacterized protein OS=Cavia porcellus<br>GN=WDR37 PE=4 SV=1               | CAVPO | 3 |
| 1649 | 6.02 | 6.03 | 27.08 | 21.53 | 21.53 | tr H0W934 H0W934_CAVPO | Uncharacterized protein OS=Cavia porcellus<br>GN=LOC100731197 PE=3 SV=1        | CAVPO | 3 |
| 1650 | 6.01 | 6.01 | 20.89 | 20.89 | 20.89 | tr H0UZJ1 H0UZJ1_CAVPO | Uncharacterized protein OS=Cavia porcellus<br>GN=ACP1 PE=4 SV=1                | CAVPO | 4 |
| 1651 | 6.01 | 6.01 | 25    | 20.61 | 20.61 | tr H0V5Y1 H0V5Y1_CAVPO | Uncharacterized protein (Fragment) OS=Cavia<br>porcellus GN=FAM3C PE=4 SV=1    | CAVPO | 3 |
| 1652 | 6    | 6    | 8.462 | 8.462 | 8.462 | tr A9Z0V9 A9Z0V9_CAVPO | Carbonic anhydrase 3 OS=Cavia porcellus<br>GN=CA3 PE=2 SV=1                    | CAVPO | 3 |
| 1653 | 6    | 6    | 34.02 | 34.02 | 34.02 | tr H0UU57 H0UU57_CAVPO | Uncharacterized protein OS=Cavia porcellus<br>GN=TIMM8A PE=4 SV=1              | CAVPO | 3 |



|      |   |      |       |       |       |                        |                                                                               |       |   |
|------|---|------|-------|-------|-------|------------------------|-------------------------------------------------------------------------------|-------|---|
| 1654 | 6 | 6    | 42.22 | 42.22 | 42.22 | tr H0UUV1 H0UUV1_CAVPO | Uncharacterized protein (Fragment) OS=Cavia porcellus GN=HN1 PE=4 SV=1        | CAVPO | 3 |
| 1655 | 6 | 6    | 24.84 | 24.84 | 24.84 | tr H0UUY0 H0UUY0_CAVPO | Uncharacterized protein OS=Cavia porcellus GN=NUDCD2 PE=4 SV=1                | CAVPO | 3 |
| 1656 | 6 | 6    | 19.86 | 14.08 | 14.08 | tr H0V1F7 H0V1F7_CAVPO | Uncharacterized protein OS=Cavia porcellus GN=C1QBP PE=4 SV=1                 | CAVPO | 3 |
| 1657 | 6 | 6    | 28.57 | 24.6  | 24.6  | tr H0V1V2 H0V1V2_CAVPO | Uncharacterized protein OS=Cavia porcellus GN=MPC2 PE=4 SV=1                  | CAVPO | 3 |
| 1658 | 6 | 6    | 54.55 | 54.55 | 54.55 | tr H0V7L1 H0V7L1_CAVPO | Uncharacterized protein OS=Cavia porcellus GN=DPY30 PE=4 SV=1                 | CAVPO | 3 |
| 1659 | 6 | 6.01 | 22.39 | 19.4  | 19.4  | tr H0VBW8 H0VBW8_CAVPO | Uncharacterized protein OS=Cavia porcellus GN=CHMP6 PE=4 SV=1                 | CAVPO | 3 |
| 1660 | 6 | 6    | 33.81 | 33.81 | 33.81 | tr H0VEA9 H0VEA9_CAVPO | Uncharacterized protein OS=Cavia porcellus GN=RTCA PE=4 SV=1                  | CAVPO | 3 |
| 1661 | 6 | 6.18 | 15.14 | 9.031 | 6.507 | tr H0VQ12 H0VQ12_CAVPO | Uncharacterized protein OS=Cavia porcellus GN=TFRC PE=4 SV=1                  | CAVPO | 4 |
| 1662 | 6 | 6.05 | 11.98 | 7.385 | 7.385 | tr H0VRG5 H0VRG5_CAVPO | Uncharacterized protein OS=Cavia porcellus PE=4 SV=1                          | CAVPO | 3 |
| 1663 | 6 | 6    | 32.5  | 32.5  | 32.5  | tr H0VT87 H0VT87_CAVPO | Uncharacterized protein OS=Cavia porcellus GN=LSM6 PE=4 SV=1                  | CAVPO | 3 |
| 1664 | 6 | 6.01 | 39.02 | 39.02 | 39.02 | tr H0VV27 H0VV27_CAVPO | 40S ribosomal protein S27 (Fragment)<br>OS=Cavia porcellus GN=Rps27 PE=3 SV=1 | CAVPO | 4 |
| 1665 | 6 | 6    | 9.16  | 9.16  | 9.16  | tr H0VYG7 H0VYG7_CAVPO | Uncharacterized protein (Fragment) OS=Cavia porcellus GN=LAMP1 PE=4 SV=1      | CAVPO | 3 |
| 1666 | 6 | 8    | 22.54 | 21.97 | 21.97 | tr H0W3B9 H0W3B9_CAVPO | Uncharacterized protein OS=Cavia porcellus GN=HIST1H1E PE=3 SV=1              | CAVPO | 4 |
| 1667 | 6 | 6    | 41.61 | 41.61 | 31.06 | tr Q9WUR5 Q9WUR5_CAVPO | Thy-1 protein OS=Cavia porcellus GN=Thy-1<br>PE=2 SV=1                        | CAVPO | 3 |

|      |      |      |       |       |       |                        |                                                                                       |       |   |
|------|------|------|-------|-------|-------|------------------------|---------------------------------------------------------------------------------------|-------|---|
| 1668 | 5.99 | 6.04 | 11.79 | 6.534 | 4.784 | tr H0VT68 H0VT68_CAVPO | Uncharacterized protein OS=Cavia porcellus<br>GN=FDPS PE=4 SV=1                       | CAVPO | 3 |
| 1669 | 5.96 | 6.12 | 17.01 | 10.72 | 7.579 | tr H0VS64 H0VS64_CAVPO | Uncharacterized protein (Fragment) OS=Cavia<br>porcellus GN=LRRC47 PE=4 SV=1          | CAVPO | 3 |
| 1670 | 5.94 | 6.98 | 35.32 | 24.11 | 12.65 | tr H0W2Z8 H0W2Z8_CAVPO | Uncharacterized protein (Fragment) OS=Cavia<br>porcellus GN=CNP PE=4 SV=1             | CAVPO | 4 |
| 1671 | 5.93 | 6.15 | 19.77 | 19.48 | 19.48 | tr H0VH54 H0VH54_CAVPO | Uncharacterized protein (Fragment) OS=Cavia<br>porcellus GN=DNAJB4 PE=4 SV=1          | CAVPO | 5 |
| 1672 | 5.92 | 6.09 | 19.86 | 6.575 | 5.616 | tr H0UT96 H0UT96_CAVPO | Uncharacterized protein (Fragment) OS=Cavia<br>porcellus GN=HOOK1 PE=4 SV=1           | CAVPO | 3 |
| 1673 | 5.92 | 6.02 | 23.44 | 17.8  | 9.496 | tr H0VPY5 H0VPY5_CAVPO | Uncharacterized protein OS=Cavia porcellus<br>GN=ERI3 PE=4 SV=1                       | CAVPO | 3 |
| 1674 | 5.92 | 5.99 | 33.99 | 33.99 | 28.76 | tr H0VRN0 H0VRN0_CAVPO | Actin-related protein 2/3 complex subunit 5<br>OS=Cavia porcellus GN=ARPC5L PE=3 SV=1 | CAVPO | 4 |
| 1675 | 5.91 | 6    | 22.05 | 18.73 | 14.2  | tr H0VD47 H0VD47_CAVPO | Uncharacterized protein OS=Cavia porcellus<br>GN=DFFA PE=4 SV=1                       | CAVPO | 3 |
| 1676 | 5.91 | 8.24 | 14.29 | 14.29 | 12.24 | tr H0VEC9 H0VEC9_CAVPO | Uncharacterized protein (Fragment) OS=Cavia<br>porcellus GN=PPP2R5A PE=4 SV=1         | CAVPO | 5 |
| 1677 | 5.91 | 5.98 | 28.92 | 28.92 | 24.7  | tr H0VGN5 H0VGN5_CAVPO | Peptidyl-prolyl cis-trans isomerase OS=Cavia<br>porcellus GN=PPIL1 PE=3 SV=1          | CAVPO | 3 |
| 1678 | 5.89 | 5.97 | 50    | 50    | 50    | tr H0VVN9 H0VVN9_CAVPO | Uncharacterized protein (Fragment) OS=Cavia<br>porcellus GN=ATOX1 PE=4 SV=1           | CAVPO | 3 |
| 1679 | 5.88 | 5.97 | 15.28 | 7.776 | 4.775 | tr H0VKX8 H0VKX8_CAVPO | Uncharacterized protein (Fragment) OS=Cavia<br>porcellus GN=XRCC5 PE=4 SV=1           | CAVPO | 3 |
| 1680 | 5.87 | 5.95 | 26.67 | 22.96 | 22.96 | tr H0V582 H0V582_CAVPO | Uncharacterized protein OS=Cavia porcellus<br>GN=LHPP PE=4 SV=1                       | CAVPO | 4 |
| 1681 | 5.86 | 6.08 | 47.22 | 36.57 | 26.85 | tr H0V5S9 H0V5S9_CAVPO | Ribosomal protein (Fragment) OS=Cavia<br>porcellus GN=RPL10A PE=3 SV=1                | CAVPO | 5 |

|      |      |      |       |       |       |                        |                                                                           |       |   |
|------|------|------|-------|-------|-------|------------------------|---------------------------------------------------------------------------|-------|---|
| 1682 | 5.85 | 5.94 | 27.31 | 19.68 | 13.25 | tr H0V1C8 H0V1C8_CAVPO | Uncharacterized protein (Fragment) OS=Cavia porcellus GN=LRRC57 PE=4 SV=1 | CAVPO | 3 |
| 1683 | 5.85 | 6.11 | 51.19 | 51.19 | 42.86 | tr H0V252 H0V252_CAVPO | Uncharacterized protein (Fragment) OS=Cavia porcellus GN=ACBD7 PE=4 SV=1  | CAVPO | 3 |
| 1684 | 5.85 | 5.92 | 24.12 | 24.12 | 18.59 | tr H0VAK4 H0VAK4_CAVPO | Uncharacterized protein OS=Cavia porcellus GN=DIRAS2 PE=4 SV=1            | CAVPO | 3 |
| 1685 | 5.85 | 9.4  | 26.27 | 21.2  | 16.14 | tr H0VY24 H0VY24_CAVPO | Uncharacterized protein OS=Cavia porcellus GN=Akr1b10 PE=4 SV=1           | CAVPO | 6 |
| 1686 | 5.84 | 6.01 | 20.59 | 12.74 | 8.917 | tr H0VFU5 H0VFU5_CAVPO | Uncharacterized protein OS=Cavia porcellus GN=CPSF7 PE=4 SV=1             | CAVPO | 3 |
| 1687 | 5.84 | 5.9  | 42.78 | 32.22 | 32.22 | tr H0W8T2 H0W8T2_CAVPO | Uncharacterized protein (Fragment) OS=Cavia porcellus GN=PDAP1 PE=4 SV=1  | CAVPO | 5 |
| 1688 | 5.83 | 6.02 | 32.35 | 19.41 | 11.65 | tr H0V1M8 H0V1M8_CAVPO | Uncharacterized protein OS=Cavia porcellus GN=ATL3 PE=4 SV=1              | CAVPO | 5 |
| 1689 | 5.83 | 6.03 | 12.46 | 9.044 | 5.973 | tr H0VXF7 H0VXF7_CAVPO | Uncharacterized protein OS=Cavia porcellus GN=SETD3 PE=4 SV=1             | CAVPO | 3 |
| 1690 | 5.82 | 6.18 | 12.11 | 8.993 | 6.954 | tr H0WBE6 H0WBE6_CAVPO | Uncharacterized protein OS=Cavia porcellus GN=MOGS PE=4 SV=1              | CAVPO | 4 |
| 1691 | 5.81 | 5.89 | 14.63 | 8.657 | 5.97  | tr H0VG58 H0VG58_CAVPO | Uncharacterized protein (Fragment) OS=Cavia porcellus GN=Wdr92 PE=4 SV=1  | CAVPO | 3 |
| 1692 | 5.81 | 5.91 | 41.22 | 34.46 | 34.46 | tr H0VT51 H0VT51_CAVPO | Uncharacterized protein (Fragment) OS=Cavia porcellus GN=MGST3 PE=4 SV=1  | CAVPO | 3 |
| 1693 | 5.79 | 6.1  | 23.11 | 12.13 | 10.53 | tr H0UYD7 H0UYD7_CAVPO | Uncharacterized protein OS=Cavia porcellus GN=ETF1 PE=4 SV=1              | CAVPO | 4 |
| 1694 | 5.79 | 5.85 | 34.08 | 28.49 | 22.91 | tr H0V8L2 H0V8L2_CAVPO | Uncharacterized protein (Fragment) OS=Cavia porcellus GN=PBDC1 PE=4 SV=1  | CAVPO | 3 |
| 1695 | 5.78 | 6.1  | 9.236 | 6.25  | 3.264 | tr H0VJ73 H0VJ73_CAVPO | Uncharacterized protein OS=Cavia porcellus GN=CPSF1 PE=4 SV=1             | CAVPO | 4 |

|      |      |      |       |       |       |                        |                                                                                                                        |       |   |
|------|------|------|-------|-------|-------|------------------------|------------------------------------------------------------------------------------------------------------------------|-------|---|
| 1696 | 5.77 | 6.31 | 18.78 | 17.09 | 10.55 | tr H0V2L6 H0V2L6_CAVPO | Uncharacterized protein OS=Cavia porcellus<br>GN=GSS PE=4 SV=1                                                         | CAVPO | 4 |
| 1697 | 5.77 | 5.82 | 31.01 | 31.01 | 31.01 | tr H0VK68 H0VK68_CAVPO | Uncharacterized protein OS=Cavia porcellus<br>GN=ISCA1 PE=4 SV=1                                                       | CAVPO | 3 |
| 1698 | 5.77 | 6.06 | 11.19 | 6.454 | 4.085 | tr H0VQP5 H0VQP5_CAVPO | Uncharacterized protein OS=Cavia porcellus<br>GN=WDR11 PE=4 SV=1                                                       | CAVPO | 3 |
| 1699 | 5.75 | 6    | 14.45 | 11.85 | 8.96  | tr H0V7S1 H0V7S1_CAVPO | Uncharacterized protein OS=Cavia porcellus<br>GN=GHITM PE=4 SV=1                                                       | CAVPO | 3 |
| 1700 | 5.75 | 5.96 | 22.43 | 15.33 | 13.27 | tr H0VS05 H0VS05_CAVPO | Uncharacterized protein (Fragment) OS=Cavia<br>porcellus GN=AMER2 PE=4 SV=1                                            | CAVPO | 4 |
| 1701 | 5.74 | 5.8  | 28.32 | 28.32 | 28.32 | tr H0UUV7 H0UUV7_CAVPO | Dolichyl-diphosphooligosaccharide--protein<br>glycosyltransferase subunit DAD1 OS=Cavia<br>porcellus GN=DAD1 PE=3 SV=1 | CAVPO | 3 |
| 1702 | 5.74 | 6.01 | 14.18 | 9.929 | 3.445 | tr H0UY84 H0UY84_CAVPO | Uncharacterized protein (Fragment) OS=Cavia<br>porcellus GN=Golga2 PE=4 SV=1                                           | CAVPO | 3 |
| 1703 | 5.73 | 5.94 | 15.53 | 13.27 | 5.502 | tr H0V3F8 H0V3F8_CAVPO | Uncharacterized protein OS=Cavia porcellus<br>GN=ETFDH PE=4 SV=1                                                       | CAVPO | 3 |
| 1704 | 5.72 | 5.8  | 20.21 | 11.45 | 7.156 | tr H0VAC3 H0VAC3_CAVPO | Uncharacterized protein OS=Cavia porcellus<br>GN=DNAJC11 PE=4 SV=1                                                     | CAVPO | 3 |
| 1705 | 5.72 | 5.93 | 68.29 | 68.29 | 68.29 | tr H0W408 H0W408_CAVPO | Uncharacterized protein OS=Cavia porcellus<br>GN=UQCRQ PE=4 SV=1                                                       | CAVPO | 7 |
| 1706 | 5.72 | 5.8  | 16.46 | 14.35 | 14.35 | tr H0WB85 H0WB85_CAVPO | Uncharacterized protein OS=Cavia porcellus<br>GN=Srsf10 PE=4 SV=1                                                      | CAVPO | 3 |
| 1707 | 5.71 | 5.93 | 28.57 | 24.88 | 16.59 | tr H0VQX8 H0VQX8_CAVPO | Uncharacterized protein (Fragment) OS=Cavia<br>porcellus GN=Tpd52l2 PE=4 SV=1                                          | CAVPO | 3 |
| 1708 | 5.7  | 5.83 | 16.74 | 8.748 | 7.541 | tr H0UTL4 H0UTL4_CAVPO | Uncharacterized protein OS=Cavia porcellus<br>GN=SPG20 PE=4 SV=1                                                       | CAVPO | 3 |
| 1709 | 5.7  | 5.74 | 38    | 38    | 38    | tr H0UWE8 H0UWE8_CAVPO | Uncharacterized protein OS=Cavia porcellus                                                                             | CAVPO | 6 |

|      |      |      |       |       |       |                        |                                                                               |       |   |
|------|------|------|-------|-------|-------|------------------------|-------------------------------------------------------------------------------|-------|---|
|      |      |      |       |       |       |                        | GN=CEND1 PE=4 SV=1                                                            |       |   |
| 1710 | 5.7  | 5.89 | 23.57 | 14.26 | 7.034 | tr H0VDD6 H0VDD6_CAVPO | Uncharacterized protein OS=Cavia porcellus<br>GN=OXSR1 PE=4 SV=1              | CAVPO | 3 |
| 1711 | 5.69 | 5.83 | 60.2  | 50    | 50    | tr H0VPK3 H0VPK3_CAVPO | Uncharacterized protein (Fragment) OS=Cavia<br>porcellus GN=DYNLRB1 PE=4 SV=1 | CAVPO | 3 |
| 1712 | 5.69 | 5.97 | 20.96 | 16.17 | 14.12 | tr H0WCB3 H0WCB3_CAVPO | Uncharacterized protein OS=Cavia porcellus<br>GN=GCDH PE=3 SV=1               | CAVPO | 4 |
| 1713 | 5.68 | 5.81 | 26.8  | 14.95 | 11.65 | tr H0V0Z1 H0V0Z1_CAVPO | Uncharacterized protein OS=Cavia porcellus<br>GN=PLRG1 PE=4 SV=1              | CAVPO | 3 |
| 1714 | 5.68 | 5.75 | 10.34 | 6.466 | 6.466 | tr H0WBF9 H0WBF9_CAVPO | Uncharacterized protein OS=Cavia porcellus<br>GN=LSM14A PE=4 SV=1             | CAVPO | 3 |
| 1715 | 5.67 | 5.77 | 54.9  | 54.9  | 49.02 | tr H0V8B7 H0V8B7_CAVPO | Uncharacterized protein OS=Cavia porcellus<br>GN=LSM3 PE=4 SV=1               | CAVPO | 4 |
| 1716 | 5.67 | 5.75 | 63.36 | 54.96 | 41.98 | tr H0VR11 H0VR11_CAVPO | Uncharacterized protein OS=Cavia porcellus<br>GN=NDUFB7 PE=4 SV=1             | CAVPO | 5 |
| 1717 | 5.66 | 12.3 | 44.59 | 34.39 | 28.34 | tr H0W492 H0W492_CAVPO | Uncharacterized protein (Fragment) OS=Cavia<br>porcellus GN=GNA11 PE=4 SV=1   | CAVPO | 8 |
| 1718 | 5.65 | 5.91 | 27.42 | 19.86 | 16.08 | tr H0V1D7 H0V1D7_CAVPO | Uncharacterized protein OS=Cavia porcellus<br>GN=AP1M1 PE=4 SV=1              | CAVPO | 5 |
| 1719 | 5.65 | 5.75 | 40.91 | 40.91 | 40.91 | tr H0W1J3 H0W1J3_CAVPO | Uncharacterized protein (Fragment) OS=Cavia<br>porcellus GN=RBM8A PE=4 SV=1   | CAVPO | 4 |
| 1720 | 5.65 | 5.76 | 20.07 | 15.14 | 15.14 | tr H0W3P4 H0W3P4_CAVPO | Uncharacterized protein (Fragment) OS=Cavia<br>porcellus GN=UBE2Z PE=4 SV=1   | CAVPO | 4 |
| 1721 | 5.63 | 5.7  | 27.18 | 20.58 | 20.58 | tr H0VC46 H0VC46_CAVPO | Uncharacterized protein (Fragment) OS=Cavia<br>porcellus GN=RAD23A PE=4 SV=1  | CAVPO | 3 |
| 1722 | 5.63 | 7.81 | 34.83 | 22.47 | 22.47 | tr H0VHK3 H0VHK3_CAVPO | Uncharacterized protein (Fragment) OS=Cavia<br>porcellus GN=TRA2A PE=4 SV=1   | CAVPO | 8 |

|      |      |      |       |       |       |                        |                                                                             |       |    |
|------|------|------|-------|-------|-------|------------------------|-----------------------------------------------------------------------------|-------|----|
| 1723 | 5.63 | 5.78 | 40.49 | 36.81 | 19.63 | tr H0W525 H0W525_CAVPO | Uncharacterized protein (Fragment) OS=Cavia porcellus GN=NDUFA13 PE=4 SV=1  | CAVPO | 3  |
| 1724 | 5.62 | 5.8  | 8.663 | 7.533 | 6.026 | tr H0VG88 H0VG88_CAVPO | Uncharacterized protein (Fragment) OS=Cavia porcellus GN=CSPG5 PE=4 SV=1    | CAVPO | 3  |
| 1725 | 5.61 | 12.3 | 45.29 | 29.58 | 16.75 | tr H0UYM7 H0UYM7_CAVPO | Uncharacterized protein OS=Cavia porcellus GN=PPM1A PE=3 SV=1               | CAVPO | 7  |
| 1726 | 5.6  | 5.73 | 18.75 | 15.87 | 7.372 | tr H0VJB8 H0VJB8_CAVPO | Uncharacterized protein OS=Cavia porcellus GN=Papss1 PE=4 SV=1              | CAVPO | 3  |
| 1727 | 5.6  | 5.93 | 60.29 | 50    | 45.59 | tr H0VLQ4 H0VLQ4_CAVPO | Histone H3 OS=Cavia porcellus GN=LOC100735425 PE=3 SV=1                     | CAVPO | 11 |
| 1728 | 5.59 | 5.87 | 15.24 | 15.24 | 9.959 | tr H0UVF0 H0UVF0_CAVPO | Uncharacterized protein OS=Cavia porcellus GN=Mlycd PE=4 SV=1               | CAVPO | 3  |
| 1729 | 5.58 | 5.79 | 16.45 | 14.04 | 14.04 | tr H0UYC3 H0UYC3_CAVPO | Adenylosuccinate synthetase (Fragment) OS=Cavia porcellus GN=ADSS PE=3 SV=1 | CAVPO | 4  |
| 1730 | 5.57 | 5.9  | 12.07 | 7.462 | 4.243 | tr H0V5D0 H0V5D0_CAVPO | Tyrosine-protein kinase receptor OS=Cavia porcellus GN=IGF1R PE=3 SV=1      | CAVPO | 5  |
| 1731 | 5.57 | 5.7  | 16.83 | 10    | 5.167 | tr H0V9F9 H0V9F9_CAVPO | Uncharacterized protein OS=Cavia porcellus GN=GLMN PE=4 SV=1                | CAVPO | 3  |
| 1732 | 5.57 | 5.63 | 16.81 | 13.11 | 13.11 | tr H0VBP5 H0VBP5_CAVPO | Uncharacterized protein OS=Cavia porcellus GN=EIF2B2 PE=3 SV=1              | CAVPO | 3  |
| 1733 | 5.56 | 5.65 | 31.73 | 24.5  | 16.87 | tr H0V6E1 H0V6E1_CAVPO | Uncharacterized protein OS=Cavia porcellus GN=CHTOP PE=4 SV=1               | CAVPO | 3  |
| 1734 | 5.56 | 5.78 | 15.02 | 10.41 | 8.362 | tr H0VP48 H0VP48_CAVPO | CTP synthase OS=Cavia porcellus GN=CTPS2 PE=3 SV=1                          | CAVPO | 4  |
| 1735 | 5.55 | 5.91 | 31.48 | 19.5  | 7.799 | tr H0UZY8 H0UZY8_CAVPO | Uncharacterized protein (Fragment) OS=Cavia porcellus GN=RPL4 PE=4 SV=1     | CAVPO | 3  |
| 1736 | 5.54 | 5.61 | 29.96 | 24.05 | 14.35 | tr H0UT97 H0UT97_CAVPO | Uncharacterized protein OS=Cavia porcellus GN=THEM4 PE=4 SV=1               | CAVPO | 3  |

|      |      |      |       |       |       |                        |                                                                              |       |   |
|------|------|------|-------|-------|-------|------------------------|------------------------------------------------------------------------------|-------|---|
| 1737 | 5.54 | 5.75 | 34.19 | 21.61 | 16.45 | tr H0V6I5 H0V6I5_CAVPO | Uncharacterized protein OS=Cavia porcellus<br>GN=PSMD14 PE=4 SV=1            | CAVPO | 5 |
| 1738 | 5.54 | 5.73 | 25.78 | 23.11 | 23.11 | tr H0VM51 H0VM51_CAVPO | Uncharacterized protein OS=Cavia porcellus<br>GN=MOB4 PE=4 SV=1              | CAVPO | 4 |
| 1739 | 5.53 | 5.72 | 16.12 | 7.072 | 7.072 | tr H0VAW6 H0VAW6_CAVPO | Uncharacterized protein (Fragment) OS=Cavia<br>porcellus GN=NPLOC4 PE=4 SV=1 | CAVPO | 4 |
| 1740 | 5.53 | 5.59 | 16.12 | 13.43 | 11.04 | tr H0VL10 H0VL10_CAVPO | Uncharacterized protein OS=Cavia porcellus<br>GN=XRCC4 PE=4 SV=1             | CAVPO | 3 |
| 1741 | 5.52 | 5.73 | 10.36 | 10.36 | 6.554 | tr H0VH34 H0VH34_CAVPO | Coronin OS=Cavia porcellus GN=CORO1B<br>PE=3 SV=1                            | CAVPO | 3 |
| 1742 | 5.51 | 5.71 | 16.74 | 8.913 | 5.435 | tr H0UVE4 H0UVE4_CAVPO | Uncharacterized protein OS=Cavia porcellus<br>GN=WDR47 PE=4 SV=1             | CAVPO | 3 |
| 1743 | 5.5  | 5.59 | 32.84 | 31.37 | 19.12 | tr H0WBB4 H0WBB4_CAVPO | Uncharacterized protein OS=Cavia porcellus<br>GN=RPS5 PE=3 SV=1              | CAVPO | 3 |
| 1744 | 5.49 | 5.57 | 6.617 | 3.792 | 3.197 | tr H0V593 H0V593_CAVPO | Uncharacterized protein OS=Cavia porcellus<br>GN=MAPK8IP3 PE=4 SV=1          | CAVPO | 3 |
| 1745 | 5.49 | 5.59 | 20.86 | 20.86 | 16.55 | tr H0W9Y6 H0W9Y6_CAVPO | Uncharacterized protein (Fragment) OS=Cavia<br>porcellus GN=LSM4 PE=4 SV=1   | CAVPO | 3 |
| 1746 | 5.47 | 5.6  | 12.68 | 9.731 | 4.738 | tr H0VI82 H0VI82_CAVPO | Uncharacterized protein OS=Cavia porcellus<br>GN=PNPT1 PE=4 SV=1             | CAVPO | 3 |
| 1747 | 5.47 | 5.72 | 11.6  | 7.797 | 4.533 | tr H0W1K1 H0W1K1_CAVPO | Uncharacterized protein OS=Cavia porcellus<br>GN=ADNP PE=3 SV=1              | CAVPO | 4 |
| 1748 | 5.46 | 5.65 | 22.84 | 12.53 | 12.53 | tr H0V3D3 H0V3D3_CAVPO | Uncharacterized protein OS=Cavia porcellus<br>GN=MAB21L1 PE=4 SV=1           | CAVPO | 4 |
| 1749 | 5.46 | 5.56 | 36.65 | 33.94 | 28.51 | tr H0V681 H0V681_CAVPO | Uncharacterized protein OS=Cavia porcellus<br>GN=VPS28 PE=4 SV=1             | CAVPO | 6 |
| 1750 | 5.46 | 5.56 | 23.85 | 23.85 | 15.9  | tr H0V9N0 H0V9N0_CAVPO | Uncharacterized protein OS=Cavia porcellus<br>GN=C12orf43 PE=4 SV=1          | CAVPO | 3 |

|      |      |      |       |       |       |                        |                                                                             |       |    |
|------|------|------|-------|-------|-------|------------------------|-----------------------------------------------------------------------------|-------|----|
| 1751 | 5.46 | 5.55 | 17.71 | 14.39 | 14.39 | tr H0VPH5 H0VPH5_CAVPO | Uncharacterized protein OS=Cavia porcellus<br>GN=PSMF1 PE=4 SV=1            | CAVPO | 3  |
| 1752 | 5.46 | 5.57 | 45    | 31.87 | 27.5  | tr H0WB05 H0WB05_CAVPO | Uncharacterized protein OS=Cavia porcellus<br>PE=4 SV=1                     | CAVPO | 3  |
| 1753 | 5.45 | 5.54 | 26.2  | 26.2  | 18.78 | tr H0V7D0 H0V7D0_CAVPO | Uncharacterized protein OS=Cavia porcellus<br>GN=CWC15 PE=4 SV=1            | CAVPO | 4  |
| 1754 | 5.43 | 5.48 | 11.68 | 11.4  | 11.4  | tr H0UWC5 H0UWC5_CAVPO | Uncharacterized protein (Fragment) OS=Cavia<br>porcellus GN=TWF1 PE=4 SV=1  | CAVPO | 4  |
| 1755 | 5.43 | 5.6  | 41.58 | 32.63 | 26.32 | tr H0V592 H0V592_CAVPO | Uncharacterized protein OS=Cavia porcellus<br>GN=HN1L PE=4 SV=1             | CAVPO | 3  |
| 1756 | 5.43 | 6.23 | 10.29 | 6.327 | 3.211 | tr H0VB26 H0VB26_CAVPO | Uncharacterized protein OS=Cavia porcellus<br>GN=HERC4 PE=4 SV=1            | CAVPO | 3  |
| 1757 | 5.42 | 25.9 | 42.62 | 38.17 | 36.53 | tr H0VCR5 H0VCR5_CAVPO | Uncharacterized protein OS=Cavia porcellus<br>GN=DDX39A PE=4 SV=1           | CAVPO | 14 |
| 1758 | 5.41 | 5.59 | 19.55 | 12.18 | 9.615 | tr H0V4L8 H0V4L8_CAVPO | Uncharacterized protein OS=Cavia porcellus<br>GN=PRPF38A PE=4 SV=1          | CAVPO | 3  |
| 1759 | 5.41 | 5.64 | 17.87 | 15.37 | 9.067 | tr H0V715 H0V715_CAVPO | Uncharacterized protein (Fragment) OS=Cavia<br>porcellus GN=TRIM2 PE=4 SV=1 | CAVPO | 4  |
| 1760 | 5.41 | 5.71 | 11.15 | 5.874 | 2.825 | tr H0VLY1 H0VLY1_CAVPO | Uncharacterized protein (Fragment) OS=Cavia<br>porcellus GN=ROCK2 PE=4 SV=1 | CAVPO | 3  |
| 1761 | 5.4  | 18.1 | 20.72 | 13.99 | 13.23 | tr H0VJ28 H0VJ28_CAVPO | Uncharacterized protein OS=Cavia porcellus<br>GN=SAFB2 PE=4 SV=1            | CAVPO | 9  |
| 1762 | 5.4  | 5.51 | 18.44 | 9.886 | 9.886 | tr H0W984 H0W984_CAVPO | Uncharacterized protein OS=Cavia porcellus<br>GN=LOC100727060 PE=3 SV=1     | CAVPO | 4  |
| 1763 | 5.38 | 5.56 | 27.56 | 27.56 | 26.92 | tr H0UW86 H0UW86_CAVPO | Uncharacterized protein OS=Cavia porcellus<br>GN=RPL23A PE=3 SV=1           | CAVPO | 4  |
| 1764 | 5.38 | 5.59 | 6.141 | 4.87  | 2.065 | tr H0VDS4 H0VDS4_CAVPO | Uncharacterized protein OS=Cavia porcellus<br>GN=NUP210 PE=4 SV=1           | CAVPO | 3  |



|      |      |      |       |       |       |                        |                                                                                       |       |   |
|------|------|------|-------|-------|-------|------------------------|---------------------------------------------------------------------------------------|-------|---|
| 1765 | 5.38 | 5.63 | 13.43 | 8.277 | 3.125 | tr H0VWT1 H0VWT1_CAVPO | Uncharacterized protein (Fragment) OS=Cavia porcellus GN=SRCIN1 PE=4 SV=1             | CAVPO | 3 |
| 1766 | 5.38 | 5.58 | 42.77 | 28.32 | 19.08 | tr H0WD42 H0WD42_CAVPO | Uncharacterized protein (Fragment) OS=Cavia porcellus GN=UBL4A PE=4 SV=1              | CAVPO | 3 |
| 1767 | 5.37 | 5.8  | 13.66 | 9.247 | 7.849 | tr H0VGI1 H0VGI1_CAVPO | Ubiquitin carboxyl-terminal hydrolase (Fragment) OS=Cavia porcellus GN=USP4 PE=3 SV=1 | CAVPO | 6 |
| 1768 | 5.35 | 5.48 | 26.9  | 19.3  | 11.39 | tr H0UZZ9 H0UZZ9_CAVPO | Uncharacterized protein OS=Cavia porcellus GN=HMOX2 PE=4 SV=1                         | CAVPO | 3 |
| 1769 | 5.35 | 5.68 | 18.01 | 11.14 | 4.922 | tr H0V2X9 H0V2X9_CAVPO | Uncharacterized protein OS=Cavia porcellus GN=CPT1A PE=3 SV=1                         | CAVPO | 3 |
| 1770 | 5.35 | 5.54 | 30.17 | 10.83 | 8.511 | tr H0VHC9 H0VHC9_CAVPO | Uncharacterized protein (Fragment) OS=Cavia porcellus GN=SNW1 PE=4 SV=1               | CAVPO | 3 |
| 1771 | 5.35 | 5.49 | 17.72 | 13.29 | 9.072 | tr H0VL93 H0VL93_CAVPO | Uncharacterized protein OS=Cavia porcellus GN=KCTD8 PE=4 SV=1                         | CAVPO | 3 |
| 1772 | 5.34 | 5.4  | 33.64 | 33.64 | 33.64 | tr Q60479 Q60479_CAVPO | Glutathione peroxidase (Fragment) OS=Cavia porcellus PE=2 SV=1                        | CAVPO | 3 |
| 1773 | 5.33 | 5.4  | 17.89 | 17.89 | 17.37 | tr H0V247 H0V247_CAVPO | Uncharacterized protein OS=Cavia porcellus GN=LZIC PE=4 SV=1                          | CAVPO | 3 |
| 1774 | 5.33 | 5.66 | 28.34 | 19.82 | 15.44 | tr H0V3R2 H0V3R2_CAVPO | Uncharacterized protein OS=Cavia porcellus GN=WIP12 PE=4 SV=1                         | CAVPO | 4 |
| 1775 | 5.33 | 5.6  | 13.48 | 7.961 | 1.746 | tr H0VBK5 H0VBK5_CAVPO | Uncharacterized protein OS=Cavia porcellus GN=FYCO1 PE=4 SV=1                         | CAVPO | 3 |
| 1776 | 5.33 | 5.41 | 25.35 | 25.35 | 17.97 | tr H0VLX8 H0VLX8_CAVPO | GrpE protein homolog OS=Cavia porcellus GN=GRPEL1 PE=3 SV=1                           | CAVPO | 3 |
| 1777 | 5.31 | 5.5  | 12.01 | 12.01 | 5.489 | tr H0VS51 H0VS51_CAVPO | Uncharacterized protein OS=Cavia porcellus GN=Dcaf8 PE=4 SV=1                         | CAVPO | 3 |
| 1778 | 5.28 | 5.59 | 37.83 | 25.51 | 14.96 | tr H0VI70 H0VI70_CAVPO | Uncharacterized protein OS=Cavia porcellus                                            | CAVPO | 3 |

|      |      |      |       |       |       |                        |                                                                                              |       |   |
|------|------|------|-------|-------|-------|------------------------|----------------------------------------------------------------------------------------------|-------|---|
|      |      |      |       |       |       |                        | GN=CCDC104 PE=4 SV=1                                                                         |       |   |
| 1779 | 5.27 | 5.52 | 18.61 | 18.61 | 18.61 | tr H0UTH3 H0UTH3_CAVPO | Uncharacterized protein OS=Cavia porcellus<br>GN=NECAP1 PE=4 SV=1                            | CAVPO | 4 |
| 1780 | 5.25 | 5.37 | 36.82 | 29.71 | 12.13 | tr H0V0N8 H0V0N8_CAVPO | Adenylate kinase 2, mitochondrial OS=Cavia<br>porcellus GN=AK2 PE=3 SV=1                     | CAVPO | 2 |
| 1781 | 5.25 | 5.85 | 32.23 | 18.48 | 12.56 | tr H0W5F3 H0W5F3_CAVPO | Perilipin OS=Cavia porcellus GN=PLIN3 PE=3<br>SV=1                                           | CAVPO | 4 |
| 1782 | 5.24 | 5.29 | 7.519 | 7.519 | 7.519 | tr H0VAH5 H0VAH5_CAVPO | Uncharacterized protein OS=Cavia porcellus<br>GN=RRAGC PE=4 SV=1                             | CAVPO | 3 |
| 1783 | 5.23 | 5.33 | 25.84 | 22.47 | 22.47 | tr H0VY68 H0VY68_CAVPO | Uncharacterized protein OS=Cavia porcellus<br>GN=PRAF2 PE=4 SV=1                             | CAVPO | 3 |
| 1784 | 5.22 | 5.8  | 26.78 | 26.78 | 20.77 | tr H0VWB2 H0VWB2_CAVPO | Uncharacterized protein (Fragment) OS=Cavia<br>porcellus GN=ARL1 PE=3 SV=1                   | CAVPO | 4 |
| 1785 | 5.2  | 5.38 | 28.1  | 21.9  | 12.75 | tr H0W5X1 H0W5X1_CAVPO | Uncharacterized protein (Fragment) OS=Cavia<br>porcellus GN=PPTC7 PE=4 SV=1                  | CAVPO | 3 |
| 1786 | 5.19 | 5.25 | 9.031 | 6.404 | 6.404 | tr H0VKP2 H0VKP2_CAVPO | Uncharacterized protein (Fragment) OS=Cavia<br>porcellus GN=Nlgn4x PE=4 SV=1                 | CAVPO | 3 |
| 1787 | 5.18 | 13.7 | 8.579 | 5.549 | 4.054 | tr H0UTV0 H0UTV0_CAVPO | Uncharacterized protein OS=Cavia porcellus<br>GN=TLN1 PE=4 SV=1                              | CAVPO | 8 |
| 1788 | 5.18 | 5.25 | 31.21 | 30.64 | 30.64 | tr H0V8V2 H0V8V2_CAVPO | Uncharacterized protein OS=Cavia porcellus<br>GN=SSR4 PE=4 SV=1                              | CAVPO | 4 |
| 1789 | 5.17 | 5.37 | 42.03 | 42.03 | 42.03 | tr H0WB58 H0WB58_CAVPO | Guanine nucleotide-binding protein subunit<br>gamma OS=Cavia porcellus GN=GNGT2 PE=3<br>SV=1 | CAVPO | 6 |
| 1790 | 5.16 | 5.25 | 20.36 | 14.59 | 9.726 | tr H0UWH9 H0UWH9_CAVPO | Uncharacterized protein OS=Cavia porcellus<br>GN=RNF2 PE=4 SV=1                              | CAVPO | 3 |
| 1791 | 5.16 | 7.54 | 7.036 | 3.247 | 1.178 | tr H0V9L0 H0V9L0_CAVPO | Uncharacterized protein OS=Cavia porcellus<br>GN=HTT PE=4 SV=1                               | CAVPO | 3 |

|      |      |      |       |       |       |                        |                                                                                      |       |   |
|------|------|------|-------|-------|-------|------------------------|--------------------------------------------------------------------------------------|-------|---|
| 1792 | 5.15 | 5.27 | 33.77 | 29.22 | 25.32 | tr H0VBH5 H0VBH5_CAVPO | Actin-related protein 2/3 complex subunit 5<br>OS=Cavia porcellus GN=ARPC5 PE=3 SV=1 | CAVPO | 3 |
| 1793 | 5.15 | 5.21 | 29.59 | 24.49 | 24.49 | tr H0VDN3 H0VDN3_CAVPO | Uncharacterized protein OS=Cavia porcellus<br>GN=RER1 PE=4 SV=1                      | CAVPO | 3 |
| 1794 | 5.15 | 5.23 | 44.44 | 34.26 | 34.26 | tr H0VMN3 H0VMN3_CAVPO | Uncharacterized protein OS=Cavia porcellus<br>GN=CISD1 PE=4 SV=1                     | CAVPO | 3 |
| 1795 | 5.15 | 5.37 | 38.51 | 22.99 | 22.99 | tr H0VUA5 H0VUA5_CAVPO | Uncharacterized protein OS=Cavia porcellus<br>GN=Eef1e1 PE=4 SV=1                    | CAVPO | 4 |
| 1796 | 5.15 | 5.2  | 11.01 | 11.01 | 11.01 | tr H0WDV6 H0WDV6_CAVPO | Uncharacterized protein OS=Cavia porcellus<br>GN=Ube2j1 PE=4 SV=1                    | CAVPO | 3 |
| 1797 | 5.13 | 5.22 | 11.17 | 8.576 | 5.178 | tr H0V731 H0V731_CAVPO | Uncharacterized protein OS=Cavia porcellus<br>GN=NXF1 PE=4 SV=1                      | CAVPO | 3 |
| 1798 | 5.13 | 5.92 | 31.27 | 22.08 | 13.9  | tr H0VRF9 H0VRF9_CAVPO | Uncharacterized protein OS=Cavia porcellus<br>GN=Pcbp4 PE=4 SV=1                     | CAVPO | 4 |
| 1799 | 5.12 | 5.38 | 12.18 | 8.576 | 8.576 | tr H0UYA3 H0UYA3_CAVPO | Uncharacterized protein (Fragment) OS=Cavia<br>porcellus GN=TM9SF3 PE=4 SV=1         | CAVPO | 4 |
| 1800 | 5.11 | 5.63 | 17.07 | 10.98 | 6.739 | tr H0VHV2 H0VHV2_CAVPO | Uncharacterized protein OS=Cavia porcellus<br>GN=CASK PE=4 SV=1                      | CAVPO | 5 |
| 1801 | 5.11 | 5.2  | 6.263 | 3.771 | 1.886 | tr H0VY94 H0VY94_CAVPO | Uncharacterized protein OS=Cavia porcellus<br>GN=COL18A1 PE=4 SV=1                   | CAVPO | 3 |
| 1802 | 5.11 | 5.24 | 12.06 | 12.06 | 12.06 | tr H0W479 H0W479_CAVPO | Uncharacterized protein OS=Cavia porcellus<br>GN=RGR PE=4 SV=1                       | CAVPO | 3 |
| 1803 | 5.1  | 5.79 | 18.57 | 14.14 | 7.384 | tr H0UW00 H0UW00_CAVPO | Coronin OS=Cavia porcellus GN=ORO1C<br>PE=3 SV=1                                     | CAVPO | 4 |
| 1804 | 5.1  | 5.31 | 9.78  | 7.579 | 4.89  | tr H0UZW3 H0UZW3_CAVPO | Uncharacterized protein OS=Cavia porcellus<br>GN=PHC2 PE=4 SV=1                      | CAVPO | 3 |
| 1805 | 5.1  | 5.17 | 18.81 | 12.62 | 9.406 | tr H0VFK7 H0VFK7_CAVPO | Uncharacterized protein (Fragment) OS=Cavia<br>porcellus GN=ACADL PE=3 SV=1          | CAVPO | 3 |

|      |      |      |       |       |       |                        |                                                                                  |       |   |
|------|------|------|-------|-------|-------|------------------------|----------------------------------------------------------------------------------|-------|---|
| 1806 | 5.1  | 5.16 | 21.08 | 21.08 | 17.04 | tr H0W4B4 H0W4B4_CAVPO | Uncharacterized protein OS=Cavia porcellus<br>GN=Psm9 PE=4 SV=1                  | CAVPO | 3 |
| 1807 | 5.09 | 5.25 | 29.22 | 28.31 | 28.31 | tr H0V0Y0 H0V0Y0_CAVPO | Uncharacterized protein OS=Cavia porcellus<br>GN=CHMP5 PE=4 SV=1                 | CAVPO | 5 |
| 1808 | 5.09 | 5.25 | 50    | 48.68 | 48.68 | tr H0VR28 H0VR28_CAVPO | Uncharacterized protein (Fragment) OS=Cavia<br>porcellus GN=COX6C PE=4 SV=1      | CAVPO | 5 |
| 1809 | 5.08 | 5.13 | 25.21 | 25.21 | 25.21 | tr H0VJS8 H0VJS8_CAVPO | Uncharacterized protein (Fragment) OS=Cavia<br>porcellus GN=RPS20 PE=3 SV=1      | CAVPO | 3 |
| 1810 | 5.07 | 5.18 | 22.41 | 18.46 | 7.884 | tr H0UUW0 H0UUW0_CAVPO | Glycylpeptide N-tetradecanoyltransferase<br>OS=Cavia porcellus GN=NMT1 PE=3 SV=1 | CAVPO | 3 |
| 1811 | 5.06 | 5.26 | 10.51 | 6.226 | 3.502 | tr H0V3K9 H0V3K9_CAVPO | Uncharacterized protein OS=Cavia porcellus<br>GN=LLGL2 PE=4 SV=1                 | CAVPO | 3 |
| 1812 | 5.04 | 5.11 | 21.1  | 17.43 | 11.62 | tr H0VK95 H0VK95_CAVPO | Nucleoporin NUP53 OS=Cavia porcellus<br>GN=NUP35 PE=3 SV=1                       | CAVPO | 3 |
| 1813 | 5.03 | 5.41 | 25.29 | 22.41 | 22.41 | tr H0V931 H0V931_CAVPO | Uncharacterized protein OS=Cavia porcellus<br>GN=UBE2E3 PE=3 SV=1                | CAVPO | 4 |
| 1814 | 5.02 | 5.33 | 23.48 | 14.6  | 9.982 | tr H0VB21 H0VB21_CAVPO | Uncharacterized protein OS=Cavia porcellus<br>GN=SNX27 PE=4 SV=1                 | CAVPO | 4 |
| 1815 | 5.02 | 5.09 | 86.67 | 86.67 | 86.67 | tr H0VUI8 H0VUI8_CAVPO | Uncharacterized protein (Fragment) OS=Cavia<br>porcellus GN=HINT1 PE=4 SV=1      | CAVPO | 4 |
| 1816 | 5.01 | 5.35 | 7.818 | 4.351 | 3.216 | tr H0VRE8 H0VRE8_CAVPO | Uncharacterized protein OS=Cavia porcellus<br>GN=SCRIB PE=4 SV=1                 | CAVPO | 4 |
| 1817 | 5.01 | 5.11 | 14.15 | 14.15 | 10.38 | tr H0W7P0 H0W7P0_CAVPO | Uncharacterized protein OS=Cavia porcellus<br>GN=RDH5 PE=3 SV=1                  | CAVPO | 3 |
| 1818 | 5    | 5.29 | 11.95 | 6.501 | 4.876 | tr H0UX90 H0UX90_CAVPO | Uncharacterized protein OS=Cavia porcellus<br>GN=UBA6 PE=4 SV=1                  | CAVPO | 6 |
| 1819 | 5    | 5.1  | 10.42 | 6.713 | 6.713 | tr H0V8Q2 H0V8Q2_CAVPO | Uncharacterized protein (Fragment) OS=Cavia<br>porcellus GN=KRT14 PE=3 SV=1      | CAVPO | 3 |

|      |      |      |       |       |       |                        |                                                                               |       |    |
|------|------|------|-------|-------|-------|------------------------|-------------------------------------------------------------------------------|-------|----|
| 1820 | 5    | 5.29 | 15.56 | 6.358 | 5.385 | tr H0VJG7 H0VJG7_CAVPO | Uncharacterized protein OS=Cavia porcellus<br>GN=PDS5A PE=4 SV=1              | CAVPO | 5  |
| 1821 | 5    | 18.7 | 50.53 | 40.43 | 33.78 | tr H0VSV0 H0VSV0_CAVPO | Uncharacterized protein OS=Cavia porcellus<br>GN=ACTR1B PE=3 SV=1             | CAVPO | 11 |
| 1822 | 4.99 | 5.07 | 38.37 | 29.65 | 25    | tr H0UVK3 H0UVK3_CAVPO | Uncharacterized protein OS=Cavia porcellus<br>GN=POLR2G PE=4 SV=1             | CAVPO | 3  |
| 1823 | 4.99 | 5.1  | 15.2  | 7.281 | 7.281 | tr H0V3B3 H0V3B3_CAVPO | Uncharacterized protein OS=Cavia porcellus<br>GN=IGSF21 PE=4 SV=1             | CAVPO | 3  |
| 1824 | 4.99 | 5.56 | 12.94 | 11.06 | 9.186 | tr H0V446 H0V446_CAVPO | Uncharacterized protein (Fragment) OS=Cavia<br>porcellus GN=SEC61A1 PE=3 SV=1 | CAVPO | 4  |
| 1825 | 4.97 | 5.06 | 22.71 | 20.35 | 12.39 | tr H0V7P8 H0V7P8_CAVPO | Annexin OS=Cavia porcellus GN=ANXA2<br>PE=3 SV=1                              | CAVPO | 3  |
| 1826 | 4.97 | 5.25 | 14.6  | 12.13 | 5.569 | tr H0W8V2 H0W8V2_CAVPO | Uncharacterized protein OS=Cavia porcellus<br>GN=IWS1 PE=4 SV=1               | CAVPO | 3  |
| 1827 | 4.96 | 5.1  | 21.78 | 11.94 | 7.494 | tr H0V866 H0V866_CAVPO | Uncharacterized protein (Fragment) OS=Cavia<br>porcellus GN=STK24 PE=4 SV=1   | CAVPO | 3  |
| 1828 | 4.96 | 5.13 | 30.52 | 29.87 | 29.87 | tr H0VAU2 H0VAU2_CAVPO | Uncharacterized protein OS=Cavia porcellus<br>GN=KCTD12 PE=4 SV=1             | CAVPO | 4  |
| 1829 | 4.95 | 5.02 | 29.09 | 25.82 | 22.18 | tr H0UTM8 H0UTM8_CAVPO | Uncharacterized protein OS=Cavia porcellus<br>GN=COPS7A PE=4 SV=1             | CAVPO | 4  |
| 1830 | 4.95 | 5.01 | 13.23 | 10.58 | 10.58 | tr H0VI39 H0VI39_CAVPO | Uncharacterized protein OS=Cavia porcellus<br>GN=REEP5 PE=4 SV=1              | CAVPO | 3  |
| 1831 | 4.95 | 5.04 | 25.49 | 15.2  | 12.25 | tr H0VZ51 H0VZ51_CAVPO | Uncharacterized protein OS=Cavia porcellus<br>GN=RPL13A PE=3 SV=1             | CAVPO | 3  |
| 1832 | 4.95 | 5.14 | 39.57 | 24.06 | 12.83 | tr H0W154 H0W154_CAVPO | Uncharacterized protein OS=Cavia porcellus<br>GN=C17orf62 PE=4 SV=1           | CAVPO | 3  |
| 1833 | 4.94 | 5.01 | 27.04 | 27.04 | 20.75 | tr H0UZQ0 H0UZQ0_CAVPO | Uncharacterized protein (Fragment) OS=Cavia<br>porcellus GN=NDUFB11 PE=4 SV=1 | CAVPO | 3  |

|      |      |      |       |       |       |                        |                                                                             |       |   |
|------|------|------|-------|-------|-------|------------------------|-----------------------------------------------------------------------------|-------|---|
| 1834 | 4.94 | 5.35 | 16.96 | 10.24 | 7.93  | tr H0V7T5 H0V7T5_CAVPO | Uncharacterized protein (Fragment) OS=Cavia porcellus GN=ALDH1L1 PE=3 SV=1  | CAVPO | 5 |
| 1835 | 4.93 | 5.01 | 12.58 | 10.41 | 7.809 | tr H0V7U7 H0V7U7_CAVPO | Uncharacterized protein OS=Cavia porcellus GN=RGS7 PE=4 SV=1                | CAVPO | 3 |
| 1836 | 4.93 | 4.99 | 27.23 | 24.11 | 24.11 | tr H0W756 H0W756_CAVPO | Uncharacterized protein (Fragment) OS=Cavia porcellus GN=FAHD1 PE=4 SV=1    | CAVPO | 3 |
| 1837 | 4.92 | 11.3 | 34.43 | 34.43 | 32.79 | tr H0VIX9 H0VIX9_CAVPO | Uncharacterized protein (Fragment) OS=Cavia porcellus GN=YBX3 PE=4 SV=1     | CAVPO | 7 |
| 1838 | 4.92 | 4.97 | 31.87 | 20    | 20    | tr H0VJC2 H0VJC2_CAVPO | Uncharacterized protein (Fragment) OS=Cavia porcellus GN=C1orf123 PE=4 SV=1 | CAVPO | 3 |
| 1839 | 4.92 | 6.78 | 20.39 | 15.92 | 10.12 | tr H0W828 H0W828_CAVPO | Uncharacterized protein OS=Cavia porcellus GN=FXR2 PE=4 SV=1                | CAVPO | 5 |
| 1840 | 4.91 | 5.14 | 26.74 | 17.67 | 10.93 | tr H0UVR9 H0UVR9_CAVPO | Uncharacterized protein OS=Cavia porcellus GN=Eif5 PE=4 SV=1                | CAVPO | 4 |
| 1841 | 4.91 | 4.96 | 26.67 | 26.67 | 26.67 | tr H0V9W8 H0V9W8_CAVPO | Uncharacterized protein OS=Cavia porcellus GN=POLR2H PE=4 SV=1              | CAVPO | 3 |
| 1842 | 4.91 | 8.3  | 7.456 | 3.651 | 2.537 | tr H0VH35 H0VH35_CAVPO | Uncharacterized protein OS=Cavia porcellus GN=FLNB PE=4 SV=1                | CAVPO | 6 |
| 1843 | 4.91 | 5.04 | 39.52 | 28.14 | 22.75 | tr H0VXL0 H0VXL0_CAVPO | Uncharacterized protein OS=Cavia porcellus GN=CGGBP1 PE=4 SV=1              | CAVPO | 3 |
| 1844 | 4.9  | 5.03 | 33.24 | 22.79 | 10.72 | tr H0UTA9 H0UTA9_CAVPO | Uncharacterized protein OS=Cavia porcellus GN=MECR PE=4 SV=1                | CAVPO | 2 |
| 1845 | 4.9  | 5.03 | 22.34 | 12.71 | 12.71 | tr H0V6R0 H0V6R0_CAVPO | Uncharacterized protein OS=Cavia porcellus GN=NMRAL1 PE=4 SV=1              | CAVPO | 3 |
| 1846 | 4.89 | 5.05 | 34.98 | 31.39 | 31.39 | tr H0V7J9 H0V7J9_CAVPO | Uncharacterized protein OS=Cavia porcellus GN=SMNDC1 PE=4 SV=1              | CAVPO | 4 |
| 1847 | 4.89 | 5.08 | 27.54 | 24.06 | 19.25 | tr H0VRC9 H0VRC9_CAVPO | Uncharacterized protein OS=Cavia porcellus GN=PEX14 PE=4 SV=1               | CAVPO | 3 |

|      |      |      |       |       |       |                        |                                                                               |       |   |
|------|------|------|-------|-------|-------|------------------------|-------------------------------------------------------------------------------|-------|---|
| 1848 | 4.88 | 5.16 | 22.01 | 18.53 | 10.04 | tr H0VUP1 H0VUP1_CAVPO | Uncharacterized protein OS=Cavia porcellus<br>GN=DNAJC9 PE=4 SV=1             | CAVPO | 3 |
| 1849 | 4.88 | 4.94 | 17.06 | 17.06 | 17.06 | tr H0W2S4 H0W2S4_CAVPO | Uncharacterized protein OS=Cavia porcellus<br>GN=REEP6 PE=4 SV=1              | CAVPO | 3 |
| 1850 | 4.87 | 6.41 | 24.62 | 19.08 | 19.08 | tr H0UTP9 H0UTP9_CAVPO | Uncharacterized protein (Fragment) OS=Cavia<br>porcellus GN=KHDRBS3 PE=4 SV=1 | CAVPO | 5 |
| 1851 | 4.87 | 5.04 | 22.89 | 13.81 | 10.1  | tr H0VJ14 H0VJ14_CAVPO | Uncharacterized protein (Fragment) OS=Cavia<br>porcellus GN=UBXN4 PE=4 SV=1   | CAVPO | 3 |
| 1852 | 4.86 | 5.09 | 15.66 | 14.41 | 14.41 | tr H0V3E8 H0V3E8_CAVPO | Uncharacterized protein OS=Cavia porcellus<br>GN=PI4K2A PE=4 SV=1             | CAVPO | 4 |
| 1853 | 4.86 | 4.98 | 17.6  | 14    | 14    | tr H0VPJ6 H0VPJ6_CAVPO | Uncharacterized protein OS=Cavia porcellus<br>GN=SBDS PE=4 SV=1               | CAVPO | 3 |
| 1854 | 4.85 | 5.06 | 25.05 | 13.32 | 11.13 | tr H0V1G8 H0V1G8_CAVPO | Uncharacterized protein OS=Cavia porcellus<br>GN=SRP54 PE=3 SV=1              | CAVPO | 4 |
| 1855 | 4.85 | 7.29 | 18.27 | 11.96 | 11.96 | tr H0VES7 H0VES7_CAVPO | Uncharacterized protein OS=Cavia porcellus<br>GN=PDCL PE=4 SV=1               | CAVPO | 5 |
| 1856 | 4.85 | 5.02 | 24.87 | 24.87 | 15.28 | tr H0VFQ1 H0VFQ1_CAVPO | Uncharacterized protein (Fragment) OS=Cavia<br>porcellus GN=UBA5 PE=4 SV=1    | CAVPO | 3 |
| 1857 | 4.84 | 4.9  | 11.2  | 7.662 | 7.662 | tr H0UTB2 H0UTB2_CAVPO | Uncharacterized protein OS=Cavia porcellus<br>GN=NUP54 PE=4 SV=1              | CAVPO | 3 |
| 1858 | 4.84 | 4.89 | 50.47 | 50.47 | 50.47 | tr H0VDP4 H0VDP4_CAVPO | Uncharacterized protein OS=Cavia porcellus<br>GN=C19orf25 PE=4 SV=1           | CAVPO | 3 |
| 1859 | 4.84 | 5.33 | 5.998 | 4.405 | 3.28  | tr H0VN42 H0VN42_CAVPO | Uncharacterized protein OS=Cavia porcellus<br>GN=UBE4A PE=4 SV=1              | CAVPO | 3 |
| 1860 | 4.84 | 5.01 | 29.6  | 20.58 | 13.72 | tr H0VQW2 H0VQW2_CAVPO | Uncharacterized protein OS=Cavia porcellus<br>GN=MLEC PE=4 SV=1               | CAVPO | 3 |
| 1861 | 4.82 | 5.15 | 43.13 | 34.6  | 15.64 | tr H0VCT1 H0VCT1_CAVPO | Uncharacterized protein OS=Cavia porcellus<br>GN=PITHD1 PE=4 SV=1             | CAVPO | 3 |

|      |      |      |       |       |       |                        |                                                                                                        |       |    |
|------|------|------|-------|-------|-------|------------------------|--------------------------------------------------------------------------------------------------------|-------|----|
| 1862 | 4.82 | 5.18 | 10.03 | 10.03 | 7.326 | tr H0VFS6 H0VFS6_CAVPO | Uncharacterized protein OS=Cavia porcellus<br>GN=QRICH1 PE=4 SV=1                                      | CAVPO | 4  |
| 1863 | 4.81 | 4.9  | 70.67 | 62.67 | 56    | tr H0UVY0 H0UVY0_CAVPO | Guanine nucleotide-binding protein subunit<br>gamma (Fragment) OS=Cavia porcellus<br>GN=GNG2 PE=3 SV=1 | CAVPO | 6  |
| 1864 | 4.8  | 4.9  | 29.44 | 16.5  | 6.345 | tr H0VIX1 H0VIX1_CAVPO | Uncharacterized protein OS=Cavia porcellus<br>GN=SIRT2 PE=4 SV=1                                       | CAVPO | 2  |
| 1865 | 4.8  | 4.87 | 15.79 | 13.16 | 10.53 | tr H0VSK5 H0VSK5_CAVPO | Uncharacterized protein OS=Cavia porcellus<br>GN=DCAF7 PE=4 SV=1                                       | CAVPO | 3  |
| 1866 | 4.8  | 17.5 | 46.02 | 42.61 | 42.61 | tr H0VZG7 H0VZG7_CAVPO | Uncharacterized protein (Fragment) OS=Cavia<br>porcellus GN=ANP32B PE=4 SV=1                           | CAVPO | 14 |
| 1867 | 4.79 | 4.9  | 17.72 | 12.22 | 4.277 | tr H0VT64 H0VT64_CAVPO | Uncharacterized protein OS=Cavia porcellus<br>GN=Rabgef1 PE=4 SV=1                                     | CAVPO | 2  |
| 1868 | 4.78 | 4.87 | 15.71 | 15.24 | 6.905 | tr H0UYM8 H0UYM8_CAVPO | Uncharacterized protein OS=Cavia porcellus<br>GN=GMPPA PE=4 SV=1                                       | CAVPO | 2  |
| 1869 | 4.77 | 4.91 | 13.03 | 7.563 | 7.563 | tr H0VTF9 H0VTF9_CAVPO | Uncharacterized protein OS=Cavia porcellus<br>GN=CPE PE=4 SV=1                                         | CAVPO | 4  |
| 1870 | 4.77 | 4.82 | 18.82 | 18.82 | 18.82 | tr Q9JHM1 Q9JHM1_CAVPO | Glutathione peroxidase OS=Cavia porcellus<br>GN=GP-GPx4 PE=2 SV=2                                      | CAVPO | 3  |
| 1871 | 4.76 | 4.88 | 10.38 | 8.197 | 8.197 | tr H0V8T1 H0V8T1_CAVPO | Uncharacterized protein (Fragment) OS=Cavia<br>porcellus GN=UBFD1 PE=4 SV=1                            | CAVPO | 3  |
| 1872 | 4.76 | 4.97 | 18.26 | 12.58 | 10.55 | tr H0W0L8 H0W0L8_CAVPO | Uncharacterized protein OS=Cavia porcellus<br>GN=DNAJC7 PE=4 SV=1                                      | CAVPO | 4  |
| 1873 | 4.76 | 5    | 26.63 | 6.699 | 6.699 | tr H0WDC2 H0WDC2_CAVPO | Uncharacterized protein OS=Cavia porcellus<br>GN=KBTBD11 PE=4 SV=1                                     | CAVPO | 4  |
| 1874 | 4.75 | 4.89 | 40.91 | 26.36 | 26.36 | tr H0VLW3 H0VLW3_CAVPO | Uncharacterized protein OS=Cavia porcellus<br>GN=PHF5A PE=4 SV=1                                       | CAVPO | 3  |
| 1875 | 4.75 | 4.91 | 25.37 | 14.16 | 9.735 | tr H0VR09 H0VR09_CAVPO | Uncharacterized protein OS=Cavia porcellus                                                             | CAVPO | 3  |



|      |      |      |       |       |       |                        |                                                                              |       |   |
|------|------|------|-------|-------|-------|------------------------|------------------------------------------------------------------------------|-------|---|
|      |      |      |       |       |       |                        | GN=DNAJB1 PE=4 SV=1                                                          |       |   |
| 1876 | 4.74 | 4.9  | 47.62 | 34.69 | 22.45 | tr H0VNH9 H0VNH9_CAVPO | Uncharacterized protein OS=Cavia porcellus<br>GN=NUDT2 PE=3 SV=1             | CAVPO | 3 |
| 1877 | 4.74 | 4.84 | 15.38 | 8.524 | 2.703 | tr H0VZS6 H0VZS6_CAVPO | Uncharacterized protein (Fragment) OS=Cavia<br>porcellus GN=CTNND2 PE=4 SV=1 | CAVPO | 2 |
| 1878 | 4.72 | 4.84 | 13.02 | 8.58  | 8.58  | tr H0V4D3 H0V4D3_CAVPO | Uncharacterized protein (Fragment) OS=Cavia<br>porcellus GN=NFYC PE=4 SV=1   | CAVPO | 3 |
| 1879 | 4.72 | 4.85 | 9.158 | 9.158 | 9.158 | tr H0V9F8 H0V9F8_CAVPO | Uncharacterized protein OS=Cavia porcellus<br>GN=PEF1 PE=4 SV=1              | CAVPO | 3 |
| 1880 | 4.72 | 4.91 | 16.09 | 13.86 | 7.178 | tr H0VB53 H0VB53_CAVPO | Uncharacterized protein OS=Cavia porcellus<br>GN=SNX5 PE=4 SV=1              | CAVPO | 3 |
| 1881 | 4.71 | 5.03 | 22.99 | 22.99 | 13.37 | tr H0V2L2 H0V2L2_CAVPO | Uncharacterized protein (Fragment) OS=Cavia<br>porcellus GN=APOO PE=4 SV=1   | CAVPO | 2 |
| 1882 | 4.71 | 4.77 | 29.14 | 29.14 | 22.86 | tr H0W524 H0W524_CAVPO | Uncharacterized protein OS=Cavia porcellus<br>GN=C19orf43 PE=4 SV=1          | CAVPO | 3 |
| 1883 | 4.7  | 4.97 | 10.37 | 6.786 | 3.841 | tr H0V1P7 H0V1P7_CAVPO | Uncharacterized protein (Fragment) OS=Cavia<br>porcellus GN=SMEK1 PE=4 SV=1  | CAVPO | 3 |
| 1884 | 4.68 | 4.73 | 37.66 | 22.08 | 22.08 | tr H0UVJ3 H0UVJ3_CAVPO | Uncharacterized protein OS=Cavia porcellus<br>GN=ISCA2 PE=4 SV=1             | CAVPO | 3 |
| 1885 | 4.68 | 4.85 | 30.17 | 30.17 | 30.17 | tr H0UWZ8 H0UWZ8_CAVPO | Uncharacterized protein OS=Cavia porcellus<br>GN=HDDC3 PE=4 SV=1             | CAVPO | 4 |
| 1886 | 4.67 | 4.88 | 28.88 | 21.88 | 10.33 | tr H0UUF2 H0UUF2_CAVPO | Uncharacterized protein OS=Cavia porcellus<br>GN=UCHL5 PE=4 SV=1             | CAVPO | 3 |
| 1887 | 4.67 | 4.82 | 40    | 39.13 | 29.57 | tr H0UXL5 H0UXL5_CAVPO | Uncharacterized protein (Fragment) OS=Cavia<br>porcellus GN=Ndufa7 PE=4 SV=1 | CAVPO | 3 |
| 1888 | 4.67 | 4.74 | 10.83 | 9.32  | 2.519 | tr H0V902 H0V902_CAVPO | Uncharacterized protein OS=Cavia porcellus<br>GN=UFL1 PE=4 SV=1              | CAVPO | 2 |

|      |      |      |       |       |       |                        |                                                                                                     |       |   |
|------|------|------|-------|-------|-------|------------------------|-----------------------------------------------------------------------------------------------------|-------|---|
| 1889 | 4.67 | 4.89 | 9.047 | 4.455 | 2.262 | tr H0VKV4 H0VKV4_CAVPO | Uncharacterized protein (Fragment) OS=Cavia porcellus GN=DIP2B PE=4 SV=1                            | CAVPO | 3 |
| 1890 | 4.67 | 4.84 | 17.08 | 5.282 | 5.282 | tr H0VQY1 H0VQY1_CAVPO | Uncharacterized protein (Fragment) OS=Cavia porcellus GN=RABGGTA PE=4 SV=1                          | CAVPO | 3 |
| 1891 | 4.66 | 5.01 | 15.13 | 7.968 | 4.734 | tr H0VN55 H0VN55_CAVPO | Uncharacterized protein OS=Cavia porcellus GN=NAA15 PE=4 SV=1                                       | CAVPO | 4 |
| 1892 | 4.66 | 4.8  | 15.68 | 11.35 | 8.468 | tr H0VSQ3 H0VSQ3_CAVPO | Uncharacterized protein OS=Cavia porcellus GN=PIGS PE=4 SV=1                                        | CAVPO | 3 |
| 1893 | 4.65 | 5.15 | 23.59 | 13.29 | 6.202 | tr H0UTF9 H0UTF9_CAVPO | Uncharacterized protein OS=Cavia porcellus GN=MGEA5 PE=4 SV=1                                       | CAVPO | 4 |
| 1894 | 4.65 | 9.71 | 14.46 | 11.42 | 11.42 | tr H0WE04 H0WE04_CAVPO | Uncharacterized protein OS=Cavia porcellus GN=PICALM PE=4 SV=1                                      | CAVPO | 6 |
| 1895 | 4.64 | 4.77 | 20    | 14.23 | 14.23 | tr H0WCT9 H0WCT9_CAVPO | Uncharacterized protein OS=Cavia porcellus GN=HAGH PE=3 SV=1                                        | CAVPO | 3 |
| 1896 | 4.63 | 4.7  | 28.8  | 14.24 | 11.39 | tr H0V3V8 H0V3V8_CAVPO | Uncharacterized protein (Fragment) OS=Cavia porcellus GN=DECRI PE=4 SV=1                            | CAVPO | 3 |
| 1897 | 4.62 | 4.75 | 28.74 | 23.95 | 16.17 | tr H0W2P9 H0W2P9_CAVPO | Ubiquitin-fold modifier-conjugating enzyme 1 OS=Cavia porcellus GN=UFC1 PE=3 SV=1                   | CAVPO | 3 |
| 1898 | 4.61 | 5.08 | 20    | 13.44 | 13.44 | tr H0VI22 H0VI22_CAVPO | Uncharacterized protein OS=Cavia porcellus GN=GPM6B PE=4 SV=1                                       | CAVPO | 9 |
| 1899 | 4.59 | 4.63 | 33.33 | 33.33 | 33.33 | tr H0VE12 H0VE12_CAVPO | NADH dehydrogenase [ubiquinone] 1 alpha subcomplex subunit 2 OS=Cavia porcellus GN=NDUFA2 PE=3 SV=1 | CAVPO | 3 |
| 1900 | 4.59 | 4.71 | 28.55 | 13.16 | 4.786 | tr H0VPE1 H0VPE1_CAVPO | Uncharacterized protein OS=Cavia porcellus GN=GAD2 PE=3 SV=1                                        | CAVPO | 2 |
| 1901 | 4.58 | 4.63 | 24.55 | 19.7  | 7.576 | tr H0V1C6 H0V1C6_CAVPO | Uncharacterized protein OS=Cavia porcellus GN=RCN3 PE=4 SV=1                                        | CAVPO | 2 |
| 1902 | 4.57 | 4.83 | 17.16 | 12.38 | 5.116 | tr H0UXH2 H0UXH2_CAVPO | Uncharacterized protein (Fragment) OS=Cavia                                                         | CAVPO | 3 |

|      |      |      |       |       |       |                        |                                                                                   |       |    |
|------|------|------|-------|-------|-------|------------------------|-----------------------------------------------------------------------------------|-------|----|
|      |      |      |       |       |       |                        | porcellus GN=PDE1C PE=4 SV=1                                                      |       |    |
| 1903 | 4.57 | 4.99 | 44    | 32    | 18.29 | tr H0VBM9 H0VBM9_CAVPO | Uncharacterized protein OS=Cavia porcellus<br>GN=ARF6 PE=3 SV=1                   | CAVPO | 5  |
| 1904 | 4.57 | 43.6 | 74.85 | 72.42 | 72.42 | tr Q0QEP1 Q0QEP1_CAVPO | ATP synthase subunit beta (Fragment)<br>OS=Cavia porcellus GN=ATP5B PE=2 SV=1     | CAVPO | 49 |
| 1905 | 4.56 | 12.8 | 37.31 | 37.31 | 32.64 | tr H0W5I4 H0W5I4_CAVPO | Uncharacterized protein OS=Cavia porcellus<br>GN=NCALD PE=4 SV=1                  | CAVPO | 8  |
| 1906 | 4.55 | 4.71 | 17.42 | 9.343 | 4.293 | tr H0VNI0 H0VNI0_CAVPO | Ribonucleoside-diphosphate reductase<br>OS=Cavia porcellus GN=RRM1 PE=3 SV=1      | CAVPO | 3  |
| 1907 | 4.55 | 19.5 | 63.41 | 63.41 | 63.41 | tr H0VTD0 H0VTD0_CAVPO | Uncharacterized protein OS=Cavia porcellus<br>GN=RAB1A PE=3 SV=1                  | CAVPO | 15 |
| 1908 | 4.54 | 6.67 | 16.35 | 13.65 | 7.778 | tr H0UTG7 H0UTG7_CAVPO | Uncharacterized protein (Fragment) OS=Cavia<br>porcellus GN=KLC4 PE=4 SV=1        | CAVPO | 3  |
| 1909 | 4.52 | 4.71 | 21.44 | 9.897 | 7.423 | tr H0WBT1 H0WBT1_CAVPO | Uncharacterized protein OS=Cavia porcellus<br>GN=NAE1 PE=4 SV=1                   | CAVPO | 3  |
| 1910 | 4.52 | 4.63 | 33.91 | 33.91 | 33.91 | tr H0WDD1 H0WDD1_CAVPO | Uncharacterized protein (Fragment) OS=Cavia<br>porcellus GN=Rps26 PE=4 SV=1       | CAVPO | 3  |
| 1911 | 4.51 | 4.63 | 19.8  | 11.22 | 11.22 | tr H0W5B3 H0W5B3_CAVPO | Uncharacterized protein OS=Cavia porcellus<br>GN=STUB1 PE=4 SV=1                  | CAVPO | 3  |
| 1912 | 4.49 | 4.53 | 23.32 | 19.69 | 19.69 | tr H0V2X3 H0V2X3_CAVPO | Uncharacterized protein OS=Cavia porcellus<br>GN=CSRP2 PE=4 SV=1                  | CAVPO | 3  |
| 1913 | 4.49 | 4.6  | 13.33 | 7.619 | 7.619 | tr H0V8E3 H0V8E3_CAVPO | Uncharacterized protein OS=Cavia porcellus<br>GN=CRELD1 PE=4 SV=1                 | CAVPO | 3  |
| 1914 | 4.49 | 4.74 | 24.59 | 22.93 | 17.96 | tr H0WB33 H0WB33_CAVPO | Uroporphyrinogen decarboxylase (Fragment)<br>OS=Cavia porcellus GN=UROD PE=3 SV=1 | CAVPO | 4  |
| 1915 | 4.48 | 4.53 | 17.7  | 15.04 | 7.375 | tr H0UTY8 H0UTY8_CAVPO | Uncharacterized protein (Fragment) OS=Cavia<br>porcellus GN=TMX4 PE=4 SV=1        | CAVPO | 2  |

|      |      |      |       |       |       |                        |                                                                              |       |    |
|------|------|------|-------|-------|-------|------------------------|------------------------------------------------------------------------------|-------|----|
| 1916 | 4.48 | 7.07 | 52.78 | 42.13 | 28.24 | tr H0VX73 H0VX73_CAVPO | Uncharacterized protein OS=Cavia porcellus<br>GN=Rab4b PE=3 SV=1             | CAVPO | 7  |
| 1917 | 4.47 | 4.73 | 13.55 | 11.16 | 6.972 | tr H0V9C5 H0V9C5_CAVPO | Uncharacterized protein (Fragment) OS=Cavia<br>porcellus GN=CSAD PE=3 SV=1   | CAVPO | 3  |
| 1918 | 4.47 | 25.7 | 18.02 | 14.27 | 10.93 | tr H0VM29 H0VM29_CAVPO | Uncharacterized protein OS=Cavia porcellus<br>GN=CYP11B PE=4 SV=1            | CAVPO | 12 |
| 1919 | 4.47 | 4.59 | 47.06 | 28.43 | 28.43 | tr H0W597 H0W597_CAVPO | Uncharacterized protein OS=Cavia porcellus<br>GN=Basp1 PE=4 SV=1             | CAVPO | 5  |
| 1920 | 4.46 | 5.34 | 35.9  | 35.9  | 35.9  | tr H0UUY8 H0UUY8_CAVPO | Uncharacterized protein OS=Cavia porcellus<br>GN=GLRX5 PE=4 SV=1             | CAVPO | 4  |
| 1921 | 4.46 | 4.57 | 11.5  | 11.5  | 8     | tr H0VCX2 H0VCX2_CAVPO | Uncharacterized protein (Fragment) OS=Cavia<br>porcellus GN=Crlf3 PE=4 SV=1  | CAVPO | 3  |
| 1922 | 4.46 | 4.51 | 18.18 | 14.66 | 12.61 | tr H0VHN6 H0VHN6_CAVPO | Uncharacterized protein OS=Cavia porcellus<br>GN=CREB1 PE=4 SV=1             | CAVPO | 2  |
| 1923 | 4.45 | 4.5  | 15.58 | 8.846 | 5.769 | tr H0V9E0 H0V9E0_CAVPO | Uncharacterized protein OS=Cavia porcellus<br>GN=Ppil2 PE=4 SV=1             | CAVPO | 2  |
| 1924 | 4.44 | 4.62 | 13.91 | 10.6  | 3.863 | tr H0VNV1 H0VNV1_CAVPO | Uncharacterized protein OS=Cavia porcellus<br>GN=PRPF40A PE=4 SV=1           | CAVPO | 3  |
| 1925 | 4.43 | 4.49 | 4.3   | 1.906 | 1.197 | tr H0V463 H0V463_CAVPO | Uncharacterized protein OS=Cavia porcellus<br>GN=Dido1 PE=4 SV=1             | CAVPO | 2  |
| 1926 | 4.43 | 4.63 | 69.47 | 54.74 | 38.95 | tr H0VEJ0 H0VEJ0_CAVPO | Uncharacterized protein OS=Cavia porcellus<br>GN=Timm13 PE=4 SV=1            | CAVPO | 3  |
| 1927 | 4.43 | 4.48 | 17.32 | 14.57 | 8.268 | tr H0VG08 H0VG08_CAVPO | Uncharacterized protein (Fragment) OS=Cavia<br>porcellus GN=TMEM33 PE=4 SV=1 | CAVPO | 2  |
| 1928 | 4.42 | 4.74 | 9.387 | 5.887 | 2.625 | tr H0VN77 H0VN77_CAVPO | Uncharacterized protein OS=Cavia porcellus<br>GN=STAG1 PE=4 SV=1             | CAVPO | 3  |
| 1929 | 4.41 | 4.46 | 12.86 | 11.75 | 4.435 | tr H0VD93 H0VD93_CAVPO | Tubulin gamma chain OS=Cavia porcellus<br>GN=TUBG1 PE=3 SV=1                 | CAVPO | 2  |

|      |      |      |       |       |       |                        |                                                                                 |       |   |
|------|------|------|-------|-------|-------|------------------------|---------------------------------------------------------------------------------|-------|---|
| 1930 | 4.41 | 4.45 | 19.26 | 19.26 | 16.39 | tr H0VKN9 H0VKN9_CAVPO | Uncharacterized protein OS=Cavia porcellus<br>GN=TBCB PE=4 SV=1                 | CAVPO | 3 |
| 1931 | 4.41 | 4.45 | 13.77 | 13.77 | 10.93 | tr H0VL62 H0VL62_CAVPO | Uncharacterized protein OS=Cavia porcellus<br>GN=MLF2 PE=4 SV=1                 | CAVPO | 2 |
| 1932 | 4.4  | 9.84 | 19.24 | 14.74 | 10.35 | tr H0V966 H0V966_CAVPO | Uncharacterized protein (Fragment) OS=Cavia<br>porcellus GN=TNPO2 PE=4 SV=1     | CAVPO | 6 |
| 1933 | 4.39 | 4.99 | 32.44 | 23.08 | 13.71 | tr H0UYF1 H0UYF1_CAVPO | Uncharacterized protein (Fragment) OS=Cavia<br>porcellus GN=BPFL PE=4 SV=1      | CAVPO | 2 |
| 1934 | 4.39 | 4.53 | 14.01 | 10.75 | 5.95  | tr H0V3K6 H0V3K6_CAVPO | Importin subunit alpha OS=Cavia porcellus<br>GN=KPNA3 PE=3 SV=1                 | CAVPO | 4 |
| 1935 | 4.39 | 7.08 | 22.55 | 21.7  | 19.15 | tr H0V3W8 H0V3W8_CAVPO | Uncharacterized protein OS=Cavia porcellus<br>GN=TMED9 PE=3 SV=1                | CAVPO | 4 |
| 1936 | 4.39 | 4.53 | 38.73 | 38.73 | 14.79 | tr H0WAE0 H0WAE0_CAVPO | Uncharacterized protein (Fragment) OS=Cavia<br>porcellus GN=FAIM PE=4 SV=1      | CAVPO | 2 |
| 1937 | 4.38 | 4.71 | 36.59 | 25.99 | 5.198 | tr H0V8H2 H0V8H2_CAVPO | Uncharacterized protein OS=Cavia porcellus<br>GN=Ddx19a PE=4 SV=1               | CAVPO | 2 |
| 1938 | 4.38 | 4.59 | 34.12 | 21.18 | 21.18 | tr H0VGE1 H0VGE1_CAVPO | Uncharacterized protein OS=Cavia porcellus<br>GN=COX4I2 PE=4 SV=1               | CAVPO | 3 |
| 1939 | 4.38 | 4.76 | 15.32 | 10.99 | 7.387 | tr H0VS36 H0VS36_CAVPO | Uncharacterized protein (Fragment) OS=Cavia<br>porcellus GN=ASPSCR1 PE=4 SV=1   | CAVPO | 3 |
| 1940 | 4.38 | 4.49 | 11.6  | 11.6  | 11.6  | tr Q9TEH1 Q9TEH1_CAVPO | NADH-ubiquinone oxidoreductase chain 1<br>OS=Cavia porcellus GN=NADH1 PE=3 SV=1 | CAVPO | 4 |
| 1941 | 4.37 | 4.55 | 57.99 | 21.92 | 16.89 | tr H0VNE8 H0VNE8_CAVPO | Uncharacterized protein OS=Cavia porcellus<br>GN=TRAPPC4 PE=4 SV=1              | CAVPO | 3 |
| 1942 | 4.37 | 4.49 | 37.86 | 37.86 | 37.86 | tr H0VVE0 H0VVE0_CAVPO | Uncharacterized protein OS=Cavia porcellus<br>GN=Ndufa11 PE=4 SV=1              | CAVPO | 3 |
| 1943 | 4.36 | 5.68 | 23.52 | 12.02 | 6.969 | tr H0VM19 H0VM19_CAVPO | Uncharacterized protein (Fragment) OS=Cavia<br>porcellus GN=SEPT9 PE=3 SV=1     | CAVPO | 5 |

|      |      |      |       |       |       |                        |                                                                              |       |   |
|------|------|------|-------|-------|-------|------------------------|------------------------------------------------------------------------------|-------|---|
| 1944 | 4.35 | 4.63 | 24.34 | 20.58 | 10.84 | tr H0UXX3 H0UXX3_CAVPO | Uncharacterized protein OS=Cavia porcellus<br>GN=EIF2B3 PE=4 SV=1            | CAVPO | 3 |
| 1945 | 4.35 | 5.85 | 16.67 | 9.005 | 6.317 | tr H0VBS7 H0VBS7_CAVPO | Uncharacterized protein OS=Cavia porcellus<br>GN=DCLK2 PE=4 SV=1             | CAVPO | 3 |
| 1946 | 4.35 | 4.52 | 5.605 | 4.557 | 1.152 | tr H0VGS4 H0VGS4_CAVPO | Uncharacterized protein (Fragment) OS=Cavia<br>porcellus GN=ARID1A PE=4 SV=1 | CAVPO | 2 |
| 1947 | 4.34 | 4.48 | 17.65 | 17.65 | 8.497 | tr H0VCQ2 H0VCQ2_CAVPO | Uncharacterized protein OS=Cavia porcellus<br>GN=SAP18 PE=4 SV=1             | CAVPO | 2 |
| 1948 | 4.34 | 8.52 | 27.42 | 21.37 | 18.15 | tr H0VP72 H0VP72_CAVPO | Uncharacterized protein OS=Cavia porcellus<br>GN=TPM4 PE=3 SV=1              | CAVPO | 5 |
| 1949 | 4.33 | 4.36 | 61.63 | 39.53 | 39.53 | tr H0V1Y7 H0V1Y7_CAVPO | Uncharacterized protein OS=Cavia porcellus<br>GN=Bola2b PE=3 SV=1            | CAVPO | 3 |
| 1950 | 4.33 | 4.4  | 19.16 | 13.36 | 4.745 | tr H0V5R8 H0V5R8_CAVPO | Uncharacterized protein (Fragment) OS=Cavia<br>porcellus GN=STAU1 PE=4 SV=1  | CAVPO | 2 |
| 1951 | 4.33 | 4.41 | 16.72 | 13.78 | 8.211 | tr H0V7D4 H0V7D4_CAVPO | Uncharacterized protein OS=Cavia porcellus<br>GN=ARFIP2 PE=4 SV=1            | CAVPO | 2 |
| 1952 | 4.33 | 4.49 | 26.07 | 24.07 | 17.19 | tr H0W6G0 H0W6G0_CAVPO | Uncharacterized protein OS=Cavia porcellus<br>GN=SYAP1 PE=4 SV=1             | CAVPO | 4 |
| 1953 | 4.32 | 4.42 | 18.07 | 18.07 | 10.84 | tr H0V1L6 H0V1L6_CAVPO | 40S ribosomal protein S6 OS=Cavia porcellus<br>GN=Rps6 PE=3 SV=1             | CAVPO | 2 |
| 1954 | 4.32 | 4.45 | 17.2  | 17.2  | 17.2  | tr H0VHR8 H0VHR8_CAVPO | Uncharacterized protein OS=Cavia porcellus<br>GN=NUP43 PE=4 SV=1             | CAVPO | 4 |
| 1955 | 4.32 | 4.4  | 58.43 | 41.57 | 41.57 | tr H0W3G1 H0W3G1_CAVPO | Uncharacterized protein OS=Cavia porcellus<br>GN=TIMM9 PE=4 SV=1             | CAVPO | 3 |
| 1956 | 4.31 | 4.42 | 9.25  | 6.283 | 6.283 | tr H0VWM2 H0VWM2_CAVPO | Uncharacterized protein (Fragment) OS=Cavia<br>porcellus GN=TTC39C PE=4 SV=1 | CAVPO | 3 |
| 1957 | 4.29 | 4.44 | 13.49 | 11.11 | 8.532 | tr H0VAT2 H0VAT2_CAVPO | Uncharacterized protein OS=Cavia porcellus<br>GN=EIF2B4 PE=3 SV=1            | CAVPO | 3 |

|      |      |      |       |       |       |                        |                                                                            |       |   |
|------|------|------|-------|-------|-------|------------------------|----------------------------------------------------------------------------|-------|---|
| 1958 | 4.29 | 4.6  | 20.83 | 13.1  | 10.91 | tr H0VMD1 H0VMD1_CAVPO | Serine hydroxymethyltransferase OS=Cavia porcellus GN=SHMT2 PE=1 SV=1      | CAVPO | 4 |
| 1959 | 4.29 | 4.43 | 36.36 | 36.36 | 36.36 | tr H0VPK7 H0VPK7_CAVPO | Uncharacterized protein OS=Cavia porcellus GN=MAP1LC3A PE=3 SV=1           | CAVPO | 4 |
| 1960 | 4.28 | 4.58 | 7.95  | 4.184 | 2.762 | tr H0UUH9 H0UUH9_CAVPO | Uncharacterized protein OS=Cavia porcellus GN=DHX30 PE=4 SV=1              | CAVPO | 3 |
| 1961 | 4.28 | 4.42 | 8.147 | 6.439 | 4.862 | tr H0VFA5 H0VFA5_CAVPO | Uncharacterized protein (Fragment) OS=Cavia porcellus GN=PPP1R21 PE=4 SV=1 | CAVPO | 4 |
| 1962 | 4.28 | 4.3  | 31.71 | 26.83 | 16.59 | tr H0W0F1 H0W0F1_CAVPO | Uncharacterized protein OS=Cavia porcellus GN=Ppp1r2 PE=4 SV=1             | CAVPO | 2 |
| 1963 | 4.27 | 4.45 | 22.51 | 17.63 | 10.67 | tr H0V4C4 H0V4C4_CAVPO | Uncharacterized protein OS=Cavia porcellus GN=CSTF1 PE=4 SV=1              | CAVPO | 3 |
| 1964 | 4.27 | 4.3  | 20.31 | 19.79 | 15.63 | tr H0VKA8 H0VKA8_CAVPO | Uncharacterized protein OS=Cavia porcellus GN=SEC11C PE=4 SV=1             | CAVPO | 2 |
| 1965 | 4.26 | 4.37 | 15.14 | 15.14 | 15.14 | tr H0W4C8 H0W4C8_CAVPO | Uncharacterized protein OS=Cavia porcellus GN=ICMT PE=4 SV=1               | CAVPO | 3 |
| 1966 | 4.25 | 4.28 | 9.896 | 4.028 | 2.877 | tr H0V892 H0V892_CAVPO | Uncharacterized protein OS=Cavia porcellus GN=GTF3C3 PE=4 SV=1             | CAVPO | 2 |
| 1967 | 4.24 | 4.43 | 39.13 | 29.95 | 19.81 | tr H0UYC6 H0UYC6_CAVPO | Uncharacterized protein OS=Cavia porcellus GN=SPRYD4 PE=4 SV=1             | CAVPO | 3 |
| 1968 | 4.23 | 4.25 | 17.66 | 9.24  | 9.24  | tr H0VMB1 H0VMB1_CAVPO | Uncharacterized protein (Fragment) OS=Cavia porcellus GN=CTSA PE=4 SV=1    | CAVPO | 4 |
| 1969 | 4.23 | 4.26 | 37.56 | 37.56 | 22.44 | tr H0VN29 H0VN29_CAVPO | Uncharacterized protein (Fragment) OS=Cavia porcellus GN=TPD52L1 PE=4 SV=1 | CAVPO | 3 |
| 1970 | 4.22 | 4.53 | 22.86 | 12.76 | 6.286 | tr H0UWQ5 H0UWQ5_CAVPO | Uncharacterized protein (Fragment) OS=Cavia porcellus GN=MPP7 PE=4 SV=1    | CAVPO | 3 |
| 1971 | 4.21 | 4.23 | 30.11 | 22.16 | 17.05 | tr H0VHX6 H0VHX6_CAVPO | Uncharacterized protein OS=Cavia porcellus GN=TPPP3 PE=4 SV=1              | CAVPO | 2 |

|      |      |      |       |       |       |                        |                                                                                                  |       |    |
|------|------|------|-------|-------|-------|------------------------|--------------------------------------------------------------------------------------------------|-------|----|
| 1972 | 4.21 | 35.6 | 62.22 | 55.66 | 53.85 | tr H0VXL5 H0VXL5_CAVPO | Uncharacterized protein OS=Cavia porcellus<br>PE=4 SV=1                                          | CAVPO | 67 |
| 1973 | 4.2  | 18.7 | 44.65 | 44.34 | 38.53 | tr H0VAY6 H0VAY6_CAVPO | Serine/threonine-protein phosphatase<br>OS=Cavia porcellus GN=PPP1CB PE=3 SV=1                   | CAVPO | 10 |
| 1974 | 4.18 | 4.35 | 15.14 | 11.78 | 6.49  | tr H0VHE3 H0VHE3_CAVPO | Phosphatidate cytidyltransferase (Fragment)<br>OS=Cavia porcellus GN=CDS1 PE=3 SV=1              | CAVPO | 2  |
| 1975 | 4.18 | 4.2  | 38    | 37    | 37    | tr H0VL18 H0VL18_CAVPO | SH3 domain-binding glutamic acid-rich-like<br>protein OS=Cavia porcellus GN=SH3BGRL<br>PE=3 SV=1 | CAVPO | 3  |
| 1976 | 4.16 | 4.26 | 17.7  | 12.03 | 6.529 | tr H0UWM0 H0UWM0_CAVPO | Uncharacterized protein (Fragment) OS=Cavia<br>porcellus GN=PDE12 PE=4 SV=1                      | CAVPO | 2  |
| 1977 | 4.16 | 4.22 | 35.75 | 31.09 | 19.69 | tr H0W5F0 H0W5F0_CAVPO | Uncharacterized protein (Fragment) OS=Cavia<br>porcellus GN=Bid PE=4 SV=1                        | CAVPO | 2  |
| 1978 | 4.15 | 4.32 | 18.91 | 14.9  | 14.9  | tr H0V0U3 H0V0U3_CAVPO | Methionine aminopeptidase (Fragment)<br>OS=Cavia porcellus GN=METAP1 PE=3 SV=1                   | CAVPO | 3  |
| 1979 | 4.15 | 4.33 | 6.327 | 6.327 | 6.327 | tr H0VEW5 H0VEW5_CAVPO | Uncharacterized protein OS=Cavia porcellus<br>GN=PLD3 PE=4 SV=1                                  | CAVPO | 3  |
| 1980 | 4.14 | 4.16 | 29.12 | 15.33 | 11.88 | tr H0V401 H0V401_CAVPO | Uncharacterized protein OS=Cavia porcellus<br>GN=EMC3 PE=4 SV=1                                  | CAVPO | 2  |
| 1981 | 4.14 | 4.29 | 27.06 | 23.43 | 10.89 | tr H0VI83 H0VI83_CAVPO | Uncharacterized protein (Fragment) OS=Cavia<br>porcellus GN=PSMD8 PE=4 SV=1                      | CAVPO | 3  |
| 1982 | 4.13 | 8.21 | 18.72 | 15.27 | 13.05 | tr H0VC01 H0VC01_CAVPO | Uncharacterized protein OS=Cavia porcellus<br>GN=PDK3 PE=4 SV=1                                  | CAVPO | 4  |
| 1983 | 4.13 | 4.24 | 16.76 | 14.8  | 11.73 | tr H0VX00 H0VX00_CAVPO | Uncharacterized protein OS=Cavia porcellus<br>GN=HSPBP1 PE=4 SV=1                                | CAVPO | 3  |
| 1984 | 4.12 | 9.06 | 21.03 | 16.33 | 16.33 | tr H0VBU1 H0VBU1_CAVPO | Uncharacterized protein (Fragment) OS=Cavia<br>porcellus GN=Syn2 PE=4 SV=1                       | CAVPO | 6  |
| 1985 | 4.12 | 4.23 | 21.29 | 15.07 | 11.48 | tr H0VEC6 H0VEC6_CAVPO | Uncharacterized protein (Fragment) OS=Cavia                                                      | CAVPO | 3  |



|      |      |      |       |       |       |                        |                                                                              |       |    |
|------|------|------|-------|-------|-------|------------------------|------------------------------------------------------------------------------|-------|----|
|      |      |      |       |       |       |                        | porcellus GN=FAF2 PE=4 SV=1                                                  |       |    |
| 1986 | 4.12 | 4.48 | 18.09 | 16.58 | 11.56 | tr H0VQI8 H0VQI8_CAVPO | Uncharacterized protein OS=Cavia porcellus<br>GN=SSSCA1 PE=4 SV=1            | CAVPO | 2  |
| 1987 | 4.12 | 4.26 | 19.46 | 19.46 | 9.728 | tr H0W286 H0W286_CAVPO | Uncharacterized protein OS=Cavia porcellus<br>GN=ADO PE=4 SV=1               | CAVPO | 3  |
| 1988 | 4.12 | 4.14 | 21    | 21    | 16.5  | tr H0W9V3 H0W9V3_CAVPO | Uncharacterized protein OS=Cavia porcellus<br>GN=LOC100721711 PE=4 SV=1      | CAVPO | 2  |
| 1989 | 4.11 | 4.26 | 45.07 | 40.14 | 32.39 | tr H0V6Q6 H0V6Q6_CAVPO | Uncharacterized protein OS=Cavia porcellus<br>GN=TOMM22 PE=4 SV=1            | CAVPO | 3  |
| 1990 | 4.1  | 4.11 | 9.548 | 6.03  | 4.355 | tr H0UWR2 H0UWR2_CAVPO | Uncharacterized protein OS=Cavia porcellus<br>GN=MBD1 PE=4 SV=1              | CAVPO | 2  |
| 1991 | 4.1  | 8.11 | 24.53 | 16.23 | 12.45 | tr H0V6P5 H0V6P5_CAVPO | Uncharacterized protein OS=Cavia porcellus<br>GN=SRSF5 PE=4 SV=1             | CAVPO | 4  |
| 1992 | 4.1  | 12.5 | 49.03 | 43.24 | 27.8  | tr H0VQ88 H0VQ88_CAVPO | Uncharacterized protein OS=Cavia porcellus<br>GN=LUC7L PE=4 SV=1             | CAVPO | 6  |
| 1993 | 4.1  | 4.11 | 29.61 | 23.46 | 13.97 | tr H0VZ14 H0VZ14_CAVPO | Uncharacterized protein OS=Cavia porcellus<br>GN=ZNF428 PE=4 SV=1            | CAVPO | 2  |
| 1994 | 4.1  | 4.23 | 11.77 | 6.339 | 2.199 | tr H0W578 H0W578_CAVPO | Uncharacterized protein OS=Cavia porcellus<br>GN=CHAMP1 PE=4 SV=1            | CAVPO | 2  |
| 1995 | 4.1  | 8.11 | 44.06 | 43.36 | 43.36 | tr H0W5I5 H0W5I5_CAVPO | Histone H2A OS=Cavia porcellus GN=H2AFX<br>PE=3 SV=1                         | CAVPO | 13 |
| 1996 | 4.09 | 4.1  | 39.78 | 39.78 | 39.78 | tr H0UUI3 H0UUI3_CAVPO | Uncharacterized protein OS=Cavia porcellus<br>GN=HIGD1A PE=4 SV=1            | CAVPO | 3  |
| 1997 | 4.09 | 4.1  | 9.717 | 9.717 | 9.717 | tr H0UWW1 H0UWW1_CAVPO | Uncharacterized protein (Fragment) OS=Cavia<br>porcellus GN=ZNF207 PE=4 SV=1 | CAVPO | 4  |
| 1998 | 4.09 | 4.1  | 10.24 | 5.903 | 3.472 | tr H0VKP4 H0VKP4_CAVPO | Uncharacterized protein OS=Cavia porcellus<br>GN=CDKN2AIP PE=4 SV=1          | CAVPO | 2  |

|      |      |      |       |       |       |                        |                                                                              |       |   |
|------|------|------|-------|-------|-------|------------------------|------------------------------------------------------------------------------|-------|---|
| 1999 | 4.09 | 5.56 | 35.93 | 23.38 | 20.78 | tr H0VPX6 H0VPX6_CAVPO | Uncharacterized protein OS=Cavia porcellus<br>GN=Dnajb6 PE=4 SV=1            | CAVPO | 4 |
| 2000 | 4.08 | 4.11 | 9.128 | 4.966 | 3.087 | tr H0UWU1 H0UWU1_CAVPO | Uncharacterized protein OS=Cavia porcellus<br>GN=CUL2 PE=3 SV=1              | CAVPO | 2 |
| 2001 | 4.08 | 4.19 | 32.31 | 20    | 12.31 | tr H0UY31 H0UY31_CAVPO | Uncharacterized protein OS=Cavia porcellus<br>GN=Ssu72 PE=4 SV=1             | CAVPO | 3 |
| 2002 | 4.08 | 4.25 | 10.03 | 8.883 | 3.868 | tr H0UYP4 H0UYP4_CAVPO | Uncharacterized protein (Fragment) OS=Cavia<br>porcellus GN=SEC63 PE=4 SV=1  | CAVPO | 2 |
| 2003 | 4.08 | 4.1  | 14.35 | 9.647 | 6.353 | tr H0VTA3 H0VTA3_CAVPO | Alpha-tubulin N-acetyltransferase 1 OS=Cavia<br>porcellus GN=ATAT1 PE=1 SV=1 | CAVPO | 2 |
| 2004 | 4.07 | 4.09 | 9.766 | 7.856 | 5.52  | tr H0V0Q2 H0V0Q2_CAVPO | Uncharacterized protein OS=Cavia porcellus<br>GN=THUMPD2 PE=4 SV=1           | CAVPO | 2 |
| 2005 | 4.07 | 4.08 | 38.46 | 38.46 | 38.46 | tr H0VA13 H0VA13_CAVPO | Uncharacterized protein (Fragment) OS=Cavia<br>porcellus GN=COX7A2 PE=4 SV=1 | CAVPO | 3 |
| 2006 | 4.07 | 6.13 | 21.81 | 18.1  | 14.15 | tr H0VJJ8 H0VJJ8_CAVPO | Uncharacterized protein OS=Cavia porcellus<br>GN=TMPO PE=4 SV=1              | CAVPO | 6 |
| 2007 | 4.07 | 4.22 | 16.22 | 16.22 | 16.22 | tr H0VMU1 H0VMU1_CAVPO | Uncharacterized protein OS=Cavia porcellus<br>GN=SRM PE=3 SV=1               | CAVPO | 4 |
| 2008 | 4.07 | 4.08 | 56.52 | 56.52 | 56.52 | tr H0VWA0 H0VWA0_CAVPO | Uncharacterized protein OS=Cavia porcellus<br>GN=S100B PE=4 SV=1             | CAVPO | 3 |
| 2009 | 4.07 | 4.2  | 11.62 | 5.755 | 4.886 | tr H0W2T3 H0W2T3_CAVPO | Uncharacterized protein (Fragment) OS=Cavia<br>porcellus GN=WDR17 PE=4 SV=1  | CAVPO | 3 |
| 2010 | 4.05 | 4.16 | 7.204 | 4.086 | 2.151 | tr H0V2P2 H0V2P2_CAVPO | Uncharacterized protein OS=Cavia porcellus<br>GN=CC2D1A PE=4 SV=1            | CAVPO | 2 |
| 2011 | 4.05 | 4.15 | 19.53 | 11.66 | 8.455 | tr H0V6Q2 H0V6Q2_CAVPO | Uncharacterized protein (Fragment) OS=Cavia<br>porcellus GN=PBX1 PE=3 SV=1   | CAVPO | 2 |
| 2012 | 4.05 | 12.1 | 28.61 | 20.06 | 17.99 | tr H0VJX8 H0VJX8_CAVPO | Uncharacterized protein OS=Cavia porcellus<br>GN=SRSF6 PE=4 SV=1             | CAVPO | 7 |

|      |      |      |       |       |       |                        |                                                                                       |       |   |
|------|------|------|-------|-------|-------|------------------------|---------------------------------------------------------------------------------------|-------|---|
| 2013 | 4.05 | 4.37 | 77.94 | 69.12 | 44.12 | tr H0WE10 H0WE10_CAVPO | Guanine nucleotide-binding protein subunit gamma OS=Cavia porcellus GN=GNG7 PE=3 SV=1 | CAVPO | 2 |
| 2014 | 4.04 | 4.09 | 9.556 | 5.249 | 3.903 | tr H0V1E7 H0V1E7_CAVPO | Uncharacterized protein OS=Cavia porcellus GN=NUP88 PE=4 SV=1                         | CAVPO | 2 |
| 2015 | 4.04 | 4.16 | 54.11 | 43.84 | 43.84 | tr H0VQJ8 H0VQJ8_CAVPO | Uncharacterized protein OS=Cavia porcellus GN=CYP5B PE=3 SV=1                         | CAVPO | 3 |
| 2016 | 4.03 | 4.03 | 10.18 | 4.909 | 4.909 | tr H0V144 H0V144_CAVPO | Uncharacterized protein (Fragment) OS=Cavia porcellus GN=PDPK1 PE=4 SV=1              | CAVPO | 2 |
| 2017 | 4.03 | 4.04 | 19.17 | 10.36 | 10.36 | tr H0VCC1 H0VCC1_CAVPO | Uncharacterized protein OS=Cavia porcellus GN=C16orf80 PE=4 SV=1                      | CAVPO | 2 |
| 2018 | 4.03 | 11.4 | 45.12 | 41.46 | 30.49 | tr H0WDH3 H0WDH3_CAVPO | Uncharacterized protein OS=Cavia porcellus GN=LOC100715281 PE=4 SV=1                  | CAVPO | 7 |
| 2019 | 4.02 | 6.22 | 18.26 | 9.211 | 7.895 | tr H0V1J5 H0V1J5_CAVPO | Uncharacterized protein (Fragment) OS=Cavia porcellus GN=FMR1 PE=4 SV=1               | CAVPO | 4 |
| 2020 | 4.02 | 8.03 | 10.72 | 7.32  | 7.32  | tr H0V406 H0V406_CAVPO | Reticulon OS=Cavia porcellus GN=RTN3 PE=4 SV=1                                        | CAVPO | 5 |
| 2021 | 4.02 | 4.18 | 13.72 | 6.342 | 3.54  | tr H0V4Q0 H0V4Q0_CAVPO | Uncharacterized protein OS=Cavia porcellus GN=TAF6 PE=4 SV=1                          | CAVPO | 2 |
| 2022 | 4.02 | 4.03 | 33.57 | 26.43 | 16.43 | tr H0VFW4 H0VFW4_CAVPO | Uncharacterized protein OS=Cavia porcellus GN=RPL23 PE=3 SV=1                         | CAVPO | 2 |
| 2023 | 4.02 | 4.02 | 13.16 | 7.895 | 7.895 | tr H0VVG1 H0VVG1_CAVPO | Uncharacterized protein OS=Cavia porcellus GN=ZNF787 PE=4 SV=1                        | CAVPO | 2 |
| 2024 | 4.02 | 8.74 | 21.71 | 16.57 | 14.57 | tr H0W958 H0W958_CAVPO | Uncharacterized protein (Fragment) OS=Cavia porcellus GN=SH3GL1 PE=4 SV=1             | CAVPO | 6 |
| 2025 | 4.01 | 4.01 | 28.23 | 16.75 | 16.75 | tr H0UYI6 H0UYI6_CAVPO | D-tyrosyl-tRNA(Tyr) deacylase OS=Cavia porcellus GN=DTD1 PE=3 SV=1                    | CAVPO | 2 |
| 2026 | 4.01 | 4.01 | 23.03 | 19.66 | 19.66 | tr H0VCC7 H0VCC7_CAVPO | Uncharacterized protein (Fragment) OS=Cavia                                           | CAVPO | 4 |

|      |      |      |       |       |       |                        |                                                                             |       |    |
|------|------|------|-------|-------|-------|------------------------|-----------------------------------------------------------------------------|-------|----|
|      |      |      |       |       |       |                        | porcellus GN=RPL11 PE=3 SV=1                                                |       |    |
| 2027 | 4.01 | 6.71 | 22.76 | 16.21 | 16.21 | tr H0VHW0 H0VHW0_CAVPO | Uncharacterized protein (Fragment) OS=Cavia porcellus GN=OPCML PE=4 SV=1    | CAVPO | 4  |
| 2028 | 4.01 | 4.02 | 16.11 | 6.389 | 6.389 | tr H0VRJ9 H0VRJ9_CAVPO | Uncharacterized protein OS=Cavia porcellus GN=MRPS22 PE=4 SV=1              | CAVPO | 2  |
| 2029 | 4.01 | 14.8 | 41.78 | 38.54 | 33.69 | tr H0VZ49 H0VZ49_CAVPO | Uncharacterized protein (Fragment) OS=Cavia porcellus GN=GNB2 PE=4 SV=1     | CAVPO | 22 |
| 2030 | 4.01 | 4.03 | 43.27 | 37.5  | 37.5  | tr H0W053 H0W053_CAVPO | Uncharacterized protein (Fragment) OS=Cavia porcellus GN=ERH PE=4 SV=1      | CAVPO | 4  |
| 2031 | 4.01 | 4.02 | 21.51 | 11.83 | 11.83 | tr H0WC92 H0WC92_CAVPO | Uncharacterized protein OS=Cavia porcellus GN=H1FX PE=3 SV=1                | CAVPO | 2  |
| 2032 | 4    | 10.6 | 41.8  | 41.27 | 41.27 | tr H0UT66 H0UT66_CAVPO | Uncharacterized protein OS=Cavia porcellus GN=HRAS PE=4 SV=1                | CAVPO | 7  |
| 2033 | 4    | 4    | 4.662 | 4.662 | 4.662 | tr H0V1X0 H0V1X0_CAVPO | Uncharacterized protein (Fragment) OS=Cavia porcellus GN=SLC35B2 PE=4 SV=1  | CAVPO | 2  |
| 2034 | 4    | 4    | 51.75 | 51.75 | 51.75 | tr H0V2W3 H0V2W3_CAVPO | Uncharacterized protein OS=Cavia porcellus GN=Rplp1 PE=3 SV=1               | CAVPO | 4  |
| 2035 | 4    | 4    | 18.1  | 17.24 | 17.24 | tr H0V3Q3 H0V3Q3_CAVPO | Uncharacterized protein (Fragment) OS=Cavia porcellus GN=VKORC1L1 PE=4 SV=1 | CAVPO | 2  |
| 2036 | 4    | 4    | 16.13 | 16.13 | 16.13 | tr H0V5L0 H0V5L0_CAVPO | Uncharacterized protein OS=Cavia porcellus GN=KIAA1143 PE=4 SV=1            | CAVPO | 2  |
| 2037 | 4    | 6.44 | 12.03 | 12.03 | 12.03 | tr H0V6Y9 H0V6Y9_CAVPO | Uncharacterized protein OS=Cavia porcellus PE=4 SV=1                        | CAVPO | 4  |
| 2038 | 4    | 4.11 | 25.67 | 12.64 | 9.579 | tr H0VAE6 H0VAE6_CAVPO | Uncharacterized protein OS=Cavia porcellus GN=PCSK1N PE=4 SV=1              | CAVPO | 2  |
| 2039 | 4    | 4    | 21.46 | 21.46 | 21.46 | tr H0VAU1 H0VAU1_CAVPO | Uncharacterized protein (Fragment) OS=Cavia porcellus GN=MARCKSL1 PE=4 SV=1 | CAVPO | 4  |

|      |   |      |       |       |       |                        |                                                                          |       |    |
|------|---|------|-------|-------|-------|------------------------|--------------------------------------------------------------------------|-------|----|
| 2040 | 4 | 4    | 24.07 | 24.07 | 18.52 | tr H0VCM4 H0VCM4_CAVPO | Uncharacterized protein (Fragment) OS=Cavia porcellus GN=SNRPC PE=3 SV=1 | CAVPO | 2  |
| 2041 | 4 | 4.02 | 31.32 | 21.43 | 21.43 | tr H0VF55 H0VF55_CAVPO | Uncharacterized protein OS=Cavia porcellus GN=C11orf58 PE=4 SV=1         | CAVPO | 4  |
| 2042 | 4 | 27.5 | 35.09 | 30.76 | 29.13 | tr H0VG24 H0VG24_CAVPO | Uncharacterized protein OS=Cavia porcellus GN=Hsd17b4 PE=3 SV=1          | CAVPO | 14 |
| 2043 | 4 | 4    | 17.28 | 17.28 | 17.28 | tr H0VI16 H0VI16_CAVPO | Uncharacterized protein (Fragment) OS=Cavia porcellus GN=NEDD8 PE=4 SV=1 | CAVPO | 2  |
| 2044 | 4 | 4.02 | 19.41 | 15.29 | 15.29 | tr H0VIW2 H0VIW2_CAVPO | Uncharacterized protein OS=Cavia porcellus GN=SAT2 PE=4 SV=1             | CAVPO | 3  |
| 2045 | 4 | 6.01 | 33.16 | 28.06 | 20.41 | tr H0VJ69 H0VJ69_CAVPO | Uncharacterized protein OS=Cavia porcellus GN=RALA PE=4 SV=1             | CAVPO | 3  |
| 2046 | 4 | 19.7 | 47.54 | 42.32 | 39.71 | tr H0VN63 H0VN63_CAVPO | Uncharacterized protein OS=Cavia porcellus GN=RBM4 PE=4 SV=1             | CAVPO | 11 |
| 2047 | 4 | 4    | 24.79 | 24.79 | 24.79 | tr H0VS59 H0VS59_CAVPO | Uncharacterized protein (Fragment) OS=Cavia porcellus GN=FHIT PE=4 SV=1  | CAVPO | 2  |
| 2048 | 4 | 6    | 5.323 | 5.323 | 5.323 | tr H0VS95 H0VS95_CAVPO | Transporter OS=Cavia porcellus GN=SLC6A6 PE=3 SV=1                       | CAVPO | 3  |
| 2049 | 4 | 4    | 20    | 11.43 | 11.43 | tr H0VVN6 H0VVN6_CAVPO | Uncharacterized protein OS=Cavia porcellus GN=CIRBP PE=4 SV=1            | CAVPO | 3  |
| 2050 | 4 | 4    | 32.89 | 15.79 | 15.79 | tr H0W5R7 H0W5R7_CAVPO | Uncharacterized protein OS=Cavia porcellus GN=FIS1 PE=4 SV=1             | CAVPO | 2  |
| 2051 | 4 | 4.01 | 33.7  | 25    | 25    | tr H0W8S9 H0W8S9_CAVPO | Uncharacterized protein OS=Cavia porcellus GN=LOC100721790 PE=4 SV=1     | CAVPO | 2  |
| 2052 | 4 | 4    | 13.69 | 13.69 | 13.69 | tr H0WAJ1 H0WAJ1_CAVPO | Uncharacterized protein OS=Cavia porcellus GN=PTP4A2 PE=4 SV=1           | CAVPO | 2  |
| 2053 | 4 | 15.9 | 74.6  | 69.05 | 60.32 | tr H0WBT4 H0WBT4_CAVPO | Histone H2B OS=Cavia porcellus GN=HIST1H2BB PE=3 SV=1                    | CAVPO | 31 |

|      |      |      |       |       |       |                        |                                                                                 |       |    |
|------|------|------|-------|-------|-------|------------------------|---------------------------------------------------------------------------------|-------|----|
| 2054 | 4    | 4.08 | 6.043 | 6.043 | 6.043 | tr Q9TEG9 Q9TEG9_CAVPO | Cytochrome c oxidase subunit 1 OS=Cavia porcellus GN=COI PE=3 SV=1              | CAVPO | 3  |
| 2055 | 3.99 | 4.12 | 13.28 | 13.28 | 11.11 | tr H0WAC5 H0WAC5_CAVPO | Uncharacterized protein (Fragment) OS=Cavia porcellus GN=LOC100721198 PE=4 SV=1 | CAVPO | 3  |
| 2056 | 3.98 | 4.21 | 14.85 | 7.723 | 7.723 | tr H0V9S3 H0V9S3_CAVPO | Uncharacterized protein OS=Cavia porcellus GN=FAM114A2 PE=4 SV=1                | CAVPO | 3  |
| 2057 | 3.98 | 4.21 | 19.34 | 14.63 | 8.711 | tr H0VGL9 H0VGL9_CAVPO | Uncharacterized protein OS=Cavia porcellus GN=FUBP3 PE=4 SV=1                   | CAVPO | 3  |
| 2058 | 3.97 | 4.09 | 34.3  | 34.3  | 16.86 | tr H0V2B1 H0V2B1_CAVPO | Uncharacterized protein OS=Cavia porcellus GN=LOC100718753 PE=4 SV=1            | CAVPO | 2  |
| 2059 | 3.97 | 4.08 | 26.55 | 10.73 | 7.627 | tr H0VC30 H0VC30_CAVPO | Uncharacterized protein (Fragment) OS=Cavia porcellus GN=VPS36 PE=4 SV=1        | CAVPO | 2  |
| 2060 | 3.97 | 4.05 | 37.5  | 37.5  | 37.5  | tr H0VS34 H0VS34_CAVPO | Uncharacterized protein (Fragment) OS=Cavia porcellus GN=SEC61B PE=4 SV=1       | CAVPO | 3  |
| 2061 | 3.97 | 4.08 | 17.05 | 16.48 | 12.5  | tr H0VST8 H0VST8_CAVPO | 60S ribosomal protein L18a OS=Cavia porcellus GN=Rpl18a PE=3 SV=1               | CAVPO | 2  |
| 2062 | 3.96 | 4.06 | 16.4  | 8.907 | 4.453 | tr H0V3E1 H0V3E1_CAVPO | UDP-glucose 6-dehydrogenase OS=Cavia porcellus GN=UGDH PE=3 SV=1                | CAVPO | 2  |
| 2063 | 3.96 | 4.21 | 16.69 | 9.7   | 6.99  | tr H0VIR4 H0VIR4_CAVPO | Uncharacterized protein (Fragment) OS=Cavia porcellus GN=KIF3A PE=4 SV=1        | CAVPO | 4  |
| 2064 | 3.96 | 4.13 | 12.98 | 6.711 | 4.73  | tr H0W3R1 H0W3R1_CAVPO | Uncharacterized protein (Fragment) OS=Cavia porcellus GN=DNMT3A PE=4 SV=1       | CAVPO | 3  |
| 2065 | 3.95 | 4.03 | 9.742 | 9.742 | 7.736 | tr H0V0H6 H0V0H6_CAVPO | Uncharacterized protein (Fragment) OS=Cavia porcellus GN=PTER PE=4 SV=1         | CAVPO | 2  |
| 2066 | 3.95 | 27.8 | 54.64 | 48.28 | 46.95 | tr H0VGS3 H0VGS3_CAVPO | Uncharacterized protein OS=Cavia porcellus GN=ACTA1 PE=3 SV=1                   | CAVPO | 39 |
| 2067 | 3.95 | 4.04 | 17.99 | 5.913 | 5.913 | tr H0W3Y1 H0W3Y1_CAVPO | Uncharacterized protein (Fragment) OS=Cavia porcellus GN=MTCH1 PE=3 SV=1        | CAVPO | 2  |

|      |      |      |       |       |       |                        |                                                                                               |       |   |
|------|------|------|-------|-------|-------|------------------------|-----------------------------------------------------------------------------------------------|-------|---|
| 2068 | 3.94 | 4.04 | 16.28 | 7.849 | 6.105 | tr H0VNF2 H0VNF2_CAVPO | Uncharacterized protein OS=Cavia porcellus<br>GN=NAGK PE=4 SV=1                               | CAVPO | 2 |
| 2069 | 3.93 | 4.01 | 33.81 | 33.81 | 26.62 | tr H0V206 H0V206_CAVPO | Uncharacterized protein (Fragment) OS=Cavia<br>porcellus GN=NUDT3 PE=3 SV=1                   | CAVPO | 2 |
| 2070 | 3.93 | 4.21 | 19.48 | 13.75 | 13.75 | tr H0V576 H0V576_CAVPO | Uncharacterized protein (Fragment) OS=Cavia<br>porcellus GN=LRPAP1 PE=4 SV=1                  | CAVPO | 4 |
| 2071 | 3.93 | 4.15 | 11.07 | 7.946 | 2.198 | tr H0VKE1 H0VKE1_CAVPO | Uncharacterized protein (Fragment) OS=Cavia<br>porcellus GN=EIF5B PE=4 SV=1                   | CAVPO | 2 |
| 2072 | 3.92 | 4.02 | 14.78 | 14.78 | 10.48 | tr H0VAI6 H0VAI6_CAVPO | Uncharacterized protein OS=Cavia porcellus<br>GN=HEPACAM PE=4 SV=1                            | CAVPO | 2 |
| 2073 | 3.92 | 4.11 | 15.45 | 8.485 | 5.758 | tr H0VF49 H0VF49_CAVPO | Uncharacterized protein OS=Cavia porcellus<br>GN=LEO1 PE=4 SV=1                               | CAVPO | 4 |
| 2074 | 3.92 | 4    | 19.47 | 19.47 | 19.47 | tr H0W2L5 H0W2L5_CAVPO | Uncharacterized protein OS=Cavia porcellus<br>GN=PDDC1 PE=4 SV=1                              | CAVPO | 2 |
| 2075 | 3.92 | 4.05 | 8.715 | 8.715 | 8.715 | tr Q9TEG2 Q9TEG2_CAVPO | NADH-ubiquinone oxidoreductase chain 4<br>(Fragment) OS=Cavia porcellus GN=NADH4<br>PE=3 SV=1 | CAVPO | 4 |
| 2076 | 3.91 | 4.18 | 10.49 | 8.663 | 4.103 | tr H0UXQ6 H0UXQ6_CAVPO | Uncharacterized protein OS=Cavia porcellus<br>GN=ABCD3 PE=3 SV=1                              | CAVPO | 2 |
| 2077 | 3.91 | 4.1  | 11.99 | 7.659 | 4.769 | tr H0VVF4 H0VVF4_CAVPO | Uncharacterized protein OS=Cavia porcellus<br>GN=MDM1 PE=4 SV=1                               | CAVPO | 3 |
| 2078 | 3.9  | 4.23 | 22.63 | 15.7  | 6.697 | tr H0VB05 H0VB05_CAVPO | Uncharacterized protein OS=Cavia porcellus<br>GN=TRNT1 PE=3 SV=1                              | CAVPO | 3 |
| 2079 | 3.9  | 4.25 | 7.775 | 4.313 | 3.916 | tr H0VVG8 H0VVG8_CAVPO | Uncharacterized protein (Fragment) OS=Cavia<br>porcellus GN=CASZ1 PE=4 SV=1                   | CAVPO | 4 |
| 2080 | 3.89 | 3.96 | 13.85 | 13.85 | 13.85 | tr H0WBA4 H0WBA4_CAVPO | Uncharacterized protein (Fragment) OS=Cavia<br>porcellus GN=ATP6V0C PE=3 SV=1                 | CAVPO | 2 |
| 2081 | 3.89 | 3.96 | 15.83 | 15.83 | 15.83 | tr H0WBH9 H0WBH9_CAVPO | Uncharacterized protein (Fragment) OS=Cavia                                                   | CAVPO | 2 |

|      |      |      |       |       |       |                        |                                                                           |       |    |
|------|------|------|-------|-------|-------|------------------------|---------------------------------------------------------------------------|-------|----|
|      |      |      |       |       |       |                        | porcellus GN=ACOT13 PE=4 SV=1                                             |       |    |
| 2082 | 3.88 | 3.99 | 27.1  | 21.94 | 14.84 | tr H0V294 H0V294_CAVPO | Fibroblast growth factor (Fragment) OS=Cavia porcellus GN=FGF1 PE=3 SV=1  | CAVPO | 2  |
| 2083 | 3.86 | 10.9 | 42.03 | 28.57 | 26.37 | tr H0VGZ1 H0VGZ1_CAVPO | Uncharacterized protein (Fragment) OS=Cavia porcellus GN=ELAVL2 PE=4 SV=1 | CAVPO | 13 |
| 2084 | 3.86 | 4.13 | 14.66 | 13.54 | 8.72  | tr H0VKA6 H0VKA6_CAVPO | Uncharacterized protein OS=Cavia porcellus GN=PCCB PE=4 SV=1              | CAVPO | 3  |
| 2085 | 3.85 | 3.93 | 2.526 | 1.973 | 1.973 | tr H0V7B5 H0V7B5_CAVPO | Uncharacterized protein (Fragment) OS=Cavia porcellus GN=NPC1 PE=4 SV=1   | CAVPO | 2  |
| 2086 | 3.84 | 4.04 | 7.366 | 6.846 | 3.12  | tr H0VGS6 H0VGS6_CAVPO | Uncharacterized protein OS=Cavia porcellus GN=NUP133 PE=4 SV=1            | CAVPO | 3  |
| 2087 | 3.82 | 3.97 | 13.64 | 8.079 | 3.591 | tr H0W4J0 H0W4J0_CAVPO | Uncharacterized protein OS=Cavia porcellus GN=ISYNA1 PE=4 SV=1            | CAVPO | 2  |
| 2088 | 3.82 | 3.97 | 21.39 | 12.05 | 12.05 | tr H0W7Y7 H0W7Y7_CAVPO | Uncharacterized protein OS=Cavia porcellus GN=GIPC1 PE=4 SV=1             | CAVPO | 3  |
| 2089 | 3.82 | 3.97 | 29.72 | 27.31 | 13.25 | tr H0WCI4 H0WCI4_CAVPO | Uncharacterized protein OS=Cavia porcellus GN=HDHD3 PE=4 SV=1             | CAVPO | 2  |
| 2090 | 3.81 | 3.91 | 14.44 | 10.28 | 7.5   | tr H0V089 H0V089_CAVPO | Uncharacterized protein OS=Cavia porcellus GN=VSX2 PE=3 SV=1              | CAVPO | 2  |
| 2091 | 3.81 | 13.2 | 30.84 | 22.8  | 18.32 | tr H0V4K5 H0V4K5_CAVPO | Uncharacterized protein OS=Cavia porcellus GN=EHD3 PE=4 SV=1              | CAVPO | 8  |
| 2092 | 3.81 | 3.98 | 25.32 | 20.46 | 8.951 | tr H0VT92 H0VT92_CAVPO | Uncharacterized protein OS=Cavia porcellus GN=ILKAP PE=3 SV=1             | CAVPO | 3  |
| 2093 | 3.8  | 4.14 | 9.979 | 7.511 | 4.077 | tr H0VCS9 H0VCS9_CAVPO | Uncharacterized protein (Fragment) OS=Cavia porcellus GN=NUP107 PE=4 SV=1 | CAVPO | 3  |
| 2094 | 3.79 | 3.98 | 9.682 | 7.162 | 5.438 | tr H0UVN5 H0UVN5_CAVPO | Elongation factor G, mitochondrial OS=Cavia porcellus GN=GFM1 PE=3 SV=1   | CAVPO | 3  |



|      |      |      |       |       |       |                        |                                                                                  |       |   |
|------|------|------|-------|-------|-------|------------------------|----------------------------------------------------------------------------------|-------|---|
| 2095 | 3.79 | 3.96 | 5.751 | 4.257 | 2.539 | tr H0VDA2 H0VDA2_CAVPO | Uncharacterized protein (Fragment) OS=Cavia porcellus GN=CNTNAP1 PE=4 SV=1       | CAVPO | 3 |
| 2096 | 3.79 | 3.89 | 20.77 | 7.923 | 7.923 | tr H0VR36 H0VR36_CAVPO | Uncharacterized protein (Fragment) OS=Cavia porcellus GN=MAP2K4 PE=4 SV=1        | CAVPO | 2 |
| 2097 | 3.78 | 4    | 29.82 | 18.18 | 8.727 | tr H0V3E4 H0V3E4_CAVPO | Uncharacterized protein OS=Cavia porcellus GN=POLR2C PE=4 SV=1                   | CAVPO | 2 |
| 2098 | 3.78 | 4.07 | 40.94 | 33.56 | 30.87 | tr H0VIZ9 H0VIZ9_CAVPO | Uncharacterized protein (Fragment) OS=Cavia porcellus GN=Rps16 PE=3 SV=1         | CAVPO | 5 |
| 2099 | 3.78 | 3.9  | 16.24 | 5.791 | 4.096 | tr H0VJY9 H0VJY9_CAVPO | Uncharacterized protein OS=Cavia porcellus GN=TMCC2 PE=4 SV=1                    | CAVPO | 2 |
| 2100 | 3.78 | 3.95 | 28.8  | 28.8  | 21.2  | tr H0W306 H0W306_CAVPO | Uncharacterized protein OS=Cavia porcellus GN=RABL5 PE=4 SV=1                    | CAVPO | 3 |
| 2101 | 3.76 | 3.91 | 11.92 | 6.908 | 5.699 | tr H0VI47 H0VI47_CAVPO | Uncharacterized protein OS=Cavia porcellus GN=CDC40 PE=4 SV=1                    | CAVPO | 3 |
| 2102 | 3.76 | 3.9  | 9.991 | 3.268 | 3.268 | tr H0VTC5 H0VTC5_CAVPO | Uncharacterized protein (Fragment) OS=Cavia porcellus GN=ANKS1A PE=4 SV=1        | CAVPO | 3 |
| 2103 | 3.76 | 3.98 | 21.03 | 14.48 | 11.72 | tr H0W6L3 H0W6L3_CAVPO | Uncharacterized protein OS=Cavia porcellus GN=MBD3 PE=4 SV=1                     | CAVPO | 3 |
| 2104 | 3.75 | 3.83 | 9     | 5.25  | 5.25  | tr H0VVS4 H0VVS4_CAVPO | Uncharacterized protein (Fragment) OS=Cavia porcellus GN=BSCL2 PE=4 SV=1         | CAVPO | 3 |
| 2105 | 3.74 | 4.72 | 9.724 | 6.242 | 3.721 | tr H0VQR1 H0VQR1_CAVPO | Uncharacterized protein OS=Cavia porcellus GN=STT3B PE=4 SV=1                    | CAVPO | 4 |
| 2106 | 3.74 | 3.89 | 11.01 | 6.709 | 6.709 | tr H0WB62 H0WB62_CAVPO | Receptor-type tyrosine-protein phosphatase OS=Cavia porcellus GN=PTPRA PE=3 SV=1 | CAVPO | 4 |
| 2107 | 3.73 | 3.86 | 13.68 | 10.26 | 10.26 | tr H0V7M8 H0V7M8_CAVPO | Uncharacterized protein OS=Cavia porcellus GN=ARMC6 PE=4 SV=1                    | CAVPO | 3 |
| 2108 | 3.73 | 3.85 | 36.48 | 22.01 | 15.09 | tr H0VFR9 H0VFR9_CAVPO | Uncharacterized protein (Fragment) OS=Cavia porcellus GN=NDUFAF3 PE=4 SV=1       | CAVPO | 2 |

|      |      |      |       |       |       |                        |                                                                                 |       |   |
|------|------|------|-------|-------|-------|------------------------|---------------------------------------------------------------------------------|-------|---|
| 2109 | 3.73 | 3.96 | 5.993 | 3.12  | 2.135 | tr H0VH14 H0VH14_CAVPO | Uncharacterized protein OS=Cavia porcellus<br>GN=VCPIP1 PE=4 SV=1               | CAVPO | 2 |
| 2110 | 3.72 | 3.91 | 11.42 | 8.199 | 6.003 | tr H0VBH3 H0VBH3_CAVPO | Uncharacterized protein OS=Cavia porcellus<br>GN=PRPF3 PE=4 SV=1                | CAVPO | 3 |
| 2111 | 3.72 | 4.66 | 9.428 | 2.441 | 2.441 | tr H0VPJ3 H0VPJ3_CAVPO | Uncharacterized protein (Fragment) OS=Cavia<br>porcellus GN=WDR33 PE=4 SV=1     | CAVPO | 3 |
| 2112 | 3.7  | 3.97 | 15.95 | 15.95 | 13.23 | tr H0VXR3 H0VXR3_CAVPO | Uncharacterized protein OS=Cavia porcellus<br>GN=RPL8 PE=3 SV=1                 | CAVPO | 3 |
| 2113 | 3.69 | 3.93 | 34.06 | 25.33 | 19.21 | tr H0VEH1 H0VEH1_CAVPO | Uncharacterized protein (Fragment) OS=Cavia<br>porcellus GN=NIPSNAP3A PE=4 SV=1 | CAVPO | 4 |
| 2114 | 3.69 | 3.83 | 17.8  | 11.3  | 8.757 | tr H0VR47 H0VR47_CAVPO | Uncharacterized protein OS=Cavia porcellus<br>GN=L3HYPDH PE=4 SV=1              | CAVPO | 2 |
| 2115 | 3.68 | 3.87 | 9.95  | 9.95  | 7.131 | tr Q9TEG1 Q9TEG1_CAVPO | NADH-ubiquinone oxidoreductase chain 5<br>OS=Cavia porcellus GN=NADH5 PE=3 SV=1 | CAVPO | 3 |
| 2116 | 3.66 | 3.86 | 11.16 | 6.803 | 4.082 | tr H0UXT7 H0UXT7_CAVPO | Uncharacterized protein OS=Cavia porcellus<br>GN=DDX50 PE=4 SV=1                | CAVPO | 3 |
| 2117 | 3.66 | 3.79 | 22.43 | 7.477 | 7.477 | tr H0VIZ6 H0VIZ6_CAVPO | Uncharacterized protein OS=Cavia porcellus<br>GN=PAF1 PE=4 SV=1                 | CAVPO | 3 |
| 2118 | 3.66 | 3.72 | 12    | 8.333 | 8.333 | tr H0W4Q2 H0W4Q2_CAVPO | Uncharacterized protein OS=Cavia porcellus<br>GN=SLC25A35 PE=3 SV=1             | CAVPO | 2 |
| 2119 | 3.65 | 3.82 | 11.72 | 6.345 | 2.759 | tr H0UX18 H0UX18_CAVPO | Uncharacterized protein OS=Cavia porcellus<br>GN=BRD3 PE=4 SV=1                 | CAVPO | 2 |
| 2120 | 3.64 | 3.73 | 22.54 | 22.54 | 14.79 | tr H0UYN3 H0UYN3_CAVPO | Uncharacterized protein OS=Cavia porcellus<br>GN=LAMTOR2 PE=4 SV=1              | CAVPO | 4 |
| 2121 | 3.64 | 3.75 | 36.73 | 35.71 | 18.37 | tr H0W8Z0 H0W8Z0_CAVPO | Uncharacterized protein OS=Cavia porcellus<br>GN=NDUFB3 PE=4 SV=1               | CAVPO | 2 |
| 2122 | 3.63 | 3.74 | 21.55 | 21.55 | 21.55 | tr H0V1N1 H0V1N1_CAVPO | Uncharacterized protein OS=Cavia porcellus<br>GN=NDUFS6 PE=4 SV=1               | CAVPO | 2 |

|      |      |      |       |       |       |                        |                                                                                   |       |   |
|------|------|------|-------|-------|-------|------------------------|-----------------------------------------------------------------------------------|-------|---|
| 2123 | 3.63 | 3.82 | 29.51 | 16.39 | 16.39 | tr H0V4M4 H0V4M4_CAVPO | Uncharacterized protein OS=Cavia porcellus<br>GN=UBE2H PE=3 SV=1                  | CAVPO | 2 |
| 2124 | 3.62 | 3.86 | 11.07 | 8.544 | 4.332 | tr H0V4M6 H0V4M6_CAVPO | Uncharacterized protein (Fragment) OS=Cavia<br>porcellus GN=CARS PE=3 SV=1        | CAVPO | 2 |
| 2125 | 3.6  | 3.75 | 21.7  | 16.04 | 10.69 | tr H0UWM1 H0UWM1_CAVPO | Uncharacterized protein OS=Cavia porcellus<br>GN=UBLCP1 PE=4 SV=1                 | CAVPO | 3 |
| 2126 | 3.6  | 3.69 | 20.5  | 12.97 | 7.531 | tr H0VHT8 H0VHT8_CAVPO | Uncharacterized protein OS=Cavia porcellus<br>GN=LYPLAL1 PE=4 SV=1                | CAVPO | 2 |
| 2127 | 3.6  | 3.69 | 16.9  | 12.21 | 8.216 | tr H0VMN1 H0VMN1_CAVPO | Uncharacterized protein OS=Cavia porcellus<br>GN=ZC3H15 PE=4 SV=1                 | CAVPO | 2 |
| 2128 | 3.6  | 3.68 | 20    | 20    | 20    | tr H0VTA8 H0VTA8_CAVPO | Uncharacterized protein OS=Cavia porcellus<br>GN=Trmt112 PE=4 SV=1                | CAVPO | 2 |
| 2129 | 3.6  | 3.71 | 16.74 | 14.32 | 7.93  | tr H0W1Y8 H0W1Y8_CAVPO | Uncharacterized protein (Fragment) OS=Cavia<br>porcellus GN=NOVA2 PE=4 SV=1       | CAVPO | 3 |
| 2130 | 3.6  | 3.7  | 13.24 | 6.721 | 5.092 | tr H0WBZ5 H0WBZ5_CAVPO | Uncharacterized protein OS=Cavia porcellus<br>GN=ALG11 PE=4 SV=1                  | CAVPO | 2 |
| 2131 | 3.59 | 3.64 | 30.16 | 30.16 | 30.16 | tr H0VC82 H0VC82_CAVPO | Uncharacterized protein OS=Cavia porcellus<br>GN=SRP9 PE=4 SV=1                   | CAVPO | 2 |
| 2132 | 3.58 | 3.76 | 15.74 | 6.085 | 3.175 | tr H0UU40 H0UU40_CAVPO | Uncharacterized protein OS=Cavia porcellus<br>GN=LIMA1 PE=4 SV=1                  | CAVPO | 2 |
| 2133 | 3.58 | 3.92 | 17.08 | 16.8  | 6.612 | tr H0V6R3 H0V6R3_CAVPO | Uncharacterized protein (Fragment) OS=Cavia<br>porcellus GN=FAM50A PE=4 SV=1      | CAVPO | 2 |
| 2134 | 3.58 | 3.65 | 11.48 | 7.65  | 7.65  | tr H0W0J3 H0W0J3_CAVPO | Histone-lysine N-methyltransferase SETD7<br>OS=Cavia porcellus GN=SETD7 PE=3 SV=1 | CAVPO | 2 |
| 2135 | 3.58 | 3.91 | 22.19 | 15.93 | 5.744 | tr H0W3L7 H0W3L7_CAVPO | Uncharacterized protein OS=Cavia porcellus<br>GN=COPG2 PE=4 SV=1                  | CAVPO | 2 |
| 2136 | 3.57 | 3.75 | 21.84 | 17.48 | 9.223 | tr H0UVS9 H0UVS9_CAVPO | Uncharacterized protein OS=Cavia porcellus<br>GN=BLVRB PE=4 SV=1                  | CAVPO | 2 |

|      |      |      |       |       |       |                        |                                                                                                    |       |   |
|------|------|------|-------|-------|-------|------------------------|----------------------------------------------------------------------------------------------------|-------|---|
| 2137 | 3.57 | 4.65 | 7.779 | 5.375 | 5.375 | tr H0VPD7 H0VPD7_CAVPO | Choline transporter-like protein 2 OS=Cavia porcellus GN=SLC44A2 PE=4 SV=1                         | CAVPO | 4 |
| 2138 | 3.57 | 3.66 | 9.189 | 4.865 | 4.865 | tr H0W2N8 H0W2N8_CAVPO | Uncharacterized protein (Fragment) OS=Cavia porcellus GN=PGS1 PE=4 SV=1                            | CAVPO | 2 |
| 2139 | 3.56 | 3.71 | 10.63 | 7.975 | 3.544 | tr H0VXN9 H0VXN9_CAVPO | Signal transducer and activator of transcription (Fragment) OS=Cavia porcellus GN=Stat5b PE=3 SV=1 | CAVPO | 3 |
| 2140 | 3.55 | 3.62 | 24.6  | 24.6  | 24.6  | tr H0WDR4 H0WDR4_CAVPO | Uncharacterized protein OS=Cavia porcellus GN=C12orf57 PE=4 SV=1                                   | CAVPO | 2 |
| 2141 | 3.54 | 3.66 | 24.84 | 24.84 | 24.84 | tr H0V0N9 H0V0N9_CAVPO | Single-stranded DNA-binding protein OS=Cavia porcellus GN=SSBP1 PE=3 SV=1                          | CAVPO | 3 |
| 2142 | 3.54 | 3.7  | 10    | 5.596 | 4.495 | tr H0VSF2 H0VSF2_CAVPO | Uncharacterized protein OS=Cavia porcellus GN=FUK PE=3 SV=1                                        | CAVPO | 3 |
| 2143 | 3.52 | 3.68 | 11.68 | 9.137 | 5.584 | tr H0UVK8 H0UVK8_CAVPO | Uncharacterized protein (Fragment) OS=Cavia porcellus GN=PAG1 PE=4 SV=1                            | CAVPO | 2 |
| 2144 | 3.52 | 3.61 | 19.61 | 14.71 | 11.27 | tr H0UY44 H0UY44_CAVPO | Ribosomal protein L15 OS=Cavia porcellus GN=RPL15 PE=3 SV=1                                        | CAVPO | 2 |
| 2145 | 3.51 | 3.7  | 24.51 | 20.33 | 8.357 | tr H0UY67 H0UY67_CAVPO | Uncharacterized protein (Fragment) OS=Cavia porcellus GN=GDAP1 PE=4 SV=1                           | CAVPO | 3 |
| 2146 | 3.51 | 3.59 | 10.67 | 4.296 | 4.296 | tr H0V0J4 H0V0J4_CAVPO | Uncharacterized protein OS=Cavia porcellus GN=MPP5 PE=4 SV=1                                       | CAVPO | 2 |
| 2147 | 3.51 | 3.7  | 5.858 | 4.15  | 1.871 | tr H0VNI9 H0VNI9_CAVPO | Uncharacterized protein (Fragment) OS=Cavia porcellus GN=ZMYND8 PE=4 SV=1                          | CAVPO | 2 |
| 2148 | 3.5  | 3.82 | 18.4  | 18.4  | 16.87 | tr H0UXN6 H0UXN6_CAVPO | Uncharacterized protein OS=Cavia porcellus GN=MLST8 PE=4 SV=1                                      | CAVPO | 3 |
| 2149 | 3.5  | 3.72 | 6.05  | 3.139 | 2.055 | tr H0V0P1 H0V0P1_CAVPO | Uncharacterized protein (Fragment) OS=Cavia porcellus GN=RP1L1 PE=4 SV=1                           | CAVPO | 3 |
| 2150 | 3.5  | 3.69 | 11.73 | 5.537 | 4.072 | tr H0V143 H0V143_CAVPO | Uncharacterized protein OS=Cavia porcellus                                                         | CAVPO | 2 |

|      |      |      |       |       |       |                        |                                                                             |       |   |
|------|------|------|-------|-------|-------|------------------------|-----------------------------------------------------------------------------|-------|---|
|      |      |      |       |       |       |                        | GN=XRCC6 PE=4 SV=1                                                          |       |   |
| 2151 | 3.49 | 3.57 | 5.882 | 2.222 | 1.373 | tr H0VG49 H0VG49_CAVPO | Uncharacterized protein (Fragment) OS=Cavia porcellus GN=ZNF638 PE=4 SV=1   | CAVPO | 2 |
| 2152 | 3.49 | 3.62 | 23.51 | 12.91 | 8.609 | tr H0VUW5 H0VUW5_CAVPO | Uncharacterized protein (Fragment) OS=Cavia porcellus GN=WDR61 PE=4 SV=1    | CAVPO | 2 |
| 2153 | 3.49 | 3.61 | 24.49 | 24.49 | 24.49 | tr H0W4B9 H0W4B9_CAVPO | Uncharacterized protein OS=Cavia porcellus GN=UBE2D3 PE=3 SV=1              | CAVPO | 6 |
| 2154 | 3.48 | 4.26 | 7.058 | 4.235 | 4.235 | tr H0UU87 H0UU87_CAVPO | Ubiquitin carboxyl-terminal hydrolase OS=Cavia porcellus GN=USP15 PE=3 SV=1 | CAVPO | 4 |
| 2155 | 3.48 | 3.65 | 10.75 | 10.57 | 4.839 | tr H0VHQ3 H0VHQ3_CAVPO | Uncharacterized protein OS=Cavia porcellus GN=ABHD16A PE=4 SV=1             | CAVPO | 2 |
| 2156 | 3.48 | 4.11 | 6.089 | 5.057 | 3.199 | tr H0VHU4 H0VHU4_CAVPO | Uncharacterized protein (Fragment) OS=Cavia porcellus GN=EPHB2 PE=4 SV=1    | CAVPO | 2 |
| 2157 | 3.48 | 3.58 | 17.71 | 11.44 | 7.749 | tr H0VIF1 H0VIF1_CAVPO | Uncharacterized protein (Fragment) OS=Cavia porcellus GN=MTX2 PE=4 SV=1     | CAVPO | 2 |
| 2158 | 3.48 | 3.63 | 4.251 | 1.756 | 1.756 | tr H0VLG3 H0VLG3_CAVPO | Uncharacterized protein (Fragment) OS=Cavia porcellus GN=SCAF4 PE=4 SV=1    | CAVPO | 2 |
| 2159 | 3.48 | 3.79 | 21.74 | 12.11 | 6.832 | tr H0VUC7 H0VUC7_CAVPO | Uncharacterized protein OS=Cavia porcellus GN=PPWD1 PE=4 SV=1               | CAVPO | 3 |
| 2160 | 3.47 | 3.55 | 12.3  | 10.71 | 7.517 | tr H0UXX6 H0UXX6_CAVPO | Uncharacterized protein OS=Cavia porcellus GN=MFAP1 PE=4 SV=1               | CAVPO | 3 |
| 2161 | 3.47 | 3.56 | 12.87 | 9.885 | 7.816 | tr H0V0B1 H0V0B1_CAVPO | Uncharacterized protein OS=Cavia porcellus GN=NXN PE=4 SV=1                 | CAVPO | 2 |
| 2162 | 3.46 | 3.62 | 19.27 | 12.5  | 12.5  | tr H0VIM5 H0VIM5_CAVPO | Uncharacterized protein OS=Cavia porcellus GN=BAX PE=4 SV=1                 | CAVPO | 2 |
| 2163 | 3.46 | 3.52 | 39.06 | 37.5  | 37.5  | tr H0VIM6 H0VIM6_CAVPO | Uncharacterized protein OS=Cavia porcellus GN=UQCR10 PE=4 SV=1              | CAVPO | 2 |

|      |      |      |       |       |       |                        |                                                                            |       |   |
|------|------|------|-------|-------|-------|------------------------|----------------------------------------------------------------------------|-------|---|
| 2164 | 3.46 | 3.54 | 28.39 | 28.39 | 15.48 | tr H0WA58 H0WA58_CAVPO | Uncharacterized protein (Fragment) OS=Cavia porcellus GN=HINT3 PE=4 SV=1   | CAVPO | 2 |
| 2165 | 3.45 | 3.56 | 41.75 | 27.18 | 27.18 | tr H0VM11 H0VM11_CAVPO | Uncharacterized protein (Fragment) OS=Cavia porcellus GN=PCBD1 PE=3 SV=1   | CAVPO | 3 |
| 2166 | 3.45 | 3.52 | 48.25 | 40.35 | 40.35 | tr H0VS83 H0VS83_CAVPO | Uncharacterized protein OS=Cavia porcellus GN=COX7A2L PE=4 SV=1            | CAVPO | 2 |
| 2167 | 3.45 | 3.75 | 7.527 | 7.348 | 4.659 | tr H0W1K7 H0W1K7_CAVPO | Uncharacterized protein (Fragment) OS=Cavia porcellus GN=YTHDF2 PE=4 SV=1  | CAVPO | 2 |
| 2168 | 3.44 | 3.56 | 3.955 | 2.637 | 2.637 | tr H0UU68 H0UU68_CAVPO | Uncharacterized protein OS=Cavia porcellus GN=TSC22D1 PE=4 SV=1            | CAVPO | 3 |
| 2169 | 3.44 | 3.63 | 11.78 | 7.36  | 2.159 | tr H0UUS1 H0UUS1_CAVPO | Uncharacterized protein OS=Cavia porcellus GN=IDE PE=3 SV=1                | CAVPO | 2 |
| 2170 | 3.43 | 3.51 | 8.812 | 8.812 | 8.812 | tr H0UXA9 H0UXA9_CAVPO | Uncharacterized protein (Fragment) OS=Cavia porcellus GN=RNF170 PE=4 SV=1  | CAVPO | 2 |
| 2171 | 3.43 | 5.62 | 9.156 | 7.181 | 5.566 | tr H0V113 H0V113_CAVPO | Uncharacterized protein OS=Cavia porcellus GN=CPNE6 PE=4 SV=1              | CAVPO | 3 |
| 2172 | 3.42 | 3.57 | 34.59 | 28.65 | 12.97 | tr H0V773 H0V773_CAVPO | Uncharacterized protein (Fragment) OS=Cavia porcellus GN=MANF PE=4 SV=1    | CAVPO | 2 |
| 2173 | 3.42 | 3.53 | 50    | 34.88 | 24.42 | tr H0VLF5 H0VLF5_CAVPO | Uncharacterized protein OS=Cavia porcellus GN=SF3B5 PE=4 SV=1              | CAVPO | 2 |
| 2174 | 3.42 | 6.35 | 19.63 | 11.16 | 9.04  | tr H0VUI7 H0VUI7_CAVPO | Uncharacterized protein (Fragment) OS=Cavia porcellus GN=MTA1 PE=4 SV=1    | CAVPO | 6 |
| 2175 | 3.42 | 3.68 | 35.1  | 22.6  | 15.87 | tr H0WAS1 H0WAS1_CAVPO | Uncharacterized protein OS=Cavia porcellus GN=MESDC2 PE=4 SV=1             | CAVPO | 3 |
| 2176 | 3.41 | 3.68 | 20.66 | 20.66 | 14.43 | tr H0V476 H0V476_CAVPO | Serine/threonine-protein phosphatase OS=Cavia porcellus GN=PPP6C PE=3 SV=1 | CAVPO | 3 |
| 2177 | 3.41 | 3.49 | 33.09 | 19.12 | 19.12 | tr H0V6E4 H0V6E4_CAVPO | Uncharacterized protein OS=Cavia porcellus GN=SNAPIN PE=4 SV=1             | CAVPO | 2 |

|      |      |      |       |       |       |                        |                                                                                              |       |   |
|------|------|------|-------|-------|-------|------------------------|----------------------------------------------------------------------------------------------|-------|---|
| 2178 | 3.41 | 12.2 | 54.44 | 51.11 | 47.78 | tr H0VGN3 H0VGN3_CAVPO | Uncharacterized protein OS=Cavia porcellus<br>GN=ARF4 PE=3 SV=1                              | CAVPO | 8 |
| 2179 | 3.41 | 3.63 | 28.07 | 22.81 | 22.81 | tr H0WDP2 H0WDP2_CAVPO | 2'-deoxynucleoside 5'-phosphate N-hydrolase<br>1 OS=Cavia porcellus GN=DNPH1 PE=3 SV=1       | CAVPO | 2 |
| 2180 | 3.4  | 3.47 | 8.219 | 6.575 | 6.575 | tr H0UYB2 H0UYB2_CAVPO | Uncharacterized protein OS=Cavia porcellus<br>GN=LOC100713047 PE=3 SV=1                      | CAVPO | 2 |
| 2181 | 3.4  | 3.52 | 20.38 | 16.61 | 6.583 | tr H0W9L8 H0W9L8_CAVPO | Uncharacterized protein OS=Cavia porcellus<br>GN=RDH14 PE=3 SV=1                             | CAVPO | 2 |
| 2182 | 3.39 | 3.58 | 15.13 | 9.963 | 9.963 | tr H0V512 H0V512_CAVPO | Uncharacterized protein (Fragment) OS=Cavia<br>porcellus GN=AQP11 PE=3 SV=1                  | CAVPO | 2 |
| 2183 | 3.38 | 3.51 | 5.312 | 2.049 | 2.049 | tr H0V3B4 H0V3B4_CAVPO | Uncharacterized protein (Fragment) OS=Cavia<br>porcellus GN=NBEA PE=4 SV=1                   | CAVPO | 3 |
| 2184 | 3.37 | 3.47 | 14.43 | 3.659 | 2.846 | tr H0UVL4 H0UVL4_CAVPO | Uncharacterized protein (Fragment) OS=Cavia<br>porcellus GN=FARP1 PE=4 SV=1                  | CAVPO | 2 |
| 2185 | 3.37 | 3.52 | 5.373 | 3.289 | 2.083 | tr H0VG12 H0VG12_CAVPO | Uncharacterized protein (Fragment) OS=Cavia<br>porcellus GN=Mthfd11 PE=3 SV=1                | CAVPO | 2 |
| 2186 | 3.37 | 3.54 | 25.53 | 15.32 | 10.21 | tr H0VV40 H0VV40_CAVPO | Uncharacterized protein (Fragment) OS=Cavia<br>porcellus GN=SRA1 PE=4 SV=1                   | CAVPO | 2 |
| 2187 | 3.36 | 3.59 | 25.32 | 14.14 | 5.907 | tr H0VSU8 H0VSU8_CAVPO | Uncharacterized protein OS=Cavia porcellus<br>GN=GABRB2 PE=3 SV=1                            | CAVPO | 2 |
| 2188 | 3.36 | 3.58 | 33.19 | 25.33 | 16.59 | tr H0VXH6 H0VXH6_CAVPO | Uncharacterized protein (Fragment) OS=Cavia<br>porcellus GN=CLIC6 PE=4 SV=1                  | CAVPO | 3 |
| 2189 | 3.35 | 3.47 | 6.355 | 2.983 | 2.983 | tr H0VB80 H0VB80_CAVPO | Signal transducer and activator of<br>transcription OS=Cavia porcellus GN=STAT3<br>PE=3 SV=1 | CAVPO | 2 |
| 2190 | 3.35 | 3.44 | 58.97 | 41.03 | 29.91 | tr H0VCA9 H0VCA9_CAVPO | Uncharacterized protein OS=Cavia porcellus<br>GN=C12orf23 PE=4 SV=1                          | CAVPO | 2 |
| 2191 | 3.34 | 3.47 | 5.128 | 4.103 | 4.103 | tr H0V4N4 H0V4N4_CAVPO | Uncharacterized protein OS=Cavia porcellus                                                   | CAVPO | 2 |

|      |      |      |       |       |       |                        |                                                                                              |       |    |
|------|------|------|-------|-------|-------|------------------------|----------------------------------------------------------------------------------------------|-------|----|
|      |      |      |       |       |       |                        | GN=ZW10 PE=4 SV=1                                                                            |       |    |
| 2192 | 3.34 | 4.03 | 24.92 | 18.36 | 7.213 | tr H0VFX9 H0VFX9_CAVPO | Uncharacterized protein OS=Cavia porcellus<br>GN=EIF2B1 PE=3 SV=1                            | CAVPO | 2  |
| 2193 | 3.33 | 3.4  | 11.25 | 4.279 | 4.279 | tr H0VL40 H0VL40_CAVPO | Uncharacterized protein OS=Cavia porcellus<br>GN=TBRG4 PE=4 SV=1                             | CAVPO | 2  |
| 2194 | 3.32 | 3.42 | 4.229 | 4.229 | 2.865 | tr H0VP63 H0VP63_CAVPO | Uncharacterized protein OS=Cavia porcellus<br>GN=ZC3H14 PE=4 SV=1                            | CAVPO | 2  |
| 2195 | 3.31 | 3.4  | 30.14 | 27.4  | 16.44 | tr H0VM93 H0VM93_CAVPO | Uncharacterized protein OS=Cavia porcellus<br>GN=RBPM5 PE=4 SV=1                             | CAVPO | 2  |
| 2196 | 3.3  | 3.65 | 18.8  | 18.55 | 9.023 | tr H0V2C4 H0V2C4_CAVPO | Uncharacterized protein OS=Cavia porcellus<br>GN=ABHD12 PE=4 SV=1                            | CAVPO | 4  |
| 2197 | 3.29 | 3.38 | 35.81 | 22.97 | 18.24 | tr H0WA12 H0WA12_CAVPO | Uncharacterized protein OS=Cavia porcellus<br>GN=EDF1 PE=4 SV=1                              | CAVPO | 2  |
| 2198 | 3.28 | 3.4  | 8.423 | 6.989 | 4.48  | tr H0V1E6 H0V1E6_CAVPO | Uncharacterized protein OS=Cavia porcellus<br>GN=ARIH1 PE=4 SV=1                             | CAVPO | 2  |
| 2199 | 3.28 | 3.34 | 10.89 | 9.556 | 7.778 | tr H0W2W9 H0W2W9_CAVPO | Uncharacterized protein OS=Cavia porcellus<br>GN=SF3A2 PE=4 SV=1                             | CAVPO | 2  |
| 2200 | 3.28 | 3.74 | 38.1  | 38.1  | 38.1  | tr H0W4Y4 H0W4Y4_CAVPO | Uncharacterized protein OS=Cavia porcellus<br>GN=MYCBP PE=4 SV=1                             | CAVPO | 3  |
| 2201 | 3.28 | 3.34 | 20    | 20    | 20    | tr H0W7S0 H0W7S0_CAVPO | Uncharacterized protein OS=Cavia porcellus<br>GN=RPL32 PE=4 SV=1                             | CAVPO | 3  |
| 2202 | 3.28 | 3.43 | 39.62 | 27.36 | 19.81 | tr H0WCA3 H0WCA3_CAVPO | 60S ribosomal protein L36 OS=Cavia porcellus<br>GN=RPL36 PE=3 SV=1                           | CAVPO | 2  |
| 2203 | 3.26 | 17.3 | 25.19 | 22.71 | 20.8  | tr H0VBD6 H0VBD6_CAVPO | Serine/threonine-protein phosphatase<br>(Fragment) OS=Cavia porcellus GN=PPP3CB<br>PE=3 SV=1 | CAVPO | 11 |
| 2204 | 3.26 | 3.32 | 16.42 | 16.42 | 16.42 | tr H0VGG2 H0VGG2_CAVPO | Uncharacterized protein OS=Cavia porcellus<br>GN=BOLA1 PE=3 SV=1                             | CAVPO | 2  |



|      |      |      |       |       |       |                        |                                                                                |       |   |
|------|------|------|-------|-------|-------|------------------------|--------------------------------------------------------------------------------|-------|---|
| 2205 | 3.26 | 3.65 | 15.59 | 9.197 | 2.962 | tr H0VXE6 H0VXE6_CAVPO | Uncharacterized protein OS=Cavia porcellus<br>GN=SON PE=4 SV=1                 | CAVPO | 2 |
| 2206 | 3.25 | 3.33 | 7.399 | 4.036 | 3.139 | tr H0UYQ5 H0UYQ5_CAVPO | Uncharacterized protein OS=Cavia porcellus<br>GN=RBM27 PE=4 SV=1               | CAVPO | 2 |
| 2207 | 3.25 | 3.39 | 6.555 | 4.603 | 2.301 | tr H0V541 H0V541_CAVPO | Uncharacterized protein (Fragment) OS=Cavia<br>porcellus GN=NUP160 PE=4 SV=1   | CAVPO | 2 |
| 2208 | 3.25 | 3.37 | 16.25 | 11.87 | 8.75  | tr H0V602 H0V602_CAVPO | Pyrroline-5-carboxylate reductase OS=Cavia<br>porcellus GN=Pycr2 PE=3 SV=1     | CAVPO | 2 |
| 2209 | 3.24 | 3.32 | 6.798 | 3.448 | 2.562 | tr H0UXK3 H0UXK3_CAVPO | Uncharacterized protein OS=Cavia porcellus<br>GN=EGFLAM PE=4 SV=1              | CAVPO | 2 |
| 2210 | 3.24 | 3.49 | 13.88 | 8.373 | 8.373 | tr H0UYT9 H0UYT9_CAVPO | Uncharacterized protein OS=Cavia porcellus<br>GN=BCS1L PE=3 SV=1               | CAVPO | 3 |
| 2211 | 3.24 | 3.45 | 22.6  | 8.312 | 6.234 | tr H0V990 H0V990_CAVPO | Uncharacterized protein (Fragment) OS=Cavia<br>porcellus GN=PRPF38B PE=4 SV=1  | CAVPO | 2 |
| 2212 | 3.24 | 3.32 | 9.296 | 7.789 | 5.151 | tr H0VFK6 H0VFK6_CAVPO | Uncharacterized protein (Fragment) OS=Cavia<br>porcellus GN=SEL1L PE=4 SV=1    | CAVPO | 2 |
| 2213 | 3.23 | 3.75 | 8.514 | 4.452 | 1.781 | tr H0V1B3 H0V1B3_CAVPO | Uncharacterized protein (Fragment) OS=Cavia<br>porcellus GN=PTPRD PE=4 SV=1    | CAVPO | 3 |
| 2214 | 3.22 | 3.49 | 17.08 | 14.99 | 5.123 | tr H0V9C6 H0V9C6_CAVPO | Uncharacterized protein (Fragment) OS=Cavia<br>porcellus GN=HMGCS1 PE=4 SV=1   | CAVPO | 2 |
| 2215 | 3.22 | 3.51 | 13.76 | 8.734 | 5.24  | tr H0VIE8 H0VIE8_CAVPO | Uncharacterized protein (Fragment) OS=Cavia<br>porcellus GN=SLC25A23 PE=3 SV=1 | CAVPO | 2 |
| 2216 | 3.22 | 3.29 | 7.796 | 5.376 | 5.376 | tr H0VIS9 H0VIS9_CAVPO | Uncharacterized protein (Fragment) OS=Cavia<br>porcellus GN=LPGAT1 PE=4 SV=1   | CAVPO | 2 |
| 2217 | 3.22 | 3.29 | 18.75 | 18.75 | 18.75 | tr H0VXQ6 H0VXQ6_CAVPO | Uncharacterized protein OS=Cavia porcellus<br>GN=RPL22 PE=4 SV=1               | CAVPO | 2 |
| 2218 | 3.21 | 3.28 | 8.798 | 8.798 | 8.798 | tr H0UWD6 H0UWD6_CAVPO | Uncharacterized protein OS=Cavia porcellus<br>GN=PRRT2 PE=4 SV=1               | CAVPO | 2 |

|      |      |      |       |       |       |                          |                                                                                         |       |    |
|------|------|------|-------|-------|-------|--------------------------|-----------------------------------------------------------------------------------------|-------|----|
| 2219 | 3.21 | 3.31 | 9.663 | 5.281 | 2.809 | tr H0VQNQ8 H0VQNQ8_CAVPO | Uncharacterized protein OS=Cavia porcellus<br>GN=ERMP1 PE=4 SV=1                        | CAVPO | 2  |
| 2220 | 3.2  | 3.43 | 35.05 | 19.59 | 8.763 | tr H0W169 H0W169_CAVPO   | Uncharacterized protein OS=Cavia porcellus<br>GN=RPS9 PE=3 SV=1                         | CAVPO | 2  |
| 2221 | 3.19 | 12.2 | 29.78 | 24.26 | 16.91 | tr H0UTB5 H0UTB5_CAVPO   | Uncharacterized protein OS=Cavia porcellus<br>GN=PAK1 PE=4 SV=1                         | CAVPO | 7  |
| 2222 | 3.19 | 3.25 | 29.86 | 15.97 | 15.97 | tr H0V641 H0V641_CAVPO   | Uncharacterized protein OS=Cavia porcellus<br>GN=CCDC58 PE=4 SV=1                       | CAVPO | 2  |
| 2223 | 3.19 | 3.25 | 8.193 | 7.143 | 7.143 | tr H0VTJ3 H0VTJ3_CAVPO   | Uncharacterized protein OS=Cavia porcellus<br>GN=SHPK PE=4 SV=1                         | CAVPO | 2  |
| 2224 | 3.18 | 3.26 | 21.49 | 17.11 | 12.72 | tr H0VKB1 H0VKB1_CAVPO   | GTP:AMP phosphotransferase AK3,<br>mitochondrial OS=Cavia porcellus GN=AK3<br>PE=3 SV=1 | CAVPO | 2  |
| 2225 | 3.18 | 25.9 | 16.57 | 13.76 | 11.34 | tr H0W3K3 H0W3K3_CAVPO   | Calcium-transporting ATPase OS=Cavia<br>porcellus GN=ATP2B2 PE=3 SV=1                   | CAVPO | 14 |
| 2226 | 3.17 | 3.36 | 18.45 | 18.45 | 18.45 | tr H0VAX4 H0VAX4_CAVPO   | Uncharacterized protein OS=Cavia porcellus<br>GN=CABP4 PE=4 SV=1                        | CAVPO | 4  |
| 2227 | 3.17 | 3.23 | 27.38 | 27.38 | 27.38 | tr H0VFK4 H0VFK4_CAVPO   | Uncharacterized protein (Fragment) OS=Cavia<br>porcellus GN=VMA21 PE=4 SV=1             | CAVPO | 2  |
| 2228 | 3.17 | 3.25 | 6.171 | 2.314 | 1.613 | tr H0VLQ2 H0VLQ2_CAVPO   | Uncharacterized protein OS=Cavia porcellus<br>GN=TRAPPC8 PE=4 SV=1                      | CAVPO | 2  |
| 2229 | 3.15 | 3.26 | 7.475 | 4.87  | 3.398 | tr H0UTT2 H0UTT2_CAVPO   | Uncharacterized protein OS=Cavia porcellus<br>GN=Gria2 PE=4 SV=1                        | CAVPO | 2  |
| 2230 | 3.15 | 3.4  | 29.75 | 17.85 | 5.263 | tr H0V1H6 H0V1H6_CAVPO   | Uncharacterized protein OS=Cavia porcellus<br>GN=Vps4a PE=3 SV=1                        | CAVPO | 2  |
| 2231 | 3.15 | 5.46 | 57.49 | 34.82 | 24.29 | tr H0VLZ8 H0VLZ8_CAVPO   | Uncharacterized protein (Fragment) OS=Cavia<br>porcellus GN=PPA2 PE=4 SV=1              | CAVPO | 4  |
| 2232 | 3.15 | 3.27 | 13.68 | 12.42 | 5.474 | tr H0VX81 H0VX81_CAVPO   | Uncharacterized protein OS=Cavia porcellus                                              | CAVPO | 2  |

|      |      |      |       |       |       |                        |                                                                                     |       |    |
|------|------|------|-------|-------|-------|------------------------|-------------------------------------------------------------------------------------|-------|----|
|      |      |      |       |       |       |                        | GN=PARS2 PE=3 SV=1                                                                  |       |    |
| 2233 | 3.14 | 10.1 | 17.51 | 7.856 | 5.948 | tr H0V126 H0V126_CAVPO | Uncharacterized protein (Fragment) OS=Cavia porcellus GN=CUL4B PE=3 SV=1            | CAVPO | 5  |
| 2234 | 3.14 | 3.32 | 4.664 | 4.664 | 4.664 | tr H0VM74 H0VM74_CAVPO | Transporter (Fragment) OS=Cavia porcellus GN=SLC6A17 PE=3 SV=1                      | CAVPO | 3  |
| 2235 | 3.14 | 3.21 | 31.28 | 24.17 | 24.17 | tr H0VNF8 H0VNF8_CAVPO | Uncharacterized protein OS=Cavia porcellus GN=SDF2 PE=4 SV=1                        | CAVPO | 3  |
| 2236 | 3.13 | 3.32 | 23.01 | 20.35 | 17.26 | tr H0V9Q2 H0V9Q2_CAVPO | Uncharacterized protein OS=Cavia porcellus GN=SPCS2 PE=4 SV=1                       | CAVPO | 3  |
| 2237 | 3.13 | 3.2  | 35.57 | 35.57 | 28.19 | tr H0W809 H0W809_CAVPO | Uncharacterized protein OS=Cavia porcellus GN=CARHSP1 PE=4 SV=1                     | CAVPO | 2  |
| 2238 | 3.12 | 3.19 | 8.257 | 8.257 | 8.257 | tr H0UY91 H0UY91_CAVPO | Uncharacterized protein (Fragment) OS=Cavia porcellus GN=GET4 PE=4 SV=1             | CAVPO | 2  |
| 2239 | 3.12 | 3.2  | 27.73 | 27.73 | 27.73 | tr H0VLC2 H0VLC2_CAVPO | NADH dehydrogenase [ubiquinone] 1 subunit C2 OS=Cavia porcellus GN=Ndufc2 PE=3 SV=1 | CAVPO | 3  |
| 2240 | 3.12 | 3.31 | 10.76 | 3.553 | 2.194 | tr H0VPG0 H0VPG0_CAVPO | Uncharacterized protein (Fragment) OS=Cavia porcellus GN=C16orf62 PE=4 SV=1         | CAVPO | 2  |
| 2241 | 3.12 | 3.19 | 13.37 | 13.37 | 13.37 | tr H0WBL0 H0WBL0_CAVPO | Uncharacterized protein (Fragment) OS=Cavia porcellus GN=DUSP3 PE=4 SV=1            | CAVPO | 2  |
| 2242 | 3.09 | 3.24 | 21.82 | 11.6  | 1.796 | tr H0V6A2 H0V6A2_CAVPO | Oxysterol-binding protein (Fragment) OS=Cavia porcellus GN=OSBP PE=3 SV=1           | CAVPO | 1  |
| 2243 | 3.09 | 3.18 | 16.7  | 7.675 | 5.643 | tr H0VDD4 H0VDD4_CAVPO | Uncharacterized protein OS=Cavia porcellus GN=TBL2 PE=4 SV=1                        | CAVPO | 2  |
| 2244 | 3.09 | 20.1 | 47.8  | 39.02 | 39.02 | tr H0W8M5 H0W8M5_CAVPO | Uncharacterized protein (Fragment) OS=Cavia porcellus PE=4 SV=1                     | CAVPO | 19 |
| 2245 | 3.08 | 3.25 | 50    | 32.86 | 18.57 | tr H0VDL2 H0VDL2_CAVPO | Uncharacterized protein (Fragment) OS=Cavia porcellus GN=RPL38 PE=3 SV=1            | CAVPO | 2  |

|      |      |      |       |       |       |                        |                                                                                |       |   |
|------|------|------|-------|-------|-------|------------------------|--------------------------------------------------------------------------------|-------|---|
| 2246 | 3.08 | 3.18 | 9.79  | 7.459 | 3.963 | tr H0VEI2 H0VEI2_CAVPO | Uncharacterized protein OS=Cavia porcellus<br>GN=POFUT2 PE=4 SV=1              | CAVPO | 2 |
| 2247 | 3.08 | 3.25 | 13.47 | 8.367 | 4.898 | tr H0VQ38 H0VQ38_CAVPO | Uncharacterized protein (Fragment) OS=Cavia<br>porcellus GN=ZC3HC1 PE=4 SV=1   | CAVPO | 2 |
| 2248 | 3.08 | 3.15 | 4.773 | 4.773 | 4.773 | tr H0VT01 H0VT01_CAVPO | Uncharacterized protein (Fragment) OS=Cavia<br>porcellus GN=FNTB PE=4 SV=1     | CAVPO | 2 |
| 2249 | 3.08 | 3.14 | 6.931 | 6.931 | 6.931 | tr H0W301 H0W301_CAVPO | Queuine tRNA-ribosyltransferase OS=Cavia<br>porcellus GN=QTRT1 PE=3 SV=1       | CAVPO | 2 |
| 2250 | 3.07 | 3.22 | 19.11 | 9.333 | 9.333 | tr H0VWZ9 H0VWZ9_CAVPO | Uncharacterized protein OS=Cavia porcellus<br>GN=PSPH PE=4 SV=1                | CAVPO | 2 |
| 2251 | 3.07 | 3.17 | 11.25 | 4.861 | 2.917 | tr H0W9S8 H0W9S8_CAVPO | Uncharacterized protein (Fragment) OS=Cavia<br>porcellus GN=EXOC8 PE=4 SV=1    | CAVPO | 2 |
| 2252 | 3.06 | 3.29 | 29.51 | 24.31 | 19.79 | tr H0V0R5 H0V0R5_CAVPO | Uncharacterized protein OS=Cavia porcellus<br>GN=STX1A PE=3 SV=1               | CAVPO | 4 |
| 2253 | 3.06 | 3.19 | 16.41 | 12.83 | 3.448 | tr H0VHW2 H0VHW2_CAVPO | Uncharacterized protein OS=Cavia porcellus<br>GN=MCCC1 PE=3 SV=1               | CAVPO | 2 |
| 2254 | 3.05 | 3.15 | 3.129 | 3.129 | 3.129 | tr H0V1N6 H0V1N6_CAVPO | Uncharacterized protein OS=Cavia porcellus<br>GN=EPB41L5 PE=4 SV=1             | CAVPO | 2 |
| 2255 | 3.05 | 3.26 | 8.915 | 7.132 | 4.309 | tr H0VBK4 H0VBK4_CAVPO | Uncharacterized protein OS=Cavia porcellus<br>GN=ARMC8 PE=4 SV=1               | CAVPO | 3 |
| 2256 | 3.04 | 3.17 | 31.73 | 14.42 | 7.692 | tr H0V2M8 H0V2M8_CAVPO | Uncharacterized protein (Fragment) OS=Cavia<br>porcellus GN=GAR1 PE=4 SV=1     | CAVPO | 2 |
| 2257 | 3.04 | 3.15 | 10.14 | 7.134 | 2.879 | tr H0VTP2 H0VTP2_CAVPO | Uncharacterized protein OS=Cavia porcellus<br>GN=STRN3 PE=4 SV=1               | CAVPO | 2 |
| 2258 | 3.03 | 3.1  | 40.91 | 40.91 | 40.91 | tr H0UT88 H0UT88_CAVPO | Uncharacterized protein (Fragment) OS=Cavia<br>porcellus GN=EIF4EBP2 PE=4 SV=1 | CAVPO | 2 |
| 2259 | 3.03 | 3.13 | 8.686 | 5.345 | 5.345 | tr H0VEK1 H0VEK1_CAVPO | Uncharacterized protein OS=Cavia porcellus<br>GN=NT5DC1 PE=4 SV=1              | CAVPO | 2 |

|      |      |      |       |       |       |                        |                                                                           |       |   |
|------|------|------|-------|-------|-------|------------------------|---------------------------------------------------------------------------|-------|---|
| 2260 | 3.03 | 5.25 | 43.81 | 20.95 | 16.67 | tr H0W717 H0W717_CAVPO | Uncharacterized protein (Fragment) OS=Cavia porcellus GN=RAB12 PE=3 SV=1  | CAVPO | 5 |
| 2261 | 3.03 | 7.34 | 35.02 | 29.95 | 29.95 | tr H0W7H0 H0W7H0_CAVPO | Uncharacterized protein (Fragment) OS=Cavia porcellus GN=TAGLN2 PE=4 SV=1 | CAVPO | 6 |
| 2262 | 3.03 | 9.72 | 41.08 | 41.08 | 34.05 | tr H0WCU1 H0WCU1_CAVPO | Uncharacterized protein OS=Cavia porcellus GN=RAP1A PE=4 SV=1             | CAVPO | 6 |
| 2263 | 3.02 | 3.11 | 17.53 | 13.51 | 7.471 | tr H0V5E2 H0V5E2_CAVPO | Uncharacterized protein OS=Cavia porcellus GN=LMAN2L PE=4 SV=1            | CAVPO | 2 |
| 2264 | 3.02 | 3.28 | 10.73 | 3.663 | 3.066 | tr H0VK30 H0VK30_CAVPO | Uncharacterized protein OS=Cavia porcellus GN=PLEKHA6 PE=4 SV=1           | CAVPO | 3 |
| 2265 | 3.02 | 3.09 | 10.9  | 4.135 | 4.135 | tr H0VP88 H0VP88_CAVPO | Uncharacterized protein OS=Cavia porcellus GN=ADCK4 PE=4 SV=1             | CAVPO | 2 |
| 2266 | 3.02 | 3.34 | 15.44 | 11.62 | 4.434 | tr H0VY4 H0VY4_CAVPO   | Uncharacterized protein OS=Cavia porcellus GN=ACADVL PE=3 SV=1            | CAVPO | 3 |
| 2267 | 3.01 | 3.18 | 15.32 | 10.28 | 5.47  | tr H0UYT8 H0UYT8_CAVPO | Annexin OS=Cavia porcellus GN=ANXA7 PE=3 SV=1                             | CAVPO | 2 |
| 2268 | 3.01 | 3.08 | 19.32 | 15.34 | 15.34 | tr H0V0H7 H0V0H7_CAVPO | Uncharacterized protein OS=Cavia porcellus GN=DR1 PE=4 SV=1               | CAVPO | 2 |
| 2269 | 3.01 | 3.17 | 7.063 | 2.194 | 1.231 | tr H0VA03 H0VA03_CAVPO | Uncharacterized protein (Fragment) OS=Cavia porcellus GN=ANK1 PE=4 SV=1   | CAVPO | 2 |
| 2270 | 3.01 | 3.12 | 21.59 | 13.64 | 9.091 | tr H0VLN6 H0VLN6_CAVPO | Uncharacterized protein OS=Cavia porcellus GN=VPS25 PE=4 SV=1             | CAVPO | 2 |
| 2271 | 3    | 3.14 | 14.97 | 14.97 | 14.97 | tr H0V6L9 H0V6L9_CAVPO | Uncharacterized protein OS=Cavia porcellus GN=TMEM35 PE=4 SV=1            | CAVPO | 2 |
| 2272 | 3    | 3.19 | 6.026 | 6.026 | 6.026 | tr H0VWW3 H0VWW3_CAVPO | Uncharacterized protein OS=Cavia porcellus GN=RIC8A PE=4 SV=1             | CAVPO | 3 |
| 2273 | 3    | 3.26 | 19.11 | 19.11 | 13.38 | tr H0VZ88 H0VZ88_CAVPO | Uncharacterized protein (Fragment) OS=Cavia porcellus GN=Rpl24 PE=4 SV=1  | CAVPO | 2 |

|      |      |      |       |       |       |                        |                                                                              |       |    |
|------|------|------|-------|-------|-------|------------------------|------------------------------------------------------------------------------|-------|----|
| 2274 | 2.99 | 3.05 | 23.73 | 23.73 | 23.73 | tr H0VI03 H0VI03_CAVPO | Uncharacterized protein OS=Cavia porcellus<br>GN=FAM103A1 PE=4 SV=1          | CAVPO | 2  |
| 2275 | 2.99 | 3.13 | 37.32 | 27.54 | 8.696 | tr H0VJ55 H0VJ55_CAVPO | Uncharacterized protein OS=Cavia porcellus<br>GN=FAM151B PE=4 SV=1           | CAVPO | 2  |
| 2276 | 2.99 | 3.05 | 18.68 | 12.45 | 12.45 | tr H0W2N0 H0W2N0_CAVPO | Uncharacterized protein (Fragment) OS=Cavia<br>porcellus PE=4 SV=1           | CAVPO | 2  |
| 2277 | 2.98 | 3.15 | 9.235 | 5.277 | 5.277 | tr H0VMQ8 H0VMQ8_CAVPO | Uncharacterized protein (Fragment) OS=Cavia<br>porcellus GN=LAMP2 PE=4 SV=1  | CAVPO | 2  |
| 2278 | 2.98 | 3.07 | 25.42 | 22.74 | 12.71 | tr H0VS52 H0VS52_CAVPO | Uncharacterized protein OS=Cavia porcellus<br>GN=PEX19 PE=4 SV=1             | CAVPO | 2  |
| 2279 | 2.97 | 3.21 | 10.46 | 10.09 | 9.174 | tr H0V2E2 H0V2E2_CAVPO | Uncharacterized protein OS=Cavia porcellus<br>GN=DCAF11 PE=4 SV=1            | CAVPO | 3  |
| 2280 | 2.97 | 3.3  | 45    | 25.62 | 18.13 | tr H0W4Y5 H0W4Y5_CAVPO | Uncharacterized protein (Fragment) OS=Cavia<br>porcellus GN=EFHD2 PE=4 SV=1  | CAVPO | 3  |
| 2281 | 2.97 | 3.05 | 14    | 9.949 | 7.42  | tr H0WCG0 H0WCG0_CAVPO | Uncharacterized protein OS=Cavia porcellus<br>GN=Bbs1 PE=4 SV=1              | CAVPO | 2  |
| 2282 | 2.96 | 3.07 | 8.04  | 8.04  | 6.533 | tr H0UT90 H0UT90_CAVPO | Uncharacterized protein (Fragment) OS=Cavia<br>porcellus GN=ATG4B PE=4 SV=1  | CAVPO | 2  |
| 2283 | 2.95 | 17.9 | 43.87 | 41.6  | 35.33 | tr H0VF74 H0VF74_CAVPO | Uncharacterized protein (Fragment) OS=Cavia<br>porcellus GN=PRKACB PE=4 SV=1 | CAVPO | 10 |
| 2284 | 2.95 | 5.52 | 20.65 | 14.72 | 6.135 | tr H0VGQ5 H0VGQ5_CAVPO | Uncharacterized protein OS=Cavia porcellus<br>GN=Cdk9 PE=4 SV=1              | CAVPO | 3  |
| 2285 | 2.93 | 3.12 | 10.21 | 8.314 | 5.701 | tr H0UU62 H0UU62_CAVPO | Uncharacterized protein (Fragment) OS=Cavia<br>porcellus GN=GLA PE=4 SV=1    | CAVPO | 2  |
| 2286 | 2.93 | 3    | 17.54 | 11.4  | 11.4  | tr H0UWC8 H0UWC8_CAVPO | Ribulose-phosphate 3-epimerase OS=Cavia<br>porcellus GN=Rpe PE=3 SV=1        | CAVPO | 2  |
| 2287 | 2.93 | 3.19 | 9.012 | 6.914 | 2.716 | tr H0UYK3 H0UYK3_CAVPO | Uncharacterized protein (Fragment) OS=Cavia<br>porcellus GN=TTC7B PE=4 SV=1  | CAVPO | 2  |

|      |      |      |       |       |       |                        |                                                                               |       |   |
|------|------|------|-------|-------|-------|------------------------|-------------------------------------------------------------------------------|-------|---|
| 2288 | 2.93 | 3.17 | 20.08 | 13.12 | 4.573 | tr H0V027 H0V027_CAVPO | Uncharacterized protein OS=Cavia porcellus<br>GN=PDHX PE=3 SV=1               | CAVPO | 2 |
| 2289 | 2.93 | 3.1  | 37.74 | 36.79 | 17.92 | tr H0V0C5 H0V0C5_CAVPO | Uncharacterized protein OS=Cavia porcellus<br>GN=NDUFS5 PE=4 SV=1             | CAVPO | 3 |
| 2290 | 2.93 | 3.08 | 9.111 | 7.158 | 5.64  | tr H0V1Y3 H0V1Y3_CAVPO | Coronin OS=Cavia porcellus GN=CORO1A<br>PE=3 SV=1                             | CAVPO | 2 |
| 2291 | 2.93 | 3.03 | 10.25 | 5.95  | 4.793 | tr H0VHH3 H0VHH3_CAVPO | Uncharacterized protein OS=Cavia porcellus<br>GN=SH3BP1 PE=4 SV=1             | CAVPO | 2 |
| 2292 | 2.93 | 3.26 | 27.66 | 24.62 | 9.898 | tr H0WD57 H0WD57_CAVPO | Uncharacterized protein OS=Cavia porcellus<br>GN=ALKBH5 PE=4 SV=1             | CAVPO | 2 |
| 2293 | 2.91 | 2.99 | 6.861 | 2.922 | 2.922 | tr H0V1H4 H0V1H4_CAVPO | Uncharacterized protein (Fragment) OS=Cavia<br>porcellus GN=PDXDC1 PE=3 SV=1  | CAVPO | 2 |
| 2294 | 2.91 | 3.01 | 11.58 | 11.38 | 4.391 | tr H0VB66 H0VB66_CAVPO | Uncharacterized protein OS=Cavia porcellus<br>GN=TFCP2 PE=4 SV=1              | CAVPO | 2 |
| 2295 | 2.9  | 7.91 | 25.5  | 25.5  | 11.26 | tr H0V9Y2 H0V9Y2_CAVPO | Peptidyl-prolyl cis-trans isomerase E<br>OS=Cavia porcellus GN=PPIE PE=3 SV=1 | CAVPO | 8 |
| 2296 | 2.9  | 2.98 | 25.27 | 19.23 | 15.38 | tr Q920K4 Q920K4_CAVPO | Ferritin OS=Cavia porcellus GN=Fth1 PE=2<br>SV=1                              | CAVPO | 2 |
| 2297 | 2.89 | 2.96 | 12.4  | 9.69  | 9.69  | tr H0UW36 H0UW36_CAVPO | Uncharacterized protein OS=Cavia porcellus<br>GN=Fam192a PE=4 SV=1            | CAVPO | 2 |
| 2298 | 2.89 | 2.99 | 32.69 | 16.67 | 11.54 | tr H0UZT4 H0UZT4_CAVPO | Uncharacterized protein OS=Cavia porcellus<br>GN=NCBP2 PE=4 SV=1              | CAVPO | 2 |
| 2299 | 2.89 | 3.07 | 11.15 | 3.925 | 3.925 | tr H0VSA3 H0VSA3_CAVPO | Uncharacterized protein OS=Cavia porcellus<br>GN=SRPR PE=4 SV=1               | CAVPO | 2 |
| 2300 | 2.88 | 2.94 | 19.19 | 13.8  | 13.8  | tr H0UUH5 H0UUH5_CAVPO | Uncharacterized protein OS=Cavia porcellus<br>GN=CFDP1 PE=4 SV=1              | CAVPO | 3 |
| 2301 | 2.88 | 3.07 | 19.62 | 12.1  | 2.688 | tr H0V2X4 H0V2X4_CAVPO | Uncharacterized protein OS=Cavia porcellus<br>GN=CDC73 PE=4 SV=1              | CAVPO | 1 |

|      |      |      |       |       |        |                        |                                                                             |       |   |
|------|------|------|-------|-------|--------|------------------------|-----------------------------------------------------------------------------|-------|---|
| 2302 | 2.88 | 3.08 | 24.03 | 24.03 | 24.03  | tr H0V899 H0V899_CAVPO | Uncharacterized protein (Fragment) OS=Cavia porcellus GN=CHCHD4 PE=4 SV=1   | CAVPO | 3 |
| 2303 | 2.88 | 3.04 | 10.15 | 2.977 | 2.977  | tr H0VUW1 H0VUW1_CAVPO | Uncharacterized protein (Fragment) OS=Cavia porcellus GN=KIF3B PE=4 SV=1    | CAVPO | 2 |
| 2304 | 2.87 | 3.49 | 12.08 | 8.679 | 6.604  | tr H0VHJ3 H0VHJ3_CAVPO | Uncharacterized protein (Fragment) OS=Cavia porcellus GN=HEXA PE=4 SV=1     | CAVPO | 3 |
| 2305 | 2.87 | 3.01 | 14.29 | 9.524 | 9.524  | tr H0VKW1 H0VKW1_CAVPO | Uncharacterized protein (Fragment) OS=Cavia porcellus GN=TMED5 PE=3 SV=1    | CAVPO | 3 |
| 2306 | 2.87 | 3.15 | 26.13 | 21.62 | 14.86  | tr H0W786 H0W786_CAVPO | Uncharacterized protein OS=Cavia porcellus GN=CHMP2A PE=4 SV=1              | CAVPO | 3 |
| 2307 | 2.86 | 2.95 | 10.38 | 7.186 | 3.194  | tr H0V9Q3 H0V9Q3_CAVPO | Uncharacterized protein (Fragment) OS=Cavia porcellus GN=CDK5RAP3 PE=4 SV=1 | CAVPO | 2 |
| 2308 | 2.86 | 3.03 | 27.76 | 25.08 | 10.37  | tr H0VSL6 H0VSL6_CAVPO | Uncharacterized protein OS=Cavia porcellus GN=Rqcd1 PE=4 SV=1               | CAVPO | 2 |
| 2309 | 2.86 | 3.11 | 28.93 | 15.98 | 7.713  | tr H0WA77 H0WA77_CAVPO | Uncharacterized protein OS=Cavia porcellus GN=KIAA1045 PE=4 SV=1            | CAVPO | 2 |
| 2310 | 2.85 | 2.98 | 9.034 | 5.919 | 5.919  | tr H0VBJ7 H0VBJ7_CAVPO | Uncharacterized protein OS=Cavia porcellus GN=CD47 PE=4 SV=1                | CAVPO | 2 |
| 2311 | 2.85 | 3.04 | 11.64 | 6.119 | 4.478  | tr H0VIT3 H0VIT3_CAVPO | Uncharacterized protein (Fragment) OS=Cavia porcellus GN=PCCA PE=3 SV=1     | CAVPO | 2 |
| 2312 | 2.84 | 2.99 | 23.24 | 23.24 | 23.24  | tr H0VRI3 H0VRI3_CAVPO | Uncharacterized protein OS=Cavia porcellus GN=VAMP4 PE=4 SV=1               | CAVPO | 2 |
| 2313 | 2.84 | 2.95 | 12.21 | 4.469 | 0.993  | tr H0VT70 H0VT70_CAVPO | Uncharacterized protein (Fragment) OS=Cavia porcellus GN=ITGAV PE=3 SV=1    | CAVPO | 1 |
| 2314 | 2.83 | 2.92 | 5.351 | 2.085 | 0.7644 | tr H0V2T4 H0V2T4_CAVPO | Uncharacterized protein OS=Cavia porcellus GN=GAPVD1 PE=4 SV=1              | CAVPO | 1 |
| 2315 | 2.82 | 2.88 | 30.43 | 30.43 | 30.43  | tr H0W364 H0W364_CAVPO | Uncharacterized protein OS=Cavia porcellus GN=RPS28 PE=3 SV=1               | CAVPO | 2 |



|      |      |      |       |       |       |                        |                                                                            |       |   |
|------|------|------|-------|-------|-------|------------------------|----------------------------------------------------------------------------|-------|---|
| 2316 | 2.82 | 5.45 | 15.09 | 9.434 | 6.761 | tr H0W486 H0W486_CAVPO | Uncharacterized protein (Fragment) OS=Cavia porcellus GN=CNGA3 PE=4 SV=1   | CAVPO | 4 |
| 2317 | 2.82 | 2.92 | 17.72 | 12.86 | 3.883 | tr H0W8E5 H0W8E5_CAVPO | Uncharacterized protein OS=Cavia porcellus GN=FKBP8 PE=4 SV=1              | CAVPO | 1 |
| 2318 | 2.81 | 2.87 | 7.767 | 7.767 | 7.767 | tr H0W889 H0W889_CAVPO | Uncharacterized protein (Fragment) OS=Cavia porcellus GN=ZADH2 PE=4 SV=1   | CAVPO | 2 |
| 2319 | 2.81 | 2.88 | 42.86 | 41.07 | 17.86 | tr H0W9V1 H0W9V1_CAVPO | 60S ribosomal protein L27 (Fragment) OS=Cavia porcellus GN=RPL27 PE=3 SV=1 | CAVPO | 2 |
| 2320 | 2.8  | 2.94 | 7.769 | 7.769 | 7.769 | tr H0V0G2 H0V0G2_CAVPO | Uncharacterized protein (Fragment) OS=Cavia porcellus GN=POFUT1 PE=4 SV=1  | CAVPO | 3 |
| 2321 | 2.8  | 3.05 | 17.11 | 8.48  | 3.509 | tr H0VIV6 H0VIV6_CAVPO | Uncharacterized protein OS=Cavia porcellus GN=CPSF3 PE=4 SV=1              | CAVPO | 2 |
| 2322 | 2.8  | 4.83 | 5.019 | 3.726 | 2.51  | tr H0VN26 H0VN26_CAVPO | Uncharacterized protein OS=Cavia porcellus GN=GAK PE=4 SV=1                | CAVPO | 3 |
| 2323 | 2.8  | 3.01 | 7.224 | 5.524 | 4.108 | tr H0VT85 H0VT85_CAVPO | Uncharacterized protein (Fragment) OS=Cavia porcellus GN=PRMT7 PE=4 SV=1   | CAVPO | 3 |
| 2324 | 2.79 | 2.94 | 15.73 | 9.363 | 9.363 | tr H0V732 H0V732_CAVPO | Hydroxypyruvate isomerase OS=Cavia porcellus GN=HYI PE=3 SV=1              | CAVPO | 2 |
| 2325 | 2.79 | 3    | 9.872 | 5.641 | 5.641 | tr H0VKU6 H0VKU6_CAVPO | Uncharacterized protein OS=Cavia porcellus GN=STRN PE=4 SV=1               | CAVPO | 3 |
| 2326 | 2.79 | 2.88 | 32.1  | 23.46 | 15.43 | tr H0W8L3 H0W8L3_CAVPO | Uncharacterized protein OS=Cavia porcellus GN=Btf3 PE=4 SV=1               | CAVPO | 1 |
| 2327 | 2.78 | 2.84 | 10.45 | 7.666 | 7.666 | tr H0V2G2 H0V2G2_CAVPO | Uncharacterized protein (Fragment) OS=Cavia porcellus GN=TTC1 PE=4 SV=1    | CAVPO | 2 |
| 2328 | 2.78 | 2.96 | 5.443 | 2.582 | 1.954 | tr H0VK33 H0VK33_CAVPO | Uncharacterized protein (Fragment) OS=Cavia porcellus GN=BAZ1B PE=4 SV=1   | CAVPO | 2 |
| 2329 | 2.77 | 2.95 | 11.9  | 9.762 | 9.762 | tr H0VDC7 H0VDC7_CAVPO | Uncharacterized protein OS=Cavia porcellus GN=ACAA1 PE=3 SV=1              | CAVPO | 3 |

|      |      |      |       |       |       |                        |                                                                             |       |   |
|------|------|------|-------|-------|-------|------------------------|-----------------------------------------------------------------------------|-------|---|
| 2330 | 2.77 | 2.92 | 13.12 | 6.807 | 3.837 | tr H0VLE5 H0VLE5_CAVPO | Uncharacterized protein OS=Cavia porcellus<br>GN=Zc3h11a PE=4 SV=1          | CAVPO | 2 |
| 2331 | 2.76 | 2.89 | 7.692 | 7.692 | 7.692 | tr H0V487 H0V487_CAVPO | Uncharacterized protein OS=Cavia porcellus<br>GN=MPDU1 PE=4 SV=1            | CAVPO | 2 |
| 2332 | 2.76 | 2.99 | 7.174 | 2.343 | 1.098 | tr H0VKL2 H0VKL2_CAVPO | Uncharacterized protein OS=Cavia porcellus<br>GN=TNIK PE=4 SV=1             | CAVPO | 2 |
| 2333 | 2.75 | 2.81 | 12.02 | 7.625 | 7.625 | tr H0VA66 H0VA66_CAVPO | Uncharacterized protein OS=Cavia porcellus<br>GN=DHRS13 PE=4 SV=1           | CAVPO | 2 |
| 2334 | 2.75 | 2.89 | 12.13 | 8.787 | 8.787 | tr H0VRT5 H0VRT5_CAVPO | Uncharacterized protein OS=Cavia porcellus<br>GN=PSME2 PE=4 SV=1            | CAVPO | 2 |
| 2335 | 2.75 | 2.81 | 4.038 | 4.038 | 4.038 | tr H0VUG3 H0VUG3_CAVPO | Uncharacterized protein OS=Cavia porcellus<br>GN=DYNC1I1 PE=4 SV=1          | CAVPO | 2 |
| 2336 | 2.74 | 2.9  | 13.85 | 6.24  | 2.892 | tr H0UV41 H0UV41_CAVPO | Uncharacterized protein OS=Cavia porcellus<br>GN=THOC1 PE=4 SV=1            | CAVPO | 2 |
| 2337 | 2.74 | 2.81 | 6.366 | 6.366 | 4.107 | tr H0UXZ3 H0UXZ3_CAVPO | Uncharacterized protein (Fragment) OS=Cavia<br>porcellus GN=GDA PE=4 SV=1   | CAVPO | 2 |
| 2338 | 2.74 | 2.8  | 6.785 | 6.785 | 6.785 | tr H0UZ87 H0UZ87_CAVPO | Uncharacterized protein OS=Cavia porcellus<br>GN=CLYBL PE=4 SV=1            | CAVPO | 2 |
| 2339 | 2.74 | 3.11 | 25.85 | 22.93 | 8.293 | tr H0VN30 H0VN30_CAVPO | Uncharacterized protein (Fragment) OS=Cavia<br>porcellus GN=HDDC2 PE=4 SV=1 | CAVPO | 1 |
| 2340 | 2.73 | 2.95 | 16.72 | 11.67 | 6.309 | tr H0UZS3 H0UZS3_CAVPO | Uncharacterized protein OS=Cavia porcellus<br>GN=PRKAG1 PE=4 SV=1           | CAVPO | 2 |
| 2341 | 2.73 | 2.81 | 40.71 | 30    | 30    | tr H0V5R4 H0V5R4_CAVPO | Uncharacterized protein OS=Cavia porcellus<br>GN=PTRHD1 PE=4 SV=1           | CAVPO | 2 |
| 2342 | 2.73 | 3.11 | 13.61 | 11.91 | 5.671 | tr H0V6C3 H0V6C3_CAVPO | Uncharacterized protein (Fragment) OS=Cavia<br>porcellus GN=SNB1 PE=4 SV=1  | CAVPO | 3 |
| 2343 | 2.72 | 2.92 | 31.62 | 31.62 | 12.82 | tr H0VNL2 H0VNL2_CAVPO | Uncharacterized protein OS=Cavia porcellus<br>GN=GABARAPL2 PE=3 SV=1        | CAVPO | 2 |

|      |      |      |       |       |       |                        |                                                                             |       |   |
|------|------|------|-------|-------|-------|------------------------|-----------------------------------------------------------------------------|-------|---|
| 2344 | 2.72 | 2.97 | 6.855 | 4.637 | 4.637 | tr H0VNP5 H0VNP5_CAVPO | Uncharacterized protein OS=Cavia porcellus<br>GN=DLGAP4 PE=4 SV=1           | CAVPO | 4 |
| 2345 | 2.71 | 2.77 | 34.57 | 23.46 | 23.46 | tr H0V0R1 H0V0R1_CAVPO | Uncharacterized protein OS=Cavia porcellus<br>GN=ABRACL PE=4 SV=1           | CAVPO | 3 |
| 2346 | 2.71 | 2.87 | 19.79 | 10.93 | 4.33  | tr H0V4N8 H0V4N8_CAVPO | Uncharacterized protein OS=Cavia porcellus<br>GN=WDR13 PE=4 SV=1            | CAVPO | 2 |
| 2347 | 2.71 | 2.85 | 12.97 | 9.73  | 9.73  | tr H0V6H0 H0V6H0_CAVPO | Uncharacterized protein OS=Cavia porcellus<br>GN=PTGES2 PE=3 SV=1           | CAVPO | 2 |
| 2348 | 2.71 | 2.77 | 47.87 | 39.36 | 31.91 | tr H0VZ22 H0VZ22_CAVPO | Uncharacterized protein (Fragment) OS=Cavia<br>porcellus GN=LSM2 PE=4 SV=1  | CAVPO | 2 |
| 2349 | 2.7  | 2.76 | 18.01 | 9.962 | 9.962 | tr H0UV59 H0UV59_CAVPO | Uncharacterized protein OS=Cavia porcellus<br>GN=C1orf35 PE=4 SV=1          | CAVPO | 2 |
| 2350 | 2.7  | 2.76 | 17.62 | 17.62 | 12.95 | tr H0V9I9 H0V9I9_CAVPO | Uncharacterized protein OS=Cavia porcellus<br>GN=AP3S1 PE=4 SV=1            | CAVPO | 2 |
| 2351 | 2.7  | 2.9  | 21.63 | 16.11 | 7.692 | tr H0VCL7 H0VCL7_CAVPO | Uncharacterized protein OS=Cavia porcellus<br>GN=ACTR10 PE=3 SV=1           | CAVPO | 2 |
| 2352 | 2.69 | 11.8 | 27.76 | 24.94 | 14.59 | tr H0VR65 H0VR65_CAVPO | Uncharacterized protein OS=Cavia porcellus<br>GN=RBBP7 PE=4 SV=1            | CAVPO | 7 |
| 2353 | 2.68 | 2.73 | 8.911 | 8.911 | 8.911 | tr H0W8X0 H0W8X0_CAVPO | Uncharacterized protein OS=Cavia porcellus<br>GN=RNFI26 PE=4 SV=1           | CAVPO | 2 |
| 2354 | 2.67 | 2.82 | 5.689 | 5.689 | 5.689 | tr H0VFA2 H0VFA2_CAVPO | Uncharacterized protein OS=Cavia porcellus<br>GN=HSD17B7 PE=4 SV=1          | CAVPO | 2 |
| 2355 | 2.66 | 2.8  | 6.602 | 3.851 | 2.889 | tr H0UTD8 H0UTD8_CAVPO | Uncharacterized protein OS=Cavia porcellus<br>GN=GPD2 PE=3 SV=1             | CAVPO | 2 |
| 2356 | 2.66 | 4.46 | 22.38 | 13.81 | 8.84  | tr H0UZG7 H0UZG7_CAVPO | Uncharacterized protein (Fragment) OS=Cavia<br>porcellus GN=TMOD3 PE=4 SV=1 | CAVPO | 3 |
| 2357 | 2.66 | 2.84 | 5.371 | 2.16  | 1.401 | tr H0V1R3 H0V1R3_CAVPO | Uncharacterized protein OS=Cavia porcellus<br>GN=CDC42BPB PE=4 SV=1         | CAVPO | 2 |

|      |      |      |       |       |       |                        |                                                                                                                              |       |   |
|------|------|------|-------|-------|-------|------------------------|------------------------------------------------------------------------------------------------------------------------------|-------|---|
| 2358 | 2.66 | 5.08 | 23.78 | 17.59 | 14.98 | tr H0V212 H0V212_CAVPO | Serine/threonine-protein phosphatase<br>OS=Cavia porcellus GN=PPP4C PE=3 SV=1                                                | CAVPO | 3 |
| 2359 | 2.66 | 2.84 | 38.62 | 26.21 | 15.86 | tr H0W6X3 H0W6X3_CAVPO | Uncharacterized protein (Fragment) OS=Cavia<br>porcellus GN=Fam136a PE=4 SV=1                                                | CAVPO | 2 |
| 2360 | 2.66 | 2.71 | 25.35 | 25.35 | 25.35 | tr H0WAV0 H0WAV0_CAVPO | Protein kish (Fragment) OS=Cavia porcellus<br>GN=TMEM167A PE=3 SV=1                                                          | CAVPO | 2 |
| 2361 | 2.65 | 8.85 | 29.87 | 19.25 | 11.95 | tr H0UWX4 H0UWX4_CAVPO | Serine/threonine-protein phosphatase 2A 55<br>kDa regulatory subunit B (Fragment)<br>OS=Cavia porcellus GN=PPP2R2D PE=3 SV=1 | CAVPO | 5 |
| 2362 | 2.65 | 2.81 | 17.12 | 6.849 | 5.308 | tr H0V832 H0V832_CAVPO | Uncharacterized protein (Fragment) OS=Cavia<br>porcellus GN=EIF2A PE=4 SV=1                                                  | CAVPO | 2 |
| 2363 | 2.65 | 2.72 | 21.7  | 21.7  | 9.906 | tr H0WAW0 H0WAW0_CAVPO | Uncharacterized protein OS=Cavia porcellus<br>GN=DRAP1 PE=4 SV=1                                                             | CAVPO | 2 |
| 2364 | 2.64 | 2.83 | 10.28 | 3.72  | 2.626 | tr H0UV06 H0UV06_CAVPO | Anoctamin OS=Cavia porcellus GN=ANO2<br>PE=3 SV=1                                                                            | CAVPO | 2 |
| 2365 | 2.64 | 2.7  | 21.96 | 14.12 | 9.804 | tr H0VJG3 H0VJG3_CAVPO | Uncharacterized protein OS=Cavia porcellus<br>GN=STX6 PE=4 SV=1                                                              | CAVPO | 2 |
| 2366 | 2.63 | 2.74 | 8.68  | 5.257 | 1.711 | tr H0VDM9 H0VDM9_CAVPO | Uncharacterized protein (Fragment) OS=Cavia<br>porcellus GN=EFR3A PE=4 SV=1                                                  | CAVPO | 1 |
| 2367 | 2.63 | 2.76 | 28.87 | 19.59 | 19.59 | tr H0VKR6 H0VKR6_CAVPO | Uncharacterized protein (Fragment) OS=Cavia<br>porcellus GN=SUMO1 PE=4 SV=1                                                  | CAVPO | 2 |
| 2368 | 2.63 | 2.7  | 47.37 | 47.37 | 44.21 | tr H0VQ54 H0VQ54_CAVPO | Uncharacterized protein OS=Cavia porcellus<br>GN=Fxyd6 PE=4 SV=1                                                             | CAVPO | 2 |
| 2369 | 2.62 | 2.68 | 6.086 | 3.181 | 3.181 | tr H0VAY4 H0VAY4_CAVPO | Uncharacterized protein OS=Cavia porcellus<br>GN=PIK3R1 PE=4 SV=1                                                            | CAVPO | 2 |
| 2370 | 2.62 | 2.67 | 6.953 | 3.254 | 3.254 | tr H0VLA4 H0VLA4_CAVPO | Uncharacterized protein OS=Cavia porcellus<br>GN=PTCD3 PE=4 SV=1                                                             | CAVPO | 2 |
| 2371 | 2.62 | 2.67 | 31.11 | 22.22 | 22.22 | tr H0W599 H0W599_CAVPO | Uncharacterized protein OS=Cavia porcellus                                                                                   | CAVPO | 2 |

|      |      |      |       |       |       |                        |                                                                              |       |   |
|------|------|------|-------|-------|-------|------------------------|------------------------------------------------------------------------------|-------|---|
|      |      |      |       |       |       |                        | GN=TIMM10 PE=4 SV=1                                                          |       |   |
| 2372 | 2.62 | 2.71 | 4.808 | 3.486 | 2.524 | tr H0WBV5 H0WBV5_CAVPO | Uncharacterized protein OS=Cavia porcellus<br>GN=TMEM63B PE=4 SV=1           | CAVPO | 2 |
| 2373 | 2.61 | 2.74 | 6.376 | 3.326 | 2.98  | tr H0V776 H0V776_CAVPO | Uncharacterized protein (Fragment) OS=Cavia<br>porcellus GN=VPRBP PE=4 SV=1  | CAVPO | 2 |
| 2374 | 2.61 | 2.83 | 17.18 | 12.02 | 7.634 | tr H0V9U1 H0V9U1_CAVPO | Uncharacterized protein (Fragment) OS=Cavia<br>porcellus GN=WDR26 PE=4 SV=1  | CAVPO | 3 |
| 2375 | 2.6  | 2.65 | 19.3  | 9.81  | 9.81  | tr H0VCR4 H0VCR4_CAVPO | Uncharacterized protein (Fragment) OS=Cavia<br>porcellus GN=ABHD11 PE=4 SV=1 | CAVPO | 2 |
| 2376 | 2.6  | 5.03 | 21.96 | 21.96 | 18.04 | tr H0VQW3 H0VQW3_CAVPO | Uncharacterized protein OS=Cavia porcellus<br>GN=UNC119B PE=4 SV=1           | CAVPO | 3 |
| 2377 | 2.59 | 2.63 | 26.51 | 26.51 | 26.51 | tr H0VVE2 H0VVE2_CAVPO | Uncharacterized protein (Fragment) OS=Cavia<br>porcellus GN=NDUFB4 PE=4 SV=1 | CAVPO | 2 |
| 2378 | 2.58 | 2.63 | 6.43  | 5.322 | 1.441 | tr H0VBG8 H0VBG8_CAVPO | Uncharacterized protein OS=Cavia porcellus<br>GN=LARS2 PE=3 SV=1             | CAVPO | 1 |
| 2379 | 2.58 | 2.64 | 7.895 | 3.684 | 2.211 | tr H0VEJ7 H0VEJ7_CAVPO | Uncharacterized protein OS=Cavia porcellus<br>GN=XRN2 PE=4 SV=1              | CAVPO | 2 |
| 2380 | 2.58 | 2.73 | 9.066 | 9.066 | 6.319 | tr H0VHY0 H0VHY0_CAVPO | Uncharacterized protein (Fragment) OS=Cavia<br>porcellus GN=Atxn3 PE=4 SV=1  | CAVPO | 2 |
| 2381 | 2.58 | 2.63 | 7.216 | 4.742 | 4.742 | tr H0W1Q8 H0W1Q8_CAVPO | Uncharacterized protein (Fragment) OS=Cavia<br>porcellus GN=MTMR1 PE=4 SV=1  | CAVPO | 2 |
| 2382 | 2.58 | 2.7  | 5.321 | 3.274 | 3.274 | tr H0WB99 H0WB99_CAVPO | Uncharacterized protein OS=Cavia porcellus<br>GN=IRF2BPL PE=4 SV=1           | CAVPO | 2 |
| 2383 | 2.57 | 2.61 | 7.167 | 7.167 | 7.167 | tr H0V6E3 H0V6E3_CAVPO | Uncharacterized protein OS=Cavia porcellus<br>GN=MSMO1 PE=4 SV=1             | CAVPO | 2 |
| 2384 | 2.57 | 2.63 | 15.91 | 9.596 | 3.535 | tr H0VEX5 H0VEX5_CAVPO | Uncharacterized protein OS=Cavia porcellus<br>GN=CHID1 PE=3 SV=1             | CAVPO | 1 |

|      |      |      |       |       |        |                        |                                                                               |       |   |
|------|------|------|-------|-------|--------|------------------------|-------------------------------------------------------------------------------|-------|---|
| 2385 | 2.57 | 2.64 | 7.233 | 1.766 | 1.766  | tr H0VRG4 H0VRG4_CAVPO | Uncharacterized protein OS=Cavia porcellus<br>GN=DAB2IP PE=4 SV=1             | CAVPO | 2 |
| 2386 | 2.56 | 2.61 | 4.848 | 3.03  | 3.03   | tr H0V845 H0V845_CAVPO | Uncharacterized protein OS=Cavia porcellus<br>GN=SLC7A5 PE=4 SV=1             | CAVPO | 2 |
| 2387 | 2.56 | 2.62 | 25.48 | 22.12 | 22.12  | tr H0VCW8 H0VCW8_CAVPO | Uncharacterized protein OS=Cavia porcellus<br>GN=CRIP2 PE=4 SV=1              | CAVPO | 2 |
| 2388 | 2.55 | 2.65 | 6.217 | 1.421 | 0.8289 | tr H0UTK3 H0UTK3_CAVPO | Uncharacterized protein OS=Cavia porcellus<br>GN=PBRM1 PE=4 SV=1              | CAVPO | 1 |
| 2389 | 2.55 | 2.85 | 19.62 | 15.26 | 8.719  | tr H0VHP6 H0VHP6_CAVPO | Uncharacterized protein OS=Cavia porcellus<br>GN=DRG1 PE=4 SV=1               | CAVPO | 3 |
| 2390 | 2.55 | 2.61 | 13.05 | 9.071 | 4.425  | tr H0VVK3 H0VVK3_CAVPO | Uncharacterized protein (Fragment) OS=Cavia<br>porcellus GN=PPM1F PE=3 SV=1   | CAVPO | 1 |
| 2391 | 2.54 | 2.61 | 18    | 16.29 | 10.29  | tr H0UUM8 H0UUM8_CAVPO | Uncharacterized protein OS=Cavia porcellus<br>GN=ATP6AP2 PE=4 SV=1            | CAVPO | 3 |
| 2392 | 2.54 | 2.58 | 12.34 | 8.442 | 8.442  | tr H0VLX3 H0VLX3_CAVPO | Uncharacterized protein OS=Cavia porcellus<br>GN=SAP30BP PE=4 SV=1            | CAVPO | 2 |
| 2393 | 2.53 | 2.58 | 16.31 | 8.873 | 6.475  | tr H0W9H9 H0W9H9_CAVPO | Uncharacterized protein (Fragment) OS=Cavia<br>porcellus GN=ALDH5A1 PE=3 SV=1 | CAVPO | 2 |
| 2394 | 2.52 | 2.68 | 5.74  | 2.189 | 1.479  | tr H0UYC9 H0UYC9_CAVPO | Uncharacterized protein OS=Cavia porcellus<br>GN=KDM3B PE=4 SV=1              | CAVPO | 2 |
| 2395 | 2.52 | 2.6  | 21.4  | 18.6  | 6.512  | tr H0UYD1 H0UYD1_CAVPO | Uncharacterized protein OS=Cavia porcellus<br>GN=RPL10 PE=4 SV=1              | CAVPO | 2 |
| 2396 | 2.52 | 2.56 | 15.04 | 10.18 | 10.18  | tr H0W603 H0W603_CAVPO | Uncharacterized protein OS=Cavia porcellus<br>GN=OVCA2 PE=4 SV=1              | CAVPO | 2 |
| 2397 | 2.51 | 2.55 | 40    | 21.38 | 21.38  | tr H0V238 H0V238_CAVPO | Uncharacterized protein (Fragment) OS=Cavia<br>porcellus GN=Rps15 PE=3 SV=1   | CAVPO | 3 |
| 2398 | 2.51 | 2.58 | 19.65 | 10.95 | 3.234  | tr H0VIZ2 H0VIZ2_CAVPO | Uncharacterized protein (Fragment) OS=Cavia<br>porcellus GN=CPOX PE=4 SV=1    | CAVPO | 1 |

|      |      |      |       |       |       |                        |                                                                              |       |   |
|------|------|------|-------|-------|-------|------------------------|------------------------------------------------------------------------------|-------|---|
| 2399 | 2.5  | 2.54 | 26.41 | 14.72 | 10.39 | tr H0UYT6 H0UYT6_CAVPO | Uncharacterized protein OS=Cavia porcellus<br>GN=STX7 PE=3 SV=1              | CAVPO | 2 |
| 2400 | 2.5  | 2.72 | 22.48 | 14.52 | 5.621 | tr H0VKN1 H0VKN1_CAVPO | Uncharacterized protein OS=Cavia porcellus<br>GN=FLOT1 PE=4 SV=1             | CAVPO | 2 |
| 2401 | 2.5  | 2.62 | 3.374 | 1.018 | 1.018 | tr H0VQ95 H0VQ95_CAVPO | Uncharacterized protein OS=Cavia porcellus<br>GN=SBF1 PE=4 SV=1              | CAVPO | 2 |
| 2402 | 2.49 | 2.59 | 12.31 | 10.21 | 10.21 | tr H0VE49 H0VE49_CAVPO | Uncharacterized protein OS=Cavia porcellus<br>GN=CTSV PE=3 SV=1              | CAVPO | 2 |
| 2403 | 2.49 | 2.53 | 15.58 | 7.609 | 4.71  | tr H0VN65 H0VN65_CAVPO | Uncharacterized protein OS=Cavia porcellus<br>GN=CCS PE=4 SV=1               | CAVPO | 1 |
| 2404 | 2.49 | 2.61 | 7.857 | 4.762 | 4.762 | tr H0W0K2 H0W0K2_CAVPO | Uncharacterized protein OS=Cavia porcellus<br>GN=NUCB2 PE=4 SV=1             | CAVPO | 2 |
| 2405 | 2.48 | 2.54 | 14.66 | 9.971 | 2.639 | tr H0V4D2 H0V4D2_CAVPO | Uncharacterized protein OS=Cavia porcellus<br>GN=Bbs5 PE=4 SV=1              | CAVPO | 1 |
| 2406 | 2.48 | 2.52 | 17.54 | 17.54 | 17.54 | tr H0VAS5 H0VAS5_CAVPO | Uncharacterized protein (Fragment) OS=Cavia<br>porcellus GN=COPZ1 PE=4 SV=1  | CAVPO | 2 |
| 2407 | 2.48 | 2.61 | 10.42 | 8.958 | 3.125 | tr H0VLA0 H0VLA0_CAVPO | Uncharacterized protein (Fragment) OS=Cavia<br>porcellus GN=RBM42 PE=4 SV=1  | CAVPO | 2 |
| 2408 | 2.48 | 2.52 | 8.056 | 7.778 | 7.778 | tr H0VPQ3 H0VPQ3_CAVPO | Uncharacterized protein (Fragment) OS=Cavia<br>porcellus GN=WBP4 PE=4 SV=1   | CAVPO | 2 |
| 2409 | 2.48 | 2.54 | 15.84 | 11.17 | 2.857 | tr H0VY96 H0VY96_CAVPO | Uncharacterized protein OS=Cavia porcellus<br>GN=PELO PE=4 SV=1              | CAVPO | 1 |
| 2410 | 2.47 | 2.63 | 11.92 | 7.277 | 3.137 | tr H0V676 H0V676_CAVPO | Uncharacterized protein OS=Cavia porcellus<br>GN=TRAPPC12 PE=4 SV=1          | CAVPO | 2 |
| 2411 | 2.47 | 2.52 | 9.063 | 4.455 | 1.382 | tr H0VFE9 H0VFE9_CAVPO | Uncharacterized protein (Fragment) OS=Cavia<br>porcellus GN=ADRBK2 PE=3 SV=1 | CAVPO | 1 |
| 2412 | 2.47 | 2.58 | 14.91 | 14.91 | 14.91 | tr H0WBW8 H0WBW8_CAVPO | Uncharacterized protein OS=Cavia porcellus<br>GN=LOC100726034 PE=4 SV=1      | CAVPO | 2 |

|      |      |      |       |       |        |                        |                                                                                              |       |   |
|------|------|------|-------|-------|--------|------------------------|----------------------------------------------------------------------------------------------|-------|---|
| 2413 | 2.46 | 2.88 | 9.829 | 7.479 | 4.487  | tr H0VJF1 H0VJF1_CAVPO | Uncharacterized protein OS=Cavia porcellus<br>GN=C16orf58 PE=4 SV=1                          | CAVPO | 2 |
| 2414 | 2.46 | 2.52 | 9.399 | 8.616 | 3.655  | tr H0VLL0 H0VLL0_CAVPO | Ubiquitin carboxyl-terminal hydrolase<br>(Fragment) OS=Cavia porcellus GN=USP10<br>PE=3 SV=1 | CAVPO | 2 |
| 2415 | 2.46 | 2.61 | 6.502 | 4.161 | 2.471  | tr H0VSL8 H0VSL8_CAVPO | Phosphoinositide phospholipase C (Fragment)<br>OS=Cavia porcellus GN=PLCD4 PE=4 SV=1         | CAVPO | 2 |
| 2416 | 2.45 | 2.58 | 35.63 | 29.89 | 18.97  | tr H0V9K8 H0V9K8_CAVPO | Uncharacterized protein OS=Cavia porcellus<br>GN=C20orf27 PE=4 SV=1                          | CAVPO | 2 |
| 2417 | 2.45 | 2.49 | 23.73 | 14.69 | 14.69  | tr H0VII1 H0VII1_CAVPO | Uncharacterized protein OS=Cavia porcellus<br>GN=H1F0 PE=3 SV=1                              | CAVPO | 3 |
| 2418 | 2.45 | 2.5  | 9.237 | 6.225 | 2.209  | tr H0VLS4 H0VLS4_CAVPO | Uncharacterized protein OS=Cavia porcellus<br>GN=TH PE=4 SV=1                                | CAVPO | 1 |
| 2419 | 2.45 | 2.52 | 7.419 | 5.806 | 2.473  | tr H0VZQ5 H0VZQ5_CAVPO | Uncharacterized protein (Fragment) OS=Cavia<br>porcellus GN=SCAF1 PE=4 SV=1                  | CAVPO | 2 |
| 2420 | 2.43 | 2.47 | 40    | 23.53 | 9.412  | tr H0UVF7 H0UVF7_CAVPO | Uncharacterized protein (Fragment) OS=Cavia<br>porcellus GN=RRAS2 PE=4 SV=1                  | CAVPO | 1 |
| 2421 | 2.43 | 2.48 | 31.2  | 24.8  | 18.4   | tr H0VWJ2 H0VWJ2_CAVPO | Uncharacterized protein OS=Cavia porcellus<br>GN=RPL31 PE=4 SV=1                             | CAVPO | 2 |
| 2422 | 2.42 | 2.68 | 8.195 | 3.424 | 0.9234 | tr H0V7Q2 H0V7Q2_CAVPO | Uncharacterized protein OS=Cavia porcellus<br>GN=GOLGB1 PE=4 SV=1                            | CAVPO | 2 |
| 2423 | 2.42 | 2.54 | 11.99 | 3.894 | 3.894  | tr H0VZ66 H0VZ66_CAVPO | Uncharacterized protein (Fragment) OS=Cavia<br>porcellus GN=RECQL PE=4 SV=1                  | CAVPO | 2 |
| 2424 | 2.41 | 2.89 | 28.66 | 15.31 | 12.7   | tr H0VGB4 H0VGB4_CAVPO | Uncharacterized protein OS=Cavia porcellus<br>GN=AKR1E2 PE=4 SV=1                            | CAVPO | 5 |
| 2425 | 2.41 | 2.45 | 57.14 | 26.79 | 26.79  | tr H0VVM0 H0VVM0_CAVPO | Uncharacterized protein OS=Cavia porcellus<br>GN=ARPP19 PE=4 SV=1                            | CAVPO | 2 |
| 2426 | 2.4  | 2.44 | 5.546 | 3.578 | 1.431  | tr H0V2D3 H0V2D3_CAVPO | Uncharacterized protein OS=Cavia porcellus                                                   | CAVPO | 1 |



|      |      |      |       |       |       |                        |                                                                              |       |   |
|------|------|------|-------|-------|-------|------------------------|------------------------------------------------------------------------------|-------|---|
|      |      |      |       |       |       |                        | GN=WASF1 PE=4 SV=1                                                           |       |   |
| 2427 | 2.4  | 2.51 | 8.556 | 8.556 | 8.556 | tr H0V2Z1 H0V2Z1_CAVPO | Uncharacterized protein OS=Cavia porcellus<br>GN=GPN1 PE=4 SV=1              | CAVPO | 2 |
| 2428 | 2.4  | 2.6  | 54.43 | 24.05 | 8.861 | tr H0VDD7 H0VDD7_CAVPO | Uncharacterized protein OS=Cavia porcellus<br>GN=TRAPPC6B PE=4 SV=1          | CAVPO | 1 |
| 2429 | 2.4  | 2.53 | 16.99 | 16.99 | 16.99 | tr H0VDV8 H0VDV8_CAVPO | Uncharacterized protein OS=Cavia porcellus<br>GN=ORMDL2 PE=4 SV=1            | CAVPO | 2 |
| 2430 | 2.4  | 2.54 | 10.46 | 6.971 | 3.351 | tr H0VS86 H0VS86_CAVPO | Uncharacterized protein OS=Cavia porcellus<br>GN=WDR91 PE=4 SV=1             | CAVPO | 2 |
| 2431 | 2.39 | 2.45 | 11.14 | 6.627 | 4.217 | tr H0V0L1 H0V0L1_CAVPO | Uncharacterized protein (Fragment) OS=Cavia<br>porcellus GN=PARVA PE=4 SV=1  | CAVPO | 1 |
| 2432 | 2.39 | 2.54 | 17.19 | 11.31 | 7.014 | tr H0V390 H0V390_CAVPO | Uncharacterized protein OS=Cavia porcellus<br>GN=Acot2 PE=4 SV=1             | CAVPO | 3 |
| 2433 | 2.39 | 2.45 | 6.438 | 1.793 | 0.978 | tr H0VW81 H0VW81_CAVPO | Uncharacterized protein (Fragment) OS=Cavia<br>porcellus GN=BCR PE=4 SV=1    | CAVPO | 1 |
| 2434 | 2.38 | 2.54 | 12.71 | 10.7  | 3.846 | tr H0UWD7 H0UWD7_CAVPO | Uncharacterized protein OS=Cavia porcellus<br>GN=NR2C2 PE=3 SV=1             | CAVPO | 2 |
| 2435 | 2.38 | 2.53 | 8.215 | 3.688 | 0.922 | tr H0VCM5 H0VCM5_CAVPO | Uncharacterized protein (Fragment) OS=Cavia<br>porcellus GN=CUX1 PE=4 SV=1   | CAVPO | 1 |
| 2436 | 2.38 | 2.44 | 21.1  | 13.99 | 6.193 | tr H0VDG8 H0VDG8_CAVPO | Uncharacterized protein (Fragment) OS=Cavia<br>porcellus GN=SREK1 PE=4 SV=1  | CAVPO | 2 |
| 2437 | 2.38 | 2.43 | 7.426 | 6.271 | 1.32  | tr H0VQE2 H0VQE2_CAVPO | Uncharacterized protein OS=Cavia porcellus<br>GN=GPR37 PE=4 SV=1             | CAVPO | 1 |
| 2438 | 2.38 | 2.46 | 19.85 | 15.46 | 3.866 | tr H0VSH9 H0VSH9_CAVPO | Uncharacterized protein (Fragment) OS=Cavia<br>porcellus GN=INPP5A PE=4 SV=1 | CAVPO | 1 |
| 2439 | 2.37 | 2.44 | 30.29 | 19.92 | 4.149 | tr H0V2J9 H0V2J9_CAVPO | Uncharacterized protein OS=Cavia porcellus<br>GN=EMC7 PE=4 SV=1              | CAVPO | 1 |

|      |      |      |       |       |       |                        |                                                                              |       |    |
|------|------|------|-------|-------|-------|------------------------|------------------------------------------------------------------------------|-------|----|
| 2440 | 2.37 | 2.41 | 13.17 | 9.16  | 4.58  | tr H0VPK5 H0VPK5_CAVPO | Uncharacterized protein (Fragment) OS=Cavia porcellus PE=4 SV=1              | CAVPO | 2  |
| 2441 | 2.36 | 6.12 | 25.25 | 25.25 | 19.7  | tr H0VRN5 H0VRN5_CAVPO | Uncharacterized protein OS=Cavia porcellus GN=SAR1B PE=3 SV=1                | CAVPO | 4  |
| 2442 | 2.36 | 2.49 | 27.35 | 21.37 | 21.37 | tr H0VWS5 H0VWS5_CAVPO | Transcription elongation factor SPT4 OS=Cavia porcellus GN=SUPT4H1 PE=3 SV=1 | CAVPO | 2  |
| 2443 | 2.36 | 2.4  | 47    | 18.5  | 8     | tr H0W240 H0W240_CAVPO | Uncharacterized protein OS=Cavia porcellus GN=NUDT16 PE=4 SV=1               | CAVPO | 1  |
| 2444 | 2.36 | 2.4  | 20.52 | 19.65 | 6.55  | tr H0W4Y6 H0W4Y6_CAVPO | Synaptogyrin OS=Cavia porcellus GN=SYNGR3 PE=3 SV=1                          | CAVPO | 1  |
| 2445 | 2.34 | 21.1 | 50    | 47.08 | 47.08 | tr H0V4U1 H0V4U1_CAVPO | Serine/threonine-protein phosphatase OS=Cavia porcellus GN=PPP2CB PE=3 SV=1  | CAVPO | 13 |
| 2446 | 2.34 | 2.66 | 14.08 | 8.169 | 3.662 | tr H0VA56 H0VA56_CAVPO | Uncharacterized protein (Fragment) OS=Cavia porcellus GN=HOMER1 PE=4 SV=1    | CAVPO | 1  |
| 2447 | 2.34 | 2.38 | 7.882 | 6.897 | 3.941 | tr H0VGH2 H0VGH2_CAVPO | Uncharacterized protein OS=Cavia porcellus GN=TAF15 PE=4 SV=1                | CAVPO | 2  |
| 2448 | 2.34 | 2.38 | 28.18 | 20.91 | 6.364 | tr H0VTD8 H0VTD8_CAVPO | Uncharacterized protein OS=Cavia porcellus GN=RPL35A PE=4 SV=1               | CAVPO | 1  |
| 2449 | 2.33 | 2.36 | 11.11 | 11.11 | 11.11 | tr H0V3P5 H0V3P5_CAVPO | Uncharacterized protein (Fragment) OS=Cavia porcellus GN=SNRPD1 PE=4 SV=1    | CAVPO | 1  |
| 2450 | 2.33 | 2.36 | 7.774 | 7.774 | 7.774 | tr H0V3W0 H0V3W0_CAVPO | Uncharacterized protein OS=Cavia porcellus GN=UBXN1 PE=4 SV=1                | CAVPO | 2  |
| 2451 | 2.33 | 2.36 | 12.08 | 9.434 | 6.038 | tr H0VZM9 H0VZM9_CAVPO | Uncharacterized protein OS=Cavia porcellus GN=AQP5 PE=3 SV=1                 | CAVPO | 1  |
| 2452 | 2.33 | 2.36 | 8.759 | 8.759 | 2.676 | tr H0WBR9 H0WBR9_CAVPO | Uncharacterized protein (Fragment) OS=Cavia porcellus GN=NAGA PE=4 SV=1      | CAVPO | 1  |
| 2453 | 2.32 | 2.36 | 38.85 | 19.42 | 9.353 | tr H0UZ92 H0UZ92_CAVPO | Uncharacterized protein (Fragment) OS=Cavia porcellus GN=TRAPPC2L PE=4 SV=1  | CAVPO | 1  |

|      |      |      |       |       |       |                        |                                                                            |       |   |
|------|------|------|-------|-------|-------|------------------------|----------------------------------------------------------------------------|-------|---|
| 2454 | 2.32 | 2.35 | 15.71 | 9.286 | 8.571 | tr H0UZP2 H0UZP2_CAVPO | Peptidyl-prolyl cis-trans isomerase OS=Cavia porcellus GN=FKBP2 PE=4 SV=1  | CAVPO | 1 |
| 2455 | 2.32 | 2.44 | 7.627 | 5.085 | 5.085 | tr H0VXH0 H0VXH0_CAVPO | Uncharacterized protein (Fragment) OS=Cavia porcellus GN=IRF2BP1 PE=4 SV=1 | CAVPO | 2 |
| 2456 | 2.32 | 2.39 | 9.704 | 3.618 | 2.138 | tr H0W8X9 H0W8X9_CAVPO | Uncharacterized protein OS=Cavia porcellus GN=EPM2AIP1 PE=4 SV=1           | CAVPO | 1 |
| 2457 | 2.31 | 2.44 | 18.64 | 10.08 | 10.08 | tr H0VJ98 H0VJ98_CAVPO | Uncharacterized protein OS=Cavia porcellus GN=VPS37A PE=4 SV=1             | CAVPO | 3 |
| 2458 | 2.31 | 2.43 | 4.501 | 3.001 | 2.207 | tr H0VJL4 H0VJL4_CAVPO | Uncharacterized protein OS=Cavia porcellus GN=TRAPPC11 PE=4 SV=1           | CAVPO | 2 |
| 2459 | 2.3  | 2.38 | 7.882 | 7.882 | 4.926 | tr H0VLT5 H0VLT5_CAVPO | Uncharacterized protein OS=Cavia porcellus GN=ARL6IP1 PE=4 SV=1            | CAVPO | 1 |
| 2460 | 2.29 | 5.8  | 8.569 | 4.409 | 3.161 | tr H0V5Q5 H0V5Q5_CAVPO | Uncharacterized protein OS=Cavia porcellus GN=PPFIA1 PE=4 SV=1             | CAVPO | 3 |
| 2461 | 2.29 | 2.63 | 6.81  | 3.853 | 2.151 | tr H0VCZ3 H0VCZ3_CAVPO | Uncharacterized protein OS=Cavia porcellus GN=ERC1 PE=4 SV=1               | CAVPO | 2 |
| 2462 | 2.29 | 2.41 | 2.957 | 1.163 | 1.163 | tr H0VDJ5 H0VDJ5_CAVPO | Uncharacterized protein OS=Cavia porcellus GN=MPDZ PE=4 SV=1               | CAVPO | 2 |
| 2463 | 2.29 | 2.32 | 12.93 | 5.122 | 3.171 | tr H0W5Z0 H0W5Z0_CAVPO | Uncharacterized protein OS=Cavia porcellus GN=AUP1 PE=4 SV=1               | CAVPO | 1 |
| 2464 | 2.28 | 2.44 | 13.81 | 9.524 | 4.524 | tr H0UX61 H0UX61_CAVPO | Uncharacterized protein (Fragment) OS=Cavia porcellus GN=HAT1 PE=4 SV=1    | CAVPO | 2 |
| 2465 | 2.28 | 2.46 | 18.45 | 11.26 | 4.854 | tr H0VII4 H0VII4_CAVPO | Uncharacterized protein (Fragment) OS=Cavia porcellus GN=GTF3C5 PE=4 SV=1  | CAVPO | 2 |
| 2466 | 2.28 | 2.32 | 24.18 | 18.95 | 7.19  | tr H0VUF9 H0VUF9_CAVPO | Uncharacterized protein OS=Cavia porcellus GN=CSDC2 PE=4 SV=1              | CAVPO | 1 |
| 2467 | 2.27 | 2.42 | 15.25 | 9.746 | 4.025 | tr H0VE54 H0VE54_CAVPO | Uncharacterized protein (Fragment) OS=Cavia porcellus GN=Nampt PE=4 SV=1   | CAVPO | 2 |

|      |      |      |       |       |       |                        |                                                                             |       |   |
|------|------|------|-------|-------|-------|------------------------|-----------------------------------------------------------------------------|-------|---|
| 2468 | 2.27 | 2.3  | 20.53 | 14.74 | 5.263 | tr H0VI91 H0VI91_CAVPO | Uncharacterized protein OS=Cavia porcellus<br>GN=DCTN6 PE=4 SV=1            | CAVPO | 1 |
| 2469 | 2.26 | 2.34 | 16.24 | 5.412 | 3.294 | tr H0UXR3 H0UXR3_CAVPO | Uncharacterized protein OS=Cavia porcellus<br>GN=AADAT PE=4 SV=1            | CAVPO | 1 |
| 2470 | 2.26 | 2.44 | 19.57 | 13.66 | 7.143 | tr H0VJY0 H0VJY0_CAVPO | Uncharacterized protein (Fragment) OS=Cavia<br>porcellus GN=RBBP5 PE=4 SV=1 | CAVPO | 2 |
| 2471 | 2.25 | 2.37 | 11.8  | 3.675 | 3.675 | tr H0UTF7 H0UTF7_CAVPO | Amidophosphoribosyltransferase OS=Cavia<br>porcellus GN=PPAT PE=3 SV=1      | CAVPO | 2 |
| 2472 | 2.25 | 2.38 | 8.511 | 3.319 | 2.213 | tr H0UTZ8 H0UTZ8_CAVPO | Phosphoinositide phospholipase C OS=Cavia<br>porcellus GN=PLCB4 PE=4 SV=1   | CAVPO | 2 |
| 2473 | 2.25 | 2.39 | 8.636 | 4.922 | 1.295 | tr H0VGV7 H0VGV7_CAVPO | Uncharacterized protein OS=Cavia porcellus<br>GN=TECPR1 PE=4 SV=1           | CAVPO | 1 |
| 2474 | 2.25 | 2.45 | 30.61 | 15.31 | 6.463 | tr H0VMN7 H0VMN7_CAVPO | Uncharacterized protein OS=Cavia porcellus<br>GN=C5orf51 PE=4 SV=1          | CAVPO | 2 |
| 2475 | 2.25 | 2.38 | 10.72 | 6.369 | 1.38  | tr H0VNK8 H0VNK8_CAVPO | Uncharacterized protein OS=Cavia porcellus<br>GN=ERAP1 PE=4 SV=1            | CAVPO | 1 |
| 2476 | 2.25 | 2.38 | 8.407 | 8.407 | 8.407 | tr Q9TEG6 Q9TEG6_CAVPO | ATP synthase subunit a OS=Cavia porcellus<br>GN=ATPase 6 PE=3 SV=1          | CAVPO | 2 |
| 2477 | 2.24 | 2.28 | 9.724 | 3.728 | 1.783 | tr H0V1I3 H0V1I3_CAVPO | Uncharacterized protein OS=Cavia porcellus<br>GN=VPS33B PE=4 SV=1           | CAVPO | 1 |
| 2478 | 2.24 | 2.37 | 7.143 | 7.143 | 4.898 | tr H0VBV6 H0VBV6_CAVPO | Uncharacterized protein OS=Cavia porcellus<br>GN=TOM1 PE=4 SV=1             | CAVPO | 2 |
| 2479 | 2.24 | 2.27 | 10.86 | 7.566 | 3.618 | tr H0VMA1 H0VMA1_CAVPO | Uncharacterized protein (Fragment) OS=Cavia<br>porcellus GN=ACOT8 PE=4 SV=1 | CAVPO | 1 |
| 2480 | 2.24 | 2.26 | 7.035 | 4.774 | 2.764 | tr H0VN40 H0VN40_CAVPO | Uncharacterized protein OS=Cavia porcellus<br>GN=C17orf75 PE=4 SV=1         | CAVPO | 1 |
| 2481 | 2.23 | 2.26 | 10.54 | 3.514 | 1.597 | tr H0UYA2 H0UYA2_CAVPO | Uncharacterized protein OS=Cavia porcellus<br>GN=PEX5L PE=4 SV=1            | CAVPO | 1 |

|      |      |      |       |       |       |                        |                                                                            |       |   |
|------|------|------|-------|-------|-------|------------------------|----------------------------------------------------------------------------|-------|---|
| 2482 | 2.23 | 2.38 | 16.14 | 16.14 | 9.259 | tr H0VGF2 H0VGF2_CAVPO | Uncharacterized protein (Fragment) OS=Cavia porcellus GN=VASP PE=4 SV=1    | CAVPO | 2 |
| 2483 | 2.22 | 6.03 | 15.76 | 14.35 | 7.882 | tr H0UUM0 H0UUM0_CAVPO | Uncharacterized protein OS=Cavia porcellus GN=DLG3 PE=4 SV=1               | CAVPO | 5 |
| 2484 | 2.22 | 2.25 | 39.32 | 17.09 | 17.09 | tr H0VJW6 H0VJW6_CAVPO | Uncharacterized protein OS=Cavia porcellus GN=Rpa3 PE=4 SV=1               | CAVPO | 2 |
| 2485 | 2.22 | 2.26 | 6.639 | 2.075 | 2.075 | tr H0VLI1 H0VLI1_CAVPO | Uncharacterized protein OS=Cavia porcellus GN=INTS4 PE=4 SV=1              | CAVPO | 2 |
| 2486 | 2.22 | 2.36 | 10.34 | 10.34 | 2.842 | tr H0W205 H0W205_CAVPO | Uncharacterized protein OS=Cavia porcellus GN=MCAT PE=4 SV=1               | CAVPO | 1 |
| 2487 | 2.21 | 2.32 | 6.491 | 2.86  | 1.76  | tr H0UVD6 H0UVD6_CAVPO | Uncharacterized protein OS=Cavia porcellus GN=HACE1 PE=4 SV=1              | CAVPO | 1 |
| 2488 | 2.21 | 2.37 | 6.869 | 5.945 | 4.359 | tr H0V8P7 H0V8P7_CAVPO | Uncharacterized protein OS=Cavia porcellus GN=MFN2 PE=4 SV=1               | CAVPO | 3 |
| 2489 | 2.21 | 2.35 | 18.55 | 10.71 | 6.119 | tr H0V9I4 H0V9I4_CAVPO | Uncharacterized protein OS=Cavia porcellus GN=ACBD3 PE=4 SV=1              | CAVPO | 2 |
| 2490 | 2.21 | 2.24 | 31.63 | 16.84 | 6.122 | tr H0VJB0 H0VJB0_CAVPO | Uncharacterized protein (Fragment) OS=Cavia porcellus GN=NAA10 PE=4 SV=1   | CAVPO | 1 |
| 2491 | 2.21 | 2.24 | 22.79 | 11.26 | 7.775 | tr H0VRR7 H0VRR7_CAVPO | Uncharacterized protein (Fragment) OS=Cavia porcellus GN=Cep41 PE=4 SV=1   | CAVPO | 2 |
| 2492 | 2.2  | 2.22 | 23.32 | 16.58 | 7.772 | tr H0UVN3 H0UVN3_CAVPO | Uncharacterized protein OS=Cavia porcellus GN=CSRP1 PE=4 SV=1              | CAVPO | 2 |
| 2493 | 2.2  | 2.26 | 13.61 | 7.483 | 2.948 | tr H0V2K7 H0V2K7_CAVPO | Uncharacterized protein (Fragment) OS=Cavia porcellus GN=ACOT9 PE=4 SV=1   | CAVPO | 1 |
| 2494 | 2.2  | 2.26 | 5.707 | 3.442 | 1.812 | tr H0V9H6 H0V9H6_CAVPO | Uncharacterized protein (Fragment) OS=Cavia porcellus GN=CCDC136 PE=4 SV=1 | CAVPO | 1 |
| 2495 | 2.2  | 16.1 | 34.04 | 27.02 | 24.56 | tr H0V9Q6 H0V9Q6_CAVPO | Uncharacterized protein OS=Cavia porcellus GN=TPM3 PE=3 SV=1               | CAVPO | 8 |

|      |      |      |       |       |       |                        |                                                                               |       |   |
|------|------|------|-------|-------|-------|------------------------|-------------------------------------------------------------------------------|-------|---|
| 2496 | 2.19 | 2.32 | 10.94 | 4.34  | 4.34  | tr H0VAE0 H0VAE0_CAVPO | Uncharacterized protein OS=Cavia porcellus<br>GN=OPTN PE=4 SV=1               | CAVPO | 2 |
| 2497 | 2.19 | 2.23 | 17.83 | 11.09 | 1.957 | tr H0VP96 H0VP96_CAVPO | Uncharacterized protein OS=Cavia porcellus<br>GN=CCDC6 PE=4 SV=1              | CAVPO | 1 |
| 2498 | 2.19 | 2.35 | 13.76 | 6.237 | 3.656 | tr H0W0L9 H0W0L9_CAVPO | Uncharacterized protein (Fragment) OS=Cavia<br>porcellus GN=OLFM1 PE=4 SV=1   | CAVPO | 2 |
| 2499 | 2.19 | 2.21 | 17.11 | 17.11 | 15.79 | tr H0W2T4 H0W2T4_CAVPO | Uncharacterized protein OS=Cavia porcellus<br>GN=SNRPG PE=4 SV=1              | CAVPO | 1 |
| 2500 | 2.19 | 2.22 | 17.67 | 5.511 | 2.107 | tr H0WDS3 H0WDS3_CAVPO | Uncharacterized protein OS=Cavia porcellus<br>GN=CCDC22 PE=4 SV=1             | CAVPO | 1 |
| 2501 | 2.18 | 2.21 | 19.2  | 16.91 | 3.725 | tr H0UVF2 H0UVF2_CAVPO | Uncharacterized protein OS=Cavia porcellus<br>GN=GKAP1 PE=4 SV=1              | CAVPO | 1 |
| 2502 | 2.18 | 2.2  | 4.583 | 4.583 | 2.708 | tr H0VJM4 H0VJM4_CAVPO | Uncharacterized protein OS=Cavia porcellus<br>GN=DHCR7 PE=4 SV=1              | CAVPO | 1 |
| 2503 | 2.18 | 2.34 | 12.44 | 7.68  | 2.611 | tr H0VLI9 H0VLI9_CAVPO | Uncharacterized protein (Fragment) OS=Cavia<br>porcellus GN=DPY19L1 PE=4 SV=1 | CAVPO | 2 |
| 2504 | 2.18 | 2.21 | 19.43 | 14.86 | 7.429 | tr Q9JKP6 Q9JKP6_CAVPO | Ferritin OS=Cavia porcellus PE=2 SV=1                                         | CAVPO | 1 |
| 2505 | 2.17 | 2.19 | 33.71 | 33.71 | 31.46 | tr H0V273 H0V273_CAVPO | Uncharacterized protein OS=Cavia porcellus<br>GN=HMGN4 PE=4 SV=1              | CAVPO | 3 |
| 2506 | 2.17 | 4.32 | 10.73 | 7.309 | 3.266 | tr H0V3F9 H0V3F9_CAVPO | Uncharacterized protein (Fragment) OS=Cavia<br>porcellus GN=SLC27A4 PE=4 SV=1 | CAVPO | 2 |
| 2507 | 2.17 | 2.2  | 6.025 | 2.895 | 1.095 | tr H0V792 H0V792_CAVPO | Uncharacterized protein OS=Cavia porcellus<br>GN=GIGYF2 PE=4 SV=1             | CAVPO | 1 |
| 2508 | 2.17 | 2.2  | 15.38 | 9.67  | 2.637 | tr H0VM37 H0VM37_CAVPO | Uncharacterized protein OS=Cavia porcellus<br>GN=HTRA2 PE=4 SV=1              | CAVPO | 1 |
| 2509 | 2.17 | 2.21 | 11.4  | 8.772 | 4.825 | tr H0VM72 H0VM72_CAVPO | Uncharacterized protein OS=Cavia porcellus<br>GN=CD9 PE=4 SV=1                | CAVPO | 1 |

|      |      |      |       |       |       |                        |                                                                                         |       |   |
|------|------|------|-------|-------|-------|------------------------|-----------------------------------------------------------------------------------------|-------|---|
| 2510 | 2.17 | 2.19 | 12.88 | 5.828 | 3.374 | tr H0W9U4 H0W9U4_CAVPO | Uncharacterized protein OS=Cavia porcellus<br>GN=STX16-NPEPL1 PE=3 SV=1                 | CAVPO | 1 |
| 2511 | 2.16 | 2.29 | 7.527 | 3.465 | 3.465 | tr H0UTR3 H0UTR3_CAVPO | Tuftelin-interacting protein 11 OS=Cavia<br>porcellus GN=TFIP11 PE=3 SV=1               | CAVPO | 2 |
| 2512 | 2.15 | 2.29 | 17.14 | 13.04 | 3.325 | tr H0VLY7 H0VLY7_CAVPO | Uncharacterized protein OS=Cavia porcellus<br>GN=GALK1 PE=3 SV=1                        | CAVPO | 1 |
| 2513 | 2.15 | 2.19 | 11.95 | 9.61  | 7.013 | tr H0VRF7 H0VRF7_CAVPO | Uncharacterized protein OS=Cavia porcellus<br>GN=SMARCB1 PE=4 SV=1                      | CAVPO | 2 |
| 2514 | 2.15 | 2.17 | 20.15 | 19.4  | 11.19 | tr H0W8T1 H0W8T1_CAVPO | 40S ribosomal protein S24 (Fragment)<br>OS=Cavia porcellus GN=LOC100724673 PE=3<br>SV=1 | CAVPO | 1 |
| 2515 | 2.14 | 6.2  | 14.7  | 12.99 | 6.838 | tr H0UYM9 H0UYM9_CAVPO | Uncharacterized protein (Fragment) OS=Cavia<br>porcellus GN=UBQLN4 PE=4 SV=1            | CAVPO | 4 |
| 2516 | 2.14 | 2.67 | 13.51 | 6.892 | 3.243 | tr H0VAY0 H0VAY0_CAVPO | Uncharacterized protein OS=Cavia porcellus<br>GN=RBM12B PE=4 SV=1                       | CAVPO | 2 |
| 2517 | 2.14 | 2.17 | 18.8  | 5     | 2.8   | tr H0VFS9 H0VFS9_CAVPO | Uncharacterized protein (Fragment) OS=Cavia<br>porcellus GN=PPIG PE=4 SV=1              | CAVPO | 1 |
| 2518 | 2.14 | 2.22 | 9.241 | 2.483 | 1.379 | tr H0VH82 H0VH82_CAVPO | Uncharacterized protein OS=Cavia porcellus<br>GN=TARS2 PE=3 SV=1                        | CAVPO | 1 |
| 2519 | 2.14 | 2.16 | 4.318 | 3.203 | 1.811 | tr H0VKY3 H0VKY3_CAVPO | Uncharacterized protein (Fragment) OS=Cavia<br>porcellus GN=TRIM67 PE=4 SV=1            | CAVPO | 1 |
| 2520 | 2.14 | 3.18 | 18.09 | 6.202 | 6.202 | tr H0VNF4 H0VNF4_CAVPO | Uncharacterized protein (Fragment) OS=Cavia<br>porcellus GN=NADK2 PE=4 SV=1             | CAVPO | 2 |
| 2521 | 2.13 | 2.3  | 9.58  | 7.059 | 7.059 | tr H0V2Y8 H0V2Y8_CAVPO | Uncharacterized protein (Fragment) OS=Cavia<br>porcellus GN=ZNF512 PE=4 SV=1            | CAVPO | 3 |
| 2522 | 2.13 | 2.18 | 8.798 | 5.15  | 3.004 | tr H0VD78 H0VD78_CAVPO | Uncharacterized protein OS=Cavia porcellus<br>GN=MPP1 PE=4 SV=1                         | CAVPO | 1 |
| 2523 | 2.13 | 2.26 | 18.93 | 8.214 | 4.286 | tr H0VLP3 H0VLP3_CAVPO | Uncharacterized protein OS=Cavia porcellus                                              | CAVPO | 1 |

|      |      |      |       |       |       |                        |                                                                                 |       |   |
|------|------|------|-------|-------|-------|------------------------|---------------------------------------------------------------------------------|-------|---|
|      |      |      |       |       |       |                        | GN=NMNAT1 PE=4 SV=1                                                             |       |   |
| 2524 | 2.13 | 2.15 | 22.81 | 22.81 | 11.4  | tr H0VZE8 H0VZE8_CAVPO | Uncharacterized protein (Fragment) OS=Cavia porcellus GN=LOC100728264 PE=4 SV=1 | CAVPO | 1 |
| 2525 | 2.12 | 2.14 | 7.495 | 5.484 | 2.559 | tr H0V0P4 H0V0P4_CAVPO | Uncharacterized protein OS=Cavia porcellus GN=DDX56 PE=4 SV=1                   | CAVPO | 1 |
| 2526 | 2.12 | 2.17 | 15.09 | 15.09 | 5.189 | tr H0W938 H0W938_CAVPO | Uncharacterized protein (Fragment) OS=Cavia porcellus GN=MOB1A PE=4 SV=1        | CAVPO | 1 |
| 2527 | 2.11 | 7.36 | 17.23 | 14.04 | 10.67 | tr H0UTJ4 H0UTJ4_CAVPO | Uncharacterized protein (Fragment) OS=Cavia porcellus GN=PPP2R5C PE=4 SV=1      | CAVPO | 5 |
| 2528 | 2.11 | 2.22 | 15.11 | 7.418 | 5.22  | tr H0VMC7 H0VMC7_CAVPO | Uncharacterized protein OS=Cavia porcellus GN=Ist1 PE=4 SV=1                    | CAVPO | 1 |
| 2529 | 2.11 | 2.14 | 29.79 | 6.507 | 4.11  | tr H0VNK1 H0VNK1_CAVPO | Uncharacterized protein (Fragment) OS=Cavia porcellus GN=CCDC50 PE=4 SV=1       | CAVPO | 1 |
| 2530 | 2.11 | 2.13 | 9.091 | 6.364 | 3.333 | tr H0VQZ3 H0VQZ3_CAVPO | Uncharacterized protein (Fragment) OS=Cavia porcellus GN=KDSR PE=3 SV=1         | CAVPO | 1 |
| 2531 | 2.11 | 2.95 | 6.667 | 3.74  | 3.74  | tr H0VT91 H0VT91_CAVPO | Uncharacterized protein OS=Cavia porcellus GN=LRIT1 PE=4 SV=1                   | CAVPO | 2 |
| 2532 | 2.11 | 2.25 | 28.64 | 25.13 | 18.09 | tr H0VUJ9 H0VUJ9_CAVPO | Uncharacterized protein (Fragment) OS=Cavia porcellus GN=MEMO1 PE=4 SV=1        | CAVPO | 2 |
| 2533 | 2.11 | 2.14 | 3.285 | 1.951 | 1.129 | tr H0W0U9 H0W0U9_CAVPO | Uncharacterized protein OS=Cavia porcellus GN=VPS18 PE=4 SV=1                   | CAVPO | 1 |
| 2534 | 2.11 | 2.15 | 10.96 | 3.373 | 1.686 | tr H0W1A0 H0W1A0_CAVPO | Uncharacterized protein OS=Cavia porcellus GN=STXBP2 PE=4 SV=1                  | CAVPO | 1 |
| 2535 | 2.1  | 3.52 | 8.333 | 6.481 | 3.009 | tr H0V8B3 H0V8B3_CAVPO | Uncharacterized protein OS=Cavia porcellus GN=KCNV2 PE=4 SV=1                   | CAVPO | 2 |
| 2536 | 2.09 | 2.11 | 10.37 | 4.259 | 2.963 | tr H0V1T9 H0V1T9_CAVPO | Uncharacterized protein OS=Cavia porcellus GN=PPM1G PE=3 SV=1                   | CAVPO | 1 |



|      |      |      |       |       |       |                        |                                                                                   |       |   |
|------|------|------|-------|-------|-------|------------------------|-----------------------------------------------------------------------------------|-------|---|
| 2537 | 2.09 | 4.38 | 13.91 | 6.653 | 4.435 | tr H0V5K0 H0V5K0_CAVPO | Uncharacterized protein OS=Cavia porcellus<br>GN=CDK16 PE=4 SV=1                  | CAVPO | 3 |
| 2538 | 2.09 | 2.3  | 25.71 | 25.71 | 12.86 | tr H0V9Z8 H0V9Z8_CAVPO | Uncharacterized protein OS=Cavia porcellus<br>GN=LAMP5 PE=4 SV=1                  | CAVPO | 3 |
| 2539 | 2.09 | 2.11 | 4.49  | 2.309 | 0.898 | tr H0VBS9 H0VBS9_CAVPO | Uncharacterized protein (Fragment) OS=Cavia<br>porcellus GN=LAMC1 PE=4 SV=1       | CAVPO | 1 |
| 2540 | 2.09 | 2.11 | 3.201 | 3.201 | 1.677 | tr H0VT86 H0VT86_CAVPO | Uncharacterized protein OS=Cavia porcellus<br>GN=SMPD3 PE=4 SV=1                  | CAVPO | 1 |
| 2541 | 2.09 | 2.24 | 19.03 | 7.386 | 7.386 | tr H0VWG7 H0VWG7_CAVPO | Uncharacterized protein OS=Cavia porcellus<br>GN=VPS37C PE=4 SV=1                 | CAVPO | 2 |
| 2542 | 2.09 | 2.22 | 9.259 | 4.444 | 4.444 | tr H0WCA0 H0WCA0_CAVPO | Uncharacterized protein (Fragment) OS=Cavia<br>porcellus GN=PPAP2B PE=4 SV=1      | CAVPO | 1 |
| 2543 | 2.08 | 2.22 | 9.163 | 3.791 | 3.791 | tr H0UY53 H0UY53_CAVPO | Uncharacterized protein (Fragment) OS=Cavia<br>porcellus GN=PARN PE=4 SV=1        | CAVPO | 2 |
| 2544 | 2.08 | 2.09 | 4.737 | 3.509 | 2.105 | tr H0V439 H0V439_CAVPO | Uncharacterized protein OS=Cavia porcellus<br>GN=MSTO1 PE=4 SV=1                  | CAVPO | 1 |
| 2545 | 2.08 | 2.09 | 23.94 | 23.94 | 23.94 | tr H0VRF4 H0VRF4_CAVPO | Uncharacterized protein OS=Cavia porcellus<br>GN=CHCHD10 PE=4 SV=1                | CAVPO | 2 |
| 2546 | 2.08 | 2.1  | 12.92 | 3.197 | 1.535 | tr H0VSW8 H0VSW8_CAVPO | Uncharacterized protein OS=Cavia porcellus<br>GN=KIAA1468 PE=4 SV=1               | CAVPO | 1 |
| 2547 | 2.08 | 2.1  | 7.941 | 6.176 | 3.235 | tr H0VSX8 H0VSX8_CAVPO | Uncharacterized protein (Fragment) OS=Cavia<br>porcellus GN=CD2BP2 PE=4 SV=1      | CAVPO | 1 |
| 2548 | 2.08 | 2.09 | 6.342 | 3.687 | 1.917 | tr H0W5D6 H0W5D6_CAVPO | Uncharacterized protein (Fragment) OS=Cavia<br>porcellus GN=RSBN1L PE=4 SV=1      | CAVPO | 1 |
| 2549 | 2.08 | 2.09 | 6.667 | 5.067 | 2.933 | tr H0WAU1 H0WAU1_CAVPO | Uncharacterized protein OS=Cavia porcellus<br>GN=MEIS3 PE=3 SV=1                  | CAVPO | 1 |
| 2550 | 2.07 | 2.97 | 22.27 | 13.64 | 2.955 | tr H0V248 H0V248_CAVPO | Glycylpeptide N-tetradecanoyltransferase<br>(Fragment) OS=Cavia porcellus GN=NMT2 | CAVPO | 1 |

|      |      |      |       |       |        |                        |                                                                                                  |       |    |
|------|------|------|-------|-------|--------|------------------------|--------------------------------------------------------------------------------------------------|-------|----|
|      |      |      |       |       |        |                        | PE=3 SV=1                                                                                        |       |    |
| 2551 | 2.07 | 2.08 | 40    | 20.67 | 9.333  | tr H0V922 H0V922_CAVPO | Uncharacterized protein OS=Cavia porcellus<br>GN=C5orf24 PE=4 SV=1                               | CAVPO | 1  |
| 2552 | 2.07 | 2.09 | 18.04 | 5.836 | 3.183  | tr H0VJR0 H0VJR0_CAVPO | Uncharacterized protein OS=Cavia porcellus<br>GN=HM13 PE=4 SV=1                                  | CAVPO | 1  |
| 2553 | 2.07 | 2.09 | 21.56 | 11.93 | 5.046  | tr H0VK89 H0VK89_CAVPO | Eukaryotic translation initiation factor 3<br>subunit K OS=Cavia porcellus GN=EIF3K PE=3<br>SV=1 | CAVPO | 1  |
| 2554 | 2.06 | 2.17 | 4.097 | 4.097 | 2.048  | tr H0UVT8 H0UVT8_CAVPO | Uncharacterized protein (Fragment) OS=Cavia<br>porcellus GN=MLLT1 PE=4 SV=1                      | CAVPO | 1  |
| 2555 | 2.06 | 2.1  | 7.98  | 4.072 | 2.28   | tr H0UW96 H0UW96_CAVPO | Uncharacterized protein (Fragment) OS=Cavia<br>porcellus GN=MEN1 PE=4 SV=1                       | CAVPO | 1  |
| 2556 | 2.06 | 3.3  | 12.5  | 12.5  | 6      | tr H0UYN8 H0UYN8_CAVPO | Uncharacterized protein OS=Cavia porcellus<br>GN=Hapb4 PE=4 SV=1                                 | CAVPO | 2  |
| 2557 | 2.06 | 2.27 | 16.14 | 10.76 | 4.933  | tr H0VGT2 H0VGT2_CAVPO | Uncharacterized protein OS=Cavia porcellus<br>GN=EPDR1 PE=4 SV=1                                 | CAVPO | 1  |
| 2558 | 2.06 | 29.5 | 59.78 | 42.98 | 41.6   | tr H0VIV8 H0VIV8_CAVPO | Uncharacterized protein (Fragment) OS=Cavia<br>porcellus GN=HNRNPA3 PE=4 SV=1                    | CAVPO | 29 |
| 2559 | 2.06 | 2.07 | 4.944 | 2.097 | 1.423  | tr H0VMQ3 H0VMQ3_CAVPO | Uncharacterized protein OS=Cavia porcellus<br>GN=RPTOR PE=4 SV=1                                 | CAVPO | 1  |
| 2560 | 2.06 | 2.44 | 5.364 | 1.756 | 0.6502 | tr H0VND7 H0VND7_CAVPO | Uncharacterized protein (Fragment) OS=Cavia<br>porcellus GN=LAMA1 PE=4 SV=1                      | CAVPO | 2  |
| 2561 | 2.06 | 2.15 | 25.85 | 21.61 | 10.59  | tr H0WD78 H0WD78_CAVPO | Uncharacterized protein OS=Cavia porcellus<br>PE=4 SV=1                                          | CAVPO | 1  |
| 2562 | 2.05 | 2.06 | 6.204 | 1.846 | 0.8863 | tr H0UV20 H0UV20_CAVPO | DNA mismatch repair protein MSH6<br>OS=Cavia porcellus GN=MSH6 PE=3 SV=1                         | CAVPO | 1  |
| 2563 | 2.05 | 3.66 | 12.98 | 4.606 | 2.68   | tr H0V152 H0V152_CAVPO | Uncharacterized protein OS=Cavia porcellus<br>GN=PPFIA3 PE=4 SV=1                                | CAVPO | 3  |

|      |      |      |       |       |        |                        |                                                                             |       |   |
|------|------|------|-------|-------|--------|------------------------|-----------------------------------------------------------------------------|-------|---|
| 2564 | 2.05 | 2.05 | 5.893 | 2.143 | 2.143  | tr H0V154 H0V154_CAVPO | Uncharacterized protein OS=Cavia porcellus<br>GN=TDRKH PE=4 SV=1            | CAVPO | 1 |
| 2565 | 2.05 | 2.13 | 12.66 | 6.846 | 3.112  | tr H0VP19 H0VP19_CAVPO | Uncharacterized protein (Fragment) OS=Cavia<br>porcellus GN=STK39 PE=4 SV=1 | CAVPO | 1 |
| 2566 | 2.05 | 2.06 | 32.63 | 23.16 | 12.63  | tr H0WCS2 H0WCS2_CAVPO | Uncharacterized protein OS=Cavia porcellus<br>GN=Sumo2 PE=4 SV=1            | CAVPO | 1 |
| 2567 | 2.04 | 3.32 | 6.076 | 1.83  | 1.245  | tr H0UW50 H0UW50_CAVPO | Uncharacterized protein OS=Cavia porcellus<br>GN=BRD4 PE=4 SV=1             | CAVPO | 2 |
| 2568 | 2.04 | 2.21 | 19.52 | 8.571 | 8.571  | tr H0UWG3 H0UWG3_CAVPO | Uncharacterized protein OS=Cavia porcellus<br>GN=POLR2E PE=3 SV=1           | CAVPO | 2 |
| 2569 | 2.04 | 2.05 | 8.685 | 3.474 | 3.474  | tr H0UXR7 H0UXR7_CAVPO | Uncharacterized protein OS=Cavia porcellus<br>GN=INPP1 PE=4 SV=1            | CAVPO | 1 |
| 2570 | 2.04 | 2.05 | 4.183 | 2.471 | 2.471  | tr H0V4R0 H0V4R0_CAVPO | Uncharacterized protein (Fragment) OS=Cavia<br>porcellus GN=PNKP PE=4 SV=1  | CAVPO | 1 |
| 2571 | 2.04 | 2.52 | 8.045 | 1.727 | 0.5055 | tr H0VB25 H0VB25_CAVPO | Uncharacterized protein (Fragment) OS=Cavia<br>porcellus GN=ATRX PE=4 SV=1  | CAVPO | 1 |
| 2572 | 2.04 | 6.06 | 18.92 | 17.84 | 17.84  | tr H0VCA7 H0VCA7_CAVPO | Uncharacterized protein (Fragment) OS=Cavia<br>porcellus GN=CBX1 PE=4 SV=1  | CAVPO | 3 |
| 2573 | 2.04 | 2.04 | 17.34 | 11.56 | 11.56  | tr H0VFU8 H0VFU8_CAVPO | Uncharacterized protein OS=Cavia porcellus<br>GN=GCSH PE=3 SV=1             | CAVPO | 1 |
| 2574 | 2.04 | 2.05 | 10.89 | 5.611 | 5.611  | tr H0VHN1 H0VHN1_CAVPO | Elongation factor Ts (Fragment) OS=Cavia<br>porcellus GN=TSFM PE=3 SV=1     | CAVPO | 1 |
| 2575 | 2.04 | 2.05 | 9.649 | 2.193 | 2.193  | tr H0VKT4 H0VKT4_CAVPO | Uncharacterized protein (Fragment) OS=Cavia<br>porcellus GN=EPS8 PE=4 SV=1  | CAVPO | 1 |
| 2576 | 2.04 | 2.04 | 6.992 | 4.025 | 2.542  | tr H0VLY6 H0VLY6_CAVPO | Uncharacterized protein OS=Cavia porcellus<br>GN=MBOAT7 PE=4 SV=1           | CAVPO | 1 |
| 2577 | 2.04 | 2.05 | 10.41 | 2.048 | 2.048  | tr H0VQH8 H0VQH8_CAVPO | Uncharacterized protein (Fragment) OS=Cavia<br>porcellus GN=PLBD2 PE=4 SV=1 | CAVPO | 1 |

|      |      |      |       |        |        |                        |                                                                                |       |   |
|------|------|------|-------|--------|--------|------------------------|--------------------------------------------------------------------------------|-------|---|
| 2578 | 2.04 | 2.05 | 13.44 | 4.743  | 4.743  | tr H0VSC4 H0VSC4_CAVPO | Uncharacterized protein OS=Cavia porcellus<br>GN=FGFR1OP2 PE=4 SV=1            | CAVPO | 1 |
| 2579 | 2.04 | 2.05 | 3.463 | 3.463  | 1.385  | tr H0VU91 H0VU91_CAVPO | Uncharacterized protein (Fragment) OS=Cavia<br>porcellus GN=INPP4B PE=4 SV=1   | CAVPO | 1 |
| 2580 | 2.04 | 2.2  | 12.33 | 9.692  | 5.286  | tr H0VWH5 H0VWH5_CAVPO | Uncharacterized protein (Fragment) OS=Cavia<br>porcellus GN=ANKRD33B PE=4 SV=1 | CAVPO | 1 |
| 2581 | 2.04 | 2.07 | 5.649 | 0.9932 | 0.6828 | tr H0W7Q9 H0W7Q9_CAVPO | Cytosine-specific methyltransferase OS=Cavia<br>porcellus GN=DNMT1 PE=3 SV=1   | CAVPO | 1 |
| 2582 | 2.03 | 2.03 | 20.71 | 8.571  | 8.571  | tr H0UUV9 H0UUV9_CAVPO | Uncharacterized protein OS=Cavia porcellus<br>GN=CCDC126 PE=4 SV=1             | CAVPO | 1 |
| 2583 | 2.03 | 2.04 | 7.27  | 1.646  | 1.646  | tr H0VHU6 H0VHU6_CAVPO | Uncharacterized protein OS=Cavia porcellus<br>GN=TBK1 PE=4 SV=1                | CAVPO | 1 |
| 2584 | 2.03 | 2.03 | 34.33 | 26.12  | 26.12  | tr H0VLJ0 H0VLJ0_CAVPO | Uncharacterized protein (Fragment) OS=Cavia<br>porcellus GN=PFDN4 PE=4 SV=1    | CAVPO | 2 |
| 2585 | 2.03 | 2.05 | 7.537 | 1.884  | 1.884  | tr H0VLL6 H0VLL6_CAVPO | Dystrobrevin OS=Cavia porcellus GN=DTNA<br>PE=3 SV=1                           | CAVPO | 1 |
| 2586 | 2.03 | 2.18 | 13.77 | 8.945  | 6.798  | tr H0VM09 H0VM09_CAVPO | Uncharacterized protein (Fragment) OS=Cavia<br>porcellus GN=SGPL1 PE=3 SV=1    | CAVPO | 2 |
| 2587 | 2.03 | 2.21 | 13.47 | 8.632  | 5.684  | tr H0VSK3 H0VSK3_CAVPO | Uncharacterized protein OS=Cavia porcellus<br>GN=SPTLC1 PE=4 SV=1              | CAVPO | 2 |
| 2588 | 2.03 | 2.03 | 13.79 | 8.966  | 8.966  | tr H0VSU4 H0VSU4_CAVPO | Uncharacterized protein OS=Cavia porcellus<br>GN=TOMM20 PE=4 SV=1              | CAVPO | 2 |
| 2589 | 2.03 | 2.09 | 6.531 | 5.102  | 3.061  | tr H0VVP8 H0VVP8_CAVPO | Uncharacterized protein (Fragment) OS=Cavia<br>porcellus GN=KCNA3 PE=4 SV=1    | CAVPO | 1 |
| 2590 | 2.03 | 2.04 | 9.477 | 3.268  | 3.268  | tr H0W265 H0W265_CAVPO | Uncharacterized protein (Fragment) OS=Cavia<br>porcellus GN=CTSZ PE=3 SV=1     | CAVPO | 1 |
| 2591 | 2.03 | 2.04 | 17.19 | 4.688  | 4.688  | tr H0W4R5 H0W4R5_CAVPO | Uncharacterized protein (Fragment) OS=Cavia<br>porcellus GN=CA8 PE=4 SV=1      | CAVPO | 1 |

|      |      |      |       |       |       |                        |                                                                              |       |   |
|------|------|------|-------|-------|-------|------------------------|------------------------------------------------------------------------------|-------|---|
| 2592 | 2.03 | 2.13 | 7.324 | 5.634 | 2.817 | tr H0WCR1 H0WCR1_CAVPO | Uncharacterized protein OS=Cavia porcellus<br>GN=IMPAD1 PE=4 SV=1            | CAVPO | 1 |
| 2593 | 2.03 | 2.03 | 10.62 | 6.227 | 6.227 | tr O35477 O35477_CAVPO | Green-sensitive opsin (Fragment) OS=Cavia<br>porcellus PE=2 SV=1             | CAVPO | 2 |
| 2594 | 2.02 | 2.52 | 7.759 | 5.345 | 2.759 | tr H0UZS1 H0UZS1_CAVPO | Uncharacterized protein (Fragment) OS=Cavia<br>porcellus GN=YTHDF3 PE=4 SV=1 | CAVPO | 1 |
| 2595 | 2.02 | 2.03 | 23.61 | 5.093 | 5.093 | tr H0V4R1 H0V4R1_CAVPO | Uncharacterized protein OS=Cavia porcellus<br>GN=CNPY4 PE=4 SV=1             | CAVPO | 1 |
| 2596 | 2.02 | 2.02 | 16.74 | 8.372 | 8.372 | tr H0V5Q2 H0V5Q2_CAVPO | Uncharacterized protein (Fragment) OS=Cavia<br>porcellus GN=SCN2B PE=4 SV=1  | CAVPO | 1 |
| 2597 | 2.02 | 2.02 | 10.74 | 3.306 | 3.306 | tr H0V829 H0V829_CAVPO | Uncharacterized protein OS=Cavia porcellus<br>GN=AGPAT5 PE=4 SV=1            | CAVPO | 1 |
| 2598 | 2.02 | 2.02 | 8.251 | 4.29  | 4.29  | tr H0V8E1 H0V8E1_CAVPO | Uncharacterized protein (Fragment) OS=Cavia<br>porcellus GN=YIF1B PE=4 SV=1  | CAVPO | 1 |
| 2599 | 2.02 | 2.03 | 8.841 | 2.161 | 2.161 | tr H0VA23 H0VA23_CAVPO | Uncharacterized protein (Fragment) OS=Cavia<br>porcellus GN=ARSA PE=4 SV=1   | CAVPO | 1 |
| 2600 | 2.02 | 2.04 | 18.64 | 7.91  | 7.91  | tr H0VD27 H0VD27_CAVPO | Uncharacterized protein OS=Cavia porcellus<br>GN=CUTA PE=4 SV=1              | CAVPO | 1 |
| 2601 | 2.02 | 2.03 | 24.55 | 12.73 | 12.73 | tr H0VDL5 H0VDL5_CAVPO | Uncharacterized protein OS=Cavia porcellus<br>GN=SRP14 PE=4 SV=1             | CAVPO | 1 |
| 2602 | 2.02 | 2.03 | 6.144 | 2.331 | 2.331 | tr H0VK74 H0VK74_CAVPO | Uncharacterized protein OS=Cavia porcellus<br>GN=PRCC PE=4 SV=1              | CAVPO | 1 |
| 2603 | 2.02 | 2.35 | 11.07 | 6.086 | 3.596 | tr H0VL16 H0VL16_CAVPO | Uncharacterized protein (Fragment) OS=Cavia<br>porcellus GN=APLP2 PE=4 SV=1  | CAVPO | 3 |
| 2604 | 2.02 | 2.02 | 15.53 | 7.767 | 7.767 | tr H0VQ30 H0VQ30_CAVPO | Uncharacterized protein (Fragment) OS=Cavia<br>porcellus GN=LSM7 PE=4 SV=1   | CAVPO | 1 |
| 2605 | 2.02 | 2.03 | 9.375 | 2.539 | 2.539 | tr H0VQ36 H0VQ36_CAVPO | Uncharacterized protein (Fragment) OS=Cavia<br>porcellus GN=PODXL PE=4 SV=1  | CAVPO | 1 |

|      |      |      |       |       |       |                        |                                                                           |       |   |
|------|------|------|-------|-------|-------|------------------------|---------------------------------------------------------------------------|-------|---|
| 2606 | 2.02 | 2.03 | 8.088 | 8.088 | 8.088 | tr H0VRN6 H0VRN6_CAVPO | Uncharacterized protein (Fragment) OS=Cavia porcellus GN=Fau PE=4 SV=1    | CAVPO | 2 |
| 2607 | 2.02 | 2.02 | 22.97 | 7.432 | 7.432 | tr H0VZC2 H0VZC2_CAVPO | Uncharacterized protein OS=Cavia porcellus GN=Rpl27a PE=3 SV=1            | CAVPO | 1 |
| 2608 | 2.02 | 2.15 | 10.63 | 10.63 | 10.63 | tr H0W6U9 H0W6U9_CAVPO | Uncharacterized protein OS=Cavia porcellus GN=AP1S2 PE=4 SV=1             | CAVPO | 2 |
| 2609 | 2.02 | 2.02 | 5.191 | 1.679 | 1.679 | tr H0W7E3 H0W7E3_CAVPO | Uncharacterized protein (Fragment) OS=Cavia porcellus GN=NUP85 PE=4 SV=1  | CAVPO | 1 |
| 2610 | 2.02 | 2.03 | 6.278 | 3.587 | 3.587 | tr H0W7S7 H0W7S7_CAVPO | Uncharacterized protein OS=Cavia porcellus GN=Sigmar1 PE=4 SV=1           | CAVPO | 1 |
| 2611 | 2.01 | 2.01 | 7.325 | 1.704 | 1.704 | tr H0UVL2 H0UVL2_CAVPO | Uncharacterized protein (Fragment) OS=Cavia porcellus GN=FNBP1 PE=4 SV=1  | CAVPO | 1 |
| 2612 | 2.01 | 6.59 | 12.05 | 9.178 | 9.178 | tr H0UXP0 H0UXP0_CAVPO | Uncharacterized protein OS=Cavia porcellus GN=FAM98A PE=4 SV=1            | CAVPO | 4 |
| 2613 | 2.01 | 2.01 | 25    | 12.88 | 12.88 | tr H0UXX5 H0UXX5_CAVPO | Uncharacterized protein (Fragment) OS=Cavia porcellus GN=HYPK PE=4 SV=1   | CAVPO | 1 |
| 2614 | 2.01 | 2.12 | 6.096 | 4.064 | 2.322 | tr H0UZQ4 H0UZQ4_CAVPO | Uncharacterized protein (Fragment) OS=Cavia porcellus GN=Sp3 PE=4 SV=1    | CAVPO | 1 |
| 2615 | 2.01 | 2.02 | 4.645 | 3.005 | 3.005 | tr H0V0Q3 H0V0Q3_CAVPO | Uncharacterized protein (Fragment) OS=Cavia porcellus GN=GTF2A1 PE=4 SV=1 | CAVPO | 1 |
| 2616 | 2.01 | 2.01 | 5.371 | 2.054 | 2.054 | tr H0V0S0 H0V0S0_CAVPO | Uncharacterized protein OS=Cavia porcellus GN=CLPX PE=4 SV=1              | CAVPO | 1 |
| 2617 | 2.01 | 2.02 | 9.034 | 4.673 | 4.673 | tr H0V9E1 H0V9E1_CAVPO | Annexin (Fragment) OS=Cavia porcellus GN=ANXA4 PE=3 SV=1                  | CAVPO | 1 |
| 2618 | 2.01 | 2.01 | 14.94 | 5.364 | 5.364 | tr H0V9I0 H0V9I0_CAVPO | Uncharacterized protein (Fragment) OS=Cavia porcellus GN=MRPL28 PE=4 SV=1 | CAVPO | 1 |
| 2619 | 2.01 | 2.02 | 15.91 | 9.091 | 9.091 | tr H0V9I8 H0V9I8_CAVPO | Uncharacterized protein OS=Cavia porcellus GN=FABP4 PE=3 SV=1             | CAVPO | 2 |

|      |      |      |       |       |       |                        |                                                                           |       |   |
|------|------|------|-------|-------|-------|------------------------|---------------------------------------------------------------------------|-------|---|
| 2620 | 2.01 | 2.02 | 3.834 | 2.738 | 1.205 | tr H0VB33 H0VB33_CAVPO | Uncharacterized protein (Fragment) OS=Cavia porcellus GN=RASA1 PE=4 SV=1  | CAVPO | 1 |
| 2621 | 2.01 | 2.01 | 5.714 | 3.117 | 3.117 | tr H0VB97 H0VB97_CAVPO | Uncharacterized protein OS=Cavia porcellus GN=LIMS1 PE=4 SV=1             | CAVPO | 1 |
| 2622 | 2.01 | 2.02 | 6.267 | 2.4   | 2.4   | tr H0VCS6 H0VCS6_CAVPO | Uncharacterized protein (Fragment) OS=Cavia porcellus GN=TCEB3 PE=4 SV=1  | CAVPO | 1 |
| 2623 | 2.01 | 2.02 | 11.01 | 7.048 | 7.048 | tr H0VEN2 H0VEN2_CAVPO | Uncharacterized protein (Fragment) OS=Cavia porcellus GN=NCCRP1 PE=4 SV=1 | CAVPO | 1 |
| 2624 | 2.01 | 2.02 | 14.39 | 6.439 | 6.439 | tr H0VF48 H0VF48_CAVPO | Uncharacterized protein OS=Cavia porcellus GN=C12orf5 PE=4 SV=1           | CAVPO | 1 |
| 2625 | 2.01 | 2.01 | 7.65  | 6.557 | 6.557 | tr H0W5K7 H0W5K7_CAVPO | Uncharacterized protein OS=Cavia porcellus GN=JAGN1 PE=4 SV=1             | CAVPO | 1 |
| 2626 | 2.01 | 2.02 | 9.117 | 3.989 | 3.989 | tr H0W753 H0W753_CAVPO | Uncharacterized protein OS=Cavia porcellus GN=NECAB1 PE=4 SV=1            | CAVPO | 1 |
| 2627 | 2.01 | 2.14 | 16.56 | 5.664 | 3.486 | tr H0WAP8 H0WAP8_CAVPO | Uncharacterized protein OS=Cavia porcellus GN=SON PE=4 SV=1               | CAVPO | 1 |
| 2628 | 2.01 | 2.18 | 22.63 | 12.11 | 6.842 | tr H0WB83 H0WB83_CAVPO | Uncharacterized protein (Fragment) OS=Cavia porcellus GN=Dnal1 PE=4 SV=1  | CAVPO | 1 |
| 2629 | 2.01 | 2.01 | 13.14 | 13.14 | 13.14 | tr H0WD05 H0WD05_CAVPO | Uncharacterized protein OS=Cavia porcellus GN=AGPAT1 PE=4 SV=1            | CAVPO | 2 |
| 2630 | 2.01 | 2.01 | 5.013 | 2.375 | 2.375 | tr Q9TEF9 Q9TEF9_CAVPO | Cytochrome b OS=Cavia porcellus GN=cytb PE=3 SV=1                         | CAVPO | 1 |
| 2631 | 2    | 2    | 5.43  | 5.43  | 5.43  | tr H0UTS1 H0UTS1_CAVPO | Uncharacterized protein (Fragment) OS=Cavia porcellus GN=SYNGR1 PE=4 SV=1 | CAVPO | 1 |
| 2632 | 2    | 2    | 2.033 | 2.033 | 2.033 | tr H0UU74 H0UU74_CAVPO | Uncharacterized protein OS=Cavia porcellus GN=PRAME PE=4 SV=1             | CAVPO | 1 |
| 2633 | 2    | 2    | 13.13 | 8.586 | 8.586 | tr H0UVV0 H0UVV0_CAVPO | Inosine triphosphate pyrophosphatase OS=Cavia porcellus GN=ITPA PE=3 SV=1 | CAVPO | 1 |

|      |   |      |       |       |       |                        |                                                                               |       |   |
|------|---|------|-------|-------|-------|------------------------|-------------------------------------------------------------------------------|-------|---|
| 2634 | 2 | 2    | 25.88 | 14.12 | 14.12 | tr H0UW09 H0UW09_CAVPO | Uncharacterized protein OS=Cavia porcellus<br>GN=MANBAL PE=4 SV=1             | CAVPO | 1 |
| 2635 | 2 | 2    | 2.23  | 2.23  | 2.23  | tr H0UWB9 H0UWB9_CAVPO | Uncharacterized protein (Fragment) OS=Cavia<br>porcellus GN=SLC2A12 PE=3 SV=1 | CAVPO | 1 |
| 2636 | 2 | 2    | 3.036 | 1.469 | 1.469 | tr H0UX28 H0UX28_CAVPO | Uncharacterized protein OS=Cavia porcellus<br>GN=MPRIPE PE=4 SV=1             | CAVPO | 1 |
| 2637 | 2 | 2    | 2.817 | 1.921 | 1.921 | tr H0UXN0 H0UXN0_CAVPO | Uncharacterized protein OS=Cavia porcellus<br>GN=E4F1 PE=4 SV=1               | CAVPO | 1 |
| 2638 | 2 | 2    | 5.342 | 3.205 | 3.205 | tr H0UY76 H0UY76_CAVPO | Uncharacterized protein (Fragment) OS=Cavia<br>porcellus GN=FAM63B PE=4 SV=1  | CAVPO | 1 |
| 2639 | 2 | 2    | 3.896 | 3.896 | 3.896 | tr H0UY88 H0UY88_CAVPO | Uncharacterized protein (Fragment) OS=Cavia<br>porcellus GN=TMED1 PE=3 SV=1   | CAVPO | 1 |
| 2640 | 2 | 2    | 9.917 | 9.917 | 9.917 | tr H0UZI9 H0UZI9_CAVPO | Protein yippee-like (Fragment) OS=Cavia<br>porcellus GN=YPEL5 PE=3 SV=1       | CAVPO | 1 |
| 2641 | 2 | 2    | 3.249 | 3.249 | 3.249 | tr H0V0S2 H0V0S2_CAVPO | Uncharacterized protein OS=Cavia porcellus<br>GN=TRIM14 PE=4 SV=1             | CAVPO | 1 |
| 2642 | 2 | 4.21 | 10    | 10    | 7.2   | tr H0V0U1 H0V0U1_CAVPO | Uncharacterized protein OS=Cavia porcellus<br>GN=OTX2 PE=3 SV=1               | CAVPO | 2 |
| 2643 | 2 | 2    | 12.42 | 12.42 | 12.42 | tr H0V0U2 H0V0U2_CAVPO | Uncharacterized protein OS=Cavia porcellus<br>GN=NHP2 PE=4 SV=1               | CAVPO | 1 |
| 2644 | 2 | 2    | 12    | 12    | 12    | tr H0V151 H0V151_CAVPO | Uncharacterized protein OS=Cavia porcellus<br>GN=RBM3 PE=4 SV=1               | CAVPO | 1 |
| 2645 | 2 | 2.01 | 11.42 | 4.152 | 4.152 | tr H0V1C1 H0V1C1_CAVPO | Uncharacterized protein OS=Cavia porcellus<br>GN=ATPAF2 PE=4 SV=1             | CAVPO | 1 |
| 2646 | 2 | 2    | 9.677 | 9.677 | 9.677 | tr H0V298 H0V298_CAVPO | Uncharacterized protein OS=Cavia porcellus<br>GN=TMEM254 PE=4 SV=1            | CAVPO | 1 |
| 2647 | 2 | 2    | 11.22 | 11.22 | 11.22 | tr H0V2B0 H0V2B0_CAVPO | Uncharacterized protein OS=Cavia porcellus<br>GN=RNASEK PE=4 SV=1             | CAVPO | 2 |



|      |   |      |       |       |       |                        |                                                                               |       |    |
|------|---|------|-------|-------|-------|------------------------|-------------------------------------------------------------------------------|-------|----|
| 2648 | 2 | 2    | 4.154 | 4.154 | 4.154 | tr H0V2M9 H0V2M9_CAVPO | Uncharacterized protein OS=Cavia porcellus<br>GN=RRH PE=3 SV=1                | CAVPO | 1  |
| 2649 | 2 | 2.02 | 9.95  | 6.468 | 6.468 | tr H0V2U0 H0V2U0_CAVPO | Uncharacterized protein OS=Cavia porcellus<br>GN=FXN PE=4 SV=1                | CAVPO | 1  |
| 2650 | 2 | 4.06 | 10.8  | 5.634 | 5.634 | tr H0V4S4 H0V4S4_CAVPO | Uncharacterized protein OS=Cavia porcellus<br>GN=ACTL6B PE=3 SV=1             | CAVPO | 2  |
| 2651 | 2 | 2    | 25.86 | 25.86 | 25.86 | tr H0V555 H0V555_CAVPO | Uncharacterized protein OS=Cavia porcellus<br>GN=USMG5 PE=4 SV=1              | CAVPO | 1  |
| 2652 | 2 | 2.01 | 2.585 | 1.497 | 1.497 | tr H0V624 H0V624_CAVPO | Uncharacterized protein OS=Cavia porcellus<br>GN=PNISR PE=4 SV=1              | CAVPO | 1  |
| 2653 | 2 | 10.5 | 53.8  | 46.2  | 46.2  | tr H0V6D2 H0V6D2_CAVPO | Uncharacterized protein OS=Cavia porcellus<br>GN=Rps27a PE=4 SV=1             | CAVPO | 14 |
| 2654 | 2 | 2    | 3.869 | 2.227 | 1.641 | tr H0V6N6 H0V6N6_CAVPO | Uncharacterized protein OS=Cavia porcellus<br>GN=TMEM245 PE=4 SV=1            | CAVPO | 1  |
| 2655 | 2 | 2    | 23.6  | 15.73 | 15.73 | tr H0V6V5 H0V6V5_CAVPO | Uncharacterized protein OS=Cavia porcellus<br>GN=COX19 PE=4 SV=1              | CAVPO | 1  |
| 2656 | 2 | 2    | 9.655 | 9.655 | 9.655 | tr H0V6W0 H0V6W0_CAVPO | Uncharacterized protein (Fragment) OS=Cavia<br>porcellus GN=C7orf50 PE=4 SV=1 | CAVPO | 1  |
| 2657 | 2 | 2    | 7.975 | 7.975 | 7.975 | tr H0V7H8 H0V7H8_CAVPO | Uncharacterized protein OS=Cavia porcellus<br>GN=Vkorc1 PE=4 SV=1             | CAVPO | 1  |
| 2658 | 2 | 5.77 | 57.3  | 49.44 | 49.44 | tr H0V8N4 H0V8N4_CAVPO | Uncharacterized protein OS=Cavia porcellus<br>GN=DYNLL1 PE=4 SV=1             | CAVPO | 3  |
| 2659 | 2 | 2    | 10.75 | 10.75 | 10.75 | tr H0V9A1 H0V9A1_CAVPO | Uncharacterized protein OS=Cavia porcellus<br>GN=SH3BGRL3 PE=4 SV=1           | CAVPO | 1  |
| 2660 | 2 | 2    | 14.39 | 14.39 | 14.39 | tr H0V9T3 H0V9T3_CAVPO | Uncharacterized protein OS=Cavia porcellus<br>GN=CNIH4 PE=4 SV=1              | CAVPO | 1  |
| 2661 | 2 | 3.14 | 33.33 | 33.33 | 33.33 | tr H0VCF8 H0VCF8_CAVPO | Uncharacterized protein (Fragment) OS=Cavia<br>porcellus GN=VAMP1 PE=4 SV=1   | CAVPO | 3  |

|      |   |      |       |       |       |                        |                                                                              |       |   |
|------|---|------|-------|-------|-------|------------------------|------------------------------------------------------------------------------|-------|---|
| 2662 | 2 | 2    | 7.853 | 7.853 | 7.853 | tr H0VCP2 H0VCP2_CAVPO | Uncharacterized protein OS=Cavia porcellus<br>GN=NTPCR PE=4 SV=1             | CAVPO | 1 |
| 2663 | 2 | 2.01 | 7.527 | 5.018 | 5.018 | tr H0VD08 H0VD08_CAVPO | Uncharacterized protein (Fragment) OS=Cavia<br>porcellus GN=RFC3 PE=4 SV=1   | CAVPO | 1 |
| 2664 | 2 | 2.01 | 4.723 | 1.629 | 1.629 | tr H0VDT1 H0VDT1_CAVPO | Uncharacterized protein OS=Cavia porcellus<br>GN=CRTC1 PE=4 SV=1             | CAVPO | 1 |
| 2665 | 2 | 2.03 | 8.032 | 4.819 | 4.819 | tr H0VDY4 H0VDY4_CAVPO | Uncharacterized protein (Fragment) OS=Cavia<br>porcellus GN=Cd63 PE=4 SV=1   | CAVPO | 1 |
| 2666 | 2 | 2    | 2.376 | 2.376 | 2.376 | tr H0VEI1 H0VEI1_CAVPO | Uncharacterized protein OS=Cavia porcellus<br>GN=NRF1 PE=4 SV=1              | CAVPO | 1 |
| 2667 | 2 | 2    | 6.011 | 6.011 | 6.011 | tr H0VER5 H0VER5_CAVPO | Uncharacterized protein OS=Cavia porcellus<br>GN=GNPNAT1 PE=4 SV=1           | CAVPO | 1 |
| 2668 | 2 | 2    | 2.506 | 2.506 | 2.506 | tr H0VF14 H0VF14_CAVPO | Uncharacterized protein (Fragment) OS=Cavia<br>porcellus GN=ENTPD5 PE=3 SV=1 | CAVPO | 1 |
| 2669 | 2 | 2.03 | 6.422 | 2.752 | 2.752 | tr H0VFJ7 H0VFJ7_CAVPO | Uncharacterized protein OS=Cavia porcellus<br>GN=SPATS2 PE=4 SV=1            | CAVPO | 2 |
| 2670 | 2 | 2.04 | 2.652 | 1.641 | 1.641 | tr H0VG98 H0VG98_CAVPO | Uncharacterized protein (Fragment) OS=Cavia<br>porcellus GN=KIFAP3 PE=4 SV=1 | CAVPO | 1 |
| 2671 | 2 | 2    | 3.903 | 2.23  | 2.23  | tr H0VHY3 H0VHY3_CAVPO | Uncharacterized protein OS=Cavia porcellus<br>GN=CWF19L1 PE=4 SV=1           | CAVPO | 1 |
| 2672 | 2 | 2    | 12.07 | 5.46  | 5.46  | tr H0VII8 H0VII8_CAVPO | Uncharacterized protein OS=Cavia porcellus<br>GN=NFYA PE=4 SV=1              | CAVPO | 1 |
| 2673 | 2 | 2    | 3.019 | 3.019 | 3.019 | tr H0VKC3 H0VKC3_CAVPO | Palmitoyltransferase OS=Cavia porcellus<br>GN=ZDHHC21 PE=3 SV=1              | CAVPO | 1 |
| 2674 | 2 | 2    | 4.79  | 4.79  | 4.79  | tr H0VM12 H0VM12_CAVPO | Uncharacterized protein (Fragment) OS=Cavia<br>porcellus GN=SDHC PE=4 SV=1   | CAVPO | 1 |
| 2675 | 2 | 2    | 4.333 | 4.333 | 4.333 | tr H0VP35 H0VP35_CAVPO | Uncharacterized protein (Fragment) OS=Cavia<br>porcellus GN=OTUD6B PE=4 SV=1 | CAVPO | 1 |

|      |   |      |       |       |       |                        |                                                                                |       |    |
|------|---|------|-------|-------|-------|------------------------|--------------------------------------------------------------------------------|-------|----|
| 2676 | 2 | 2    | 14.06 | 14.06 | 14.06 | tr H0VPC5 H0VPC5_CAVPO | Uncharacterized protein OS=Cavia porcellus<br>GN=NDUFB6 PE=4 SV=1              | CAVPO | 1  |
| 2677 | 2 | 2.01 | 4.971 | 2.924 | 2.924 | tr H0VPE0 H0VPE0_CAVPO | Uncharacterized protein OS=Cavia porcellus<br>GN=TUSC3 PE=4 SV=1               | CAVPO | 1  |
| 2678 | 2 | 2    | 4.255 | 4.255 | 4.255 | tr H0VPE5 H0VPE5_CAVPO | Uncharacterized protein OS=Cavia porcellus<br>GN=TMCO1 PE=4 SV=1               | CAVPO | 1  |
| 2679 | 2 | 2    | 16.05 | 16.05 | 16.05 | tr H0VQC3 H0VQC3_CAVPO | Uncharacterized protein OS=Cavia porcellus<br>GN=COX7A1 PE=4 SV=1              | CAVPO | 1  |
| 2680 | 2 | 2    | 14.47 | 7.895 | 7.895 | tr H0VQQ5 H0VQQ5_CAVPO | Uncharacterized protein OS=Cavia porcellus<br>GN=OARD1 PE=4 SV=1               | CAVPO | 1  |
| 2681 | 2 | 13   | 48.19 | 47.15 | 47.15 | tr H0VRA2 H0VRA2_CAVPO | Uncharacterized protein OS=Cavia porcellus<br>GN=RHOC PE=3 SV=1                | CAVPO | 10 |
| 2682 | 2 | 2    | 3.141 | 3.141 | 3.141 | tr H0VRL2 H0VRL2_CAVPO | Uncharacterized protein OS=Cavia porcellus<br>GN=SH3BP5L PE=4 SV=1             | CAVPO | 1  |
| 2683 | 2 | 2    | 5.495 | 5.495 | 5.495 | tr H0VT54 H0VT54_CAVPO | Uncharacterized protein (Fragment) OS=Cavia<br>porcellus GN=ZBTB8OS PE=4 SV=1  | CAVPO | 1  |
| 2684 | 2 | 2.01 | 10.03 | 3.762 | 3.762 | tr H0VTA9 H0VTA9_CAVPO | Uncharacterized protein (Fragment) OS=Cavia<br>porcellus GN=C6orf136 PE=4 SV=1 | CAVPO | 1  |
| 2685 | 2 | 2    | 4.598 | 4.598 | 4.598 | tr H0VTS8 H0VTS8_CAVPO | Uncharacterized protein OS=Cavia porcellus<br>GN=ENOPH1 PE=3 SV=1              | CAVPO | 1  |
| 2686 | 2 | 2    | 22.37 | 13.16 | 13.16 | tr H0VW34 H0VW34_CAVPO | Uncharacterized protein OS=Cavia porcellus<br>GN=NDUFC1 PE=4 SV=1              | CAVPO | 2  |
| 2687 | 2 | 2    | 7.965 | 7.965 | 7.965 | tr H0VX65 H0VX65_CAVPO | Uncharacterized protein OS=Cavia porcellus<br>GN=RNFB7 PE=4 SV=1               | CAVPO | 1  |
| 2688 | 2 | 2    | 12.04 | 12.04 | 12.04 | tr H0VXJ0 H0VXJ0_CAVPO | Peptidyl-prolyl cis-trans isomerase OS=Cavia<br>porcellus GN=FKBP1B PE=4 SV=1  | CAVPO | 1  |
| 2689 | 2 | 2    | 23.91 | 23.91 | 23.91 | tr H0VZA3 H0VZA3_CAVPO | Uncharacterized protein OS=Cavia porcellus<br>GN=DPM3 PE=4 SV=1                | CAVPO | 3  |

|      |   |      |       |       |       |                        |                                                                           |       |   |
|------|---|------|-------|-------|-------|------------------------|---------------------------------------------------------------------------|-------|---|
| 2690 | 2 | 2    | 5.699 | 5.699 | 5.699 | tr H0VZC7 H0VZC7_CAVPO | Uncharacterized protein (Fragment) OS=Cavia porcellus GN=WIBG PE=4 SV=1   | CAVPO | 1 |
| 2691 | 2 | 2    | 2.882 | 2.882 | 2.882 | tr H0VZP8 H0VZP8_CAVPO | Protein tweety homolog OS=Cavia porcellus GN=TTYH1 PE=3 SV=1              | CAVPO | 1 |
| 2692 | 2 | 2    | 4.286 | 4.286 | 4.286 | tr H0W0I5 H0W0I5_CAVPO | Uncharacterized protein (Fragment) OS=Cavia porcellus GN=EVL PE=4 SV=1    | CAVPO | 1 |
| 2693 | 2 | 2    | 2.57  | 2.57  | 2.57  | tr H0W1C9 H0W1C9_CAVPO | Uncharacterized protein OS=Cavia porcellus GN=DMAP1 PE=4 SV=1             | CAVPO | 1 |
| 2694 | 2 | 2.02 | 21.92 | 12.33 | 12.33 | tr H0W1K9 H0W1K9_CAVPO | Uncharacterized protein (Fragment) OS=Cavia porcellus GN=NDUFS7 PE=4 SV=1 | CAVPO | 1 |
| 2695 | 2 | 2    | 8.824 | 4.202 | 4.202 | tr H0W1T3 H0W1T3_CAVPO | Uncharacterized protein OS=Cavia porcellus GN=Bcl2 PE=4 SV=1              | CAVPO | 1 |
| 2696 | 2 | 2    | 19.57 | 19.57 | 19.57 | tr H0W255 H0W255_CAVPO | Uncharacterized protein OS=Cavia porcellus GN=RPL37A PE=3 SV=1            | CAVPO | 2 |
| 2697 | 2 | 4.11 | 22.4  | 22.4  | 22.4  | tr H0W268 H0W268_CAVPO | Uncharacterized protein OS=Cavia porcellus GN=Map1lc3b PE=3 SV=1          | CAVPO | 3 |
| 2698 | 2 | 2.1  | 18.97 | 10.92 | 4.023 | tr H0W2Q7 H0W2Q7_CAVPO | Uncharacterized protein OS=Cavia porcellus GN=TPRKB PE=3 SV=1             | CAVPO | 1 |
| 2699 | 2 | 2    | 27.91 | 27.91 | 27.91 | tr H0W2V7 H0W2V7_CAVPO | Uncharacterized protein OS=Cavia porcellus GN=NDUFA3 PE=4 SV=1            | CAVPO | 1 |
| 2700 | 2 | 2.53 | 21    | 13.5  | 10.5  | tr H0W3H4 H0W3H4_CAVPO | Uncharacterized protein OS=Cavia porcellus GN=LOC100726016 PE=4 SV=1      | CAVPO | 2 |
| 2701 | 2 | 2.01 | 18.13 | 18.13 | 18.13 | tr H0W4C5 H0W4C5_CAVPO | Uncharacterized protein OS=Cavia porcellus GN=TXN2 PE=4 SV=1              | CAVPO | 2 |
| 2702 | 2 | 2    | 4.783 | 4.783 | 4.783 | tr H0W5L6 H0W5L6_CAVPO | Uncharacterized protein (Fragment) OS=Cavia porcellus GN=SCAMP4 PE=4 SV=1 | CAVPO | 1 |
| 2703 | 2 | 2    | 8.553 | 8.553 | 8.553 | tr H0W5P1 H0W5P1_CAVPO | Uncharacterized protein OS=Cavia porcellus GN=PLP2 PE=4 SV=1              | CAVPO | 1 |

|      |   |      |       |       |       |                          |                                                                                |       |   |
|------|---|------|-------|-------|-------|--------------------------|--------------------------------------------------------------------------------|-------|---|
| 2704 | 2 | 2    | 6.593 | 2.747 | 2.747 | tr H0W6B7 H0W6B7_CAVPO   | Uncharacterized protein OS=Cavia porcellus<br>GN=SSBP4 PE=4 SV=1               | CAVPO | 1 |
| 2705 | 2 | 2    | 52.78 | 52.78 | 52.78 | tr H0W6V6 H0W6V6_CAVPO   | Uncharacterized protein OS=Cavia porcellus<br>GN=MARCKS PE=4 SV=1              | CAVPO | 1 |
| 2706 | 2 | 2    | 9.059 | 4.878 | 4.878 | tr H0W7C0 H0W7C0_CAVPO   | Uncharacterized protein OS=Cavia porcellus<br>GN=PHYHD1 PE=4 SV=1              | CAVPO | 1 |
| 2707 | 2 | 2    | 3.863 | 3.863 | 3.863 | tr H0W7N2 H0W7N2_CAVPO   | Uncharacterized protein OS=Cavia porcellus<br>GN=BCL2L1 PE=4 SV=1              | CAVPO | 1 |
| 2708 | 2 | 2    | 7.746 | 7.746 | 7.746 | tr H0W8R8 H0W8R8_CAVPO   | Uncharacterized protein OS=Cavia porcellus<br>GN=TXNL4A PE=4 SV=1              | CAVPO | 1 |
| 2709 | 2 | 2.03 | 36.51 | 25.4  | 25.4  | tr H0W9D8 H0W9D8_CAVPO   | Uncharacterized protein OS=Cavia porcellus<br>GN=COX17 PE=4 SV=1               | CAVPO | 1 |
| 2710 | 2 | 2    | 9.924 | 9.924 | 9.924 | tr H0W9K4 H0W9K4_CAVPO   | Uncharacterized protein (Fragment) OS=Cavia<br>porcellus GN=LEPROTL1 PE=4 SV=1 | CAVPO | 1 |
| 2711 | 2 | 2    | 1.518 | 1.518 | 1.518 | tr H0W AJ5 H0W AJ5_CAVPO | Uncharacterized protein OS=Cavia porcellus<br>GN=PDP1 PE=3 SV=1                | CAVPO | 1 |
| 2712 | 2 | 2.01 | 7.123 | 4.843 | 3.134 | tr H0WAV2 H0WAV2_CAVPO   | Uncharacterized protein OS=Cavia porcellus<br>PE=4 SV=1                        | CAVPO | 1 |
| 2713 | 2 | 2    | 12.02 | 12.02 | 12.02 | tr H0WB32 H0WB32_CAVPO   | Uncharacterized protein OS=Cavia porcellus<br>PE=3 SV=1                        | CAVPO | 2 |
| 2714 | 2 | 2.01 | 5.777 | 1.513 | 1.513 | tr H0WB76 H0WB76_CAVPO   | Uncharacterized protein OS=Cavia porcellus<br>GN=PLOD1 PE=4 SV=1               | CAVPO | 1 |
| 2715 | 2 | 2    | 6.599 | 6.599 | 6.599 | tr H0WCN0 H0WCN0_CAVPO   | Uncharacterized protein OS=Cavia porcellus<br>GN=C11orf73 PE=4 SV=1            | CAVPO | 1 |
| 2716 | 2 | 2    | 8.054 | 8.054 | 8.054 | tr H0WCP2 H0WCP2_CAVPO   | Uncharacterized protein OS=Cavia porcellus<br>GN=OSTC PE=4 SV=1                | CAVPO | 1 |
| 2717 | 2 | 2    | 8.667 | 8.667 | 8.667 | tr H0WDW3 H0WDW3_CAVPO   | Uncharacterized protein (Fragment) OS=Cavia<br>porcellus GN=MCFD2 PE=4 SV=1    | CAVPO | 1 |

|      |      |      |       |        |        |                        |                                                                                           |       |    |
|------|------|------|-------|--------|--------|------------------------|-------------------------------------------------------------------------------------------|-------|----|
| 2718 | 2    | 22.4 | 46.17 | 38.69  | 30.29  | tr Q0QF16 Q0QF16_CAVPO | Succinate dehydrogenase complex subunit A (Fragment) OS=Cavia porcellus GN=SDHA PE=2 SV=1 | CAVPO | 13 |
| 2719 | 2    | 15.8 | 60.77 | 60.22  | 50.83  | tr Q80XX5 Q80XX5_CAVPO | Protein gene product 9.5 (Fragment) OS=Cavia porcellus PE=2 SV=1                          | CAVPO | 12 |
| 2720 | 2    | 2    | 13.04 | 13.04  | 13.04  | tr Q9TEG4 Q9TEG4_CAVPO | NADH-ubiquinone oxidoreductase chain 3 (Fragment) OS=Cavia porcellus GN=NADH3 PE=3 SV=1   | CAVPO | 1  |
| 2721 | 2    | 2    | 3.448 | 3.448  | 3.448  | tr Q9TEG5 Q9TEG5_CAVPO | Cytochrome c oxidase subunit 3 (Fragment) OS=Cavia porcellus GN=COIII PE=3 SV=1           | CAVPO | 1  |
| 2722 | 1.98 | 2.07 | 8.918 | 2.778  | 1.754  | tr H0V5F1 H0V5F1_CAVPO | Uncharacterized protein OS=Cavia porcellus GN=EXOC7 PE=4 SV=1                             | CAVPO | 1  |
| 2723 | 1.97 | 2.02 | 8.464 | 3.135  | 3.135  | tr H0V3E0 H0V3E0_CAVPO | Uncharacterized protein OS=Cavia porcellus GN=COQ9 PE=4 SV=1                              | CAVPO | 1  |
| 2724 | 1.97 | 2.01 | 5.573 | 3.406  | 3.406  | tr H0V8X5 H0V8X5_CAVPO | Uncharacterized protein (Fragment) OS=Cavia porcellus GN=BABAM1 PE=4 SV=1                 | CAVPO | 1  |
| 2725 | 1.97 | 6.95 | 24.02 | 15.23  | 5.859  | tr H0VJS5 H0VJS5_CAVPO | Uncharacterized protein OS=Cavia porcellus GN=LYN PE=4 SV=1                               | CAVPO | 3  |
| 2726 | 1.97 | 2.06 | 15.69 | 10.04  | 1.883  | tr H0VTI4 H0VTI4_CAVPO | Uncharacterized protein OS=Cavia porcellus GN=AKT3 PE=4 SV=1                              | CAVPO | 1  |
| 2727 | 1.97 | 2.02 | 3.182 | 0.7486 | 0.7486 | tr H0W041 H0W041_CAVPO | Uncharacterized protein OS=Cavia porcellus GN=AHDC1 PE=4 SV=1                             | CAVPO | 1  |
| 2728 | 1.96 | 2    | 14.85 | 14.85  | 14.85  | tr H0V3G5 H0V3G5_CAVPO | Ubiquitin-related modifier 1 OS=Cavia porcellus GN=URM1 PE=1 SV=1                         | CAVPO | 1  |
| 2729 | 1.96 | 2    | 1.488 | 1.488  | 1.488  | tr H0VI62 H0VI62_CAVPO | Uncharacterized protein (Fragment) OS=Cavia porcellus GN=COLEC12 PE=4 SV=1                | CAVPO | 1  |
| 2730 | 1.96 | 2.28 | 11.34 | 4.193  | 3.416  | tr H0VT97 H0VT97_CAVPO | Uncharacterized protein (Fragment) OS=Cavia porcellus GN=WDR70 PE=4 SV=1                  | CAVPO | 2  |

|      |      |      |       |       |       |                        |                                                                             |       |   |
|------|------|------|-------|-------|-------|------------------------|-----------------------------------------------------------------------------|-------|---|
| 2731 | 1.96 | 2.16 | 8.199 | 3.297 | 2.367 | tr H0VTX6 H0VTX6_CAVPO | Uncharacterized protein OS=Cavia porcellus<br>GN=Gtf2a1l PE=4 SV=1          | CAVPO | 2 |
| 2732 | 1.96 | 2    | 4.197 | 1.825 | 1.825 | tr H0W011 H0W011_CAVPO | Uncharacterized protein OS=Cavia porcellus<br>GN=GPR108 PE=4 SV=1           | CAVPO | 1 |
| 2733 | 1.95 | 2.04 | 4.466 | 1.326 | 1.326 | tr H0V515 H0V515_CAVPO | Uncharacterized protein (Fragment) OS=Cavia<br>porcellus GN=RSF1 PE=4 SV=1  | CAVPO | 1 |
| 2734 | 1.95 | 2.07 | 17.09 | 14.55 | 6.909 | tr H0W4X6 H0W4X6_CAVPO | Uncharacterized protein OS=Cavia porcellus<br>GN=ROGDI PE=4 SV=1            | CAVPO | 1 |
| 2735 | 1.94 | 2.13 | 7.269 | 7.269 | 5.305 | tr H0V682 H0V682_CAVPO | Uncharacterized protein OS=Cavia porcellus<br>GN=MEF2D PE=3 SV=1            | CAVPO | 2 |
| 2736 | 1.93 | 2.08 | 5.948 | 4.833 | 4.833 | tr H0UT23 H0UT23_CAVPO | Uncharacterized protein OS=Cavia porcellus<br>GN=NAPRT1 PE=4 SV=1           | CAVPO | 2 |
| 2737 | 1.93 | 2.01 | 10.04 | 6.024 | 6.024 | tr H0UTC8 H0UTC8_CAVPO | Uncharacterized protein OS=Cavia porcellus<br>GN=TSPAN7 PE=4 SV=1           | CAVPO | 1 |
| 2738 | 1.93 | 2.09 | 6.566 | 4.377 | 4.377 | tr H0VB64 H0VB64_CAVPO | Uncharacterized protein (Fragment) OS=Cavia<br>porcellus GN=SNX9 PE=4 SV=1  | CAVPO | 2 |
| 2739 | 1.93 | 2.01 | 39.6  | 16.83 | 16.83 | tr H0VI67 H0VI67_CAVPO | Uncharacterized protein (Fragment) OS=Cavia<br>porcellus GN=ENY2 PE=3 SV=1  | CAVPO | 1 |
| 2740 | 1.92 | 4.06 | 8.866 | 8.866 | 4.824 | tr H0UYH6 H0UYH6_CAVPO | Uncharacterized protein OS=Cavia porcellus<br>GN=SEC23B PE=4 SV=1           | CAVPO | 4 |
| 2741 | 1.92 | 2    | 8.276 | 8.276 | 8.276 | tr H0V9R1 H0V9R1_CAVPO | Uncharacterized protein (Fragment) OS=Cavia<br>porcellus GN=LAGE3 PE=4 SV=1 | CAVPO | 1 |
| 2742 | 1.92 | 2    | 5.655 | 3.571 | 3.571 | tr H0VAF9 H0VAF9_CAVPO | Uncharacterized protein OS=Cavia porcellus<br>GN=PHYH PE=4 SV=1             | CAVPO | 1 |
| 2743 | 1.92 | 2    | 7.205 | 4.899 | 4.899 | tr H0VJT5 H0VJT5_CAVPO | Uncharacterized protein OS=Cavia porcellus<br>GN=HMG20A PE=4 SV=1           | CAVPO | 1 |
| 2744 | 1.92 | 2    | 8.333 | 8.333 | 8.333 | tr H0VLB7 H0VLB7_CAVPO | Uncharacterized protein (Fragment) OS=Cavia<br>porcellus GN=REEP1 PE=4 SV=1 | CAVPO | 1 |

|      |      |      |       |       |       |                        |                                                                               |       |    |
|------|------|------|-------|-------|-------|------------------------|-------------------------------------------------------------------------------|-------|----|
| 2745 | 1.92 | 6.22 | 29.44 | 18.57 | 6.897 | tr H0VMW3 H0VMW3_CAVPO | Uncharacterized protein OS=Cavia porcellus<br>GN=GNA13 PE=4 SV=1              | CAVPO | 3  |
| 2746 | 1.92 | 2.07 | 19.05 | 11.43 | 11.43 | tr H0W0T2 H0W0T2_CAVPO | Uncharacterized protein OS=Cavia porcellus<br>GN=EMC8 PE=4 SV=1               | CAVPO | 2  |
| 2747 | 1.91 | 3.93 | 32.48 | 18.47 | 10.19 | tr H0V0E2 H0V0E2_CAVPO | Uncharacterized protein (Fragment) OS=Cavia<br>porcellus GN=ARGLU1 PE=4 SV=1  | CAVPO | 2  |
| 2748 | 1.91 | 24.9 | 19.51 | 17.85 | 13.82 | tr H0V645 H0V645_CAVPO | Uncharacterized protein (Fragment) OS=Cavia<br>porcellus GN=ATP2B4 PE=4 SV=1  | CAVPO | 14 |
| 2749 | 1.91 | 1.98 | 6     | 2.2   | 2.2   | tr H0WBE1 H0WBE1_CAVPO | Uncharacterized protein OS=Cavia porcellus<br>GN=LOC100715321 PE=3 SV=1       | CAVPO | 1  |
| 2750 | 1.9  | 2.05 | 11.66 | 8.282 | 4.908 | tr H0VKS0 H0VKS0_CAVPO | Uncharacterized protein (Fragment) OS=Cavia<br>porcellus GN=USF2 PE=4 SV=1    | CAVPO | 1  |
| 2751 | 1.9  | 2.08 | 8.318 | 6.691 | 6.691 | tr H0VQI1 H0VQI1_CAVPO | Uncharacterized protein OS=Cavia porcellus<br>GN=GNS PE=3 SV=1                | CAVPO | 4  |
| 2752 | 1.89 | 1.99 | 5.514 | 3.759 | 3.759 | tr H0VEY3 H0VEY3_CAVPO | Uncharacterized protein OS=Cavia porcellus<br>GN=DAP3 PE=4 SV=1               | CAVPO | 1  |
| 2753 | 1.88 | 1.99 | 3.563 | 1.448 | 1.448 | tr H0VE90 H0VE90_CAVPO | Uncharacterized protein OS=Cavia porcellus<br>GN=EPS15 PE=4 SV=1              | CAVPO | 1  |
| 2754 | 1.88 | 2.08 | 9.905 | 8     | 4.381 | tr H0VPN1 H0VPN1_CAVPO | Uncharacterized protein (Fragment) OS=Cavia<br>porcellus GN=RPE65 PE=3 SV=1   | CAVPO | 2  |
| 2755 | 1.88 | 2.12 | 17.52 | 9.335 | 1.535 | tr H0W016 H0W016_CAVPO | Uncharacterized protein (Fragment) OS=Cavia<br>porcellus GN=VPS51 PE=4 SV=1   | CAVPO | 1  |
| 2756 | 1.87 | 1.97 | 27.36 | 14.62 | 9.434 | tr H0V326 H0V326_CAVPO | Uncharacterized protein OS=Cavia porcellus<br>GN=MED20 PE=4 SV=1              | CAVPO | 1  |
| 2757 | 1.87 | 1.98 | 8.554 | 4.684 | 4.684 | tr H0VB50 H0VB50_CAVPO | Uncharacterized protein (Fragment) OS=Cavia<br>porcellus GN=PLEKHO2 PE=4 SV=1 | CAVPO | 1  |
| 2758 | 1.86 | 2.03 | 7.568 | 6.119 | 3.704 | tr H0VB61 H0VB61_CAVPO | Uncharacterized protein OS=Cavia porcellus<br>GN=GPAA1 PE=4 SV=1              | CAVPO | 2  |



|      |      |      |       |       |       |                        |                                                                              |       |   |
|------|------|------|-------|-------|-------|------------------------|------------------------------------------------------------------------------|-------|---|
| 2759 | 1.86 | 2.09 | 7.174 | 4.636 | 1.049 | tr H0VS14 H0VS14_CAVPO | Uncharacterized protein OS=Cavia porcellus<br>GN=PLXNB2 PE=4 SV=1            | CAVPO | 1 |
| 2760 | 1.86 | 1.96 | 6.197 | 2.778 | 2.778 | tr H0W319 H0W319_CAVPO | Uncharacterized protein OS=Cavia porcellus<br>GN=SLC39A7 PE=4 SV=1           | CAVPO | 1 |
| 2761 | 1.85 | 2.07 | 10.55 | 10.55 | 5.275 | tr H0UZJ7 H0UZJ7_CAVPO | Uncharacterized protein OS=Cavia porcellus<br>GN=SCPEP1 PE=4 SV=1            | CAVPO | 2 |
| 2762 | 1.85 | 1.96 | 3.501 | 1.681 | 1.681 | tr H0V233 H0V233_CAVPO | Uncharacterized protein OS=Cavia porcellus<br>GN=CAPN1 PE=4 SV=1             | CAVPO | 1 |
| 2763 | 1.85 | 1.96 | 2.857 | 2.857 | 2.857 | tr H0VFI4 H0VFI4_CAVPO | Protein tweety homolog OS=Cavia porcellus<br>GN=Ttyh3 PE=3 SV=1              | CAVPO | 1 |
| 2764 | 1.85 | 2.01 | 6.773 | 3.984 | 3.984 | tr H0VG94 H0VG94_CAVPO | Uncharacterized protein OS=Cavia porcellus<br>GN=WASF3 PE=4 SV=1             | CAVPO | 2 |
| 2765 | 1.85 | 2    | 12.47 | 6.112 | 6.112 | tr H0VQH6 H0VQH6_CAVPO | Uncharacterized protein (Fragment) OS=Cavia<br>porcellus GN=Pcid2 PE=4 SV=1  | CAVPO | 2 |
| 2766 | 1.85 | 1.96 | 6.552 | 6.552 | 6.552 | tr H0VZ63 H0VZ63_CAVPO | Uncharacterized protein OS=Cavia porcellus<br>GN=Tmx2 PE=4 SV=1              | CAVPO | 1 |
| 2767 | 1.85 | 1.96 | 41.13 | 8.871 | 8.871 | tr H0W6C3 H0W6C3_CAVPO | Uncharacterized protein OS=Cavia porcellus<br>GN=LOC100729172 PE=4 SV=1      | CAVPO | 1 |
| 2768 | 1.85 | 1.96 | 13.82 | 13.82 | 13.82 | tr H0WDI3 H0WDI3_CAVPO | Uncharacterized protein (Fragment) OS=Cavia<br>porcellus PE=4 SV=1           | CAVPO | 1 |
| 2769 | 1.84 | 2    | 23.45 | 14.48 | 14.48 | tr H0UXL1 H0UXL1_CAVPO | Uncharacterized protein OS=Cavia porcellus<br>GN=TRAPPC1 PE=4 SV=1           | CAVPO | 2 |
| 2770 | 1.84 | 2.06 | 5.639 | 4.289 | 2.065 | tr H0UZK5 H0UZK5_CAVPO | Uncharacterized protein (Fragment) OS=Cavia<br>porcellus GN=SORBS1 PE=4 SV=1 | CAVPO | 2 |
| 2771 | 1.84 | 1.94 | 11.94 | 5.97  | 5.97  | tr H0VBH6 H0VBH6_CAVPO | Uncharacterized protein (Fragment) OS=Cavia<br>porcellus GN=NUBP2 PE=3 SV=1  | CAVPO | 1 |
| 2772 | 1.84 | 2    | 7.509 | 7.509 | 7.509 | tr H0VVR0 H0VVR0_CAVPO | Uncharacterized protein (Fragment) OS=Cavia<br>porcellus GN=QPRT PE=4 SV=1   | CAVPO | 2 |

|      |      |      |       |       |       |                        |                                                                              |       |   |
|------|------|------|-------|-------|-------|------------------------|------------------------------------------------------------------------------|-------|---|
| 2773 | 1.83 | 1.96 | 9.729 | 7.692 | 3.394 | tr H0VHJ0 H0VHJ0_CAVPO | Uncharacterized protein OS=Cavia porcellus<br>GN=PRRC1 PE=4 SV=1             | CAVPO | 1 |
| 2774 | 1.83 | 1.98 | 17.13 | 9.562 | 9.562 | tr H0VZW3 H0VZW3_CAVPO | Uncharacterized protein OS=Cavia porcellus<br>GN=C11orf68 PE=4 SV=1          | CAVPO | 2 |
| 2775 | 1.83 | 1.94 | 14.35 | 3.797 | 3.797 | tr H0W8X1 H0W8X1_CAVPO | Uncharacterized protein OS=Cavia porcellus<br>GN=NHEJ1 PE=4 SV=1             | CAVPO | 1 |
| 2776 | 1.82 | 1.98 | 5.684 | 4     | 4     | tr H0UXY7 H0UXY7_CAVPO | Uncharacterized protein OS=Cavia porcellus<br>GN=GABRG2 PE=3 SV=1            | CAVPO | 2 |
| 2777 | 1.82 | 1.98 | 10.84 | 7.74  | 7.74  | tr H0UYS9 H0UYS9_CAVPO | Uncharacterized protein OS=Cavia porcellus<br>GN=CACNG2 PE=4 SV=1            | CAVPO | 2 |
| 2778 | 1.82 | 1.91 | 18.01 | 18.01 | 13.66 | tr H0VA36 H0VA36_CAVPO | Uncharacterized protein (Fragment) OS=Cavia<br>porcellus GN=FAM96B PE=4 SV=1 | CAVPO | 1 |
| 2779 | 1.82 | 1.92 | 16.75 | 8.134 | 8.134 | tr H0WAT7 H0WAT7_CAVPO | Uncharacterized protein OS=Cavia porcellus<br>GN=LOC100720044 PE=4 SV=1      | CAVPO | 1 |
| 2780 | 1.82 | 1.92 | 10.53 | 10.53 | 10.53 | tr H0WCB1 H0WCB1_CAVPO | Uncharacterized protein OS=Cavia porcellus<br>GN=CYSTM1 PE=4 SV=1            | CAVPO | 1 |
| 2781 | 1.81 | 4.16 | 19.21 | 8.884 | 8.884 | tr H0V8W0 H0V8W0_CAVPO | Oxysterol-binding protein OS=Cavia porcellus<br>GN=OSBPL2 PE=3 SV=1          | CAVPO | 3 |
| 2782 | 1.81 | 1.98 | 10.43 | 5.298 | 5.298 | tr H0VFF6 H0VFF6_CAVPO | Uncharacterized protein OS=Cavia porcellus<br>GN=Scg2 PE=4 SV=1              | CAVPO | 2 |
| 2783 | 1.8  | 1.91 | 9.47  | 6.421 | 2.889 | tr H0UVU0 H0UVU0_CAVPO | Uncharacterized protein OS=Cavia porcellus<br>GN=KIAA1467 PE=4 SV=1          | CAVPO | 1 |
| 2784 | 1.8  | 1.89 | 8.547 | 8.547 | 8.547 | tr H0UW44 H0UW44_CAVPO | Uncharacterized protein OS=Cavia porcellus<br>GN=POLR2J PE=4 SV=1            | CAVPO | 1 |
| 2785 | 1.8  | 1.89 | 6.355 | 4.013 | 4.013 | tr H0UWT5 H0UWT5_CAVPO | Uncharacterized protein OS=Cavia porcellus<br>GN=GGPS1 PE=3 SV=1             | CAVPO | 1 |
| 2786 | 1.8  | 2.18 | 4.826 | 3.475 | 2.317 | tr H0UZ06 H0UZ06_CAVPO | Uncharacterized protein OS=Cavia porcellus<br>GN=VEZF1 PE=4 SV=1             | CAVPO | 1 |

|      |      |      |       |       |       |                        |                                                                           |       |   |
|------|------|------|-------|-------|-------|------------------------|---------------------------------------------------------------------------|-------|---|
| 2787 | 1.8  | 4.4  | 13.72 | 7.337 | 4.212 | tr H0VV11 H0VV11_CAVPO | Protein kinase C epsilon type OS=Cavia porcellus GN=PRKCE PE=3 SV=1       | CAVPO | 3 |
| 2788 | 1.8  | 1.9  | 4.871 | 3.152 | 3.152 | tr H0VZQ8 H0VZQ8_CAVPO | Uncharacterized protein (Fragment) OS=Cavia porcellus PE=4 SV=1           | CAVPO | 1 |
| 2789 | 1.8  | 1.89 | 12.93 | 3.155 | 3.155 | tr H0W151 H0W151_CAVPO | Uncharacterized protein (Fragment) OS=Cavia porcellus GN=IGLON5 PE=4 SV=1 | CAVPO | 1 |
| 2790 | 1.79 | 12.1 | 57.05 | 42.95 | 29.53 | tr H0VQP0 H0VQP0_CAVPO | Uncharacterized protein OS=Cavia porcellus GN=CALML3 PE=4 SV=1            | CAVPO | 7 |
| 2791 | 1.79 | 1.92 | 7.9   | 3.95  | 1.351 | tr H0VRE9 H0VRE9_CAVPO | Uncharacterized protein OS=Cavia porcellus GN=ARVCF PE=4 SV=1             | CAVPO | 1 |
| 2792 | 1.79 | 1.87 | 14.85 | 6.931 | 6.931 | tr H0VRY6 H0VRY6_CAVPO | Uncharacterized protein OS=Cavia porcellus GN=ISOC2 PE=4 SV=1             | CAVPO | 1 |
| 2793 | 1.78 | 1.87 | 51.85 | 38.89 | 20.37 | tr H0V106 H0V106_CAVPO | Uncharacterized protein OS=Cavia porcellus GN=RPS29 PE=4 SV=1             | CAVPO | 1 |
| 2794 | 1.78 | 1.94 | 11.53 | 11.53 | 4.511 | tr H0VA04 H0VA04_CAVPO | Uncharacterized protein OS=Cavia porcellus GN=SEC62 PE=4 SV=1             | CAVPO | 2 |
| 2795 | 1.78 | 1.9  | 6.901 | 3.125 | 1.563 | tr H0VC04 H0VC04_CAVPO | Uncharacterized protein (Fragment) OS=Cavia porcellus GN=PDE8A PE=4 SV=1  | CAVPO | 1 |
| 2796 | 1.78 | 2.05 | 11.14 | 11.14 | 4.106 | tr H0VCF9 H0VCF9_CAVPO | Uncharacterized protein OS=Cavia porcellus GN=THOC6 PE=4 SV=1             | CAVPO | 1 |
| 2797 | 1.77 | 1.91 | 3.896 | 2.381 | 1.19  | tr H0V195 H0V195_CAVPO | Uncharacterized protein OS=Cavia porcellus GN=EXOC2 PE=4 SV=1             | CAVPO | 1 |
| 2798 | 1.77 | 4.12 | 8.893 | 4.53  | 2.349 | tr H0VKQ9 H0VKQ9_CAVPO | Uncharacterized protein OS=Cavia porcellus GN=PKP4 PE=4 SV=1              | CAVPO | 2 |
| 2799 | 1.77 | 1.96 | 14.12 | 14.12 | 3.435 | tr H0VYG6 H0VYG6_CAVPO | Uncharacterized protein OS=Cavia porcellus GN=CA13 PE=4 SV=1              | CAVPO | 1 |
| 2800 | 1.76 | 2.88 | 18.72 | 6.828 | 3.965 | tr H0V3R7 H0V3R7_CAVPO | Uncharacterized protein OS=Cavia porcellus GN=GABPA PE=3 SV=1             | CAVPO | 2 |

|      |      |      |       |       |       |                        |                                                                               |       |   |
|------|------|------|-------|-------|-------|------------------------|-------------------------------------------------------------------------------|-------|---|
| 2801 | 1.76 | 1.9  | 27.61 | 12.88 | 7.362 | tr H0VJ39 H0VJ39_CAVPO | Uncharacterized protein OS=Cavia porcellus<br>GN=ARL2BP PE=4 SV=1             | CAVPO | 1 |
| 2802 | 1.74 | 1.87 | 47.37 | 47.37 | 47.37 | tr H0VI06 H0VI06_CAVPO | Uncharacterized protein OS=Cavia porcellus<br>GN=PKIA PE=4 SV=1               | CAVPO | 2 |
| 2803 | 1.74 | 1.88 | 18.26 | 8.982 | 4.79  | tr H0VLZ2 H0VLZ2_CAVPO | Uncharacterized protein (Fragment) OS=Cavia<br>porcellus GN=GRHPR PE=3 SV=1   | CAVPO | 1 |
| 2804 | 1.74 | 1.82 | 4.036 | 1.495 | 1.495 | tr H0VNU2 H0VNU2_CAVPO | Uncharacterized protein OS=Cavia porcellus<br>GN=DYM PE=4 SV=1                | CAVPO | 1 |
| 2805 | 1.73 | 1.86 | 8.108 | 2.838 | 1.486 | tr H0UZ14 H0UZ14_CAVPO | Uncharacterized protein (Fragment) OS=Cavia<br>porcellus GN=PAPOLA PE=4 SV=1  | CAVPO | 1 |
| 2806 | 1.72 | 1.97 | 18.32 | 11.82 | 3.767 | tr H0V429 H0V429_CAVPO | Uncharacterized protein OS=Cavia porcellus<br>GN=EPN2 PE=4 SV=1               | CAVPO | 2 |
| 2807 | 1.72 | 1.8  | 2.693 | 2.693 | 2.693 | tr H0VKE4 H0VKE4_CAVPO | Uncharacterized protein (Fragment) OS=Cavia<br>porcellus GN=SLC24A3 PE=4 SV=1 | CAVPO | 1 |
| 2808 | 1.72 | 8.55 | 28.84 | 28.84 | 28.84 | tr H0W6H9 H0W6H9_CAVPO | Uncharacterized protein OS=Cavia porcellus<br>GN=HIST1H1A PE=3 SV=1           | CAVPO | 6 |
| 2809 | 1.72 | 1.82 | 22.87 | 13.83 | 13.83 | tr H0W843 H0W843_CAVPO | 60S ribosomal protein L18 (Fragment)<br>OS=Cavia porcellus GN=RPL18 PE=3 SV=1 | CAVPO | 2 |
| 2810 | 1.7  | 1.8  | 2.759 | 2.759 | 2.759 | tr H0VEG0 H0VEG0_CAVPO | Uncharacterized protein (Fragment) OS=Cavia<br>porcellus GN=GLOD4 PE=4 SV=1   | CAVPO | 1 |
| 2811 | 1.7  | 1.8  | 6.587 | 4.192 | 4.192 | tr H0VKS4 H0VKS4_CAVPO | Uncharacterized protein OS=Cavia porcellus<br>GN=RDH13 PE=3 SV=1              | CAVPO | 1 |
| 2812 | 1.69 | 1.84 | 10.57 | 6.857 | 2.857 | tr H0VAF4 H0VAF4_CAVPO | Uncharacterized protein OS=Cavia porcellus<br>GN=RP2 PE=4 SV=1                | CAVPO | 1 |
| 2813 | 1.69 | 1.79 | 11.62 | 5.808 | 3.03  | tr H0VCQ9 H0VCQ9_CAVPO | Uncharacterized protein (Fragment) OS=Cavia<br>porcellus GN=C9orf41 PE=4 SV=1 | CAVPO | 1 |
| 2814 | 1.69 | 2.01 | 6.289 | 5.464 | 2.371 | tr H0W4M4 H0W4M4_CAVPO | Uncharacterized protein OS=Cavia porcellus<br>GN=Slc8a1 PE=4 SV=1             | CAVPO | 2 |

|      |      |      |       |       |        |                        |                                                                              |       |   |
|------|------|------|-------|-------|--------|------------------------|------------------------------------------------------------------------------|-------|---|
| 2815 | 1.68 | 1.79 | 12.67 | 1.811 | 1.811  | tr H0UTI1 H0UTI1_CAVPO | Uncharacterized protein OS=Cavia porcellus<br>GN=HOOK3 PE=4 SV=1             | CAVPO | 1 |
| 2816 | 1.68 | 1.75 | 3.623 | 1.863 | 1.863  | tr H0UYY7 H0UYY7_CAVPO | Uncharacterized protein OS=Cavia porcellus<br>GN=CTDP1 PE=4 SV=1             | CAVPO | 1 |
| 2817 | 1.68 | 1.84 | 15.53 | 11.17 | 5.722  | tr H0V5M3 H0V5M3_CAVPO | Uncharacterized protein OS=Cavia porcellus<br>GN=PCYT1A PE=4 SV=1            | CAVPO | 1 |
| 2818 | 1.68 | 1.77 | 3.969 | 1.639 | 0.9491 | tr H0VDJ2 H0VDJ2_CAVPO | Uncharacterized protein OS=Cavia porcellus<br>GN=HDAC6 PE=4 SV=1             | CAVPO | 1 |
| 2819 | 1.68 | 1.77 | 12.9  | 6.989 | 6.989  | tr H0W4A3 H0W4A3_CAVPO | Uncharacterized protein (Fragment) OS=Cavia<br>porcellus GN=MEA1 PE=4 SV=1   | CAVPO | 1 |
| 2820 | 1.68 | 1.78 | 4.305 | 2.152 | 2.152  | tr H0W9B1 H0W9B1_CAVPO | Uncharacterized protein (Fragment) OS=Cavia<br>porcellus GN=SEMA7A PE=4 SV=1 | CAVPO | 1 |
| 2821 | 1.67 | 1.76 | 12.97 | 3.956 | 3.956  | tr H0UXD5 H0UXD5_CAVPO | Uncharacterized protein OS=Cavia porcellus<br>GN=DDX47 PE=3 SV=1             | CAVPO | 1 |
| 2822 | 1.67 | 1.76 | 9.717 | 5.668 | 5.668  | tr H0VIP7 H0VIP7_CAVPO | Uncharacterized protein OS=Cavia porcellus<br>GN=TIMM21 PE=4 SV=1            | CAVPO | 1 |
| 2823 | 1.67 | 1.91 | 6.781 | 4.82  | 1.062  | tr H0VZ04 H0VZ04_CAVPO | Uncharacterized protein OS=Cavia porcellus<br>GN=PPP1R9B PE=4 SV=1           | CAVPO | 1 |
| 2824 | 1.66 | 1.84 | 5     | 4.327 | 3.462  | tr H0UUN3 H0UUN3_CAVPO | Uncharacterized protein OS=Cavia porcellus<br>GN=IPO9 PE=4 SV=1              | CAVPO | 2 |
| 2825 | 1.66 | 1.82 | 12.83 | 7.965 | 4.867  | tr H0VLM2 H0VLM2_CAVPO | Uncharacterized protein OS=Cavia porcellus<br>GN=Ilk PE=4 SV=1               | CAVPO | 2 |
| 2826 | 1.66 | 1.76 | 9.333 | 3.238 | 3.238  | tr H0VR41 H0VR41_CAVPO | Uncharacterized protein OS=Cavia porcellus<br>GN=FBXO7 PE=4 SV=1             | CAVPO | 1 |
| 2827 | 1.66 | 1.76 | 15.66 | 15.66 | 8.434  | tr H0VRN7 H0VRN7_CAVPO | Uncharacterized protein OS=Cavia porcellus<br>GN=MRPL49 PE=4 SV=1            | CAVPO | 1 |
| 2828 | 1.66 | 1.74 | 4.494 | 4.494 | 4.494  | tr H0VV44 H0VV44_CAVPO | Proteasome assembly chaperone 2 OS=Cavia<br>porcellus GN=PSMG2 PE=3 SV=1     | CAVPO | 1 |

|      |      |      |       |        |        |                        |                                                                               |       |   |
|------|------|------|-------|--------|--------|------------------------|-------------------------------------------------------------------------------|-------|---|
| 2829 | 1.66 | 1.74 | 5.338 | 5.338  | 5.338  | tr H0VV49 H0VV49_CAVPO | Uncharacterized protein OS=Cavia porcellus<br>GN=WBSCR22 PE=4 SV=1            | CAVPO | 1 |
| 2830 | 1.65 | 1.81 | 8.087 | 6.065  | 4.51   | tr H0V2U3 H0V2U3_CAVPO | Uncharacterized protein (Fragment) OS=Cavia<br>porcellus GN=CAPN5 PE=4 SV=1   | CAVPO | 2 |
| 2831 | 1.65 | 1.78 | 7.494 | 2.685  | 1.342  | tr H0V305 H0V305_CAVPO | Phosphatidylinositol 3-kinase OS=Cavia<br>porcellus GN=PIK3C3 PE=3 SV=1       | CAVPO | 1 |
| 2832 | 1.65 | 1.76 | 6.567 | 4.925  | 2.985  | tr H0VHH6 H0VHH6_CAVPO | Uncharacterized protein (Fragment) OS=Cavia<br>porcellus GN=ABCB7 PE=3 SV=1   | CAVPO | 1 |
| 2833 | 1.65 | 1.74 | 7.895 | 4.386  | 4.386  | tr H0VQX0 H0VQX0_CAVPO | Uncharacterized protein OS=Cavia porcellus<br>GN=CCDC97 PE=4 SV=1             | CAVPO | 1 |
| 2834 | 1.65 | 1.75 | 11.22 | 6.341  | 6.341  | tr H0WAM5 H0WAM5_CAVPO | Uncharacterized protein (Fragment) OS=Cavia<br>porcellus GN=RBFOX2 PE=4 SV=1  | CAVPO | 1 |
| 2835 | 1.64 | 1.75 | 14.76 | 7.619  | 2.381  | tr H0UXE0 H0UXE0_CAVPO | Uncharacterized protein OS=Cavia porcellus<br>GN=RBM22 PE=4 SV=1              | CAVPO | 1 |
| 2836 | 1.64 | 1.78 | 10.81 | 7.143  | 1.832  | tr H0V1K8 H0V1K8_CAVPO | Uncharacterized protein OS=Cavia porcellus<br>GN=ELP3 PE=4 SV=1               | CAVPO | 1 |
| 2837 | 1.64 | 1.75 | 1.655 | 0.5079 | 0.1966 | tr H0V266 H0V266_CAVPO | Uncharacterized protein (Fragment) OS=Cavia<br>porcellus GN=GPR98 PE=4 SV=1   | CAVPO | 1 |
| 2838 | 1.64 | 1.81 | 3.122 | 2.153  | 1.292  | tr H0V6N3 H0V6N3_CAVPO | Uncharacterized protein OS=Cavia porcellus<br>GN=PIGN PE=4 SV=1               | CAVPO | 1 |
| 2839 | 1.64 | 1.82 | 1.683 | 0.6731 | 0.3846 | tr H0VPW4 H0VPW4_CAVPO | Uncharacterized protein OS=Cavia porcellus<br>GN=RALGAP1 PE=4 SV=1            | CAVPO | 1 |
| 2840 | 1.63 | 1.73 | 3.477 | 1.987  | 1.987  | tr H0V8J8 H0V8J8_CAVPO | Uncharacterized protein (Fragment) OS=Cavia<br>porcellus GN=LRRFIP1 PE=4 SV=1 | CAVPO | 1 |
| 2841 | 1.63 | 1.71 | 20.47 | 5.848  | 5.848  | tr H0VN21 H0VN21_CAVPO | Uncharacterized protein (Fragment) OS=Cavia<br>porcellus GN=SPRYD7 PE=4 SV=1  | CAVPO | 1 |
| 2842 | 1.62 | 3.61 | 8.987 | 5.163  | 5.163  | tr H0VI87 H0VI87_CAVPO | Uncharacterized protein (Fragment) OS=Cavia<br>porcellus GN=TXNRD2 PE=3 SV=1  | CAVPO | 2 |

|      |      |      |       |        |        |                        |                                                                               |       |   |
|------|------|------|-------|--------|--------|------------------------|-------------------------------------------------------------------------------|-------|---|
| 2843 | 1.62 | 1.79 | 16.88 | 5.928  | 3.866  | tr H0W0H3 H0W0H3_CAVPO | Uncharacterized protein OS=Cavia porcellus<br>GN=CUL1 PE=3 SV=1               | CAVPO | 2 |
| 2844 | 1.62 | 1.72 | 5.534 | 4.743  | 4.743  | tr H0W3V2 H0W3V2_CAVPO | Uncharacterized protein (Fragment) OS=Cavia<br>porcellus GN=TMUB1 PE=4 SV=1   | CAVPO | 1 |
| 2845 | 1.61 | 1.88 | 23.44 | 18.1   | 4.748  | tr H0UWI9 H0UWI9_CAVPO | Uncharacterized protein OS=Cavia porcellus<br>GN=ABHD6 PE=4 SV=1              | CAVPO | 1 |
| 2846 | 1.61 | 3.83 | 25.35 | 18.78  | 12.68  | tr H0VHL4 H0VHL4_CAVPO | Uncharacterized protein OS=Cavia porcellus<br>GN=RAB39B PE=3 SV=1             | CAVPO | 4 |
| 2847 | 1.6  | 1.7  | 2.913 | 0.9015 | 0.9015 | tr H0UVH5 H0UVH5_CAVPO | Uncharacterized protein OS=Cavia porcellus<br>GN=NCOA1 PE=4 SV=1              | CAVPO | 1 |
| 2848 | 1.6  | 1.88 | 27.5  | 20.83  | 5.417  | tr H0V2B4 H0V2B4_CAVPO | Uncharacterized protein OS=Cavia porcellus<br>GN=GSTT1 PE=3 SV=1              | CAVPO | 1 |
| 2849 | 1.6  | 1.78 | 9.747 | 5.316  | 4.304  | tr H0V2C9 H0V2C9_CAVPO | Uncharacterized protein (Fragment) OS=Cavia<br>porcellus GN=AGAP3 PE=4 SV=1   | CAVPO | 2 |
| 2850 | 1.6  | 1.75 | 5.33  | 3.303  | 1.652  | tr H0V6K7 H0V6K7_CAVPO | Uncharacterized protein OS=Cavia porcellus<br>GN=IKBKAP PE=4 SV=1             | CAVPO | 1 |
| 2851 | 1.6  | 1.7  | 20.29 | 10.14  | 10.14  | tr H0VRH7 H0VRH7_CAVPO | Uncharacterized protein OS=Cavia porcellus<br>GN=GOLT1B PE=4 SV=1             | CAVPO | 1 |
| 2852 | 1.6  | 1.68 | 2.302 | 2.302  | 2.302  | tr H0VSP7 H0VSP7_CAVPO | Uncharacterized protein (Fragment) OS=Cavia<br>porcellus GN=SP4 PE=4 SV=1     | CAVPO | 1 |
| 2853 | 1.6  | 1.72 | 11.72 | 2.241  | 2.241  | tr H0VTD7 H0VTD7_CAVPO | Uncharacterized protein OS=Cavia porcellus<br>GN=NELFB PE=4 SV=1              | CAVPO | 1 |
| 2854 | 1.6  | 1.73 | 4.732 | 2.681  | 1.42   | tr H0VU96 H0VU96_CAVPO | Uncharacterized protein OS=Cavia porcellus<br>GN=KLHL22 PE=4 SV=1             | CAVPO | 1 |
| 2855 | 1.59 | 1.69 | 5.045 | 1.141  | 0.7207 | tr H0V0H5 H0V0H5_CAVPO | Uncharacterized protein (Fragment) OS=Cavia<br>porcellus GN=Ankrd26 PE=4 SV=1 | CAVPO | 1 |
| 2856 | 1.59 | 1.68 | 2.128 | 2.128  | 2.128  | tr H0V8K1 H0V8K1_CAVPO | Uncharacterized protein OS=Cavia porcellus<br>GN=DAXX PE=4 SV=1               | CAVPO | 1 |

|      |      |      |       |       |       |                        |                                                                                 |       |   |
|------|------|------|-------|-------|-------|------------------------|---------------------------------------------------------------------------------|-------|---|
| 2857 | 1.59 | 1.74 | 4.332 | 4.332 | 4.332 | tr H0W643 H0W643_CAVPO | Uncharacterized protein (Fragment) OS=Cavia porcellus GN=C20orf112 PE=4 SV=1    | CAVPO | 2 |
| 2858 | 1.59 | 1.71 | 6.988 | 4.337 | 2.41  | tr H0WCZ4 H0WCZ4_CAVPO | Uncharacterized protein OS=Cavia porcellus GN=CSNK1G2 PE=3 SV=1                 | CAVPO | 1 |
| 2859 | 1.58 | 1.76 | 8.25  | 4.771 | 1.193 | tr H0VMT6 H0VMT6_CAVPO | DNA ligase OS=Cavia porcellus GN=LIG3 PE=3 SV=1                                 | CAVPO | 1 |
| 2860 | 1.57 | 1.66 | 5.512 | 5.512 | 5.512 | tr H0UU18 H0UU18_CAVPO | Uncharacterized protein OS=Cavia porcellus GN=ETHE1 PE=4 SV=1                   | CAVPO | 1 |
| 2861 | 1.57 | 1.65 | 7.194 | 1.871 | 1.871 | tr H0UZF7 H0UZF7_CAVPO | Uncharacterized protein OS=Cavia porcellus GN=NUFIP2 PE=4 SV=1                  | CAVPO | 1 |
| 2862 | 1.57 | 1.65 | 2.628 | 1.445 | 1.445 | tr H0V7H6 H0V7H6_CAVPO | Uncharacterized protein (Fragment) OS=Cavia porcellus GN=LOC100729034 PE=4 SV=1 | CAVPO | 1 |
| 2863 | 1.57 | 6.6  | 32.57 | 21.56 | 21.56 | tr H0VQQ4 H0VQQ4_CAVPO | Uncharacterized protein OS=Cavia porcellus GN=RAB4A PE=3 SV=1                   | CAVPO | 6 |
| 2864 | 1.57 | 1.76 | 7.468 | 5.519 | 3.571 | tr H0VYF3 H0VYF3_CAVPO | Uncharacterized protein OS=Cavia porcellus GN=RTFDC1 PE=4 SV=1                  | CAVPO | 1 |
| 2865 | 1.57 | 1.64 | 9.79  | 7.692 | 7.692 | tr H0W2M3 H0W2M3_CAVPO | Uncharacterized protein (Fragment) OS=Cavia porcellus GN=Rps23 PE=3 SV=1        | CAVPO | 1 |
| 2866 | 1.57 | 1.64 | 7.258 | 7.258 | 7.258 | tr H0W8Q0 H0W8Q0_CAVPO | Uncharacterized protein (Fragment) OS=Cavia porcellus GN=FDX1 PE=4 SV=1         | CAVPO | 1 |
| 2867 | 1.55 | 1.69 | 19.77 | 13.95 | 5.426 | tr H0V061 H0V061_CAVPO | Uncharacterized protein OS=Cavia porcellus GN=SNAP29 PE=4 SV=1                  | CAVPO | 1 |
| 2868 | 1.55 | 1.72 | 16.98 | 10.61 | 2.918 | tr H0V3Y0 H0V3Y0_CAVPO | Uncharacterized protein OS=Cavia porcellus GN=Nck1 PE=4 SV=1                    | CAVPO | 1 |
| 2869 | 1.54 | 1.62 | 4.633 | 4.633 | 4.633 | tr H0V0E8 H0V0E8_CAVPO | Uncharacterized protein (Fragment) OS=Cavia porcellus GN=SCD5 PE=3 SV=1         | CAVPO | 1 |
| 2870 | 1.54 | 1.63 | 3.046 | 1.32  | 1.32  | tr H0VF52 H0VF52_CAVPO | Alanine--tRNA ligase, cytoplasmic OS=Cavia porcellus GN=AARS2 PE=3 SV=1         | CAVPO | 1 |



|      |      |      |       |       |       |                        |                                                                                |       |   |
|------|------|------|-------|-------|-------|------------------------|--------------------------------------------------------------------------------|-------|---|
| 2871 | 1.54 | 1.63 | 42.47 | 42.47 | 42.47 | tr H0W113 H0W113_CAVPO | Uncharacterized protein OS=Cavia porcellus<br>GN=HOPX PE=3 SV=1                | CAVPO | 2 |
| 2872 | 1.53 | 1.7  | 9.873 | 9.873 | 1.592 | tr H0VP15 H0VP15_CAVPO | Uncharacterized protein OS=Cavia porcellus<br>GN=BCAM PE=4 SV=1                | CAVPO | 1 |
| 2873 | 1.52 | 1.69 | 8.761 | 8.761 | 6.344 | tr H0UUF1 H0UUF1_CAVPO | Uncharacterized protein (Fragment) OS=Cavia<br>porcellus GN=RABGGTB PE=4 SV=1  | CAVPO | 2 |
| 2874 | 1.52 | 1.65 | 12.71 | 12.71 | 9.322 | tr H0UVY3 H0UVY3_CAVPO | Uncharacterized protein OS=Cavia porcellus<br>GN=YIPF6 PE=4 SV=1               | CAVPO | 2 |
| 2875 | 1.52 | 1.6  | 18.52 | 18.52 | 12.96 | tr H0UW76 H0UW76_CAVPO | Uncharacterized protein (Fragment) OS=Cavia<br>porcellus GN=SH3BGRL2 PE=4 SV=1 | CAVPO | 1 |
| 2876 | 1.52 | 1.71 | 9.171 | 2.099 | 1.105 | tr H0V9H5 H0V9H5_CAVPO | Uncharacterized protein OS=Cavia porcellus<br>GN=CNTR0B PE=4 SV=1              | CAVPO | 1 |
| 2877 | 1.52 | 1.6  | 4.933 | 4.933 | 4.933 | tr H0VYU9 H0VYU9_CAVPO | Uncharacterized protein OS=Cavia porcellus<br>GN=NTMT1 PE=4 SV=1               | CAVPO | 1 |
| 2878 | 1.52 | 1.66 | 33.64 | 20    | 20    | tr H0W915 H0W915_CAVPO | Parvalbumin alpha OS=Cavia porcellus<br>GN=PVALB PE=4 SV=1                     | CAVPO | 2 |
| 2879 | 1.51 | 1.61 | 8.664 | 8.664 | 3.249 | tr H0V9C3 H0V9C3_CAVPO | Uncharacterized protein OS=Cavia porcellus<br>GN=RSU1 PE=4 SV=1                | CAVPO | 1 |
| 2880 | 1.51 | 1.59 | 6.452 | 6.452 | 6.452 | tr H0VSR1 H0VSR1_CAVPO | Uncharacterized protein OS=Cavia porcellus<br>GN=CA6 PE=4 SV=1                 | CAVPO | 1 |
| 2881 | 1.51 | 1.72 | 12.4  | 8.527 | 5.426 | tr H0W400 H0W400_CAVPO | Uncharacterized protein OS=Cavia porcellus<br>GN=SNF8 PE=4 SV=1                | CAVPO | 1 |
| 2882 | 1.51 | 1.59 | 21.21 | 21.21 | 21.21 | tr H0W6X9 H0W6X9_CAVPO | Uncharacterized protein (Fragment) OS=Cavia<br>porcellus GN=FXYD1 PE=4 SV=1    | CAVPO | 1 |
| 2883 | 1.5  | 1.64 | 12.08 | 6.144 | 1.059 | tr H0UWZ9 H0UWZ9_CAVPO | Uncharacterized protein OS=Cavia porcellus<br>GN=UNC45A PE=4 SV=1              | CAVPO | 1 |
| 2884 | 1.5  | 2.5  | 14.69 | 7.992 | 4.695 | tr H0V4Z3 H0V4Z3_CAVPO | Uncharacterized protein OS=Cavia porcellus<br>GN=RNF40 PE=4 SV=1               | CAVPO | 3 |

|      |      |      |       |        |        |                        |                                                                          |       |   |
|------|------|------|-------|--------|--------|------------------------|--------------------------------------------------------------------------|-------|---|
| 2885 | 1.5  | 1.61 | 7.714 | 3.226  | 1.683  | tr H0VXQ9 H0VXQ9_CAVPO | Uncharacterized protein (Fragment) OS=Cavia porcellus GN=BRSK2 PE=4 SV=1 | CAVPO | 1 |
| 2886 | 1.49 | 1.59 | 4.14  | 4.14   | 4.14   | tr H0UUP1 H0UUP1_CAVPO | Uncharacterized protein (Fragment) OS=Cavia porcellus GN=Rdh10 PE=3 SV=1 | CAVPO | 1 |
| 2887 | 1.49 | 1.59 | 7.077 | 7.077  | 4.308  | tr H0UWL4 H0UWL4_CAVPO | Uncharacterized protein OS=Cavia porcellus GN=TMED8 PE=4 SV=1            | CAVPO | 1 |
| 2888 | 1.49 | 1.58 | 5.642 | 0.7052 | 0.7052 | tr H0VBM3 H0VBM3_CAVPO | Uncharacterized protein (Fragment) OS=Cavia porcellus GN=UACA PE=4 SV=1  | CAVPO | 1 |
| 2889 | 1.49 | 1.58 | 2.259 | 1.335  | 1.335  | tr H0VCC6 H0VCC6_CAVPO | Uncharacterized protein OS=Cavia porcellus GN=PITPNM3 PE=4 SV=1          | CAVPO | 1 |
| 2890 | 1.49 | 1.65 | 8.601 | 5.248  | 3.936  | tr H0VF84 H0VF84_CAVPO | Uncharacterized protein OS=Cavia porcellus GN=AKAP8 PE=4 SV=1            | CAVPO | 2 |
| 2891 | 1.49 | 1.59 | 10.44 | 4.016  | 4.016  | tr H0VL55 H0VL55_CAVPO | Uncharacterized protein OS=Cavia porcellus GN=ING4 PE=4 SV=1             | CAVPO | 1 |
| 2892 | 1.49 | 1.58 | 7.338 | 2.725  | 2.725  | tr H0VLF6 H0VLF6_CAVPO | Uncharacterized protein (Fragment) OS=Cavia porcellus GN=NRBP2 PE=4 SV=1 | CAVPO | 1 |
| 2893 | 1.49 | 1.57 | 9.091 | 9.091  | 9.091  | tr H0VQ57 H0VQ57_CAVPO | Uncharacterized protein OS=Cavia porcellus GN=Fabp7 PE=3 SV=1            | CAVPO | 1 |
| 2894 | 1.49 | 1.73 | 23.79 | 10.13  | 3.524  | tr H0VWJ1 H0VWJ1_CAVPO | Uncharacterized protein OS=Cavia porcellus GN=LOC100714943 PE=4 SV=1     | CAVPO | 1 |
| 2895 | 1.48 | 1.62 | 1.766 | 0.9566 | 0.9566 | tr H0V6H9 H0V6H9_CAVPO | Uncharacterized protein OS=Cavia porcellus GN=KIAA1462 PE=4 SV=1         | CAVPO | 2 |
| 2896 | 1.48 | 1.65 | 17.78 | 17.78  | 11.67  | tr H0VCL1 H0VCL1_CAVPO | Uncharacterized protein OS=Cavia porcellus GN=SPCS3 PE=4 SV=1            | CAVPO | 2 |
| 2897 | 1.48 | 1.63 | 17.88 | 12.58  | 12.58  | tr H0VRQ2 H0VRQ2_CAVPO | Uncharacterized protein OS=Cavia porcellus GN=AIF1L PE=4 SV=1            | CAVPO | 2 |
| 2898 | 1.48 | 1.56 | 4.225 | 2.414  | 2.414  | tr H0VY18 H0VY18_CAVPO | Uncharacterized protein OS=Cavia porcellus GN=NACC1 PE=4 SV=1            | CAVPO | 1 |

|      |      |      |       |       |        |                        |                                                                                |       |   |
|------|------|------|-------|-------|--------|------------------------|--------------------------------------------------------------------------------|-------|---|
| 2899 | 1.48 | 1.58 | 6.697 | 1.37  | 1.37   | tr H0W9I0 H0W9I0_CAVPO | Uncharacterized protein OS=Cavia porcellus<br>GN=ABCG5 PE=3 SV=1               | CAVPO | 1 |
| 2900 | 1.47 | 1.62 | 13.85 | 11.36 | 4.155  | tr H0UZK1 H0UZK1_CAVPO | Uncharacterized protein OS=Cavia porcellus<br>GN=NSDHL PE=3 SV=1               | CAVPO | 1 |
| 2901 | 1.47 | 1.55 | 4.669 | 4.669 | 4.669  | tr H0V8M3 H0V8M3_CAVPO | Uncharacterized protein (Fragment) OS=Cavia<br>porcellus GN=PIGX PE=4 SV=1     | CAVPO | 1 |
| 2902 | 1.47 | 1.58 | 8.264 | 4.339 | 2.273  | tr H0V8P0 H0V8P0_CAVPO | Uncharacterized protein OS=Cavia porcellus<br>GN=THNSL2 PE=4 SV=1              | CAVPO | 1 |
| 2903 | 1.47 | 1.6  | 18.59 | 6.197 | 2.817  | tr H0VC23 H0VC23_CAVPO | Uncharacterized protein OS=Cavia porcellus<br>GN=STX5 PE=3 SV=1                | CAVPO | 1 |
| 2904 | 1.47 | 17.5 | 36.97 | 36.67 | 33.94  | tr H0VIK4 H0VIK4_CAVPO | Serine/threonine-protein phosphatase<br>OS=Cavia porcellus GN=PPP1CA PE=3 SV=1 | CAVPO | 9 |
| 2905 | 1.47 | 1.62 | 5.371 | 3.886 | 1.943  | tr H0VJW2 H0VJW2_CAVPO | Uncharacterized protein OS=Cavia porcellus<br>GN=MIOS PE=4 SV=1                | CAVPO | 2 |
| 2906 | 1.47 | 1.55 | 56.76 | 18.92 | 18.92  | tr H0W1Q3 H0W1Q3_CAVPO | Uncharacterized protein OS=Cavia porcellus<br>GN=TOMM6 PE=4 SV=1               | CAVPO | 1 |
| 2907 | 1.47 | 1.56 | 6.706 | 6.706 | 2.17   | tr H0W9X7 H0W9X7_CAVPO | Uncharacterized protein OS=Cavia porcellus<br>GN=TCP11L1 PE=4 SV=1             | CAVPO | 1 |
| 2908 | 1.46 | 1.55 | 41.41 | 31.31 | 31.31  | tr H0VLD2 H0VLD2_CAVPO | Uncharacterized protein (Fragment) OS=Cavia<br>porcellus GN=HMGN3 PE=4 SV=1    | CAVPO | 2 |
| 2909 | 1.44 | 1.54 | 5.866 | 1.536 | 1.536  | tr H0UYU8 H0UYU8_CAVPO | Uncharacterized protein OS=Cavia porcellus<br>GN=MAD1L1 PE=4 SV=1              | CAVPO | 1 |
| 2910 | 1.44 | 1.52 | 3.939 | 3.939 | 3.939  | tr H0VER6 H0VER6_CAVPO | Uncharacterized protein (Fragment) OS=Cavia<br>porcellus GN=PLSCR4 PE=4 SV=1   | CAVPO | 1 |
| 2911 | 1.44 | 1.53 | 5.472 | 3.962 | 2.642  | tr H0W0F2 H0W0F2_CAVPO | Uncharacterized protein (Fragment) OS=Cavia<br>porcellus GN=BTB PE=4 SV=1      | CAVPO | 1 |
| 2912 | 1.44 | 1.61 | 6.375 | 1.57  | 0.4282 | tr H0W3I1 H0W3I1_CAVPO | Uncharacterized protein (Fragment) OS=Cavia<br>porcellus GN=PDE4DIP PE=4 SV=1  | CAVPO | 1 |

|      |      |      |       |       |       |                        |                                                                              |       |   |
|------|------|------|-------|-------|-------|------------------------|------------------------------------------------------------------------------|-------|---|
| 2913 | 1.44 | 1.58 | 11.22 | 9.756 | 3.171 | tr H0W7G7 H0W7G7_CAVPO | Uncharacterized protein OS=Cavia porcellus<br>GN=RMDN2 PE=4 SV=1             | CAVPO | 1 |
| 2914 | 1.43 | 1.52 | 12.47 | 2.036 | 2.036 | tr H0VH23 H0VH23_CAVPO | Uncharacterized protein OS=Cavia porcellus<br>GN=Kin PE=4 SV=1               | CAVPO | 1 |
| 2915 | 1.43 | 1.55 | 10.33 | 1.976 | 1.976 | tr H0VYW1 H0VYW1_CAVPO | Uncharacterized protein OS=Cavia porcellus<br>PE=4 SV=1                      | CAVPO | 1 |
| 2916 | 1.43 | 1.63 | 18.87 | 14.37 | 2.817 | tr H0W5G9 H0W5G9_CAVPO | Uncharacterized protein (Fragment) OS=Cavia<br>porcellus GN=MTX1 PE=4 SV=1   | CAVPO | 1 |
| 2917 | 1.42 | 1.53 | 7.674 | 7.674 | 4.556 | tr H0V0B9 H0V0B9_CAVPO | Uncharacterized protein (Fragment) OS=Cavia<br>porcellus GN=IGSF11 PE=4 SV=1 | CAVPO | 1 |
| 2918 | 1.42 | 1.59 | 9.378 | 4.177 | 1.279 | tr H0VDN6 H0VDN6_CAVPO | Uncharacterized protein OS=Cavia porcellus<br>GN=CTR9 PE=4 SV=1              | CAVPO | 1 |
| 2919 | 1.42 | 1.49 | 4.669 | 4.669 | 4.669 | tr H0VE62 H0VE62_CAVPO | Uncharacterized protein OS=Cavia porcellus<br>GN=YIPF5 PE=4 SV=1             | CAVPO | 1 |
| 2920 | 1.41 | 1.49 | 13.41 | 13.41 | 13.41 | tr H0VIC3 H0VIC3_CAVPO | Uncharacterized protein (Fragment) OS=Cavia<br>porcellus GN=TIMM8B PE=4 SV=1 | CAVPO | 1 |
| 2921 | 1.41 | 1.52 | 8.115 | 4.296 | 2.148 | tr H0VJG9 H0VJG9_CAVPO | Uncharacterized protein OS=Cavia porcellus<br>GN=ANKRD10 PE=4 SV=1           | CAVPO | 1 |
| 2922 | 1.4  | 6.2  | 16.88 | 12.86 | 8.521 | tr H0VS09 H0VS09_CAVPO | Uncharacterized protein OS=Cavia porcellus<br>GN=KLC2 PE=4 SV=1              | CAVPO | 4 |
| 2923 | 1.4  | 1.49 | 26.89 | 9.244 | 9.244 | tr H0VWH9 H0VWH9_CAVPO | Uncharacterized protein OS=Cavia porcellus<br>GN=NUDT15 PE=4 SV=1            | CAVPO | 1 |
| 2924 | 1.39 | 1.61 | 8.229 | 4.613 | 2.369 | tr H0V8E2 H0V8E2_CAVPO | Uncharacterized protein OS=Cavia porcellus<br>GN=Rasa4 PE=4 SV=1             | CAVPO | 2 |
| 2925 | 1.39 | 1.51 | 19    | 4.977 | 3.167 | tr H0VDV5 H0VDV5_CAVPO | Uncharacterized protein OS=Cavia porcellus<br>GN=CCDC91 PE=4 SV=1            | CAVPO | 1 |
| 2926 | 1.39 | 1.53 | 5.176 | 5.176 | 1.294 | tr H0VHP8 H0VHP8_CAVPO | Uncharacterized protein OS=Cavia porcellus<br>GN=RFT1 PE=4 SV=1              | CAVPO | 1 |

|      |      |      |       |       |       |                        |                                                                             |       |   |
|------|------|------|-------|-------|-------|------------------------|-----------------------------------------------------------------------------|-------|---|
| 2927 | 1.39 | 1.47 | 12.7  | 10.05 | 10.05 | tr H0VUF0 H0VUF0_CAVPO | Uncharacterized protein OS=Cavia porcellus<br>GN=TMEM205 PE=4 SV=1          | CAVPO | 1 |
| 2928 | 1.38 | 1.46 | 11.04 | 3.084 | 3.084 | tr H0UUP6 H0UUP6_CAVPO | Uncharacterized protein (Fragment) OS=Cavia<br>porcellus GN=LRIT3 PE=4 SV=1 | CAVPO | 1 |
| 2929 | 1.38 | 1.53 | 9.645 | 6.937 | 3.892 | tr H0VD49 H0VD49_CAVPO | Granulins (Fragment) OS=Cavia porcellus<br>GN=GRN PE=4 SV=1                 | CAVPO | 2 |
| 2930 | 1.38 | 1.51 | 4.992 | 3.48  | 1.967 | tr H0VHS2 H0VHS2_CAVPO | Uncharacterized protein (Fragment) OS=Cavia<br>porcellus GN=WDR48 PE=4 SV=1 | CAVPO | 1 |
| 2931 | 1.38 | 1.48 | 9.253 | 3.915 | 3.915 | tr H0W4R1 H0W4R1_CAVPO | Uncharacterized protein (Fragment) OS=Cavia<br>porcellus GN=MTX3 PE=4 SV=1  | CAVPO | 1 |
| 2932 | 1.37 | 1.47 | 3.419 | 3.419 | 1.852 | tr H0UZ93 H0UZ93_CAVPO | Uncharacterized protein (Fragment) OS=Cavia<br>porcellus GN=ATG7 PE=4 SV=1  | CAVPO | 1 |
| 2933 | 1.37 | 1.45 | 19.08 | 6.87  | 6.87  | tr H0V1U9 H0V1U9_CAVPO | Uncharacterized protein OS=Cavia porcellus<br>GN=EMC10 PE=4 SV=1            | CAVPO | 1 |
| 2934 | 1.37 | 1.5  | 12.64 | 6.319 | 3.846 | tr H0V758 H0V758_CAVPO | Uncharacterized protein (Fragment) OS=Cavia<br>porcellus GN=ADA PE=3 SV=1   | CAVPO | 1 |
| 2935 | 1.37 | 1.46 | 5.803 | 1.85  | 1.85  | tr H0VP36 H0VP36_CAVPO | Uncharacterized protein OS=Cavia porcellus<br>GN=SLC24A1 PE=4 SV=1          | CAVPO | 2 |
| 2936 | 1.37 | 1.62 | 6.308 | 4.673 | 2.804 | tr H0VQN2 H0VQN2_CAVPO | Histone deacetylase OS=Cavia porcellus<br>GN=HDAC3 PE=3 SV=1                | CAVPO | 1 |
| 2937 | 1.36 | 1.46 | 8.316 | 4.99  | 2.495 | tr H0VEG8 H0VEG8_CAVPO | Uncharacterized protein (Fragment) OS=Cavia<br>porcellus GN=RCOR3 PE=4 SV=1 | CAVPO | 1 |
| 2938 | 1.36 | 1.5  | 12.48 | 3.248 | 3.248 | tr H0VGE4 H0VGE4_CAVPO | Uncharacterized protein OS=Cavia porcellus<br>GN=SWAP70 PE=4 SV=1           | CAVPO | 2 |
| 2939 | 1.36 | 3.58 | 15.94 | 14.54 | 4.382 | tr H0VHE6 H0VHE6_CAVPO | Uncharacterized protein (Fragment) OS=Cavia<br>porcellus GN=KPNA4 PE=4 SV=1 | CAVPO | 3 |
| 2940 | 1.35 | 1.49 | 2.414 | 1.892 | 1.892 | tr H0UX17 H0UX17_CAVPO | Uncharacterized protein (Fragment) OS=Cavia<br>porcellus PE=4 SV=1          | CAVPO | 2 |

|      |      |      |       |        |         |                        |                                                                           |       |   |
|------|------|------|-------|--------|---------|------------------------|---------------------------------------------------------------------------|-------|---|
| 2941 | 1.35 | 1.46 | 4.284 | 1.463  | 1.463   | tr H0V0Q8 H0V0Q8_CAVPO | Uncharacterized protein (Fragment) OS=Cavia porcellus GN=LARP1 PE=4 SV=1  | CAVPO | 1 |
| 2942 | 1.35 | 1.71 | 3.565 | 0.3753 | 0.05447 | tr H0V1Y5 H0V1Y5_CAVPO | Uncharacterized protein (Fragment) OS=Cavia porcellus GN=Ttn PE=4 SV=1    | CAVPO | 1 |
| 2943 | 1.35 | 1.43 | 6.312 | 6.312  | 2.658   | tr H0VEC0 H0VEC0_CAVPO | Uncharacterized protein OS=Cavia porcellus GN=SLC25A20 PE=3 SV=1          | CAVPO | 1 |
| 2944 | 1.35 | 1.48 | 11.58 | 3.107  | 1.554   | tr H0VEF9 H0VEF9_CAVPO | Uncharacterized protein (Fragment) OS=Cavia porcellus GN=RTF1 PE=4 SV=1   | CAVPO | 2 |
| 2945 | 1.34 | 1.53 | 10.62 | 5.645  | 3.495   | tr H0UUL0 H0UUL0_CAVPO | Uncharacterized protein OS=Cavia porcellus GN=REPS1 PE=4 SV=1             | CAVPO | 2 |
| 2946 | 1.34 | 1.45 | 2.532 | 2.532  | 1.718   | tr H0UXX2 H0UXX2_CAVPO | Uncharacterized protein (Fragment) OS=Cavia porcellus GN=MAGI1 PE=4 SV=1  | CAVPO | 1 |
| 2947 | 1.33 | 1.41 | 6.993 | 6.993  | 6.993   | tr H0UTN2 H0UTN2_CAVPO | Uncharacterized protein OS=Cavia porcellus GN=CLDND2 PE=4 SV=1            | CAVPO | 1 |
| 2948 | 1.33 | 1.46 | 5.735 | 2.398  | 2.398   | tr H0VGZ0 H0VGZ0_CAVPO | Uncharacterized protein (Fragment) OS=Cavia porcellus GN=LIMCH1 PE=4 SV=1 | CAVPO | 2 |
| 2949 | 1.33 | 4.89 | 19.78 | 5.806  | 5.806   | tr H0VIA2 H0VIA2_CAVPO | Uncharacterized protein OS=Cavia porcellus GN=KRT7 PE=3 SV=1              | CAVPO | 3 |
| 2950 | 1.33 | 1.46 | 16.8  | 5.785  | 2.755   | tr H0VIM1 H0VIM1_CAVPO | Uncharacterized protein OS=Cavia porcellus GN=RFC4 PE=4 SV=1              | CAVPO | 1 |
| 2951 | 1.33 | 1.43 | 15.32 | 2.078  | 2.078   | tr H0VKW0 H0VKW0_CAVPO | Uncharacterized protein (Fragment) OS=Cavia porcellus GN=SPHK1 PE=4 SV=1  | CAVPO | 1 |
| 2952 | 1.33 | 5.56 | 12.1  | 5.832  | 5.832   | tr H0VP43 H0VP43_CAVPO | Uncharacterized protein (Fragment) OS=Cavia porcellus GN=MAPK10 PE=4 SV=1 | CAVPO | 3 |
| 2953 | 1.33 | 1.42 | 11.74 | 2.347  | 2.347   | tr H0VRT8 H0VRT8_CAVPO | Uncharacterized protein (Fragment) OS=Cavia porcellus GN=NEU1 PE=4 SV=1   | CAVPO | 1 |
| 2954 | 1.33 | 1.57 | 4.444 | 4.444  | 4.444   | tr H0VS85 H0VS85_CAVPO | Uncharacterized protein (Fragment) OS=Cavia porcellus GN=SMAP1 PE=4 SV=1  | CAVPO | 2 |

|      |      |      |       |       |       |                        |                                                                           |       |   |
|------|------|------|-------|-------|-------|------------------------|---------------------------------------------------------------------------|-------|---|
| 2955 | 1.33 | 14.7 | 35.9  | 27.99 | 13.59 | tr H0W4G1 H0W4G1_CAVPO | Uncharacterized protein (Fragment) OS=Cavia porcellus GN=AHCYL2 PE=3 SV=1 | CAVPO | 7 |
| 2956 | 1.32 | 1.48 | 4.455 | 3.517 | 1.29  | tr H0UYF2 H0UYF2_CAVPO | Uncharacterized protein (Fragment) OS=Cavia porcellus GN=COG5 PE=4 SV=1   | CAVPO | 1 |
| 2957 | 1.32 | 1.48 | 15.93 | 9.615 | 6.044 | tr H0V1C7 H0V1C7_CAVPO | Uncharacterized protein OS=Cavia porcellus GN=DRG2 PE=4 SV=1              | CAVPO | 2 |
| 2958 | 1.32 | 1.72 | 9.329 | 4.956 | 2.624 | tr H0VRL8 H0VRL8_CAVPO | Uncharacterized protein (Fragment) OS=Cavia porcellus GN=HOMER2 PE=4 SV=1 | CAVPO | 1 |
| 2959 | 1.32 | 1.42 | 11.52 | 4.783 | 1.957 | tr H0W1K3 H0W1K3_CAVPO | Annexin (Fragment) OS=Cavia porcellus GN=ANXA11 PE=3 SV=1                 | CAVPO | 1 |
| 2960 | 1.31 | 1.4  | 2.647 | 1.418 | 1.418 | tr H0V032 H0V032_CAVPO | Uncharacterized protein OS=Cavia porcellus GN=MICAL1 PE=4 SV=1            | CAVPO | 1 |
| 2961 | 1.31 | 1.41 | 6.417 | 2.523 | 1.081 | tr H0VC13 H0VC13_CAVPO | Uncharacterized protein OS=Cavia porcellus GN=KIAA1107 PE=4 SV=1          | CAVPO | 1 |
| 2962 | 1.31 | 1.39 | 8.081 | 4.04  | 4.04  | tr H0VN24 H0VN24_CAVPO | Uncharacterized protein OS=Cavia porcellus GN=DSCR3 PE=4 SV=1             | CAVPO | 1 |
| 2963 | 1.29 | 1.45 | 9.383 | 6.42  | 4.691 | tr H0V616 H0V616_CAVPO | Uncharacterized protein OS=Cavia porcellus GN=RBM17 PE=4 SV=1             | CAVPO | 2 |
| 2964 | 1.29 | 1.46 | 14.49 | 12.37 | 5.3   | tr H0W3U1 H0W3U1_CAVPO | Uncharacterized protein (Fragment) OS=Cavia porcellus GN=PPAP2C PE=4 SV=1 | CAVPO | 1 |
| 2965 | 1.29 | 1.38 | 28.66 | 4.459 | 4.459 | tr H0W9S6 H0W9S6_CAVPO | Uncharacterized protein OS=Cavia porcellus GN=Nudt11 PE=3 SV=1            | CAVPO | 1 |
| 2966 | 1.28 | 1.37 | 1.939 | 1.939 | 1.939 | tr H0UX09 H0UX09_CAVPO | Uncharacterized protein (Fragment) OS=Cavia porcellus GN=AVL9 PE=4 SV=1   | CAVPO | 1 |
| 2967 | 1.28 | 1.36 | 7.568 | 7.568 | 7.568 | tr H0V6J9 H0V6J9_CAVPO | Uncharacterized protein OS=Cavia porcellus GN=SSR3 PE=4 SV=1              | CAVPO | 1 |
| 2968 | 1.28 | 1.37 | 4.743 | 4.743 | 4.743 | tr H0VI27 H0VI27_CAVPO | Uncharacterized protein (Fragment) OS=Cavia porcellus GN=CUTC PE=3 SV=1   | CAVPO | 1 |

|      |      |      |       |       |       |                        |                                                                                         |       |   |
|------|------|------|-------|-------|-------|------------------------|-----------------------------------------------------------------------------------------|-------|---|
| 2969 | 1.28 | 1.36 | 20.3  | 4.95  | 4.95  | tr H0VSK6 H0VSK6_CAVPO | Uncharacterized protein OS=Cavia porcellus<br>GN=BCL7B PE=4 SV=1                        | CAVPO | 1 |
| 2970 | 1.27 | 1.45 | 16.29 | 9.551 | 2.247 | tr H0UT47 H0UT47_CAVPO | Uncharacterized protein OS=Cavia porcellus<br>GN=BAIAP2 PE=4 SV=1                       | CAVPO | 1 |
| 2971 | 1.27 | 1.45 | 17.36 | 12.69 | 5.959 | tr H0UW30 H0UW30_CAVPO | Uncharacterized protein OS=Cavia porcellus<br>GN=NAPEPLD PE=4 SV=1                      | CAVPO | 2 |
| 2972 | 1.27 | 1.5  | 10.85 | 7.39  | 1.549 | tr H0V193 H0V193_CAVPO | Uncharacterized protein OS=Cavia porcellus<br>GN=VPS16 PE=4 SV=1                        | CAVPO | 1 |
| 2973 | 1.27 | 1.46 | 23.11 | 19.12 | 8.613 | tr H0VPA7 H0VPA7_CAVPO | Uncharacterized protein (Fragment) OS=Cavia<br>porcellus GN=GPT2 PE=4 SV=1              | CAVPO | 2 |
| 2974 | 1.26 | 5.79 | 18.88 | 18.88 | 18.88 | tr H0VL19 H0VL19_CAVPO | Proteasome subunit alpha type OS=Cavia<br>porcellus GN=PSMA8 PE=3 SV=1                  | CAVPO | 4 |
| 2975 | 1.26 | 1.35 | 5.622 | 1.807 | 1.807 | tr H0W964 H0W964_CAVPO | Uncharacterized protein OS=Cavia porcellus<br>GN=LOC100719074 PE=4 SV=1                 | CAVPO | 1 |
| 2976 | 1.25 | 1.43 | 11.49 | 3.908 | 1.149 | tr H0UV24 H0UV24_CAVPO | Uncharacterized protein OS=Cavia porcellus<br>GN=BBS9 PE=4 SV=1                         | CAVPO | 1 |
| 2977 | 1.25 | 1.39 | 4.658 | 4.658 | 2.329 | tr H0V4R5 H0V4R5_CAVPO | Uncharacterized protein OS=Cavia porcellus<br>GN=TBC1D17 PE=4 SV=1                      | CAVPO | 1 |
| 2978 | 1.25 | 1.32 | 6.916 | 4.611 | 4.611 | tr H0VSA1 H0VSA1_CAVPO | Uncharacterized protein OS=Cavia porcellus<br>GN=FAM118B PE=4 SV=1                      | CAVPO | 1 |
| 2979 | 1.25 | 1.35 | 16.43 | 10.14 | 5.314 | tr H0W1B9 H0W1B9_CAVPO | Uncharacterized protein (Fragment) OS=Cavia<br>porcellus GN=RPL7 PE=3 SV=1              | CAVPO | 1 |
| 2980 | 1.24 | 1.32 | 5.383 | 1.305 | 1.305 | tr D3YE96 D3YE96_CAVPO | Acetylcholinesterase OS=Cavia porcellus<br>GN=AchE PE=2 SV=1                            | CAVPO | 1 |
| 2981 | 1.24 | 1.32 | 8.257 | 8.257 | 8.257 | tr H0UUS7 H0UUS7_CAVPO | Transcription initiation factor IIA subunit 2<br>OS=Cavia porcellus GN=GTF2A2 PE=3 SV=1 | CAVPO | 1 |
| 2982 | 1.24 | 1.39 | 12.26 | 9.748 | 5.975 | tr H0UWY6 H0UWY6_CAVPO | Uncharacterized protein (Fragment) OS=Cavia<br>porcellus GN=SLC25A1 PE=3 SV=1           | CAVPO | 2 |



|      |      |      |       |        |        |                        |                                                                            |       |   |
|------|------|------|-------|--------|--------|------------------------|----------------------------------------------------------------------------|-------|---|
| 2983 | 1.24 | 1.39 | 11.26 | 9.066  | 3.571  | tr H0VG28 H0VG28_CAVPO | Uncharacterized protein (Fragment) OS=Cavia porcellus GN=Cxadr PE=4 SV=1   | CAVPO | 1 |
| 2984 | 1.24 | 1.34 | 9.222 | 1.989  | 1.989  | tr H0VI15 H0VI15_CAVPO | Uncharacterized protein (Fragment) OS=Cavia porcellus GN=YTHDC1 PE=4 SV=1  | CAVPO | 1 |
| 2985 | 1.24 | 1.38 | 17.11 | 17.11  | 11.4   | tr H0VK21 H0VK21_CAVPO | Uncharacterized protein OS=Cavia porcellus GN=C2orf49 PE=4 SV=1            | CAVPO | 2 |
| 2986 | 1.24 | 1.39 | 16.51 | 16.51  | 5.66   | tr H0VKD3 H0VKD3_CAVPO | Uncharacterized protein OS=Cavia porcellus GN=PDCD10 PE=4 SV=1             | CAVPO | 1 |
| 2987 | 1.24 | 1.38 | 5     | 5      | 5      | tr H0VUD0 H0VUD0_CAVPO | Uncharacterized protein (Fragment) OS=Cavia porcellus GN=PIP4K2C PE=4 SV=1 | CAVPO | 2 |
| 2988 | 1.24 | 1.32 | 6.417 | 3.209  | 3.209  | tr H0VW65 H0VW65_CAVPO | Uncharacterized protein (Fragment) OS=Cavia porcellus GN=PTAR1 PE=4 SV=1   | CAVPO | 1 |
| 2989 | 1.24 | 1.62 | 12.99 | 11.02  | 1.772  | tr H0W0F6 H0W0F6_CAVPO | Uncharacterized protein OS=Cavia porcellus GN=ARFGAP3 PE=4 SV=1            | CAVPO | 1 |
| 2990 | 1.24 | 1.34 | 14.33 | 7.164  | 2.687  | tr H0W372 H0W372_CAVPO | Uncharacterized protein OS=Cavia porcellus GN=B3GAT3 PE=4 SV=1             | CAVPO | 1 |
| 2991 | 1.23 | 1.38 | 20.92 | 15.69  | 4.902  | tr H0UY57 H0UY57_CAVPO | Uncharacterized protein (Fragment) OS=Cavia porcellus GN=UFD1L PE=4 SV=1   | CAVPO | 1 |
| 2992 | 1.23 | 1.31 | 6.128 | 4.457  | 4.457  | tr H0V1M2 H0V1M2_CAVPO | Uncharacterized protein OS=Cavia porcellus GN=SLC35B1 PE=4 SV=1            | CAVPO | 1 |
| 2993 | 1.23 | 1.38 | 9.128 | 4.905  | 4.087  | tr H0V219 H0V219_CAVPO | Uncharacterized protein (Fragment) OS=Cavia porcellus GN=RPS6KA1 PE=4 SV=1 | CAVPO | 2 |
| 2994 | 1.23 | 1.32 | 3.538 | 0.2984 | 0.2984 | tr H0V6W7 H0V6W7_CAVPO | Uncharacterized protein OS=Cavia porcellus GN=ACACA PE=3 SV=1              | CAVPO | 1 |
| 2995 | 1.23 | 1.4  | 21.43 | 15.34  | 0      | tr H0V9U4 H0V9U4_CAVPO | Uncharacterized protein OS=Cavia porcellus GN=DPF3 PE=4 SV=1               | CAVPO | 0 |
| 2996 | 1.23 | 1.34 | 6.481 | 2.16   | 1.337  | tr H0VEN1 H0VEN1_CAVPO | Uncharacterized protein (Fragment) OS=Cavia porcellus GN=INTS3 PE=4 SV=1   | CAVPO | 1 |

|      |      |      |       |        |        |                        |                                                                            |       |   |
|------|------|------|-------|--------|--------|------------------------|----------------------------------------------------------------------------|-------|---|
| 2997 | 1.23 | 1.33 | 10.05 | 5.667  | 3.291  | tr H0VQA5 H0VQA5_CAVPO | Uncharacterized protein (Fragment) OS=Cavia porcellus GN=FOXK1 PE=4 SV=1   | CAVPO | 1 |
| 2998 | 1.23 | 3.47 | 35.61 | 34.09  | 18.94  | tr H0VWS6 H0VWS6_CAVPO | Uncharacterized protein (Fragment) OS=Cavia porcellus GN=CPLX1 PE=4 SV=1   | CAVPO | 2 |
| 2999 | 1.22 | 1.3  | 3.759 | 2.105  | 2.105  | tr H0UZ30 H0UZ30_CAVPO | Uncharacterized protein OS=Cavia porcellus GN=OS9 PE=4 SV=1                | CAVPO | 1 |
| 3000 | 1.22 | 1.31 | 7.572 | 1.336  | 1.336  | tr H0VPE2 H0VPE2_CAVPO | Uncharacterized protein OS=Cavia porcellus GN=Glr1 PE=3 SV=1               | CAVPO | 1 |
| 3001 | 1.22 | 1.38 | 19.49 | 13.1   | 3.514  | tr H0VQY8 H0VQY8_CAVPO | Uncharacterized protein OS=Cavia porcellus GN=Rmdn1 PE=4 SV=1              | CAVPO | 1 |
| 3002 | 1.22 | 1.44 | 10.8  | 8.483  | 2.571  | tr H0W0S2 H0W0S2_CAVPO | Uncharacterized protein OS=Cavia porcellus GN=CBX8 PE=4 SV=1               | CAVPO | 1 |
| 3003 | 1.21 | 1.36 | 13.79 | 10.68  | 3.107  | tr H0UUH7 H0UUH7_CAVPO | Uncharacterized protein OS=Cavia porcellus GN=TTC8 PE=4 SV=1               | CAVPO | 1 |
| 3004 | 1.21 | 1.34 | 6.649 | 3.089  | 1.813  | tr H0UWC2 H0UWC2_CAVPO | Uncharacterized protein OS=Cavia porcellus GN=GOLGA3 PE=4 SV=1             | CAVPO | 2 |
| 3005 | 1.21 | 1.35 | 3.532 | 3.532  | 3.532  | tr H0V0H9 H0V0H9_CAVPO | Uncharacterized protein (Fragment) OS=Cavia porcellus GN=WASL PE=4 SV=1    | CAVPO | 2 |
| 3006 | 1.21 | 1.42 | 15.63 | 8.807  | 3.409  | tr H0VQ62 H0VQ62_CAVPO | Uncharacterized protein (Fragment) OS=Cavia porcellus GN=GPD1L PE=3 SV=1   | CAVPO | 1 |
| 3007 | 1.21 | 9.71 | 22.55 | 13.86  | 8.872  | tr H0VTP1 H0VTP1_CAVPO | Uncharacterized protein OS=Cavia porcellus GN=YES1 PE=4 SV=1               | CAVPO | 5 |
| 3008 | 1.21 | 1.35 | 15.75 | 5.503  | 3.416  | tr H0VYA5 H0VYA5_CAVPO | Uncharacterized protein (Fragment) OS=Cavia porcellus GN=PVRL2 PE=4 SV=1   | CAVPO | 2 |
| 3009 | 1.21 | 1.3  | 2.401 | 0.8212 | 0.8212 | tr H0WBX5 H0WBX5_CAVPO | Uncharacterized protein (Fragment) OS=Cavia porcellus GN=CAMSAP1 PE=4 SV=1 | CAVPO | 1 |
| 3010 | 1.2  | 3.51 | 36.02 | 18.96  | 10.9   | tr H0V1C5 H0V1C5_CAVPO | Synaptosomal-associated protein OS=Cavia porcellus GN=SNAP23 PE=3 SV=1     | CAVPO | 3 |

|      |      |      |       |        |        |                        |                                                                                            |       |   |
|------|------|------|-------|--------|--------|------------------------|--------------------------------------------------------------------------------------------|-------|---|
| 3011 | 1.2  | 1.35 | 1.721 | 0.6287 | 0.2978 | tr H0V1Z4 H0V1Z4_CAVPO | Uncharacterized protein OS=Cavia porcellus<br>GN=FRY PE=4 SV=1                             | CAVPO | 1 |
| 3012 | 1.2  | 1.35 | 7.523 | 2.808  | 1.103  | tr H0V3W2 H0V3W2_CAVPO | Uncharacterized protein OS=Cavia porcellus<br>GN=SEC23IP PE=4 SV=1                         | CAVPO | 1 |
| 3013 | 1.2  | 1.28 | 2.679 | 2.679  | 2.679  | tr H0V6T7 H0V6T7_CAVPO | Uncharacterized protein OS=Cavia porcellus<br>GN=GPR107 PE=4 SV=1                          | CAVPO | 1 |
| 3014 | 1.19 | 1.31 | 7.707 | 4.624  | 1.927  | tr H0VHA3 H0VHA3_CAVPO | Uncharacterized protein (Fragment) OS=Cavia<br>porcellus GN=RORB PE=3 SV=1                 | CAVPO | 1 |
| 3015 | 1.19 | 1.28 | 1.267 | 1.267  | 1.267  | tr H0VXF5 H0VXF5_CAVPO | Uncharacterized protein (Fragment) OS=Cavia<br>porcellus GN=SORCS2 PE=4 SV=1               | CAVPO | 1 |
| 3016 | 1.19 | 9.6  | 60.53 | 57.89  | 57.89  | tr H0WAD6 H0WAD6_CAVPO | Uncharacterized protein OS=Cavia porcellus<br>PE=4 SV=1                                    | CAVPO | 8 |
| 3017 | 1.18 | 1.3  | 10.55 | 3.247  | 1.623  | tr H0UT14 H0UT14_CAVPO | Uncharacterized protein OS=Cavia porcellus<br>GN=RPA1 PE=4 SV=1                            | CAVPO | 1 |
| 3018 | 1.18 | 1.29 | 9.615 | 6.731  | 2.5    | tr H0VMN2 H0VMN2_CAVPO | Succinyl-CoA:3-ketoacid-coenzyme A<br>transferase OS=Cavia porcellus GN=OXCT1<br>PE=3 SV=1 | CAVPO | 1 |
| 3019 | 1.17 | 1.25 | 7.895 | 6.842  | 6.842  | tr H0VTM3 H0VTM3_CAVPO | Uncharacterized protein OS=Cavia porcellus<br>GN=TMEM9 PE=4 SV=1                           | CAVPO | 1 |
| 3020 | 1.17 | 1.27 | 4.966 | 4.966  | 2.935  | tr H0VVA9 H0VVA9_CAVPO | Uncharacterized protein OS=Cavia porcellus<br>GN=NDUFAF7 PE=4 SV=1                         | CAVPO | 1 |
| 3021 | 1.16 | 1.33 | 28.9  | 18.81  | 0      | tr H0V5B4 H0V5B4_CAVPO | Uncharacterized protein OS=Cavia porcellus<br>GN=MRPS34 PE=4 SV=1                          | CAVPO | 0 |
| 3022 | 1.16 | 1.3  | 19.73 | 11.66  | 11.66  | tr H0VY33 H0VY33_CAVPO | Uncharacterized protein OS=Cavia porcellus<br>GN=CCDC124 PE=4 SV=1                         | CAVPO | 2 |
| 3023 | 1.16 | 1.25 | 6.97  | 2.727  | 2.727  | tr H0VZ46 H0VZ46_CAVPO | Uncharacterized protein (Fragment) OS=Cavia<br>porcellus GN=OGFRL1 PE=4 SV=1               | CAVPO | 1 |
| 3024 | 1.15 | 1.3  | 8.075 | 8.075  | 5.59   | tr H0V5X2 H0V5X2_CAVPO | Uncharacterized protein OS=Cavia porcellus                                                 | CAVPO | 2 |

|      |      |      |       |       |       |                        |                                                                             |       |   |
|------|------|------|-------|-------|-------|------------------------|-----------------------------------------------------------------------------|-------|---|
|      |      |      |       |       |       |                        | GN=CCDC47 PE=4 SV=1                                                         |       |   |
| 3025 | 1.14 | 1.27 | 1.951 | 1.951 | 1.951 | tr H0UU23 H0UU23_CAVPO | Uncharacterized protein OS=Cavia porcellus<br>GN=NCOA2 PE=4 SV=1            | CAVPO | 2 |
| 3026 | 1.14 | 1.26 | 7.25  | 3.107 | 1.036 | tr H0UX95 H0UX95_CAVPO | Uncharacterized protein OS=Cavia porcellus<br>GN=PRPF40B PE=4 SV=1          | CAVPO | 1 |
| 3027 | 1.14 | 3.36 | 17.87 | 10.97 | 10.97 | tr H0UZ46 H0UZ46_CAVPO | Uncharacterized protein (Fragment) OS=Cavia<br>porcellus GN=RDH11 PE=3 SV=1 | CAVPO | 3 |
| 3028 | 1.14 | 1.23 | 9.465 | 4.733 | 3.498 | tr H0V7L9 H0V7L9_CAVPO | Uncharacterized protein (Fragment) OS=Cavia<br>porcellus GN=FRMD5 PE=4 SV=1 | CAVPO | 1 |
| 3029 | 1.14 | 1.28 | 14.62 | 11.92 | 11.92 | tr H0V7S7 H0V7S7_CAVPO | Uncharacterized protein (Fragment) OS=Cavia<br>porcellus GN=BCCIP PE=4 SV=1 | CAVPO | 2 |
| 3030 | 1.14 | 1.24 | 6.286 | 1.714 | 1.714 | tr H0VD64 H0VD64_CAVPO | Uncharacterized protein OS=Cavia porcellus<br>GN=UPF2 PE=4 SV=1             | CAVPO | 1 |
| 3031 | 1.14 | 1.25 | 18.37 | 1.895 | 1.895 | tr H0VKE2 H0VKE2_CAVPO | Uncharacterized protein OS=Cavia porcellus<br>GN=RHPN2 PE=4 SV=1            | CAVPO | 1 |
| 3032 | 1.14 | 1.26 | 8.257 | 1.009 | 1.009 | tr H0VNE9 H0VNE9_CAVPO | Uncharacterized protein OS=Cavia porcellus<br>GN=TMF1 PE=4 SV=1             | CAVPO | 1 |
| 3033 | 1.14 | 1.34 | 44.3  | 29.11 | 4.43  | tr H0VSN8 H0VSN8_CAVPO | Uncharacterized protein OS=Cavia porcellus<br>GN=RPS11 PE=3 SV=1            | CAVPO | 1 |
| 3034 | 1.14 | 1.23 | 33.33 | 14.71 | 14.71 | tr H0W9L6 H0W9L6_CAVPO | Uncharacterized protein OS=Cavia porcellus<br>GN=SPCS1 PE=4 SV=1            | CAVPO | 1 |
| 3035 | 1.14 | 1.26 | 12.76 | 12.76 | 4.138 | tr H0WD55 H0WD55_CAVPO | Uncharacterized protein OS=Cavia porcellus<br>GN=PIH1D1 PE=4 SV=1           | CAVPO | 1 |
| 3036 | 1.13 | 1.27 | 15.7  | 7.623 | 4.933 | tr H0UYL9 H0UYL9_CAVPO | Uncharacterized protein OS=Cavia porcellus<br>GN=CHMP7 PE=4 SV=1            | CAVPO | 2 |
| 3037 | 1.13 | 1.21 | 14.09 | 5.705 | 5.705 | tr H0V3R3 H0V3R3_CAVPO | Uncharacterized protein OS=Cavia porcellus<br>GN=JAM2 PE=4 SV=1             | CAVPO | 1 |

|      |      |      |       |        |        |                        |                                                                           |       |   |
|------|------|------|-------|--------|--------|------------------------|---------------------------------------------------------------------------|-------|---|
| 3038 | 1.13 | 2.63 | 19.51 | 10.37  | 7.407  | tr H0V658 H0V658_CAVPO | Uncharacterized protein (Fragment) OS=Cavia porcellus GN=GABRB3 PE=3 SV=1 | CAVPO | 2 |
| 3039 | 1.13 | 1.21 | 4.62  | 4.62   | 4.62   | tr H0V6P3 H0V6P3_CAVPO | Uncharacterized protein OS=Cavia porcellus GN=TEX264 PE=4 SV=1            | CAVPO | 1 |
| 3040 | 1.12 | 1.29 | 12.33 | 8.969  | 2.242  | tr H0UTP1 H0UTP1_CAVPO | Uncharacterized protein OS=Cavia porcellus GN=Bckdha PE=4 SV=1            | CAVPO | 1 |
| 3041 | 1.12 | 1.29 | 9.114 | 6.329  | 2.658  | tr H0UY51 H0UY51_CAVPO | Uncharacterized protein OS=Cavia porcellus GN=ESPN PE=4 SV=1              | CAVPO | 2 |
| 3042 | 1.12 | 1.21 | 2.455 | 2.455  | 2.455  | tr H0VLS5 H0VLS5_CAVPO | Uncharacterized protein OS=Cavia porcellus GN=BAG4 PE=4 SV=1              | CAVPO | 1 |
| 3043 | 1.12 | 2.82 | 8.673 | 7.143  | 7.143  | tr H0VQZ9 H0VQZ9_CAVPO | Uncharacterized protein OS=Cavia porcellus GN=TSC22D4 PE=4 SV=1           | CAVPO | 3 |
| 3044 | 1.12 | 1.3  | 11.22 | 5.179  | 2.343  | tr H0VTG6 H0VTG6_CAVPO | Uncharacterized protein OS=Cavia porcellus PE=4 SV=1                      | CAVPO | 2 |
| 3045 | 1.11 | 1.21 | 3.733 | 0.5867 | 0.5867 | tr H0UUN0 H0UUN0_CAVPO | Uncharacterized protein OS=Cavia porcellus GN=NAV1 PE=4 SV=1              | CAVPO | 1 |
| 3046 | 1.11 | 1.19 | 3.084 | 3.084  | 3.084  | tr H0V967 H0V967_CAVPO | Uncharacterized protein (Fragment) OS=Cavia porcellus GN=ITM2B PE=4 SV=1  | CAVPO | 1 |
| 3047 | 1.11 | 1.2  | 5.794 | 5.794  | 4.486  | tr H0VQ52 H0VQ52_CAVPO | Uncharacterized protein OS=Cavia porcellus GN=SLC7A8 PE=4 SV=1            | CAVPO | 1 |
| 3048 | 1.11 | 1.19 | 7.023 | 5.351  | 5.351  | tr H0W699 H0W699_CAVPO | Uncharacterized protein OS=Cavia porcellus GN=LOC100714430 PE=4 SV=1      | CAVPO | 1 |
| 3049 | 1.1  | 1.21 | 6.785 | 3.716  | 1.777  | tr H0UTJ3 H0UTJ3_CAVPO | Uncharacterized protein OS=Cavia porcellus GN=SLC27A6 PE=4 SV=1           | CAVPO | 1 |
| 3050 | 1.1  | 1.26 | 24.07 | 14.11  | 5.394  | tr H0UWW6 H0UWW6_CAVPO | Uncharacterized protein (Fragment) OS=Cavia porcellus GN=PDCL3 PE=4 SV=1  | CAVPO | 1 |
| 3051 | 1.1  | 1.2  | 7.709 | 1.713  | 1.713  | tr H0V8T7 H0V8T7_CAVPO | Uncharacterized protein (Fragment) OS=Cavia porcellus GN=INPP5K PE=4 SV=1 | CAVPO | 2 |

|      |      |      |       |        |        |                        |                                                                             |       |   |
|------|------|------|-------|--------|--------|------------------------|-----------------------------------------------------------------------------|-------|---|
| 3052 | 1.1  | 1.2  | 14.59 | 10.53  | 5.024  | tr H0VB56 H0VB56_CAVPO | Uncharacterized protein OS=Cavia porcellus<br>GN=TRAPPC13 PE=4 SV=1         | CAVPO | 1 |
| 3053 | 1.1  | 1.22 | 17.58 | 11.36  | 5.495  | tr H0VCE0 H0VCE0_CAVPO | Uncharacterized protein OS=Cavia porcellus<br>GN=PAQR4 PE=4 SV=1            | CAVPO | 1 |
| 3054 | 1.1  | 1.18 | 7.171 | 4.382  | 4.382  | tr H0VK66 H0VK66_CAVPO | Uncharacterized protein OS=Cavia porcellus<br>GN=DERL1 PE=4 SV=1            | CAVPO | 1 |
| 3055 | 1.1  | 1.2  | 6.773 | 1.338  | 1.338  | tr H0VMM8 H0VMM8_CAVPO | Uncharacterized protein OS=Cavia porcellus<br>GN=Wapal PE=4 SV=1            | CAVPO | 1 |
| 3056 | 1.09 | 1.4  | 15.19 | 9.409  | 1.344  | tr H0UVA5 H0UVA5_CAVPO | Uncharacterized protein OS=Cavia porcellus<br>GN=TRIM3 PE=4 SV=1            | CAVPO | 1 |
| 3057 | 1.09 | 1.34 | 8.278 | 5.474  | 2.136  | tr H0VNT2 H0VNT2_CAVPO | Uncharacterized protein OS=Cavia porcellus<br>GN=EML2 PE=4 SV=1             | CAVPO | 2 |
| 3058 | 1.09 | 5.27 | 7.494 | 7.494  | 7.494  | tr H0VTN4 H0VTN4_CAVPO | Uncharacterized protein OS=Cavia porcellus<br>GN=MAPK8 PE=4 SV=1            | CAVPO | 3 |
| 3059 | 1.09 | 1.18 | 13.21 | 8.491  | 8.491  | tr H0VZ09 H0VZ09_CAVPO | Uncharacterized protein (Fragment) OS=Cavia<br>porcellus GN=GATC PE=3 SV=1  | CAVPO | 1 |
| 3060 | 1.08 | 1.17 | 4.102 | 2.405  | 1.556  | tr H0V5I0 H0V5I0_CAVPO | Uncharacterized protein (Fragment) OS=Cavia<br>porcellus GN=Bop1 PE=3 SV=1  | CAVPO | 1 |
| 3061 | 1.08 | 1.17 | 4.215 | 1.903  | 1.292  | tr H0V912 H0V912_CAVPO | Uncharacterized protein OS=Cavia porcellus<br>GN=MAGI3 PE=4 SV=1            | CAVPO | 1 |
| 3062 | 1.08 | 1.17 | 5.252 | 1.969  | 1.969  | tr H0VGI6 H0VGI6_CAVPO | Uncharacterized protein (Fragment) OS=Cavia<br>porcellus GN=ASAP2 PE=4 SV=1 | CAVPO | 1 |
| 3063 | 1.08 | 1.16 | 1.998 | 0.8226 | 0.8226 | tr H0VU90 H0VU90_CAVPO | Uncharacterized protein OS=Cavia porcellus<br>GN=SETD1A PE=4 SV=1           | CAVPO | 1 |
| 3064 | 1.07 | 1.16 | 5.314 | 2.415  | 2.415  | tr H0V585 H0V585_CAVPO | Uncharacterized protein OS=Cavia porcellus<br>GN=Fam175b PE=4 SV=1          | CAVPO | 1 |
| 3065 | 1.07 | 1.24 | 24.9  | 16.33  | 5.306  | tr H0VGR7 H0VGR7_CAVPO | Uncharacterized protein OS=Cavia porcellus<br>GN=BDH2 PE=4 SV=1             | CAVPO | 1 |

|      |      |      |       |       |       |                        |                                                                            |       |   |
|------|------|------|-------|-------|-------|------------------------|----------------------------------------------------------------------------|-------|---|
| 3066 | 1.07 | 1.16 | 8.091 | 5.825 | 5.825 | tr H0W187 H0W187_CAVPO | Uncharacterized protein (Fragment) OS=Cavia porcellus GN=NUBP1 PE=3 SV=1   | CAVPO | 1 |
| 3067 | 1.07 | 1.16 | 11.2  | 5.6   | 2.4   | tr H0W655 H0W655_CAVPO | Uncharacterized protein (Fragment) OS=Cavia porcellus GN=RGS20 PE=4 SV=1   | CAVPO | 1 |
| 3068 | 1.06 | 1.21 | 7.214 | 4.353 | 1.493 | tr H0UZI3 H0UZI3_CAVPO | Uncharacterized protein OS=Cavia porcellus GN=ALDH16A1 PE=4 SV=1           | CAVPO | 1 |
| 3069 | 1.06 | 3.55 | 26.87 | 23.79 | 18.06 | tr H0V6W6 H0V6W6_CAVPO | Uncharacterized protein (Fragment) OS=Cavia porcellus GN=VAPA PE=4 SV=1    | CAVPO | 3 |
| 3070 | 1.06 | 1.14 | 3.704 | 1.961 | 1.961 | tr H0VA57 H0VA57_CAVPO | Uncharacterized protein (Fragment) OS=Cavia porcellus GN=B3GALTL PE=4 SV=1 | CAVPO | 1 |
| 3071 | 1.06 | 1.16 | 7.307 | 5.846 | 3.34  | tr H0VCK7 H0VCK7_CAVPO | Uncharacterized protein OS=Cavia porcellus GN=DNAJA3 PE=3 SV=1             | CAVPO | 1 |
| 3072 | 1.06 | 1.18 | 8.108 | 8.108 | 4.955 | tr H0VVQ3 H0VVQ3_CAVPO | Uncharacterized protein OS=Cavia porcellus GN=CDC34 PE=3 SV=1              | CAVPO | 1 |
| 3073 | 1.05 | 1.14 | 6.033 | 1.463 | 1.463 | tr H0V3G8 H0V3G8_CAVPO | Uncharacterized protein (Fragment) OS=Cavia porcellus GN=FAM134A PE=4 SV=1 | CAVPO | 1 |
| 3074 | 1.05 | 4.35 | 10.3  | 8.108 | 8.108 | tr H0VGM8 H0VGM8_CAVPO | Uncharacterized protein OS=Cavia porcellus GN=GATAD2B PE=4 SV=1            | CAVPO | 4 |
| 3075 | 1.05 | 1.13 | 5.419 | 3.448 | 3.448 | tr H0VRN1 H0VRN1_CAVPO | Uncharacterized protein OS=Cavia porcellus GN=TM7SF2 PE=4 SV=1             | CAVPO | 1 |
| 3076 | 1.05 | 1.13 | 2.621 | 2.621 | 2.621 | tr H0W1M5 H0W1M5_CAVPO | Uncharacterized protein OS=Cavia porcellus GN=Xiap PE=4 SV=1               | CAVPO | 1 |
| 3077 | 1.05 | 1.18 | 22.66 | 22.66 | 8.594 | tr H0WBG9 H0WBG9_CAVPO | Uncharacterized protein (Fragment) OS=Cavia porcellus GN=FAM195B PE=4 SV=1 | CAVPO | 1 |
| 3078 | 1.05 | 1.13 | 3.774 | 1.887 | 1.887 | tr H0WBJ0 H0WBJ0_CAVPO | Uncharacterized protein OS=Cavia porcellus GN=LRRC2 PE=4 SV=1              | CAVPO | 1 |
| 3079 | 1.04 | 3.25 | 5.386 | 2.814 | 1.447 | tr H0UTG3 H0UTG3_CAVPO | Uncharacterized protein OS=Cavia porcellus GN=DHX8 PE=4 SV=1               | CAVPO | 2 |

|      |      |      |       |       |       |                        |                                                                              |       |   |
|------|------|------|-------|-------|-------|------------------------|------------------------------------------------------------------------------|-------|---|
| 3080 | 1.04 | 1.12 | 7.813 | 4.297 | 4.297 | tr H0VE50 H0VE50_CAVPO | Uncharacterized protein OS=Cavia porcellus<br>GN=SYPL1 PE=4 SV=1             | CAVPO | 1 |
| 3081 | 1.04 | 1.13 | 12.83 | 4.934 | 4.934 | tr H0VH11 H0VH11_CAVPO | Uncharacterized protein OS=Cavia porcellus<br>GN=GULP1 PE=4 SV=1             | CAVPO | 1 |
| 3082 | 1.04 | 1.16 | 8.084 | 8.084 | 3.892 | tr H0VM28 H0VM28_CAVPO | Uncharacterized protein OS=Cavia porcellus<br>GN=WDR54 PE=4 SV=1             | CAVPO | 1 |
| 3083 | 1.03 | 1.18 | 6.872 | 2.974 | 1.231 | tr H0UWG9 H0UWG9_CAVPO | Uncharacterized protein OS=Cavia porcellus<br>GN=BICD1 PE=4 SV=1             | CAVPO | 1 |
| 3084 | 1.02 | 9.08 | 38.46 | 38.46 | 25    | tr H0UWS5 H0UWS5_CAVPO | Uncharacterized protein OS=Cavia porcellus<br>GN=RAB6B PE=3 SV=1             | CAVPO | 7 |
| 3085 | 1.02 | 1.15 | 10.59 | 10.59 | 10.59 | tr H0UYQ1 H0UYQ1_CAVPO | Uncharacterized protein OS=Cavia porcellus<br>GN=RAB23 PE=3 SV=1             | CAVPO | 2 |
| 3086 | 1.02 | 1.1  | 2.125 | 1.417 | 1.417 | tr H0V743 H0V743_CAVPO | Uncharacterized protein (Fragment) OS=Cavia<br>porcellus GN=VPS41 PE=4 SV=1  | CAVPO | 1 |
| 3087 | 1.02 | 1.11 | 8.408 | 3.754 | 2.102 | tr H0W330 H0W330_CAVPO | Uncharacterized protein (Fragment) OS=Cavia<br>porcellus GN=MTSS1L PE=4 SV=1 | CAVPO | 2 |
| 3088 | 1.01 | 1.14 | 13.06 | 11.34 | 3.78  | tr H0UX94 H0UX94_CAVPO | Uncharacterized protein (Fragment) OS=Cavia<br>porcellus GN=BRCC3 PE=4 SV=1  | CAVPO | 1 |
| 3089 | 1.01 | 1.09 | 4.455 | 1.382 | 1.382 | tr H0V3Q5 H0V3Q5_CAVPO | Uncharacterized protein OS=Cavia porcellus<br>GN=GUSB PE=4 SV=1              | CAVPO | 1 |
| 3090 | 1.01 | 1.1  | 11.85 | 4.502 | 3.081 | tr H0VNJ6 H0VNJ6_CAVPO | Uncharacterized protein (Fragment) OS=Cavia<br>porcellus GN=ACP2 PE=4 SV=1   | CAVPO | 1 |
| 3091 | 1.01 | 1.1  | 6.921 | 3.103 | 3.103 | tr H0VVA8 H0VVA8_CAVPO | Uncharacterized protein OS=Cavia porcellus<br>GN=FAH PE=4 SV=1               | CAVPO | 1 |
| 3092 | 1.01 | 1.13 | 12.22 | 7.386 | 3.977 | tr H0W0V2 H0W0V2_CAVPO | Uncharacterized protein (Fragment) OS=Cavia<br>porcellus GN=RFC5 PE=4 SV=1   | CAVPO | 1 |
| 3093 | 1    | 1.11 | 35.92 | 24.65 | 10.56 | tr H0UYV9 H0UYV9_CAVPO | Uncharacterized protein OS=Cavia porcellus<br>GN=POLR2D PE=4 SV=1            | CAVPO | 1 |



|      |      |      |       |        |        |                        |                                                                                      |       |   |
|------|------|------|-------|--------|--------|------------------------|--------------------------------------------------------------------------------------|-------|---|
| 3094 | 1    | 1.2  | 9.515 | 5.519  | 1.427  | tr H0VMR6 H0VMR6_CAVPO | Uncharacterized protein (Fragment) OS=Cavia porcellus GN=STXBP5 PE=4 SV=1            | CAVPO | 1 |
| 3095 | 1    | 1.08 | 3.377 | 1.028  | 1.028  | tr H0VPX5 H0VPX5_CAVPO | Uncharacterized protein (Fragment) OS=Cavia porcellus GN=GFPT2 PE=4 SV=1             | CAVPO | 1 |
| 3096 | 1    | 1.11 | 29.03 | 28.23  | 14.52  | tr H0VVR8 H0VVR8_CAVPO | Uncharacterized protein OS=Cavia porcellus GN=TAX1BP3 PE=4 SV=1                      | CAVPO | 1 |
| 3097 | 0.99 | 1.1  | 3.557 | 0.8893 | 0.8893 | tr H0UY81 H0UY81_CAVPO | Uncharacterized protein OS=Cavia porcellus GN=Man2b1 PE=4 SV=1                       | CAVPO | 1 |
| 3098 | 0.99 | 1.11 | 7.67  | 2.136  | 1.068  | tr H0V275 H0V275_CAVPO | Protein phosphatase 1 regulatory subunit 12 OS=Cavia porcellus GN=PPP1R12A PE=3 SV=1 | CAVPO | 1 |
| 3099 | 0.99 | 1.12 | 3.517 | 2.164  | 2.164  | tr H0VBN6 H0VBN6_CAVPO | Uncharacterized protein (Fragment) OS=Cavia porcellus GN=RBM6 PE=4 SV=1              | CAVPO | 2 |
| 3100 | 0.99 | 1.11 | 6.529 | 6.529  | 3.78   | tr H0VS01 H0VS01_CAVPO | Uncharacterized protein OS=Cavia porcellus GN=SSR1 PE=4 SV=1                         | CAVPO | 1 |
| 3101 | 0.99 | 1.13 | 11.51 | 2.188  | 0.8914 | tr H0W331 H0W331_CAVPO | Uncharacterized protein OS=Cavia porcellus GN=CGNL1 PE=4 SV=1                        | CAVPO | 1 |
| 3102 | 0.98 | 1.06 | 1.391 | 1.391  | 1.391  | tr H0UW95 H0UW95_CAVPO | Uncharacterized protein OS=Cavia porcellus GN=EBF2 PE=3 SV=1                         | CAVPO | 1 |
| 3103 | 0.98 | 3.46 | 21.12 | 12.81  | 4.719  | tr H0V9T2 H0V9T2_CAVPO | Uncharacterized protein (Fragment) OS=Cavia porcellus GN=RGS6 PE=4 SV=1              | CAVPO | 2 |
| 3104 | 0.98 | 1.13 | 12.8  | 6.581  | 2.011  | tr H0VH88 H0VH88_CAVPO | Uncharacterized protein (Fragment) OS=Cavia porcellus GN=NSRP1 PE=4 SV=1             | CAVPO | 1 |
| 3105 | 0.98 | 1.08 | 3.346 | 1.983  | 0.9913 | tr H0VNV8 H0VNV8_CAVPO | Uncharacterized protein OS=Cavia porcellus GN=SLC39A10 PE=4 SV=1                     | CAVPO | 1 |
| 3106 | 0.98 | 1.07 | 29.63 | 29.63  | 12.35  | tr H0W5Y8 H0W5Y8_CAVPO | Uncharacterized protein OS=Cavia porcellus GN=CTNNBIP1 PE=4 SV=1                     | CAVPO | 1 |
| 3107 | 0.97 | 1.05 | 1.831 | 1.831  | 1.831  | tr H0UUW5 H0UUW5_CAVPO | Uncharacterized protein OS=Cavia porcellus GN=GXYLT1 PE=4 SV=1                       | CAVPO | 1 |

|      |      |      |       |       |       |                        |                                                                               |       |   |
|------|------|------|-------|-------|-------|------------------------|-------------------------------------------------------------------------------|-------|---|
| 3108 | 0.97 | 1.08 | 5.028 | 3.352 | 2.235 | tr H0V2K9 H0V2K9_CAVPO | Uncharacterized protein OS=Cavia porcellus<br>GN=ACSS2 PE=4 SV=1              | CAVPO | 1 |
| 3109 | 0.97 | 1.07 | 22.4  | 15.3  | 8.743 | tr H0V539 H0V539_CAVPO | Uncharacterized protein OS=Cavia porcellus<br>GN=EMC4 PE=4 SV=1               | CAVPO | 1 |
| 3110 | 0.97 | 1.07 | 17.86 | 10    | 6.429 | tr H0V5W7 H0V5W7_CAVPO | Uncharacterized protein OS=Cavia porcellus<br>GN=C14orf1 PE=4 SV=1            | CAVPO | 1 |
| 3111 | 0.97 | 2.19 | 14.02 | 5.793 | 2.134 | tr H0VDG0 H0VDG0_CAVPO | Uncharacterized protein (Fragment) OS=Cavia<br>porcellus GN=SRGAP2 PE=4 SV=1  | CAVPO | 2 |
| 3112 | 0.97 | 1.05 | 3.834 | 3.834 | 3.834 | tr H0W9N9 H0W9N9_CAVPO | Uncharacterized protein OS=Cavia porcellus<br>GN=PTGR1 PE=4 SV=1              | CAVPO | 1 |
| 3113 | 0.96 | 1.04 | 2.55  | 2.55  | 2.55  | tr H0VfV0 H0VfV0_CAVPO | Uncharacterized protein (Fragment) OS=Cavia<br>porcellus GN=CASC4 PE=4 SV=1   | CAVPO | 1 |
| 3114 | 0.96 | 1.04 | 9.691 | 2.68  | 2.68  | tr H0VN00 H0VN00_CAVPO | Uncharacterized protein OS=Cavia porcellus<br>GN=NLE1 PE=4 SV=1               | CAVPO | 1 |
| 3115 | 0.96 | 1.07 | 10.8  | 6.62  | 3.833 | tr H0VP55 H0VP55_CAVPO | Uncharacterized protein OS=Cavia porcellus<br>GN=SLC25A10 PE=3 SV=1           | CAVPO | 1 |
| 3116 | 0.96 | 1.06 | 4.857 | 1.743 | 1.743 | tr H0W6Y4 H0W6Y4_CAVPO | Uncharacterized protein OS=Cavia porcellus<br>GN=PLA2G6 PE=4 SV=1             | CAVPO | 1 |
| 3117 | 0.95 | 1.03 | 5.825 | 1.699 | 1.699 | tr H0UXC9 H0UXC9_CAVPO | Uncharacterized protein OS=Cavia porcellus<br>GN=BCAS3 PE=4 SV=1              | CAVPO | 1 |
| 3118 | 0.95 | 1.08 | 8.083 | 5.774 | 3.233 | tr H0V1F1 H0V1F1_CAVPO | Uncharacterized protein OS=Cavia porcellus<br>GN=MFGE8 PE=4 SV=1              | CAVPO | 1 |
| 3119 | 0.95 | 1.14 | 13.97 | 3.752 | 1.423 | tr H0VAW5 H0VAW5_CAVPO | Uncharacterized protein (Fragment) OS=Cavia<br>porcellus GN=AMPD3 PE=4 SV=1   | CAVPO | 1 |
| 3120 | 0.95 | 1.12 | 5.316 | 2.409 | 1.08  | tr H0VIK5 H0VIK5_CAVPO | Uncharacterized protein (Fragment) OS=Cavia<br>porcellus GN=ATP13A1 PE=3 SV=1 | CAVPO | 1 |
| 3121 | 0.95 | 2.07 | 11.07 | 4.024 | 4.024 | tr H0VZM6 H0VZM6_CAVPO | Uncharacterized protein OS=Cavia porcellus<br>GN=PPP2R5B PE=4 SV=1            | CAVPO | 2 |

|      |      |      |       |        |        |                        |                                                                           |       |   |
|------|------|------|-------|--------|--------|------------------------|---------------------------------------------------------------------------|-------|---|
| 3122 | 0.95 | 1.1  | 27.11 | 15.49  | 4.577  | tr H0W7L5 H0W7L5_CAVPO | Uncharacterized protein (Fragment) OS=Cavia porcellus GN=NEK7 PE=3 SV=1   | CAVPO | 1 |
| 3123 | 0.94 | 1.04 | 7.46  | 3.968  | 2.063  | tr H0V0A8 H0V0A8_CAVPO | Uncharacterized protein OS=Cavia porcellus GN=PLS1 PE=4 SV=1              | CAVPO | 1 |
| 3124 | 0.94 | 1.09 | 13.77 | 6.587  | 1.996  | tr H0V2Q3 H0V2Q3_CAVPO | Uncharacterized protein OS=Cavia porcellus GN=TRAF2 PE=4 SV=1             | CAVPO | 1 |
| 3125 | 0.94 | 1.01 | 2.672 | 2.672  | 2.672  | tr H0V961 H0V961_CAVPO | Alkaline phosphatase OS=Cavia porcellus GN=ALPL PE=3 SV=1                 | CAVPO | 1 |
| 3126 | 0.94 | 1.01 | 6.202 | 6.202  | 6.202  | tr H0VGV4 H0VGV4_CAVPO | Uncharacterized protein OS=Cavia porcellus GN=CHRA1 PE=4 SV=1             | CAVPO | 1 |
| 3127 | 0.94 | 1.02 | 8.723 | 2.492  | 2.492  | tr H0W353 H0W353_CAVPO | Gap junction protein OS=Cavia porcellus GN=GJD2 PE=3 SV=1                 | CAVPO | 1 |
| 3128 | 0.93 | 1    | 5.423 | 1.952  | 1.952  | tr H0UVL0 H0UVL0_CAVPO | Uncharacterized protein (Fragment) OS=Cavia porcellus GN=SHE PE=4 SV=1    | CAVPO | 1 |
| 3129 | 0.93 | 1.05 | 11.74 | 4.027  | 2.181  | tr H0V4T2 H0V4T2_CAVPO | Uncharacterized protein (Fragment) OS=Cavia porcellus GN=FNBP1L PE=4 SV=1 | CAVPO | 1 |
| 3130 | 0.93 | 1.13 | 2.527 | 0.9232 | 0.9232 | tr H0V905 H0V905_CAVPO | Uncharacterized protein OS=Cavia porcellus GN=ATG2B PE=4 SV=1             | CAVPO | 2 |
| 3131 | 0.93 | 1.01 | 3.831 | 1.057  | 1.057  | tr H0VM06 H0VM06_CAVPO | Uncharacterized protein (Fragment) OS=Cavia porcellus GN=TRPV2 PE=4 SV=1  | CAVPO | 1 |
| 3132 | 0.93 | 1.06 | 7.407 | 1.955  | 0.823  | tr H0VNJ7 H0VNJ7_CAVPO | Uncharacterized protein OS=Cavia porcellus GN=NAA25 PE=4 SV=1             | CAVPO | 1 |
| 3133 | 0.93 | 2.18 | 6.75  | 5.25   | 5.25   | tr H0W0W4 H0W0W4_CAVPO | Uncharacterized protein (Fragment) OS=Cavia porcellus GN=ECSIT PE=4 SV=1  | CAVPO | 2 |
| 3134 | 0.92 | 1.01 | 6.954 | 1.656  | 1.656  | tr H0V3A0 H0V3A0_CAVPO | Uncharacterized protein OS=Cavia porcellus GN=ERCC4 PE=4 SV=1             | CAVPO | 1 |
| 3135 | 0.92 | 1.11 | 16.1  | 13.37  | 0      | tr H0VA08 H0VA08_CAVPO | Uncharacterized protein OS=Cavia porcellus GN=SLC27A2 PE=4 SV=1           | CAVPO | 0 |

|      |      |      |       |        |        |                        |                                                                              |       |   |
|------|------|------|-------|--------|--------|------------------------|------------------------------------------------------------------------------|-------|---|
| 3136 | 0.91 | 1.05 | 6.009 | 3.147  | 2.146  | tr H0V307 H0V307_CAVPO | Uncharacterized protein OS=Cavia porcellus<br>GN=METTL13 PE=4 SV=1           | CAVPO | 1 |
| 3137 | 0.91 | 1.03 | 7.269 | 3.438  | 1.572  | tr H0V9G0 H0V9G0_CAVPO | Uncharacterized protein (Fragment) OS=Cavia<br>porcellus GN=HIP1R PE=4 SV=1  | CAVPO | 1 |
| 3138 | 0.91 | 1    | 16.14 | 6.316  | 3.86   | tr H0VSD0 H0VSD0_CAVPO | Uncharacterized protein OS=Cavia porcellus<br>GN=VPS37B PE=4 SV=1            | CAVPO | 1 |
| 3139 | 0.91 | 0.99 | 1.596 | 1.596  | 1.596  | tr H0W3H0 H0W3H0_CAVPO | Uncharacterized protein (Fragment) OS=Cavia<br>porcellus GN=MKL1 PE=4 SV=1   | CAVPO | 1 |
| 3140 | 0.9  | 0.98 | 1.499 | 1.499  | 1.499  | tr H0UVJ1 H0UVJ1_CAVPO | Uncharacterized protein (Fragment) OS=Cavia<br>porcellus GN=AFG3L2 PE=3 SV=1 | CAVPO | 1 |
| 3141 | 0.9  | 1    | 12.16 | 5.707  | 3.226  | tr H0V2P0 H0V2P0_CAVPO | Uncharacterized protein OS=Cavia porcellus<br>GN=JMJD6 PE=4 SV=1             | CAVPO | 1 |
| 3142 | 0.9  | 0.98 | 3.401 | 1.511  | 0.8816 | tr H0VCY3 H0VCY3_CAVPO | Uncharacterized protein (Fragment) OS=Cavia<br>porcellus PE=4 SV=1           | CAVPO | 1 |
| 3143 | 0.89 | 3.45 | 28.3  | 12.71  | 7.674  | tr H0V1H2 H0V1H2_CAVPO | Uncharacterized protein OS=Cavia porcellus<br>GN=ACTR3B PE=3 SV=1            | CAVPO | 3 |
| 3144 | 0.89 | 1.02 | 15.79 | 15.79  | 8.772  | tr H0V4D1 H0V4D1_CAVPO | Uncharacterized protein OS=Cavia porcellus<br>GN=CNOT7 PE=4 SV=1             | CAVPO | 2 |
| 3145 | 0.89 | 0.99 | 2.752 | 0.8891 | 0.6351 | tr H0V5G4 H0V5G4_CAVPO | Uncharacterized protein (Fragment) OS=Cavia<br>porcellus GN=EP300 PE=4 SV=1  | CAVPO | 2 |
| 3146 | 0.89 | 0.98 | 8.587 | 1.789  | 1.789  | tr H0V5H1 H0V5H1_CAVPO | Uncharacterized protein (Fragment) OS=Cavia<br>porcellus GN=PRKAA1 PE=4 SV=1 | CAVPO | 1 |
| 3147 | 0.89 | 0.97 | 16.74 | 11.63  | 11.63  | tr H0V7B4 H0V7B4_CAVPO | Uncharacterized protein OS=Cavia porcellus<br>GN=GTF3C6 PE=4 SV=1            | CAVPO | 2 |
| 3148 | 0.89 | 1    | 17.91 | 3.582  | 3.582  | tr H0V8T6 H0V8T6_CAVPO | Uncharacterized protein OS=Cavia porcellus<br>GN=TAF7 PE=4 SV=1              | CAVPO | 1 |
| 3149 | 0.89 | 0.97 | 11.17 | 5.825  | 5.825  | tr H0VJN0 H0VJN0_CAVPO | Sulfhydryl oxidase OS=Cavia porcellus<br>GN=GFER PE=3 SV=1                   | CAVPO | 1 |

|      |      |      |       |        |        |                        |                                                                             |       |   |
|------|------|------|-------|--------|--------|------------------------|-----------------------------------------------------------------------------|-------|---|
| 3150 | 0.89 | 0.97 | 9.05  | 9.05   | 9.05   | tr H0VV64 H0VV64_CAVPO | Uncharacterized protein OS=Cavia porcellus<br>GN=SDF2L1 PE=4 SV=1           | CAVPO | 1 |
| 3151 | 0.89 | 1.03 | 8.639 | 1.538  | 1.538  | tr H0W355 H0W355_CAVPO | Uncharacterized protein OS=Cavia porcellus<br>GN=SLMAP PE=4 SV=1            | CAVPO | 1 |
| 3152 | 0.88 | 0.98 | 3.719 | 2.273  | 2.273  | tr H0UVK1 H0UVK1_CAVPO | Uncharacterized protein (Fragment) OS=Cavia<br>porcellus GN=FAF1 PE=4 SV=1  | CAVPO | 1 |
| 3153 | 0.88 | 0.96 | 1.852 | 1.852  | 1.852  | tr H0UYU9 H0UYU9_CAVPO | Uncharacterized protein OS=Cavia porcellus<br>GN=ARL13B PE=4 SV=1           | CAVPO | 1 |
| 3154 | 0.88 | 1.2  | 20.5  | 20.5   | 8.368  | tr H0UYW7 H0UYW7_CAVPO | Uncharacterized protein (Fragment) OS=Cavia<br>porcellus GN=IDI1 PE=4 SV=1  | CAVPO | 1 |
| 3155 | 0.88 | 0.97 | 5.411 | 3.247  | 3.247  | tr H0V9A9 H0V9A9_CAVPO | Uncharacterized protein (Fragment) OS=Cavia<br>porcellus GN=FSD1L PE=4 SV=1 | CAVPO | 1 |
| 3156 | 0.88 | 0.97 | 12.54 | 12.54  | 5.018  | tr H0V9W4 H0V9W4_CAVPO | Uncharacterized protein (Fragment) OS=Cavia<br>porcellus GN=M6PR PE=4 SV=1  | CAVPO | 1 |
| 3157 | 0.88 | 1    | 2.853 | 2.853  | 1.712  | tr H0VNT9 H0VNT9_CAVPO | Uncharacterized protein OS=Cavia porcellus<br>GN=SLC9A6 PE=4 SV=1           | CAVPO | 1 |
| 3158 | 0.88 | 0.97 | 2.876 | 0.5351 | 0.5351 | tr H0VQ20 H0VQ20_CAVPO | Uncharacterized protein OS=Cavia porcellus<br>GN=RALGAPB PE=4 SV=1          | CAVPO | 1 |
| 3159 | 0.88 | 0.96 | 19.23 | 9.615  | 9.615  | tr H0VYD7 H0VYD7_CAVPO | Uncharacterized protein OS=Cavia porcellus<br>GN=COA3 PE=4 SV=1             | CAVPO | 1 |
| 3160 | 0.87 | 1.61 | 7.246 | 5.007  | 4.084  | tr H0UVC4 H0UVC4_CAVPO | Uncharacterized protein OS=Cavia porcellus<br>GN=STRN4 PE=4 SV=1            | CAVPO | 3 |
| 3161 | 0.87 | 0.97 | 4.928 | 3.816  | 2.385  | tr H0UW79 H0UW79_CAVPO | Uncharacterized protein OS=Cavia porcellus<br>GN=PRPF39 PE=4 SV=1           | CAVPO | 1 |
| 3162 | 0.87 | 0.96 | 13.89 | 3.945  | 2.23   | tr H0VAY5 H0VAY5_CAVPO | Uncharacterized protein OS=Cavia porcellus<br>GN=RALGPS2 PE=4 SV=1          | CAVPO | 1 |
| 3163 | 0.87 | 0.95 | 3.182 | 1.477  | 1.477  | tr H0VB32 H0VB32_CAVPO | Uncharacterized protein (Fragment) OS=Cavia<br>porcellus GN=DAG1 PE=4 SV=1  | CAVPO | 1 |

|      |      |      |       |       |       |                        |                                                                                |       |   |
|------|------|------|-------|-------|-------|------------------------|--------------------------------------------------------------------------------|-------|---|
| 3164 | 0.87 | 1.11 | 14.62 | 9.745 | 3.248 | tr H0VF39 H0VF39_CAVPO | Uncharacterized protein OS=Cavia porcellus<br>GN=GTF2E1 PE=4 SV=1              | CAVPO | 1 |
| 3165 | 0.87 | 0.95 | 5.446 | 5.446 | 5.446 | tr H0VLL4 H0VLL4_CAVPO | Uncharacterized protein OS=Cavia porcellus<br>GN=CASP3 PE=3 SV=1               | CAVPO | 1 |
| 3166 | 0.86 | 1.86 | 6.982 | 4.617 | 3.153 | tr H0V157 H0V157_CAVPO | Uncharacterized protein OS=Cavia porcellus<br>GN=GRIA3 PE=4 SV=1               | CAVPO | 2 |
| 3167 | 0.86 | 0.95 | 5.91  | 3.11  | 1.4   | tr H0VC26 H0VC26_CAVPO | Uncharacterized protein OS=Cavia porcellus<br>GN=GCLC PE=4 SV=1                | CAVPO | 1 |
| 3168 | 0.85 | 0.93 | 1.653 | 1.653 | 1.653 | tr H0V5W6 H0V5W6_CAVPO | Uncharacterized protein (Fragment) OS=Cavia<br>porcellus GN=SOAT2 PE=4 SV=1    | CAVPO | 1 |
| 3169 | 0.85 | 0.96 | 13.35 | 5.908 | 3.063 | tr H0VWC0 H0VWC0_CAVPO | Uncharacterized protein OS=Cavia porcellus<br>GN=NUP50 PE=4 SV=1               | CAVPO | 1 |
| 3170 | 0.85 | 0.93 | 5.257 | 2.628 | 2.628 | tr H0W002 H0W002_CAVPO | Uncharacterized protein OS=Cavia porcellus<br>GN=ELFN1 PE=4 SV=1               | CAVPO | 1 |
| 3171 | 0.84 | 0.96 | 22.39 | 22.39 | 13.43 | tr H0V6H5 H0V6H5_CAVPO | Uncharacterized protein OS=Cavia porcellus<br>GN=POLR2L PE=3 SV=1              | CAVPO | 1 |
| 3172 | 0.84 | 3.09 | 9.553 | 2.881 | 1.895 | tr H0VCI8 H0VCI8_CAVPO | Uncharacterized protein OS=Cavia porcellus<br>GN=SPAG9 PE=4 SV=1               | CAVPO | 2 |
| 3173 | 0.84 | 0.92 | 2.907 | 2.907 | 2.907 | tr H0VGC3 H0VGC3_CAVPO | Uncharacterized protein (Fragment) OS=Cavia<br>porcellus GN=FIZ1 PE=4 SV=1     | CAVPO | 1 |
| 3174 | 0.84 | 0.92 | 8.716 | 5.963 | 5.963 | tr H0VYE5 H0VYE5_CAVPO | Uncharacterized protein OS=Cavia porcellus<br>GN=LOC100723309 PE=4 SV=1        | CAVPO | 1 |
| 3175 | 0.83 | 0.91 | 4.276 | 4.276 | 4.276 | tr H0UXZ4 H0UXZ4_CAVPO | Uncharacterized protein OS=Cavia porcellus<br>GN=PHF11 PE=4 SV=1               | CAVPO | 1 |
| 3176 | 0.83 | 0.92 | 5.806 | 2.151 | 2.151 | tr H0V380 H0V380_CAVPO | Uncharacterized protein OS=Cavia porcellus<br>GN=STK38 PE=4 SV=1               | CAVPO | 1 |
| 3177 | 0.83 | 0.91 | 3.695 | 1.192 | 1.192 | tr H0V6F5 H0V6F5_CAVPO | Uncharacterized protein (Fragment) OS=Cavia<br>porcellus GN=ARHGAP12 PE=4 SV=1 | CAVPO | 1 |

|      |      |      |       |        |        |                        |                                                                             |       |   |
|------|------|------|-------|--------|--------|------------------------|-----------------------------------------------------------------------------|-------|---|
| 3178 | 0.83 | 0.91 | 3.008 | 3.008  | 3.008  | tr H0VB29 H0VB29_CAVPO | Uncharacterized protein OS=Cavia porcellus<br>GN=Asah1 PE=4 SV=1            | CAVPO | 1 |
| 3179 | 0.83 | 0.91 | 7.805 | 7.805  | 7.805  | tr H0VDR6 H0VDR6_CAVPO | Uncharacterized protein OS=Cavia porcellus<br>GN=PPP1R1B PE=4 SV=1          | CAVPO | 1 |
| 3180 | 0.83 | 0.94 | 6.711 | 6.711  | 6.711  | tr H0VJQ7 H0VJQ7_CAVPO | Uncharacterized protein OS=Cavia porcellus<br>GN=REM1 PE=4 SV=1             | CAVPO | 2 |
| 3181 | 0.83 | 0.95 | 10.4  | 8.389  | 8.389  | tr H0WCV1 H0WCV1_CAVPO | Uncharacterized protein OS=Cavia porcellus<br>GN=TMEM38A PE=4 SV=1          | CAVPO | 2 |
| 3182 | 0.82 | 0.89 | 1.987 | 1.192  | 1.192  | tr H0V0A1 H0V0A1_CAVPO | Uncharacterized protein (Fragment) OS=Cavia<br>porcellus GN=SORT1 PE=4 SV=1 | CAVPO | 1 |
| 3183 | 0.82 | 0.91 | 8.225 | 4.329  | 4.329  | tr H0V1Z3 H0V1Z3_CAVPO | Uncharacterized protein OS=Cavia porcellus<br>GN=SELRC1 PE=4 SV=1           | CAVPO | 1 |
| 3184 | 0.82 | 0.9  | 4.444 | 4.444  | 4.444  | tr H0VD30 H0VD30_CAVPO | Uncharacterized protein OS=Cavia porcellus<br>GN=RPA2 PE=4 SV=1             | CAVPO | 1 |
| 3185 | 0.82 | 0.95 | 2.104 | 0.4099 | 0.1913 | tr H0VLT8 H0VLT8_CAVPO | Uncharacterized protein OS=Cavia porcellus<br>GN=SMG1 PE=4 SV=1             | CAVPO | 1 |
| 3186 | 0.82 | 0.94 | 6.061 | 3.426  | 1.186  | tr H0W9J9 H0W9J9_CAVPO | Uncharacterized protein OS=Cavia porcellus<br>GN=PRRC2A PE=4 SV=1           | CAVPO | 1 |
| 3187 | 0.81 | 0.94 | 4.833 | 1.494  | 1.494  | tr H0UXI7 H0UXI7_CAVPO | Uncharacterized protein (Fragment) OS=Cavia<br>porcellus GN=EHBPI PE=4 SV=1 | CAVPO | 2 |
| 3188 | 0.81 | 0.91 | 11.15 | 7.611  | 2.832  | tr H0V0L6 H0V0L6_CAVPO | Uncharacterized protein (Fragment) OS=Cavia<br>porcellus GN=ASH2L PE=4 SV=1 | CAVPO | 1 |
| 3189 | 0.81 | 9.25 | 17.44 | 13.86  | 9.985  | tr H0V0W8 H0V0W8_CAVPO | Uncharacterized protein (Fragment) OS=Cavia<br>porcellus GN=PRKCB PE=4 SV=1 | CAVPO | 5 |
| 3190 | 0.81 | 0.89 | 1.364 | 1.364  | 1.364  | tr H0V6F3 H0V6F3_CAVPO | Oxysterol-binding protein OS=Cavia porcellus<br>GN=OSBPL11 PE=3 SV=1        | CAVPO | 1 |
| 3191 | 0.81 | 0.91 | 30.26 | 4.103  | 4.103  | tr H0VH74 H0VH74_CAVPO | Uncharacterized protein OS=Cavia porcellus<br>GN=CHP1 PE=4 SV=1             | CAVPO | 1 |

|      |      |      |       |        |        |                        |                                                                              |       |   |
|------|------|------|-------|--------|--------|------------------------|------------------------------------------------------------------------------|-------|---|
| 3192 | 0.81 | 0.89 | 2.866 | 1.508  | 1.508  | tr H0VQ00 H0VQ00_CAVPO | Uncharacterized protein OS=Cavia porcellus<br>GN=CHFR PE=4 SV=1              | CAVPO | 1 |
| 3193 | 0.81 | 1.81 | 19.73 | 19.73  | 19.73  | tr H0VRJ6 H0VRJ6_CAVPO | Uncharacterized protein (Fragment) OS=Cavia<br>porcellus GN=UBE2D4 PE=3 SV=1 | CAVPO | 5 |
| 3194 | 0.8  | 0.93 | 4.025 | 0.3696 | 0.3696 | tr H0UUM7 H0UUM7_CAVPO | Uncharacterized protein OS=Cavia porcellus<br>GN=MAST4 PE=4 SV=1             | CAVPO | 1 |
| 3195 | 0.8  | 0.91 | 8.738 | 6.796  | 3.56   | tr H0V4N7 H0V4N7_CAVPO | Uncharacterized protein OS=Cavia porcellus<br>GN=UPRT PE=4 SV=1              | CAVPO | 1 |
| 3196 | 0.8  | 0.88 | 14.47 | 14.47  | 14.47  | tr H0V813 H0V813_CAVPO | Uncharacterized protein OS=Cavia porcellus<br>GN=ZNF706 PE=4 SV=1            | CAVPO | 1 |
| 3197 | 0.8  | 0.93 | 19.76 | 10.38  | 2.595  | tr H0VD77 H0VD77_CAVPO | Uncharacterized protein OS=Cavia porcellus<br>GN=DKC1 PE=4 SV=1              | CAVPO | 1 |
| 3198 | 0.8  | 0.88 | 5.128 | 2.885  | 2.885  | tr H0VFN7 H0VFN7_CAVPO | Uncharacterized protein OS=Cavia porcellus<br>GN=YIPF3 PE=4 SV=1             | CAVPO | 1 |
| 3199 | 0.8  | 0.88 | 5.854 | 5.854  | 5.854  | tr H0WA69 H0WA69_CAVPO | Uncharacterized protein OS=Cavia porcellus<br>GN=DUT PE=4 SV=1               | CAVPO | 1 |
| 3200 | 0.79 | 0.93 | 6.776 | 1.46   | 0.7593 | tr H0V7X8 H0V7X8_CAVPO | Uncharacterized protein OS=Cavia porcellus<br>GN=NUP98 PE=4 SV=1             | CAVPO | 1 |
| 3201 | 0.79 | 0.94 | 2.817 | 1.863  | 0.4998 | tr H0VZH7 H0VZH7_CAVPO | Uncharacterized protein OS=Cavia porcellus<br>GN=TNC PE=4 SV=1               | CAVPO | 1 |
| 3202 | 0.79 | 0.93 | 12.26 | 6.452  | 2.151  | tr H0WAP3 H0WAP3_CAVPO | Uncharacterized protein OS=Cavia porcellus<br>GN=ARHGEF9 PE=4 SV=1           | CAVPO | 1 |
